# Supplementary material for: Heteroleptic iron(ii) complexes of chiral 2,6-bis(oxazolin-2-yl)-pyridine (PyBox) and 2,6-bis(thiazolin-2-yl)pyridine ligands – the interplay of two different ligands on the metal ion spin sate
Source: Royal Society of Chemistry journal article supplement (doi:10.1039/d2dt00393g), 2022-01-01
Supplement: d2dt00393g1.pdf [file d2dt00393g1.pdf]

# **Heteroleptic Iron(II) Complexes of Chiral 2,6-Bis(Oxazolin-2-yl)-pyridine (PyBox) and 2,6-Bis(Thiazolin-2-yl)pyridine Ligands – the Interplay of Two Different Ligands on the Metal Ion Spin State**

Namrah Shahid,<sup>a,b</sup> Kay E. Burrows,<sup>a</sup> Christopher M. Pask,<sup>a</sup> Oscar Cespedes,<sup>c</sup>  
Mark J. Howard,<sup>a</sup> Patrick C. McGowan<sup>a</sup> and Malcolm A. Halcrow<sup>a,\*</sup>

<sup>a</sup>*School of Chemistry, University of Leeds, Woodhouse Lane, Leeds LS2 9JT,  
United Kingdom.  
E-mail: m.a.halcrow@leeds.ac.uk*

<sup>b</sup>*Current address: Department of Chemistry, University of Durham, Durham DH1 3LE,  
United Kingdom.*

<sup>c</sup>*School of Physics and Astronomy, University of Leeds, WH Bragg Building, Leeds LS2 9JT,  
United Kingdom.*

**Supporting Information**

|                                                                                                                                                                  | Page |
|------------------------------------------------------------------------------------------------------------------------------------------------------------------|------|
| <b>Complex synthesis and characterisation data</b>                                                                                                               | S3   |
| <b>Description of the crystallographic structure refinements</b>                                                                                                 | S5   |
| <b>Table S1</b> Experimental data for the crystal structure determinations.                                                                                      | S7   |
| <b>Definitions of the structural parameters discussed in the paper</b>                                                                                           | S9   |
| <b>Scheme S1</b> Angles used in the definitions of the coordination distortion parameters $\Sigma$ and $\Theta$ .                                                | S9   |
| <b>Scheme S2</b> Definition of the Jahn-Teller distortion parameters $\theta$ and $\phi$ .                                                                       | S9   |
| <b>Figure S1</b> The asymmetric unit of <b>1</b> ·MeNO <sub>2</sub> .                                                                                            | S10  |
| <b>Figure S2</b> The asymmetric unit of <b>2</b> ·MeCN.                                                                                                          | S11  |
| <b>Table S2</b> Selected bond lengths, angles and other metric parameters for <b>1</b> ·MeNO <sub>2</sub> and <b>2</b> ·MeCN.                                    | S12  |
| <b>Figure S3</b> Space-filling views of the heterochiral [Fe(L <sup>1</sup> R)(L <sup>2</sup> R)] <sup>2+</sup> cations in <b>1</b> and <b>2</b> .               | S13  |
| <b>Figure S4</b> X-ray powder diffraction data for <b>1</b> ·MeNO <sub>2</sub> and <b>2</b> .                                                                    | S14  |
| <b>Figure S5</b> Solid state magnetic susceptibility data for <b>1</b> ·MeNO <sub>2</sub> and <b>2</b> .                                                         | S15  |
| <b>Figure S6</b> <sup>1</sup> H NMR spectrum of preformed <b>1</b> .                                                                                             | S16  |
| <b>Figure S7</b> <sup>1</sup> H NMR spectra of <b>2</b> , measured 1 hr and 7 days after dissolution.                                                            | S17  |
| <b>Figure S8</b> The asymmetric unit of <b>3</b> ·MeCN.                                                                                                          | S18  |
| <b>Figure S9</b> The asymmetric unit of <b>4</b> .                                                                                                               | S19  |
| <b>Figure S10</b> The asymmetric unit of <b>5</b> .                                                                                                              | S19  |
| <b>Figure S11</b> The asymmetric unit of <b>6</b> ·MeCN·Et <sub>2</sub> O.                                                                                       | S20  |
| <b>Table S3</b> Selected bond lengths, angles and other metric parameters for <b>3</b> ·MeCN, <b>4</b> , <b>5</b> and <b>6</b> ·MeCN·Et <sub>2</sub> O.          | S21  |
| <b>Table S4</b> Hydrogen bond parameters for <b>3</b> ·MeCN, <b>4</b> , <b>5</b> and <b>6</b> ·MeCN·Et <sub>2</sub> O.                                           | S22  |
| <b>Table S5</b> Intramolecular $\pi \dots \pi$ interaction parameters for <b>3</b> ·MeCN and <b>4</b> .                                                          | S22  |
| <b>Figure S12</b> Space-filling views of the [Fe(L <sup>1</sup> R)(bimpy)] <sup>2+</sup> and [Fe(L <sup>2</sup> R)(bimpy)] <sup>2+</sup> cations in <b>3-6</b> . | S23  |
| <b>Figure S13</b> The intermolecular steric clash responsible for the S-shaped conformation of the bimpy ligand in crystals of <b>4</b> .                        | S25  |
| <b>Figure S14</b> X-ray powder diffraction data for <b>3</b> ·MeCN- <b>6</b> .                                                                                   | S26  |
| <b>Figure S15</b> <sup>1</sup> H NMR spectrum of <b>3</b> .                                                                                                      | S28  |
| <b>Figure S16</b> <sup>1</sup> H NMR spectrum of <b>4</b> .                                                                                                      | S29  |
| <b>Figure S17</b> <sup>1</sup> H NMR spectrum of <b>5</b> .                                                                                                      | S30  |
| <b>Figure S18</b> <sup>1</sup> H NMR spectrum of <b>6</b> .                                                                                                      | S31  |
| <b>Figure S19</b> The asymmetric unit of <b>8</b> ·2MeCN.                                                                                                        | S32  |
| <b>Table S6</b> Selected bond lengths, angles and other metric parameters for <b>8</b> ·2MeCN.                                                                   | S32  |
| <b>Table S7</b> Intramolecular $\pi \dots \pi$ interaction parameters for <b>8</b> ·2MeCN.                                                                       | S33  |
| <b>Figure S20</b> Space-filling view of the [Fe(L <sup>2</sup> Ph)(bpp)] <sup>2+</sup> cation in <b>8</b> ·2MeCN.                                                | S33  |
| <b>Figure S21</b> Room temperature X-ray powder diffraction data for <b>7-10</b> ·2H <sub>2</sub> O.                                                             | S34  |
| <b>Figure S22</b> Solid state magnetic susceptibility data for <b>7-10</b> ·2H <sub>2</sub> O.                                                                   | S35  |
| <b>Figure S23</b> <sup>1</sup> H NMR spectrum of <b>7</b> .                                                                                                      | S36  |
| <b>Figure S24</b> <sup>1</sup> H NMR spectrum of <b>8</b> .                                                                                                      | S37  |
| <b>Figure S25</b> <sup>1</sup> H NMR spectrum of <b>9</b> .                                                                                                      | S38  |
| <b>Figure S26</b> <sup>1</sup> H NMR spectrum of <b>10</b> .                                                                                                     | S39  |

|                                                                                                                                                                                           | Page |
|-------------------------------------------------------------------------------------------------------------------------------------------------------------------------------------------|------|
| <b>Figure S27</b> Room temperature X-ray powder diffraction data for <b>11</b> ·H <sub>2</sub> O and <b>12</b> .                                                                          | S40  |
| <b>Figure S28</b> Solid state magnetic susceptibility data for <b>11</b> ·H <sub>2</sub> O and <b>12</b> .                                                                                | S41  |
| <b>Figure S29</b> The asymmetric unit of [Fe(terpy) <sub>2</sub> ][ClO <sub>4</sub> ] <sub>2</sub> ·2MeCN.                                                                                | S42  |
| <b>Figure S30</b> <sup>1</sup> H NMR spectrum of <b>11</b> .                                                                                                                              | S43  |
| <b>Figure S31</b> <sup>1</sup> H NMR spectrum of <b>12</b> .                                                                                                                              | S44  |
| <b>Figure S32</b> Solution magnetic susceptibility data for <b>11</b> ·H <sub>2</sub> O and <b>12</b> .                                                                                   | S45  |
| <b>Figure S33</b> DFT energy-minimised structures of <b>1</b> <sup>2+</sup> and <b>2</b> <sup>2+</sup> .                                                                                  | S46  |
| <b>Table S8</b> Computed metric parameters for <b>1</b> <sup>2+</sup> and <b>2</b> <sup>2+</sup> .                                                                                        | S47  |
| <b>Figure S34</b> Alternative views of energy-minimised <b>1</b> <sup>2+</sup> and <b>2</b> <sup>2+</sup> , emphasising the conformations of the heterocyclic ligands.                    | S48  |
| <b>Figure S35</b> DFT energy-minimised structures of <b>3</b> <sup>2+</sup> - <b>12</b> <sup>2+</sup> and the other [Fe(LR)L] <sup>2+</sup> complexes (L = bimpy, bpp or terpy).          | S49  |
| <b>Table S9</b> Computed metric parameters for <b>3</b> <sup>2+</sup> - <b>12</b> <sup>2+</sup> and the other the [Fe(LR)L] <sup>2+</sup> complexes (L = bimpy, bpp or terpy).            | S53  |
| <b>Figure S36</b> Alternative views of the energy-minimised [Fe(LR)L] <sup>2+</sup> complexes (L = bimpy, bpp or terpy), emphasising the conformations of the heterocyclic ligands.       | S57  |
| <b>Figure S37</b> Computed frontier molecular orbital energies of the low-spin [Fe(LR)(bimpy)] <sup>2+</sup> derivatives <b>3</b> <sup>2+</sup> - <b>6</b> <sup>2+</sup> .                | S61  |
| <b>Figure S38</b> Computed frontier molecular orbital energies of the low-spin [Fe(LR)(bpp)] <sup>2+</sup> derivatives <b>7</b> <sup>2+</sup> - <b>10</b> <sup>2+</sup> .                 | S62  |
| <b>Figure S39</b> Computed frontier molecular orbital energies of the low-spin [Fe(LR)(terpy)] <sup>2+</sup> derivatives including <b>11</b> <sup>2+</sup> and <b>12</b> <sup>2+</sup> .  | S63  |
| <b>Figure S40</b> Computed molecular structures for the organic ligands.                                                                                                                  | S64  |
| <b>Table S10</b> Computed energies of the minimised organic ligands, and the energies of their metal-binding lone pair combination MOs.                                                   | S65  |
| <b>Discussion of the donor and acceptor character of the metal-free ligands</b>                                                                                                           | S65  |
| <b>Figure S41</b> Computed frontier molecular orbital energies of metal-free ligands in this study.                                                                                       | S66  |
| <b>Table S11</b> Computed energies of the homoleptic complexes, used to calculate $\Delta E\{\text{het}\}$ for the heterochiral molecules.                                                | S67  |
| <b>Table S12</b> Computed energies of [Fe(LH)L] <sup>2+</sup> (L = bimpy, bpp or terpy), the unsubstituted analogues of the heteroleptic complexes synthesised in this work.              | S67  |
| <b>Figure S42</b> DFT energy-minimised structures of [Fe(bimpy) <sub>2</sub> ] <sup>2+</sup> and [Fe(terpy) <sub>2</sub> ] <sup>2+</sup> .                                                | S68  |
| <b>Figure S43</b> DFT energy-minimised structures of [Fe(LH)L] <sup>2+</sup> (L = bimpy, bpp or terpy), the unsubstituted analogues of <b>3</b> <sup>2+</sup> - <b>12</b> <sup>2+</sup> . | S69  |
| <b>Table S13</b> Atomic coordinates for the DFT-minimised complexes in this work.                                                                                                         | S71  |
| <b>Table S14</b> Atomic coordinates for the DFT-minimised metal-free ligands.                                                                                                             | S108 |
| <b>Table S15</b> Atomic coordinates for the other DFT-minimised complexes used to calculate $\Delta E\{\text{het}\}$ .                                                                    | S113 |
| <b>References</b>                                                                                                                                                                         | S130 |

## Complex synthesis and Characterisation Data

The  $L^1R$ ,  $L^2R^2$  and  $bpp^3$  ligands were synthesised using literature procedures. Other ligand and metal salt reagents, and organic solvents, were purchased commercially and used as supplied.

**Caution.** Although we have experienced no problems when using the perchlorate salts in this study, metal–organic perchlorates are potentially explosive and should be handled with care in small quantities.

**Complex synthesis.** The same protocol was used to synthesise all the complexes, with minor variations as described below. Around 0.25 mmol of the two ligands used was dissolved in acetonitrile (20 cm<sup>3</sup>), then an equimolar amount of solid  $Fe[ClO_4]_2 \cdot 6H_2O$  was added to the solution. The mixture was stirred at room temperature for the stated length of time, when all the solids had dissolved, then concentrated to *ca* 5 cm<sup>3</sup> volume. Slow diffusion of diethyl ether vapour into the filtered solution yielded the solid complex products, which were purified as described below.

Complexes containing  $L^2iPr$  were prepared on a reduced scale, because the challenging synthesis of that ligand meant it was only available in small quantities.<sup>2</sup>

**Synthesis of  $[Fe((S)-L^1Ph)((R)-L^2Ph)][ClO_4]_2 \cdot MeNO_2$  (**1·MeNO<sub>2</sub>**).** Method as above, using (*S*)- $L^1Ph$  (89 mg, 0.24 mmol), (*R*)- $L^2Ph$  (96 mg, 0.24 mmol) and  $Fe[ClO_4]_2 \cdot 6H_2O$  (88 mg, 0.24 mmol). The dark purple solution was stirred for 20 hrs before workup. Recrystallisation of the crude purple powder from nitromethane solution by diethyl ether vapour diffusion afforded single crystals of the complex. Yield 171 mg, 66 %. Found: C, 51.8; H, 3.67; N, 8.87 %. Calcd for  $C_{46}H_{38}Cl_2FeN_6O_{10}S_2 \cdot CH_3NO_2$ : C, 51.9; H, 3.80; N, 9.02 %. <sup>1</sup>H NMR ( $CD_3CN$ )  $\delta$  3.6 (2H), 3.8 (2H), 5.0 (2H), 5.2 (2H), 5.4 (2H), 5.7 (4H), 6.0 (2H), 6.5 (4H), 7.0 (4H), 7.3 (8H), 10.1 (1H), 11.4 (1H), 14.7 (2H), 15.0 (2H). Contact-shifted peaks arising from  $[Fe((S)-L^1Ph)_2]^{2+}$  are also resolved,<sup>4</sup> in a ratio of *ca* 0.15:1 compared to the main species (Figure 2).

The presence of one equiv nitromethane in this compound was confirmed crystallographically.

**Synthesis of  $[Fe((R)-L^1iPr)((S)-L^2iPr)][ClO_4]_2$  (**2**).** Method as above, using reduced quantities of (*R*)- $L^1iPr$  (18 mg, 0.06 mmol), (*S*)- $L^2iPr$  (22 mg, 0.06 mmol) and  $Fe[ClO_4]_2 \cdot 6H_2O$  (22 mg, 0.06 mmol) with the solvent volumes scaled appropriately. Diffusion of diethyl ether vapour into the filtered reaction solution yielded purple crystals of **2·MeCN**, which lost their lattice solvent upon exposure to air. Yield 37 mg, 69 %. Found: C, 45.7; H, 5.01; N, 9.09 %. Calcd for  $C_{34}H_{46}Cl_2FeN_6O_{10}S_2$ : C, 45.9; H, 5.21; N, 9.45 %. <sup>1</sup>H NMR ( $CD_3CN$ )  $\delta$  -10.0 (6H), -8.3 (2H), -4.8 (6H), -1.9 (6H), -1.6 (6H), 6.0 (2H), 9.2 (2H), 14.4 (4H), 15.6 (2H), 16.6 (2H), 20.8 (1H), 27.0 (1H), 60.9 (4H). One more resonance of integral 2H is expected upfield of 2 ppm, corresponding to an *isopropyl* CH environment. However this was not unambiguously identified, and could be masked by solvent peaks (Figure S7). Peaks arising from  $[Fe((R)-L^1iPr)_2]^{2+}$  are also present,<sup>4</sup> in a ratio of *ca* 0.20:1 compared to the main species, along with some uncoordinated ligand which is probably  $L^2iPr$ .

**Synthesis of  $[Fe((R)-L^1Ph)(bimpy)][ClO_4]_2 \cdot MeCN$  (**3·MeCN**).** Method as above, using (*R*)- $L^1Ph$  (103 mg, 0.28 mmol), *bimpy* (87 mg, 0.28 mmol) and  $Fe[ClO_4]_2 \cdot 6H_2O$  (102 mg, 0.28 mmol). The purple-red solution was stirred for 20 hrs before workup, which afforded purple single crystals of the product in analytical purity. Yield 228 mg, 83 %. Found: C, 53.9; H, 3.54; N, 12.8 %. Calcd for  $C_{42}H_{32}Cl_2FeN_8O_{10} \cdot CH_3CN$ : C, 54.1; H, 3.61; N, 12.9 %. <sup>1</sup>H NMR ( $CD_3CN$ )  $\delta$  3.8 (2H), 4.1 (2H), 4.3 (2H), 5.5 (4H), 5.9 (2H), 6.0 (2H), 6.5 (2H), 6.8 (2H), 7.5 (2H), 11.8 (1H), 12.1 (2H), 16.6 (2H), 27.8 (1H), 33.1 (2H), 33.9 (2H), 36.3 (2H).

The presence of one equiv acetonitrile in this material was confirmed crystallographically.

**Synthesis of  $[Fe((R)-L^2Ph)(bimpy)][ClO_4]_2 \cdot H_2O$  (**4·H<sub>2</sub>O**).** Method as above, using (*R*)- $L^2Ph$  (112 mg, 0.28 mmol), *bimpy* (87 mg, 0.28 mmol) and  $Fe[ClO_4]_2 \cdot 6H_2O$  (102 mg, 0.28 mmol). The purple solution was stirred for 20 hrs before workup, which afforded violet single crystals of the product. No further purification was required. Yield 126 mg, 46 %. Found: C, 50.9; H, 3.21; N, 11.1 %. Calcd for  $C_{42}H_{32}Cl_2FeN_8O_8S_2 \cdot H_2O$ : C, 51.2; H, 3.48; N, 11.4 %. <sup>1</sup>H NMR ( $CD_3CN$ )  $\delta$  2.9 (2H), 3.9 (2H), 4.2 (2H), 5.3 (4H), 6.5 (6H), 7.1 (2H), 7.2 (2H), 7.4 (2H), 8.3 (1H), 8.4 (2H), 10.2 (2H), 10.6 (2H), 10.8 (1H), 13.8 (2H).

**Synthesis of [Fe((*S*)-*L*<sup>1</sup>iPr)(bimpy)][ClO<sub>4</sub>]<sub>2</sub> (5).** Method as above, using (*S*)-*L*<sup>1</sup>iPr (83 mg, 0.28 mmol), bimpy (87 mg, 0.28 mmol) and Fe[ClO<sub>4</sub>]<sub>2</sub>·6H<sub>2</sub>O (102 mg, 0.28 mmol). The purple-red solution was stirred for 20 hrs before workup. The crude purple powder gave a dark red crystalline solid after recrystallisation from acetone solution by diethyl ether vapour diffusion. Yield 130 mg, 53 %. Found: C, 49.6; H, 3.86; N, 13.4 %. Calcd for C<sub>36</sub>H<sub>36</sub>Cl<sub>2</sub>O<sub>10</sub>FeN<sub>8</sub>: C, 49.9; H, 4.18; N, 12.9 %. <sup>1</sup>H NMR (CD<sub>3</sub>CN) δ -29.0 (6H), -12.6 (2H), -7.5 (6H), 7.1 (2H), 7.9 (1H), 13.1 (2H), 17.4 (2H), 18.6 (2H), 21.2 (1H), 26.4 (2H), 37.4 (2H), 55.7 (2H), 60.8 (2H), 63.9 (2H). Peaks from [Fe((*R*)-*L*<sup>1</sup>iPr)<sub>2</sub>]<sup>2+</sup> are also present,<sup>4</sup> in a ratio of *ca* 0.25:1 compared to the main species, along with extra peaks in the diamagnetic region which might be uncoordinated bimpy.

**Synthesis of [Fe((*S*)-*L*<sup>2</sup>iPr)(bimpy)][ClO<sub>4</sub>]<sub>2</sub> (6).** Method as above, but using half-quantities of (*S*)-*L*<sup>2</sup>iPr (53 mg, 0.16 mmol), bimpy (47 mg, 0.16 mmol) and Fe[ClO<sub>4</sub>]<sub>2</sub>·6H<sub>2</sub>O (58 mg, 0.16 mmol) with the solvent volumes scaled appropriately. The purple solution was stirred for 20 hrs before workup, which afforded purple crystals suitable for X-ray diffraction. Yield 54 mg, 40 %. Found: C, 47.7; H, 3.87; N, 12.2 %. Calcd for C<sub>36</sub>H<sub>36</sub>Cl<sub>2</sub>FeN<sub>8</sub>O<sub>8</sub>S<sub>2</sub>: C, 48.1; H, 4.03; N, 12.5 %. <sup>1</sup>H NMR (CD<sub>3</sub>CN) δ -5.9 (6H), -4.4 (2H), -0.7 (6H), 5.1 (2H), 5.2 (2H), 5.4 (2H), 7.0 (2H), 7.3 (2H), 9.1 (2H), 10.5 (1H), 12.5 (2H), 16.3 (1H), 20.3 (2H), 21.1 (2H), 23.0 (2H).

**Synthesis of [Fe((*R*)-*L*<sup>1</sup>Ph)(bpp)][ClO<sub>4</sub>]<sub>2</sub> (7).** Method as above, using (*R*)-*L*<sup>1</sup>Ph (89 mg, 0.24 mmol), bpp (52 mg, 0.24 mmol) and Fe[ClO<sub>4</sub>]<sub>2</sub>·6H<sub>2</sub>O (88 mg, 0.24 mmol). The dark brown solution was stirred for 2 hrs before workup, giving a red-brown polycrystalline product which was analysed without further purification. Yield 117 mg, 59 %. Found: C, 48.6; H, 3.38; N, 13.0 %. Calcd for C<sub>34</sub>H<sub>28</sub>Cl<sub>2</sub>FeN<sub>8</sub>O<sub>10</sub>: C, 48.9; H, 3.38; N, 13.4 <sup>1</sup>H NMR (CD<sub>3</sub>CN) δ 0.7 (4H), 3.8 (2H), 5.4 (4H), 6.2 (2H), 7.4 (1H), 9.1 (2H), 9.4 (2H), 20.8 (2H), 23.8 (2H), 26.8 (1H), 34.0 (2H), 38.5 (2H), 40.0 (2H).

**Synthesis of [Fe((*R*)-*L*<sup>2</sup>Ph)(bpp)][ClO<sub>4</sub>]<sub>2</sub>·MeCN·H<sub>2</sub>O (8·MeCN·H<sub>2</sub>O).** Method as above, using (*R*)-*L*<sup>2</sup>Ph (96 mg, 0.24 mmol), bpp (52 mg, 0.24 mmol) and Fe[ClO<sub>4</sub>]<sub>2</sub>·6H<sub>2</sub>O (88 mg, 0.24 mmol). The dark brown solution was stirred for 2 hrs before workup. The reaction mixture yielded the product as brown single crystals, after the manual removal of a small quantity of yellow [Fe(bpp)<sub>2</sub>][ClO<sub>4</sub>]<sub>2</sub>.<sup>5</sup> Yield 185 mg, 89 %. Found: C, 46.7; H, 3.28; N, 13.9 %. Calcd for C<sub>34</sub>H<sub>28</sub>Cl<sub>2</sub>FeN<sub>8</sub>O<sub>8</sub>S<sub>2</sub>·CH<sub>3</sub>CN·H<sub>2</sub>O: C, 46.7; H, 3.59; N, 13.6 %. <sup>1</sup>H NMR (CD<sub>3</sub>CN) δ 2.2 (2H), 4.2 (4H), 5.4 (2H), 5.8 (1H), 6.3 (4H), 6.7 (4H), 12.4 (2H), 12.7 (2H), 13.1 (1H), 14.9 (2H), 15.5 (2H), 15.7 (2H). Peaks from [Fe(bpp)<sub>2</sub>]<sup>2+</sup> are also present in a ratio of *ca* 0.10:1 compared to the main species.<sup>6</sup>

The crystals of this complex contain two equiv acetonitrile, so the microanalysis implies partial replacement of that solvent by atmospheric moisture.

**Synthesis of [Fe((*S*)-*L*<sup>1</sup>iPr)(bpp)][ClO<sub>4</sub>]<sub>2</sub>·MeNO<sub>2</sub> (9·MeNO<sub>2</sub>)** Method as above, using (*S*)-*L*<sup>1</sup>iPr (69 mg, 0.23 mmol), bpp (49 mg, 0.23 mmol) and Fe[ClO<sub>4</sub>]<sub>2</sub>·6H<sub>2</sub>O (87 mg, 0.23 mmol). The bright red solution was stirred for 2 hrs before workup. The crude product was recrystallised from nitromethane solution by diethyl ether vapour diffusion, giving a red polycrystalline solid containing a small quantity of yellow [Fe(bpp)<sub>2</sub>][ClO<sub>4</sub>]<sub>2</sub>,<sup>5</sup> which was removed manually. Recrystallised yield 66 mg, 37 %. Found: C, 42.4; H, 3.88; N, 15.0 %. Calcd for C<sub>28</sub>H<sub>32</sub>Cl<sub>2</sub>FeN<sub>8</sub>O<sub>10</sub>·CH<sub>3</sub>NO<sub>2</sub>: C, 42.1; H, 4.26; N, 15.2 <sup>1</sup>H NMR (CD<sub>3</sub>CN) δ -36.1 (6H), -13.7 (2H), -6.0 (6H), 3.4 (1H), 10.2 (2H), 15.8 (2H), 24.2 (2H), 33.7 (2H), 39.4 (2H), 59.0 (2H), 67.7 (2H), 68.9 (2H). One more resonance expected from the molecule could not be unambiguously identified (Figure S25). Peaks from [Fe(bpp)<sub>2</sub>]<sup>2+</sup> are also present in a ratio of *ca* 0.15:1 compared to the main species,<sup>6</sup> along with weak resonances in the diamagnetic region which may be uncoordinated *L*<sup>1</sup>iPr.

**Synthesis of [Fe((*S*)-*L*<sup>2</sup>iPr)(bpp)][ClO<sub>4</sub>]<sub>2</sub>·2H<sub>2</sub>O (10·2H<sub>2</sub>O).** Method as above, but using half-quantities of (*S*)-*L*<sup>2</sup>iPr (39 mg, 0.12 mmol), bpp (25 mg, 0.12 mmol) and Fe[ClO<sub>4</sub>]<sub>2</sub>·6H<sub>2</sub>O (44 mg, 0.12 mmol) with the solvent volumes scaled appropriately. The red-brown solution was stirred for 3 hrs before workup. The product was a brown powder, containing a small quantity of yellow [Fe(bpp)<sub>2</sub>][ClO<sub>4</sub>]<sub>2</sub><sup>5</sup> which was removed manually. Yield 53 mg, 56 %. Found: C, 40.3; H, 3.99; N, 13.1 %. Calcd for C<sub>28</sub>H<sub>32</sub>Cl<sub>2</sub>FeN<sub>8</sub>O<sub>8</sub>S<sub>2</sub>·2H<sub>2</sub>O: C, 40.3; H, 4.34; N, 13.4. <sup>1</sup>H NMR (CD<sub>3</sub>CN) δ -8.2 (6H), -5.2 (2H), -1.4 (6H), 2.9 (1H), 7.6 (2H), 8.2 (2H), 10.7 (2H), 18.5 (1H), 21.5 (2H), 21.8 (2H), 28.9 (2H), 31.7 (2H), 33.2 (2H). Peaks from [Fe(bpp)<sub>2</sub>]<sup>2+</sup> are also

present in a ratio of *ca* 0.20:1 compared to the main species,<sup>6</sup> along with another weak paramagnetic molecule whose identity is unclear (Figure S26).

**Synthesis of [Fe(*R*)-*L*<sup>1</sup>Ph](terpy)][ClO<sub>4</sub>]<sub>2</sub>·H<sub>2</sub>O (**11**·H<sub>2</sub>O).** Method as above, using (*R*)-*L*<sup>1</sup>Ph (103 mg, 0.28 mmol), terpy (66 mg, 0.28 mmol) and Fe[ClO<sub>4</sub>]<sub>2</sub>·6H<sub>2</sub>O (102 mg, 0.28 mmol). The dark purple solution was stirred for 20 hrs before workup, giving a purple polycrystalline product. Yield 174 mg, 74 %. Found: C, 51.9; H, 3.45; N, 9.62 %. Calcd for C<sub>38</sub>H<sub>30</sub>FeCl<sub>2</sub>N<sub>6</sub>O<sub>10</sub>·H<sub>2</sub>O: C, 52.1; H, 3.68; N, 9.60 %.

This material contains a mixture of diamagnetic species by <sup>1</sup>H NMR, including [Fe(terpy)<sub>2</sub>]<sup>2+</sup> (Figure S30).<sup>7</sup> Recrystallisation of the product from by nitromethane/diethyl ether vapour diffusion yielded a mixture of powder and dark purple crystals, which proved to be a solvate of [Fe(terpy)<sub>2</sub>][ClO<sub>4</sub>]<sub>2</sub> (Figure S29). Hence, despite its good microanalysis, **11**·H<sub>2</sub>O is evidently a mixture of species.

**Synthesis of [Fe(*S*)-*L*<sup>1</sup>iPr](terpy)][ClO<sub>4</sub>]<sub>2</sub> (**12**).** Method as above, using (*S*)-*L*<sup>1</sup>iPr (86 mg, 0.28 mmol), terpy (66 mg, 0.28 mmol) and Fe[ClO<sub>4</sub>]<sub>2</sub>·6H<sub>2</sub>O (102 mg, 0.28 mmol). The dark purple solution was stirred for 20 hrs before workup, giving a purple polycrystalline product. Yield 129 mg, 74 %. Found: C, 48.5; H, 4.10; N, 10.6 %. Calcd for C<sub>32</sub>H<sub>34</sub>FeCl<sub>2</sub>N<sub>6</sub>O<sub>10</sub>: C, 48.7; H, 4.34; N, 10.7 %.

The comments about the composition of **11**·H<sub>2</sub>O also apply to this material.

### Single Crystal Structure Analyses

All crystals were grown by slow diffusion of diethyl ether vapour into concentrated solutions of the complexes. Nitromethane was used as the crystallisation solvent for **1**·MeNO<sub>2</sub>, while all the other crystals were obtained from acetonitrile solution.

Diffraction data for **4** were collected at station I19 of the Diamond synchrotron ( $\lambda = 0.6889 \text{ \AA}$ ). The other crystals were measured with an Agilent Supernova dual-source diffractometer using monochromated Cu-*K*<sub>α</sub> ( $\lambda = 1.5418 \text{ \AA}$ ) radiation. The diffractometer was fitted with an Oxford Cryostream low-temperature device. Experimental details of the structure determinations in this study are given in Tables S1-S2. All the structures were solved by direct methods (*SHELXS*<sup>8</sup>), and developed by full least-squares refinement on *F*<sup>2</sup> (*SHELXL-2018*<sup>8</sup>). Crystallographic figures were prepared using *XSEED*,<sup>9</sup> and octahedral coordination volumes (*V*<sub>Oh</sub>) were calculated with *Olex2*.<sup>10</sup>

Unless otherwise stated, the following protocols were used. All crystallographically ordered non-H atoms in these refinements were refined anisotropically. Disordered anions were modelled with refined Cl–O and O···O distance restraints, and disordered lattice solvent molecules were modelled using fixed bond length and angle restraints. All H atoms were placed in calculated positions and refined using a riding model.

**Structure refinement of [Fe(*S*)-*L*<sup>1</sup>Ph)((*R*)-*L*<sup>2</sup>Ph)][ClO<sub>4</sub>]<sub>2</sub>·MeNO<sub>2</sub> (**1**·MeNO<sub>2</sub>)** Phenyl substituent C(13)-C(18) is disordered over two half-occupied orientations, which were refined with all C–C bond distances constrained to be the same (*SHELXL SADI* instruction). The O atoms of one perchlorate ion are also disordered over two equally occupied sites.

**Structure refinement of [Fe(*R*)-*L*<sup>1</sup>iPr)((*S*)-*L*<sup>1</sup>iPr)][ClO<sub>4</sub>]<sub>2</sub>·MeCN (**2**·MeCN).** The asymmetric unit contains two formula units of the compound, that is: two complex dications, four perchlorate ions and two acetonitrile molecules on general crystallographic sites. All four anions and both solvent molecules are disordered over two or three sites, which were treated as described above. All crystallographically ordered non-H atoms, plus Cl atoms from the major orientations of two of the anions, were refined anisotropically.

*ADDSYM* notes pseudo-inversion symmetry in the crystal,<sup>11</sup> but the Flack parameter of 0.010(2) confirms this is not true inversion symmetry. An attempted refinement in the suggested alternative space group *P2<sub>1</sub>/c* gave much higher residuals (*R*<sub>1</sub> = 0.19, *wR*<sub>2</sub> = 0.43). Hence, we are confident our choice of the *P2<sub>1</sub>* space group is correct.

**Structure refinement of [Fe((R)-L<sup>1</sup>Ph)(bimpy)][ClO<sub>4</sub>]<sub>2</sub>·MeCN (3·MeCN).** A minor twin domain in the dataset was noted by *CheckCif*, and was accounted for in the final refinement using *Olex2*.<sup>10</sup> The twin law is 0 1 0 1 0 0 0 -1, and the ratio of the twin domains refined to 0.98:0.02. The refinement has low precision, but this is likely to reflect the effect of the highly anisotropic unit cell ( $a = b = 10.6 \text{ \AA}$ ,  $c = 73.8 \text{ \AA}$ ) on the data rather than this very minor twinning.

The asymmetric unit contains two formula units of the compound, with two complex dications, four ClO<sub>4</sub><sup>-</sup> anions and two solvent molecules on general crystallographic sites. No disorder is present in the model, which was refined without distance restraints. However, four atoms in the model required a *SHELXL ISOR* restraint to stop them becoming prolate or non-positive definite. All non-H atoms were refined anisotropically, and H atoms were fixed in calculated positions and refined using a riding model.

The highest residual Fourier peak of  $+1.0 e \text{ \AA}^{-3}$  is  $0.8 \text{ \AA}$  from Fe(1A).

**Structure refinement of [Fe((R)-L<sup>2</sup>Ph)(bimpy)][ClO<sub>4</sub>]<sub>2</sub> (4).** Minor disorder in one anion was included in the final model, to mop up a residual Fourier peak. Two orientations of that anion were refined with a 0.90:0.10 occupancy ratio, and refined distance restraints were applied to the minor anion site. All non-H atoms except the minor anion disorder site were refined anisotropically.

**Structure refinement of [Fe((S)-L<sup>1</sup>iPr)(bimpy)][ClO<sub>4</sub>]<sub>2</sub> (5).** Crystals of this compound were consistently twinned. After several attempted data collections, this dataset was successfully deconvoluted into two twin domains using the twin law  $-1 0 0 0 0 1 0 1 0$ , in a refined ratio of 0.36:0.64. While the refinement residuals are good, the model has relatively low precision because of this twinning.

*Isopropyl* group C(21)-C(23) is disordered over two equally occupied sites, and was modelled with the refined restraints C-C = 1.53(2) and 1,3-C...C = 2.50(2)  $\text{\AA}$ . All crystallographically ordered non-H atoms were refined anisotropically.

**Structure refinement of [Fe((S)-L<sup>2</sup>iPr)(bimpy)][ClO<sub>4</sub>]<sub>2</sub>·MeCN·Et<sub>2</sub>O (6·MeCN·Et<sub>2</sub>O).** The diethyl ether molecule is disordered over two equally occupied sites, which were treated with fixed distance restraints. All crystallographically ordered non-H atoms were refined anisotropically.

**Structure refinement of [Fe((R)-L<sup>2</sup>Ph)(1-bpp)][ClO<sub>4</sub>]<sub>2</sub>·2MeCN (8·2MeCN).** One perchlorate ion in this structure is disordered over two sites, with refined occupancies of 0.73 and 0.27. These were treated with refined distance restraints, as described above. All non-H atoms except the minor anion disorder site were refined anisotropically.

**Structure refinement of [Fe(terpy)<sub>2</sub>][ClO<sub>4</sub>]<sub>2</sub>·2MeCN.** The asymmetric unit contains two formula units of the compound; that is, two complex dications, four perchlorate anions and four acetonitrile molecules. Two of the ClO<sub>4</sub><sup>-</sup> ions were refined over two disorder sites, with refined occupancy ratios of 0.65:0.35 and 0.75:0.25. The  $U_{\text{iso}}$  parameters of the O atoms in the minor disorder site of each anion were also constrained to be equal. One MeCN molecule is also disordered, and was modelled over two half-occupied orientations.

CCDC 2132824-2132830 contain the supplementary crystallographic data for this paper (Table S1). These data can be obtained free of charge from The Cambridge Crystallographic Data Centre via [www.ccdc.cam.ac.uk/data\\_request/cif](http://www.ccdc.cam.ac.uk/data_request/cif).

**Table S1** Experimental data for the crystal structures in this work. Data were collected using Cu- $K_{\alpha}$  radiation unless otherwise stated.

|                                                  | 1-MeNO <sub>2</sub>                                                                             | 2-MeCN                                                                                          | 3-MeCN                                                                           | 4                                                                                              |
|--------------------------------------------------|-------------------------------------------------------------------------------------------------|-------------------------------------------------------------------------------------------------|----------------------------------------------------------------------------------|------------------------------------------------------------------------------------------------|
| molecular formula                                | C <sub>47</sub> H <sub>41</sub> Cl <sub>2</sub> FeN <sub>7</sub> O <sub>12</sub> S <sub>2</sub> | C <sub>36</sub> H <sub>49</sub> Cl <sub>2</sub> FeN <sub>7</sub> O <sub>10</sub> S <sub>2</sub> | C <sub>44</sub> H <sub>35</sub> Cl <sub>2</sub> FeN <sub>9</sub> O <sub>10</sub> | C <sub>42</sub> H <sub>32</sub> Cl <sub>2</sub> FeN <sub>8</sub> O <sub>8</sub> S <sub>2</sub> |
| $M_r$                                            | 1086.74                                                                                         | 930.69                                                                                          | 976.56                                                                           | 967.62                                                                                         |
| crystal class                                    | monoclinic                                                                                      | monoclinic                                                                                      | tetragonal                                                                       | monoclinic                                                                                     |
| space group                                      | $P2_1$                                                                                          | $P2_1$                                                                                          | $P4_1$                                                                           | $P2_1$                                                                                         |
| $a / \text{\AA}$                                 | 11.9689(2)                                                                                      | 11.3515(1)                                                                                      | 10.6379(1)                                                                       | 9.9525(1)                                                                                      |
| $b / \text{\AA}$                                 | 12.0094(1)                                                                                      | 18.6328(3)                                                                                      | 10.6379(1)                                                                       | 18.2692(1)                                                                                     |
| $c / \text{\AA}$                                 | 16.2339(2)                                                                                      | 20.5925(3)                                                                                      | 73.8154(8)                                                                       | 11.2555(1)                                                                                     |
| $\alpha / ^\circ$                                | 90                                                                                              | 90                                                                                              | 90                                                                               | 90                                                                                             |
| $\beta / ^\circ$                                 | 94.775(1)                                                                                       | 102.246(1)                                                                                      | 90                                                                               | 90.601(1)                                                                                      |
| $\gamma / ^\circ$                                | 90                                                                                              | 90                                                                                              | 90                                                                               | 90                                                                                             |
| $V / \text{\AA}^3$                               | 2325.35(5)                                                                                      | 4256.42(10)                                                                                     | 8353.31(18)                                                                      | 2046.41(3)                                                                                     |
| $Z$                                              | 2                                                                                               | 4                                                                                               | 8                                                                                | 2                                                                                              |
| $T / \text{K}$                                   | 125(2)                                                                                          | 130(2)                                                                                          | 130(2)                                                                           | 100(2)                                                                                         |
| $\mu\{\text{Cu-}K_{\alpha}\} / \text{mm}^{-1}$   | 5.120                                                                                           | 5.445                                                                                           | 4.698                                                                            | 0.617 <sup>c</sup>                                                                             |
| $D_c / \text{gcm}^{-3}$                          | 1.552                                                                                           | 1.452                                                                                           | 1.553                                                                            | 1.570                                                                                          |
| measured reflections                             | 20842                                                                                           | 37789                                                                                           | 32362                                                                            | 32540                                                                                          |
| independent reflections                          | 8622                                                                                            | 15763                                                                                           | 16045                                                                            | 17281                                                                                          |
| $R_{\text{int}}$                                 | 0.037                                                                                           | 0.036                                                                                           | 0.053                                                                            | 0.027                                                                                          |
| parameters                                       | 632                                                                                             | 1067                                                                                            | 1192                                                                             | 589                                                                                            |
| restraints                                       | 52                                                                                              | 98                                                                                              | 25                                                                               | 11                                                                                             |
| $R_1 [F_0 > 4\sigma(F_0)]^a$                     | 0.036                                                                                           | 0.059                                                                                           | 0.071                                                                            | 0.029                                                                                          |
| $wR_2$ , all data <sup>b</sup>                   | 0.092                                                                                           | 0.157                                                                                           | 0.159                                                                            | 0.074                                                                                          |
| goodness of fit                                  | 1.036                                                                                           | 1.064                                                                                           | 1.131                                                                            | 1.040                                                                                          |
| $\Delta\rho_{\text{min/max}} / e\text{\AA}^{-3}$ | -0.43/0.66                                                                                      | -0.72/0.81                                                                                      | -0.56/0.98                                                                       | -0.33/0.34                                                                                     |
| Flack parameter                                  | -0.005(2)                                                                                       | 0.009(2)                                                                                        | -0.002(3)                                                                        | 0.022(4)                                                                                       |
| CCDC                                             | 2132824                                                                                         | 2132825                                                                                         | 2132826                                                                          | 2132827                                                                                        |

$$^a R = \Sigma [ |F_o| - |F_c| ] / \Sigma |F_o|$$

$$^b wR = [\Sigma w(F_o^2 - F_c^2) / \Sigma wF_o^4]^{1/2}$$

<sup>c</sup>Collected with synchrotron radiation.



**Table S1** continued.

|                                                                                           | <b>5</b>                                                                         | <b>6·MeCN·Et<sub>2</sub>O</b>                                                                  | <b>8·2MeCN</b>                                                                                  | <b>[Fe(terpy)<sub>2</sub>][ClO<sub>4</sub>]<sub>2</sub>·2MeCN</b>               |
|-------------------------------------------------------------------------------------------|----------------------------------------------------------------------------------|------------------------------------------------------------------------------------------------|-------------------------------------------------------------------------------------------------|---------------------------------------------------------------------------------|
| molecular formula                                                                         | C <sub>36</sub> H <sub>36</sub> Cl <sub>2</sub> FeN <sub>8</sub> O <sub>10</sub> | C <sub>42</sub> H <sub>49</sub> Cl <sub>2</sub> FeN <sub>9</sub> O <sub>9</sub> S <sub>2</sub> | C <sub>38</sub> H <sub>34</sub> Cl <sub>2</sub> FeN <sub>10</sub> O <sub>8</sub> S <sub>2</sub> | C <sub>34</sub> H <sub>28</sub> Cl <sub>2</sub> FeN <sub>8</sub> O <sub>8</sub> |
| <i>M<sub>r</sub></i>                                                                      | 867.48                                                                           | 1014.77                                                                                        | 949.62                                                                                          | 803.39                                                                          |
| crystal class                                                                             | orthorhombic                                                                     | monoclinic                                                                                     | orthorhombic                                                                                    | tetragonal                                                                      |
| space group                                                                               | <i>P</i> 2 <sub>1</sub> 2 <sub>1</sub> 2 <sub>1</sub>                            | <i>P</i> 2 <sub>1</sub>                                                                        | <i>P</i> 2 <sub>1</sub> 2 <sub>1</sub> 2 <sub>1</sub>                                           | <i>P</i> 4 <sub>3</sub>                                                         |
| <i>a</i> / Å                                                                              | 10.1310(5)                                                                       | 9.0025(3)                                                                                      | 8.8452(1)                                                                                       | 12.2320(1)                                                                      |
| <i>b</i> / Å                                                                              | 19.1776(10)                                                                      | 24.0613(9)                                                                                     | 20.3285(3)                                                                                      | 12.2320(1)                                                                      |
| <i>c</i> / Å                                                                              | 19.2647(10)                                                                      | 11.2550(5)                                                                                     | 22.9238(4)                                                                                      | 47.2452(6)                                                                      |
| <i>α</i> / °                                                                              | 90                                                                               | 90                                                                                             | 90                                                                                              | 90                                                                              |
| <i>β</i> / °                                                                              | 90                                                                               | 106.649(4)                                                                                     | 90                                                                                              | 90                                                                              |
| <i>γ</i> / °                                                                              | 90                                                                               | 90                                                                                             | 90                                                                                              | 90                                                                              |
| <i>V</i> / Å <sup>3</sup>                                                                 | 3742.9(3)                                                                        | 2335.75(16)                                                                                    | 4121.92(11)                                                                                     | 7068.91(15)                                                                     |
| <i>Z</i>                                                                                  | 4                                                                                | 2                                                                                              | 4                                                                                               | 8                                                                               |
| <i>T</i> / K                                                                              | 120(2)                                                                           | 130(2)                                                                                         | 130(2)                                                                                          | 130(2)                                                                          |
| <i>μ</i> {Cu- <i>K</i> <i>α</i> } / mm <sup>-1</sup>                                      | 5.147                                                                            | 5.011                                                                                          | 5.630                                                                                           | 5.361                                                                           |
| <i>D<sub>c</sub></i> / gcm <sup>-3</sup>                                                  | 1.539                                                                            | 1.443                                                                                          | 1.530                                                                                           | 1.510                                                                           |
| measured reflections                                                                      | 9691                                                                             | 21424                                                                                          | 15685                                                                                           | 27682                                                                           |
| independent reflections                                                                   | 6463                                                                             | 8331                                                                                           | 7950                                                                                            | 13607                                                                           |
| <i>R</i> <sub>int</sub>                                                                   | 0.037                                                                            | 0.076                                                                                          | 0.046                                                                                           | 0.039                                                                           |
| parameters                                                                                | 515                                                                              | 586                                                                                            | 573                                                                                             | 948                                                                             |
| restraints                                                                                | 12                                                                               | 15                                                                                             | 14                                                                                              | 44                                                                              |
| <i>R</i> <sub>1</sub> [ <i>F</i> <sub>0</sub> > 4σ( <i>F</i> <sub>0</sub> )] <sup>a</sup> | 0.053                                                                            | 0.052                                                                                          | 0.041                                                                                           | 0.051                                                                           |
| <i>wR</i> <sub>2</sub> , all data <sup>b</sup>                                            | 0.143                                                                            | 0.132                                                                                          | 0.095                                                                                           | 0.129                                                                           |
| goodness of fit                                                                           | 1.044                                                                            | 1.058                                                                                          | 1.031                                                                                           | 1.034                                                                           |
| Δρ <sub>min/max</sub> / eÅ <sup>-3</sup>                                                  | -0.95/0.50                                                                       | -0.70/0.43                                                                                     | -0.35/0.33                                                                                      | -0.73/0.52                                                                      |
| Flack parameter                                                                           | 0.003(3)                                                                         | -0.009(5)                                                                                      | -0.005(4)                                                                                       | -0.005(3)                                                                       |
| CCDC                                                                                      | 2132828                                                                          | 2132829                                                                                        | 2132830                                                                                         | 2134550                                                                         |

<sup>a</sup> $R = \Sigma[|F_o| - |F_c|] / \Sigma|F_o|$

<sup>b</sup> $wR = [\Sigma w(F_o^2 - F_c^2) / \Sigma wF_o^4]^{1/2}$

<sup>c</sup>Collected with synchrotron radiation.

## Definitions of the Structural Parameters Tabulated for the Complexes

$V_{\text{Oh}}$  is the volume (in  $\text{\AA}^3$ ) of the  $\text{FeN}_6$  coordination octahedron in the complex,<sup>12</sup> which is typically  $<10 \text{\AA}^3$  in low-spin complexes of meridional *tris*-heterocyclic ligands and  $\geq 11.5 \text{\AA}^3$  in their high-spin form.<sup>13</sup>

$\Sigma$  and  $\Theta$  are defined as follows:

$$\Sigma = \sum_{i=1}^{12} |90 - \beta_i| \qquad \Theta = \sum_{j=1}^{24} |60 - \gamma_j|$$

where  $\beta_i$  are the twelve *cis*-N–Fe–N angles about the iron atom and  $\gamma_j$  are the 24 unique N–Fe–N angles measured on the projection of two triangular faces of the octahedron along their common pseudo-threefold axis (Scheme S1).  $\Sigma$  is a general measure of the deviation of a metal ion from an ideal octahedral geometry, while  $\Theta$  more specifically indicates its distortion towards a trigonal prismatic structure. A perfectly octahedral complex gives  $\Sigma = \Theta = 0$ .<sup>12,14</sup>

Because the high-spin state of a complex has a more plastic structure than the low-spin, this is reflected in  $\Sigma$  and  $\Theta$  which are usually much larger in the high-spin state. The absolute values of these parameters depend on the metal/ligand combination in the compound under investigation, however. Typical values of these parameters for complexes related to  $[\text{Fe}(\text{L}^1\text{R})_2]^{2+}$  and  $[\text{Fe}(\text{L}^2\text{R})_2]^{2+}$  are given in ref. 15.

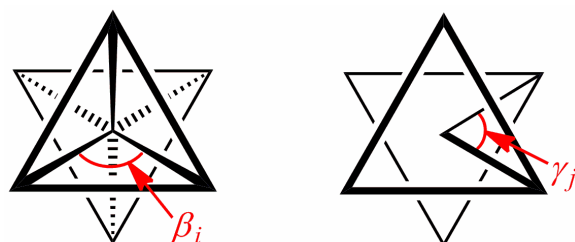

**Scheme S1.** Angles used in the definitions of the coordination distortion parameters  $\Sigma$  and  $\Theta$ .

The parameters in Scheme S2 define the relative disposition of the two tridentate ligands around the iron atom.<sup>16</sup> These should be close to their ideal values ( $\theta \approx 90^\circ$ ,  $\phi \approx 180^\circ$ ) in a low-spin complex, but high-spin compounds can show a lot more variation. Significant deviations of  $\theta$  and  $\phi$  from ideality are associated with an angular Jahn-Teller distortion of the  ${}^3T$  high-spin configuration in a high-spin complex of this type.<sup>6</sup> This distortion is often observed in high-spin complexes of *tris*-heterocyclic chelates,<sup>2,4-6,17-19</sup> including PyBox and ThioPyBox derivatives.<sup>2,4,19</sup>

Spin-crossover can be inhibited if  $\theta$  and  $\phi$  deviate significantly from their ideal values, because the associated rearrangement to a more regular low-spin coordination geometry ( $\theta \approx 90^\circ$ ,  $\phi \approx 180^\circ$ ) cannot be accommodated by a rigid solid lattice.<sup>20</sup>

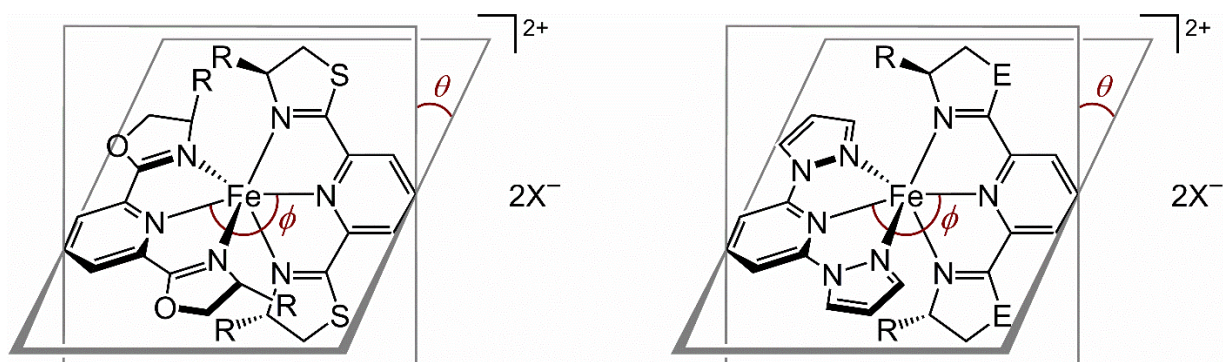

**Scheme S2.** Definition of the Jahn-Teller distortion parameters  $\theta$  and  $\phi$ , for two of the families of complexes in this work (E = O or S, R = Ph or *i*Pr).

**NB  $\phi$  is often calculated using all the non-H atoms from each tridentate ligand, which works well if the azoline rings are essentially planar. However, since the thiazoline rings in  $\text{L}^2\text{R}$  are puckered, only the coplanar pyridyl and azoline C=N groups of each ligand are used to calculate  $\phi$  in this study.<sup>2</sup>**

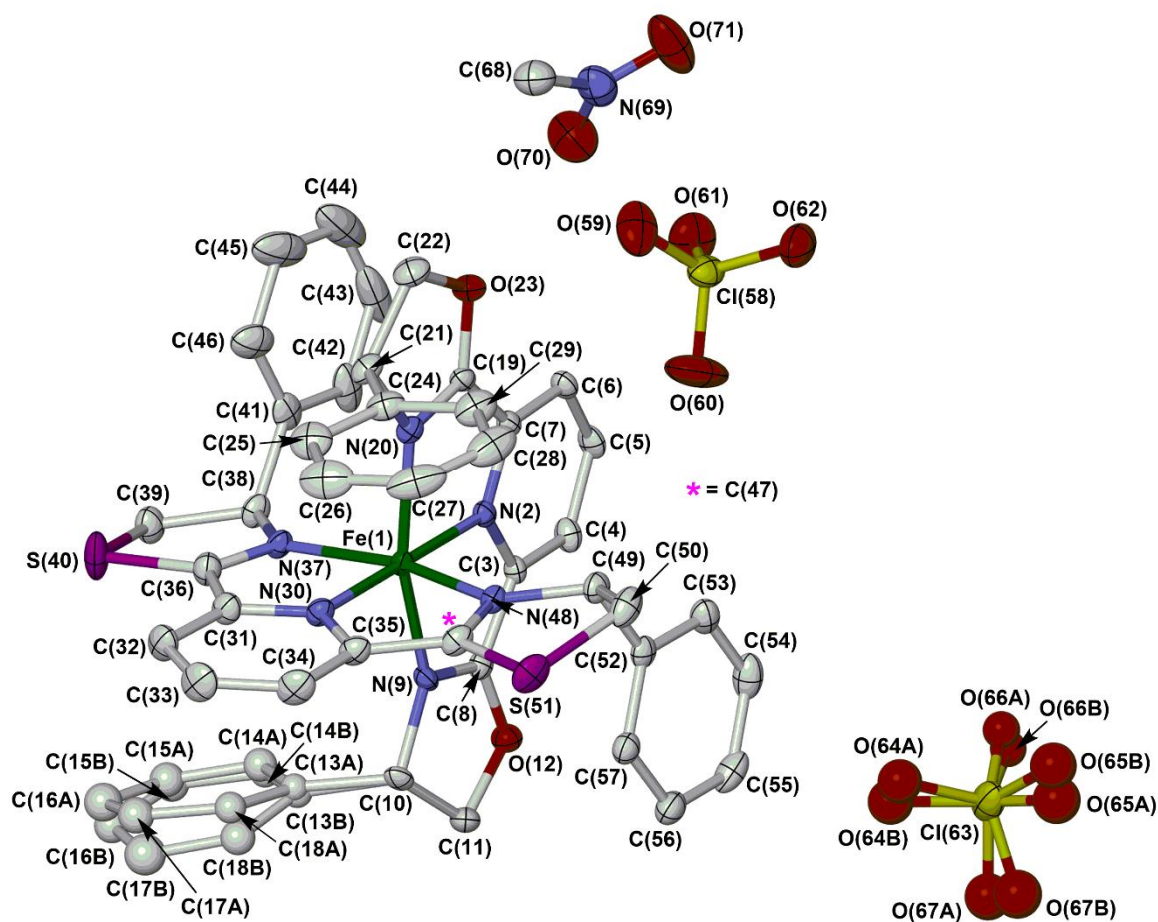

**Figure S1** The asymmetric unit of 1·MeNO<sub>2</sub>, showing the full atom numbering scheme. Both orientations of the disordered residues in the model are included in the Figure. Displacement ellipsoids are at the 50 % probability level, and H atoms are omitted for clarity. Colour code: C, white; Cl, yellow; Fe, green; N, blue; O, red; S, purple.

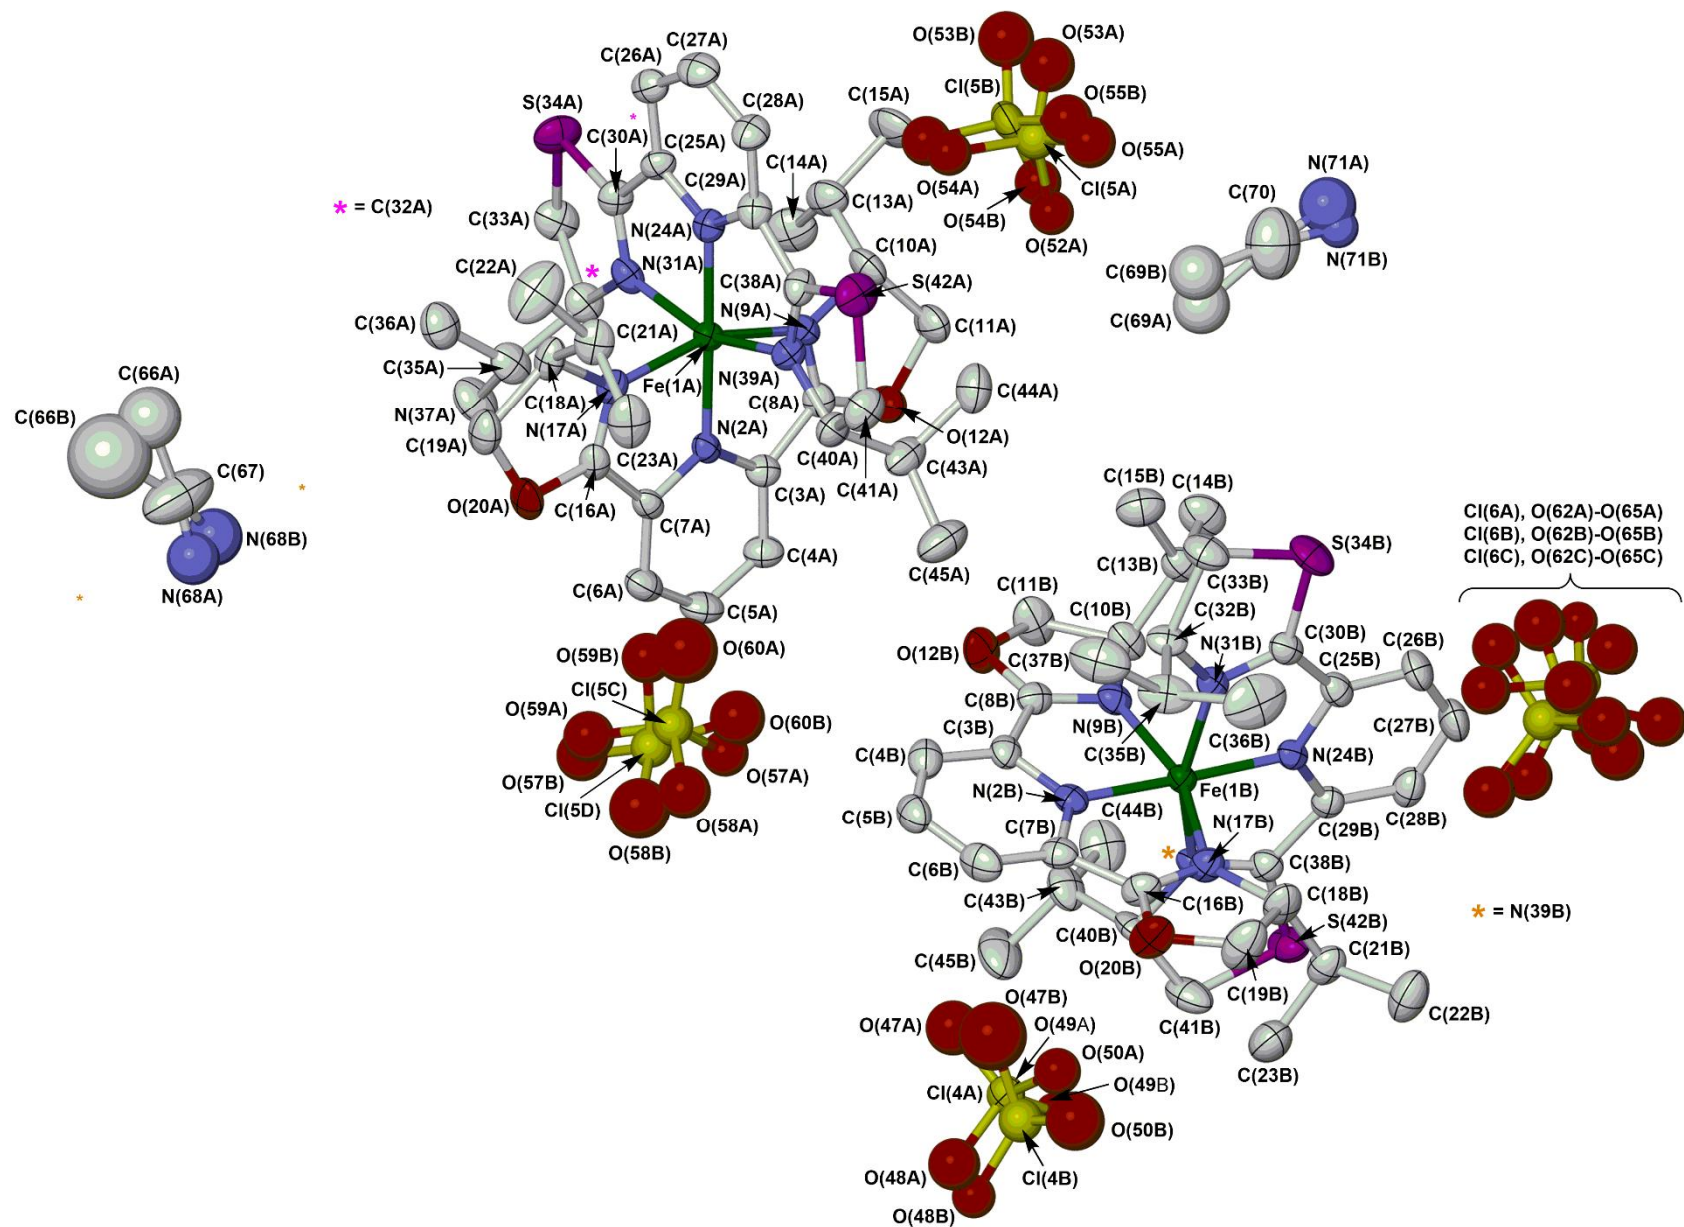

**Figure S2** The asymmetric unit of 2-McCN. Details as for Figure S1. Colour code: C, white; Cl, yellow; Fe, green; N, blue; O, red; S, purple.

**Table S2** Selected bond lengths, angles and other structural parameters ( $\text{\AA}$ ,  $^\circ$ ,  $\text{\AA}^3$ ) for the heterochiral  $[\text{Fe}(L^1R)(L^2R)][\text{ClO}_4]_2$  crystals. See Figures S1 and S2 for the atom numbering scheme, while definitions of  $V_{\text{Oh}}$ ,  $\Sigma$ ,  $\Theta$ ,  $\varphi$  and  $\theta$  are given on page S9.

| <b>1·MeNO<sub>2</sub></b> |            | <b>2·MeCN</b>     |            |            |
|---------------------------|------------|-------------------|------------|------------|
|                           |            |                   | Molecule A | Molecule B |
| Fe(1)–N(2)                | 1.915(3)   | Fe(1)–N(2)        | 1.923(5)   | 1.907(5)   |
| Fe(1)–N(9)                | 1.995(3)   | Fe(1)–N(9)        | 1.995(5)   | 2.007(5)   |
| Fe(1)–N(20)               | 1.994(3)   | Fe(1)–N(17)       | 1.999(5)   | 2.000(5)   |
| Fe(1)–N(30)               | 1.884(3)   | Fe(1)–N(24)       | 1.903(5)   | 1.888(5)   |
| Fe(1)–N(37)               | 1.995(3)   | Fe(1)–N(31)       | 2.025(5)   | 2.003(5)   |
| Fe(1)–N(48)               | 1.985(3)   | Fe(1)–N(39)       | 2.014(5)   | 2.008(5)   |
| N(2)–Fe(1)–N(9)           | 79.45(13)  | N(2)–Fe(1)–N(9)   | 78.9(2)    | 79.8(2)    |
| N(2)–Fe(1)–N(20)          | 79.20(13)  | N(2)–Fe(1)–N(17)  | 79.3(2)    | 79.2(2)    |
| N(2)–Fe(1)–N(30)          | 179.49(15) | N(2)–Fe(1)–N(24)  | 178.5(2)   | 177.2(2)   |
| N(2)–Fe(1)–N(37)          | 99.73(12)  | N(2)–Fe(1)–N(31)  | 100.7(2)   | 97.3(2)    |
| N(2)–Fe(1)–N(48)          | 100.81(12) | N(2)–Fe(1)–N(39)  | 100.4(2)   | 103.5(2)   |
| N(9)–Fe(1)–N(20)          | 158.64(12) | N(9)–Fe(1)–N(17)  | 158.2(2)   | 159.0(2)   |
| N(9)–Fe(1)–N(30)          | 100.20(13) | N(9)–Fe(1)–N(24)  | 102.6(2)   | 100.5(2)   |
| N(9)–Fe(1)–N(37)          | 90.65(12)  | N(9)–Fe(1)–N(31)  | 92.7(2)    | 90.3(2)    |
| N(9)–Fe(1)–N(48)          | 93.43(12)  | N(9)–Fe(1)–N(39)  | 92.3(2)    | 93.0(2)    |
| N(20)–Fe(1)–N(30)         | 101.15(13) | N(17)–Fe(1)–N(24) | 99.3(2)    | 100.5(2)   |
| N(20)–Fe(1)–N(37)         | 92.95(12)  | N(17)–Fe(1)–N(31) | 91.4(2)    | 92.2(2)    |
| N(20)–Fe(1)–N(48)         | 90.56(13)  | N(17)–Fe(1)–N(39) | 91.6(2)    | 92.1(2)    |
| N(30)–Fe(1)–N(37)         | 79.90(13)  | N(24)–Fe(1)–N(31) | 79.4(2)    | 79.9(2)    |
| N(30)–Fe(1)–N(48)         | 79.57(13)  | N(24)–Fe(1)–N(39) | 79.4(2)    | 79.3(2)    |
| N(37)–Fe(1)–N(48)         | 159.46(13) | N(31)–Fe(1)–N(39) | 158.8(2)   | 159.2(2)   |
| $V_{\text{Oh}}$           | 9.720(10)  | $V_{\text{Oh}}$   | 9.928(16)  | 9.819(16)  |
| $\Sigma$                  | 91.4(5)    | $\Sigma$          | 94.0(7)    | 91.2(7)    |
| $\Theta$                  | 300        | $\Theta$          | 308        | 300        |
| $\varphi$                 | 179.49(15) | $\varphi$         | 178.5(2)   | 177.2(2)   |
| $\theta$                  | 89.67(6)   | $\theta$          | 88.81(9)   | 87.08(9)   |

1·MeNO<sub>2</sub>

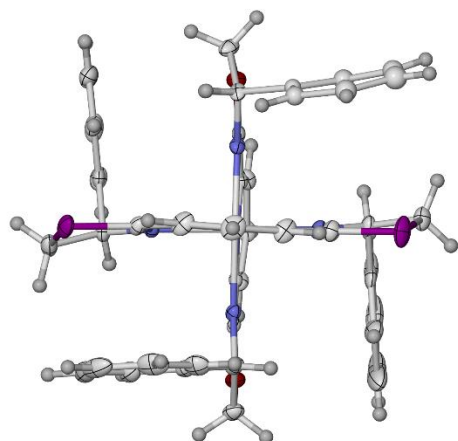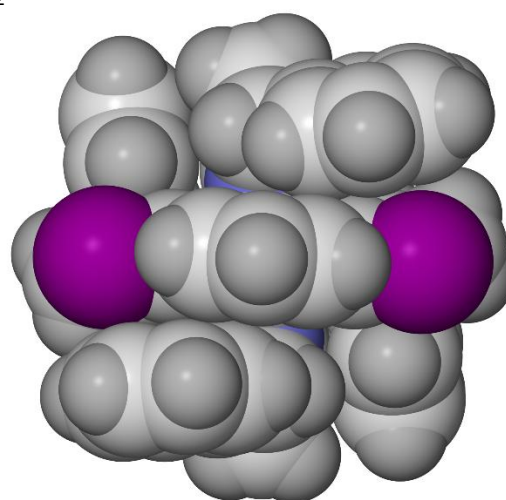

2·MeCN, molecule A

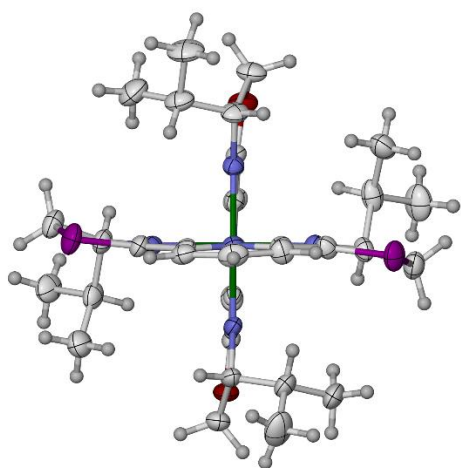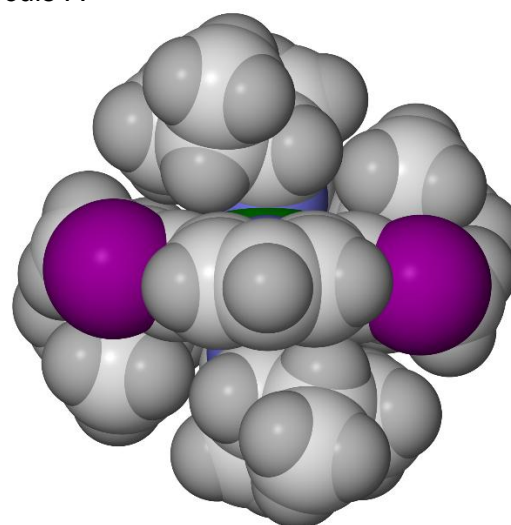

2·MeCN, molecule B

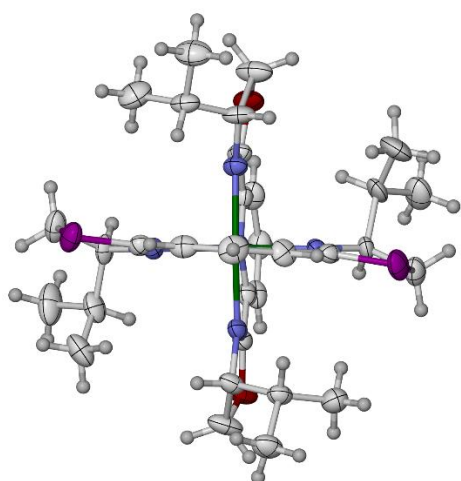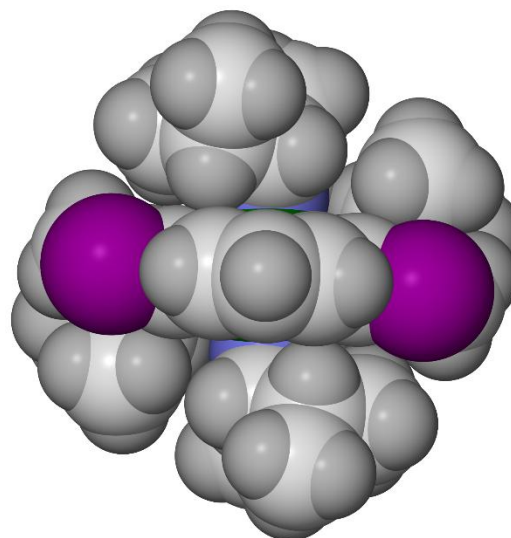

**Figure S3** Displacement ellipsoid (left) and space-filling plots (right) of the heterochiral  $[\text{Fe}(\text{L}^1\text{R})(\text{L}^2\text{R})]^{2+}$  complex cations in the crystals of **1** and **2**. The view is down the Fe–N{pyridyl} bond to the  $\text{L}^2\text{R}$  ligand.

Only one orientation of the disordered phenyl group in **1** is shown in the Figure. The  $\text{L}^1\text{R}$  and  $\text{L}^2\text{R}$  ligands in **1** and **2** have opposite chirality.

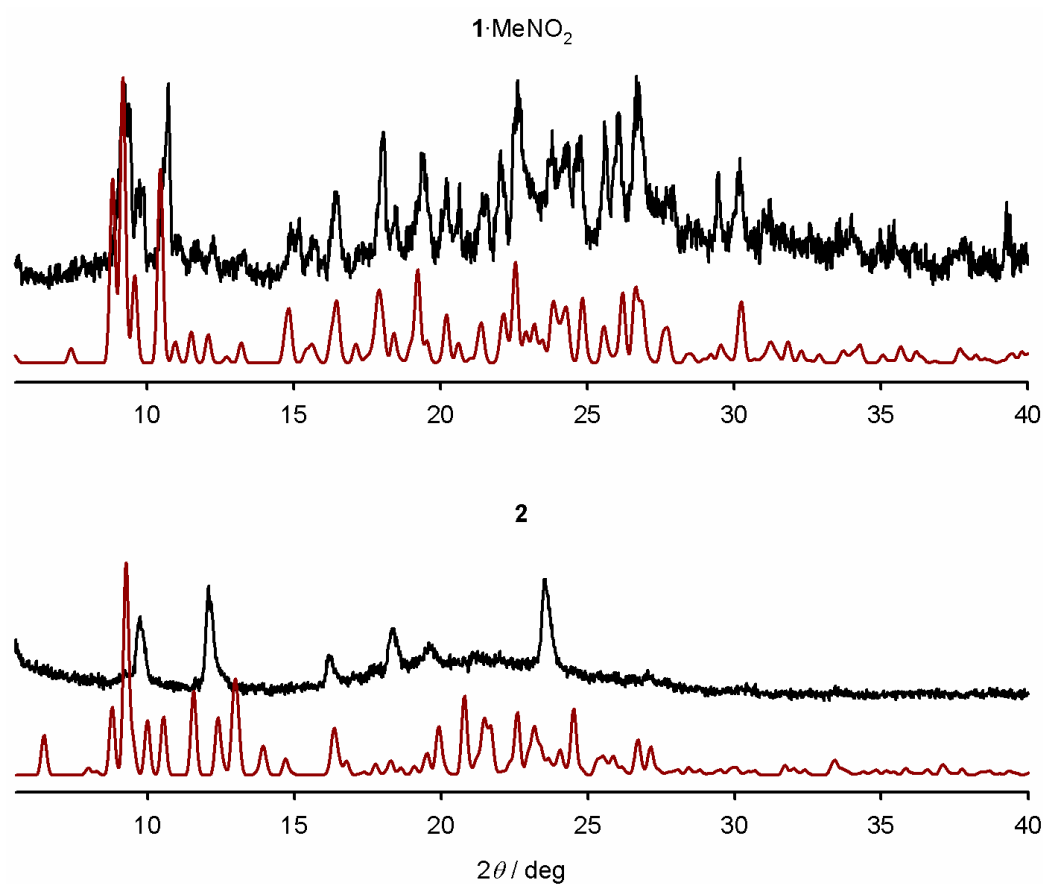

**Figure S4** Room temperature X-ray powder diffraction data for  $1 \cdot \text{MeNO}_2$  (top) and **2** (bottom). The measured powder patterns are shown in black, and crystallographic simulations are shown in red.

Although the diffraction is weak and the peaks are broadened, the powder pattern of  $1 \cdot \text{MeNO}_2$  agrees well with the simulation. However, **2** shows just a few peaks which do not match the simulation, and a broad amorphous hump around  $2\theta = 22^\circ$ . Hence, solvent loss from  $2 \cdot \text{MeCN}$  on exposure to air leads to decomposition of its crystal lattice.

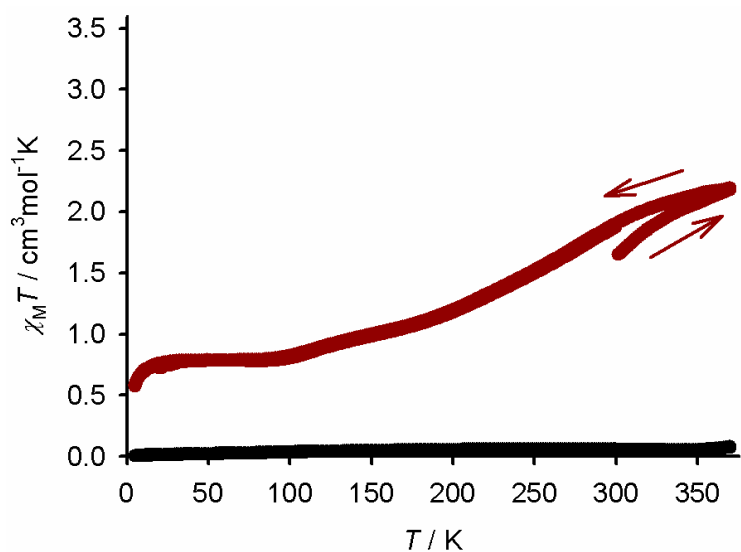

**Figure S5** Magnetic susceptibility data for **1**·MeNO<sub>2</sub> (black) and **2** (red). Data were measured with a 300→370→5→300 K temperature cycle at a scan rate 5 K min<sup>-1</sup>.

The low-spin nature of **1** is consistent with its homoleptic counterparts [Fe(*R*)-*L*<sup>1</sup>Ph)(*S*)-*L*<sup>1</sup>Ph)][ClO<sub>4</sub>]<sub>2</sub> and [Fe(*R*)-*L*<sup>2</sup>Ph)(*S*)-*L*<sup>2</sup>Ph)][ClO<sub>4</sub>]<sub>2</sub>, which are also low-spin in the solid state.<sup>2,4</sup>

Compound **2** has a mixed spin-state population at room temperature, and exhibits an almost continuous gradual SCO on heating and re-cooling. The SCO is incomplete at 80 K and, is quenched at lower temperatures where the residual high-spin population is frozen into the sample.

The ill-defined spin state properties and gradual SCO in **2** are consistent with its poorly crystalline and partially amorphous composition (Figure S4), while the small changes observed during the initial heating and recooling probably reflect loss of a small quantity of residual solvent.<sup>21</sup>



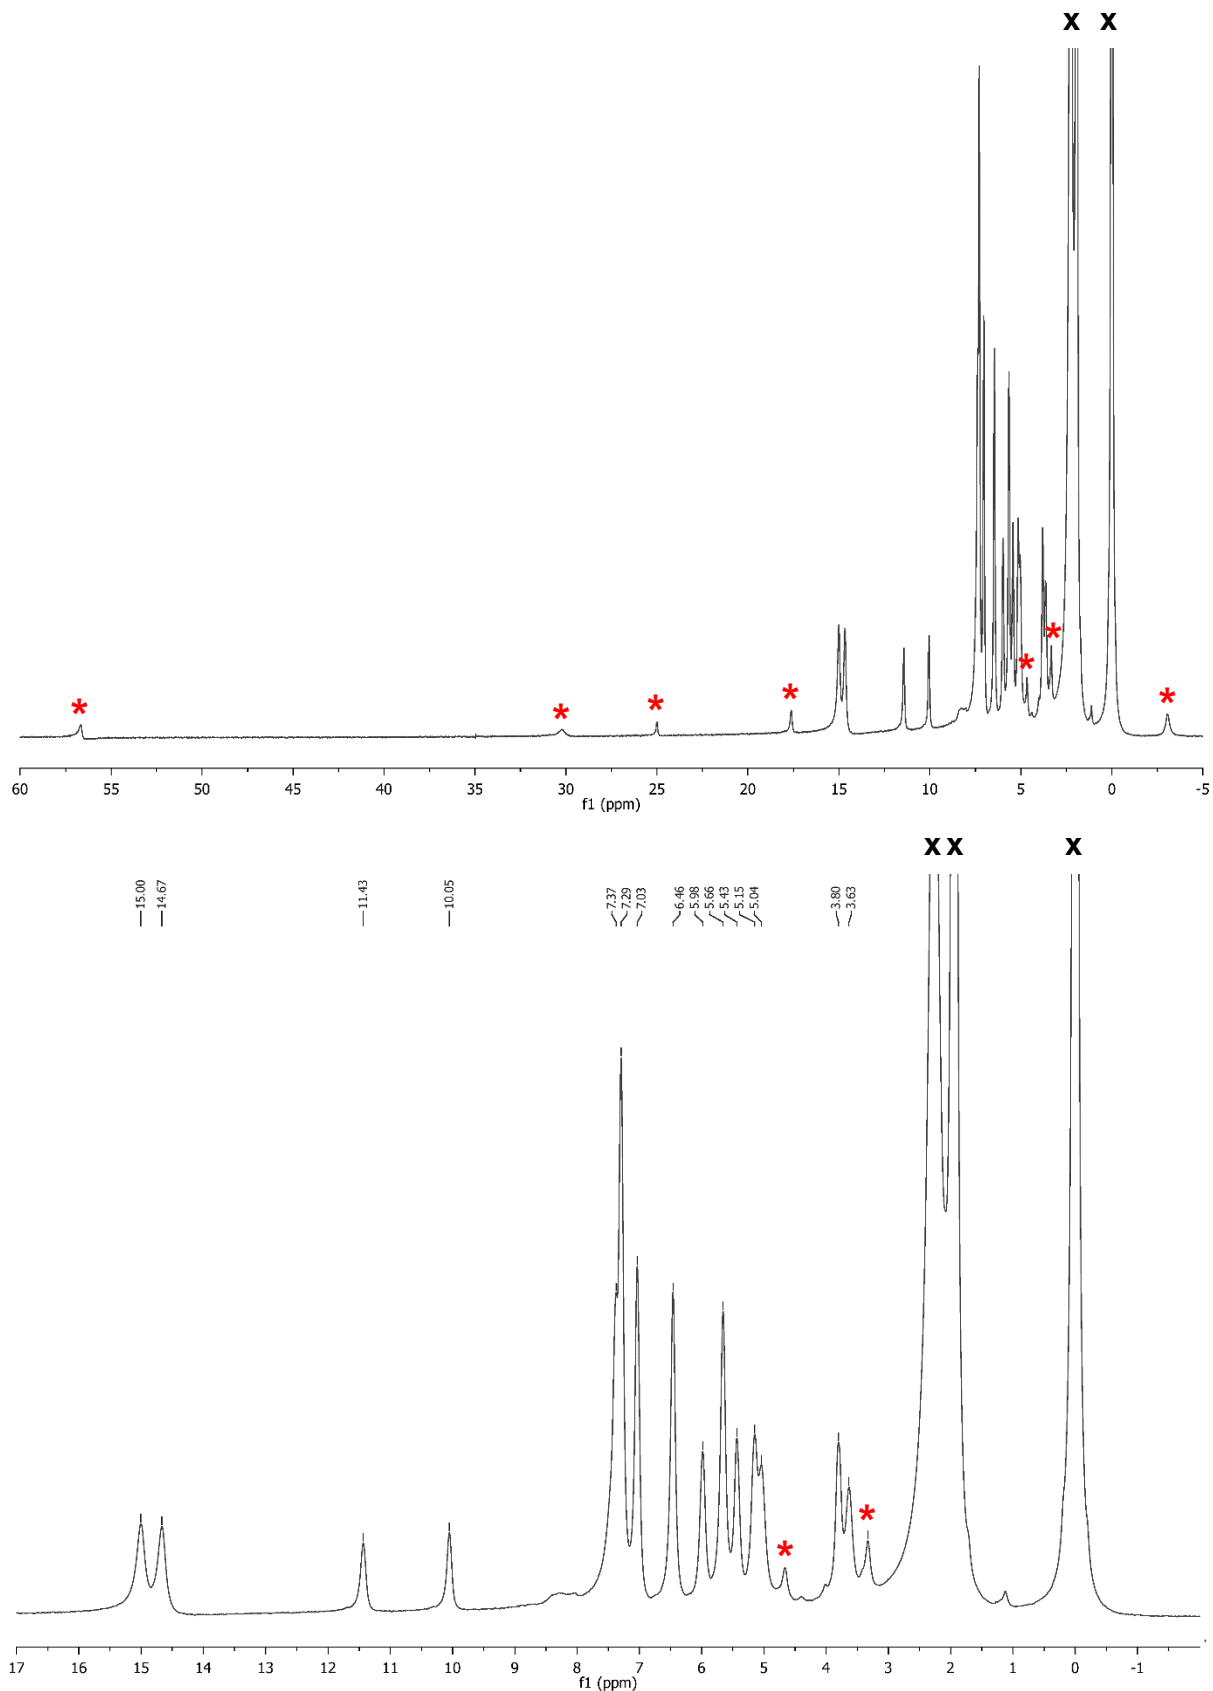

**Figure S6** <sup>1</sup>H NMR spectrum of preformed **1** (CD<sub>3</sub>CN). Top: full paramagnetic range. Bottom: expansion of the main peaks assigned to the heteroleptic complex **1**.

A molecule of **1** has 38 protons in 16 unique environments, which are all resolved in the spectrum. The weak contact shifting of the peaks is consistent with its magnetic measurements, which show only a small paramagnetism of  $\chi_M T = 0.8 \text{ cm}^3 \text{ mol}^{-1} \text{ K}$  at room temperature (Figure 3, main article). The starred peaks are from  $[\text{Fe}((R)\text{-}L^1\text{Ph})_2]^{2+}$ ,<sup>4</sup> which is present in a ratio of *ca* 0.15:1 compared to the main species.

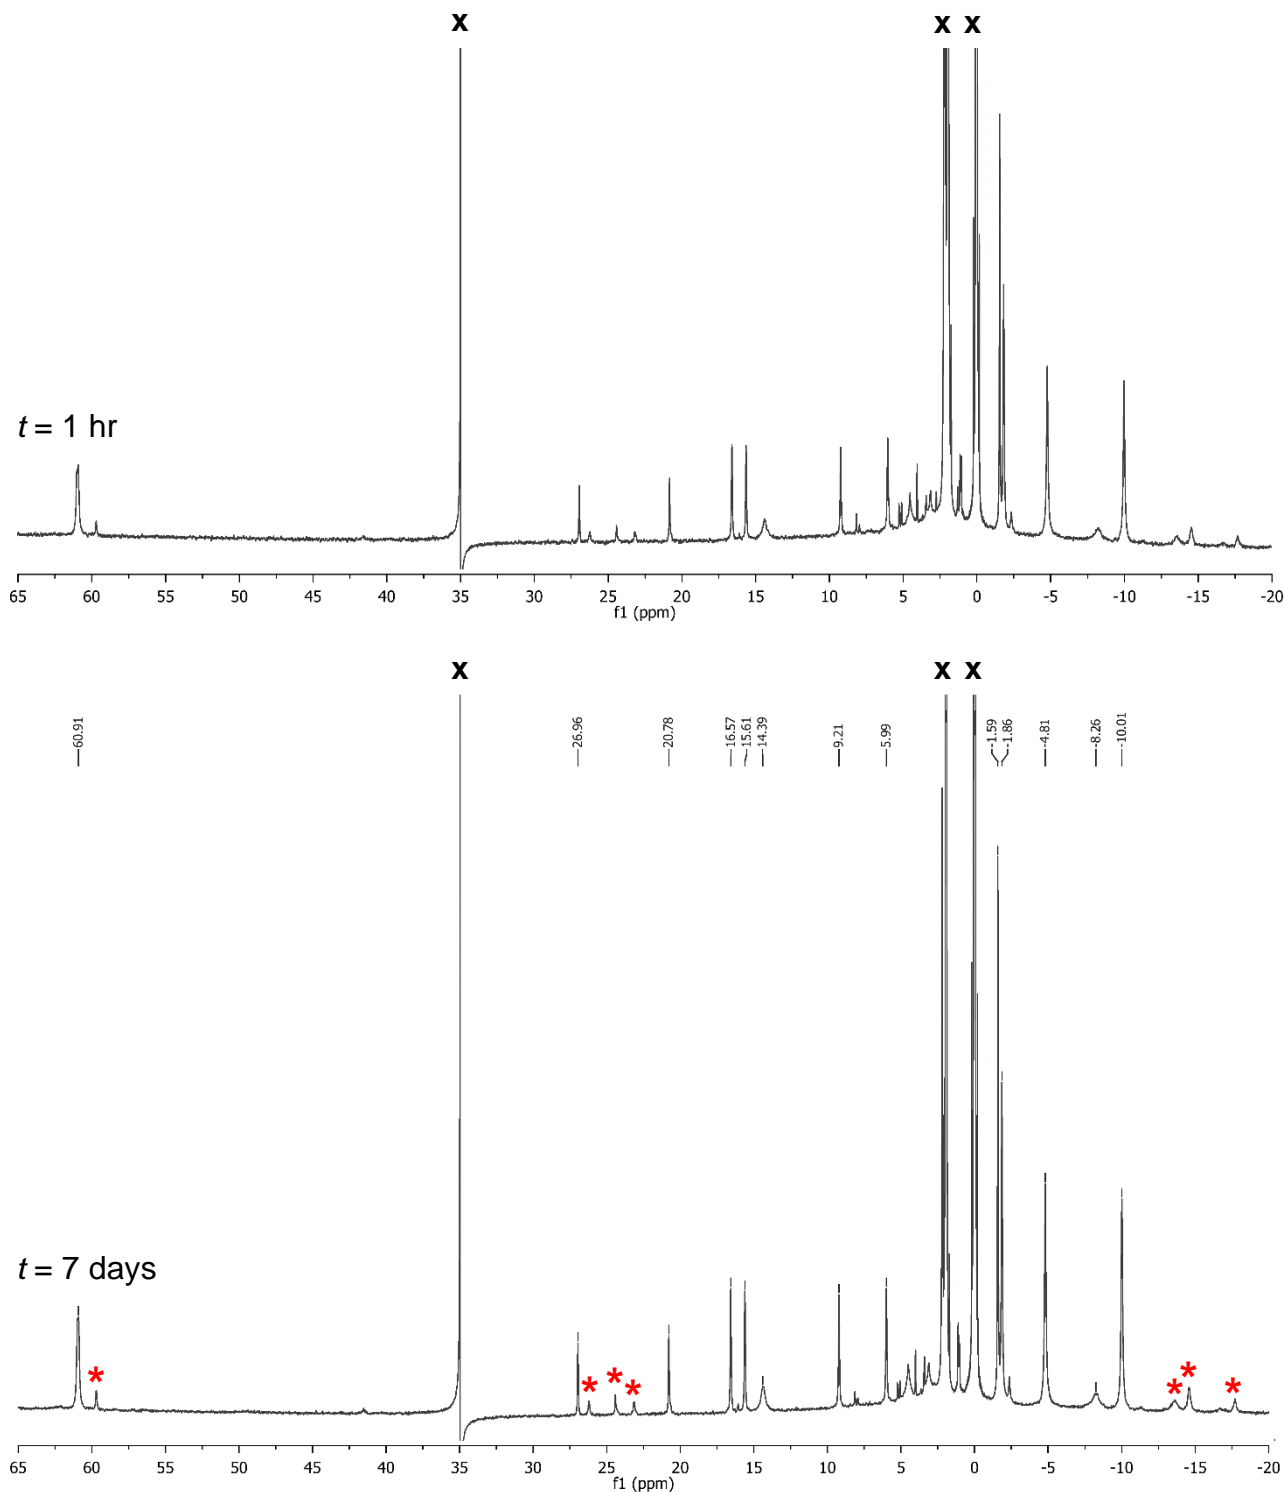

**Figure S7**  $^1\text{H}$  NMR spectrum of **2** ( $\text{CD}_3\text{CN}$ ) upon time of mixing (top), and after 7 days (bottom). The feature at 35 ppm is a spectrometer artefact.

In contrast to **1** (Figure 2, main article) there is no change in the composition of the solution over this time.

A molecule of **2** has 46 protons in 16 unique environments, including diastereotopic *isopropyl* groups. The marked peaks in the spectrum correspond to 44 of those H atoms. One more resonance of integral 2H is expected upfield of 2 ppm, from an *isopropyl CH* environment, but this could be masked by the solvent peaks. The strongly contact shifted peaks in the spectrum are consistent with its being predominantly high-spin at 298 K from magnetic measurements (Figure 3, main article).

The starred peaks are from  $[\text{Fe}((R)\text{-}L^1i\text{Pr})_2]^{2+}$ ,<sup>4</sup> in a ratio of *ca* 0.15:1 compared to the main species. Extra peaks of similar integral in the diamagnetic region may be from uncoordinated  $L^2i\text{Pr}$ .

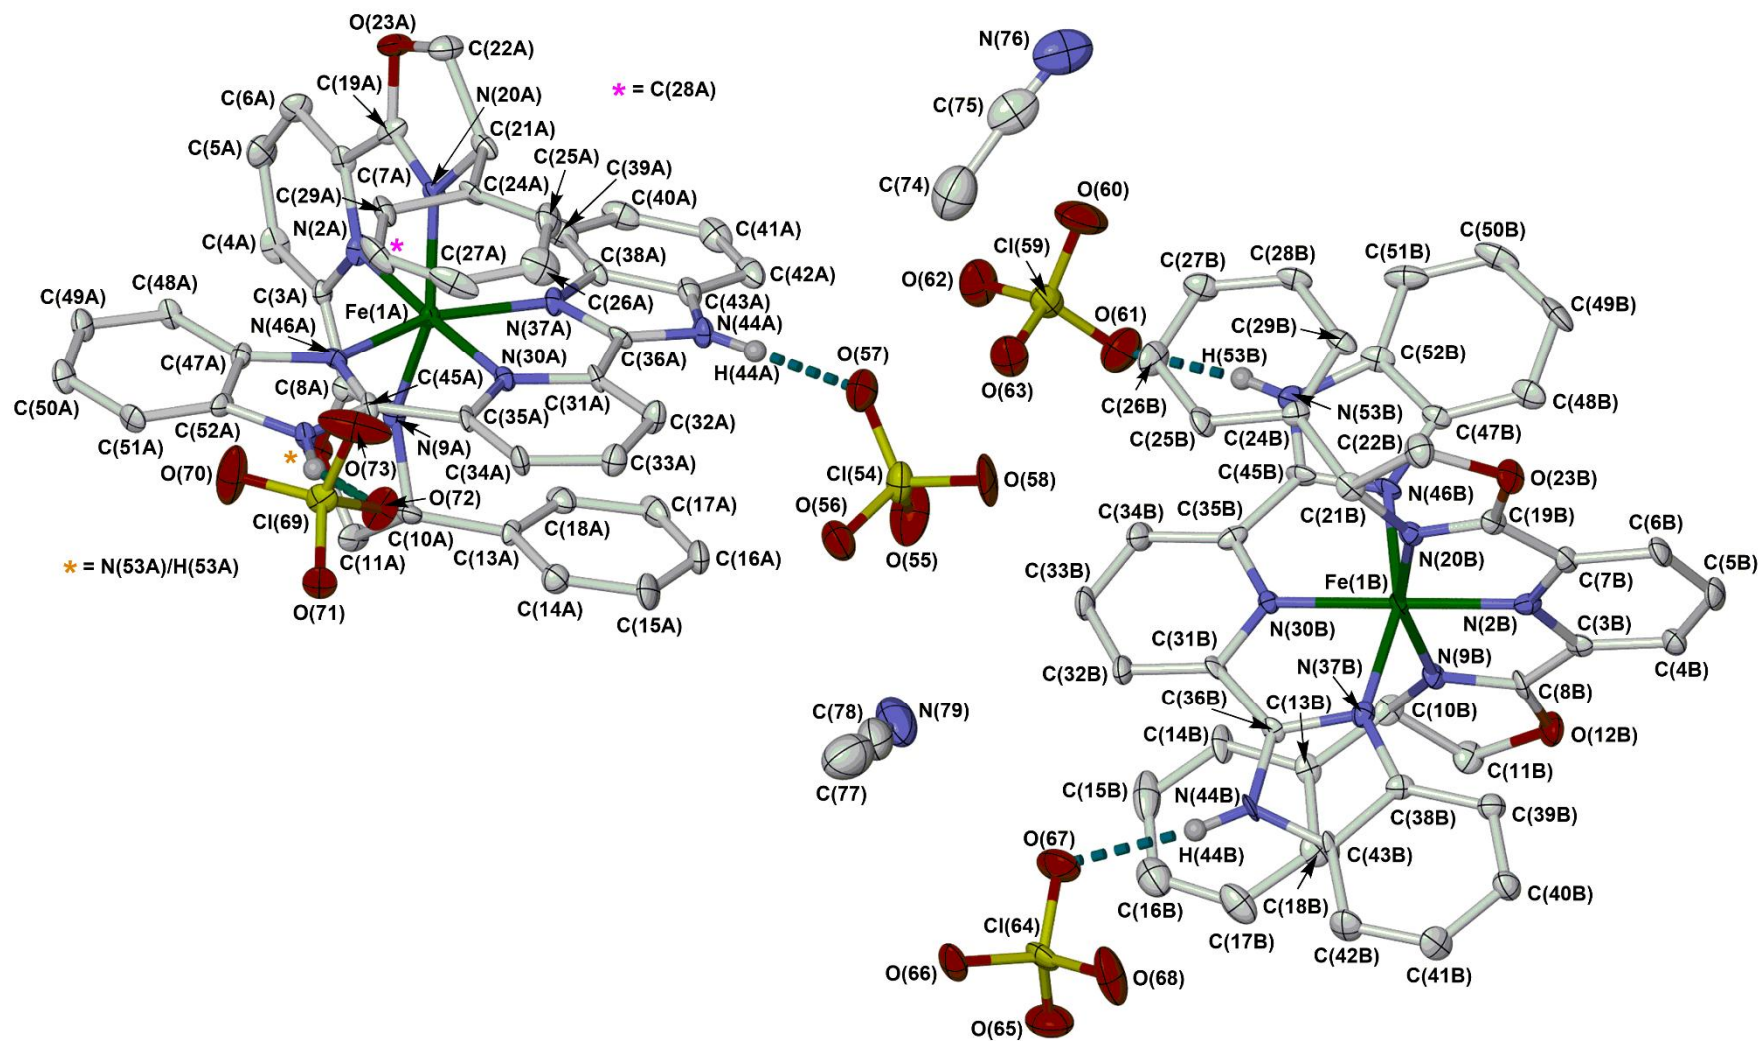

**Figure S8** The asymmetric unit of **3**·MeCN. Details as for Figure S1. Colour code: C, white; H, pale grey; Cl, yellow; Fe, green; N, blue; O, red.

Atom O(12A) is behind N(53A).

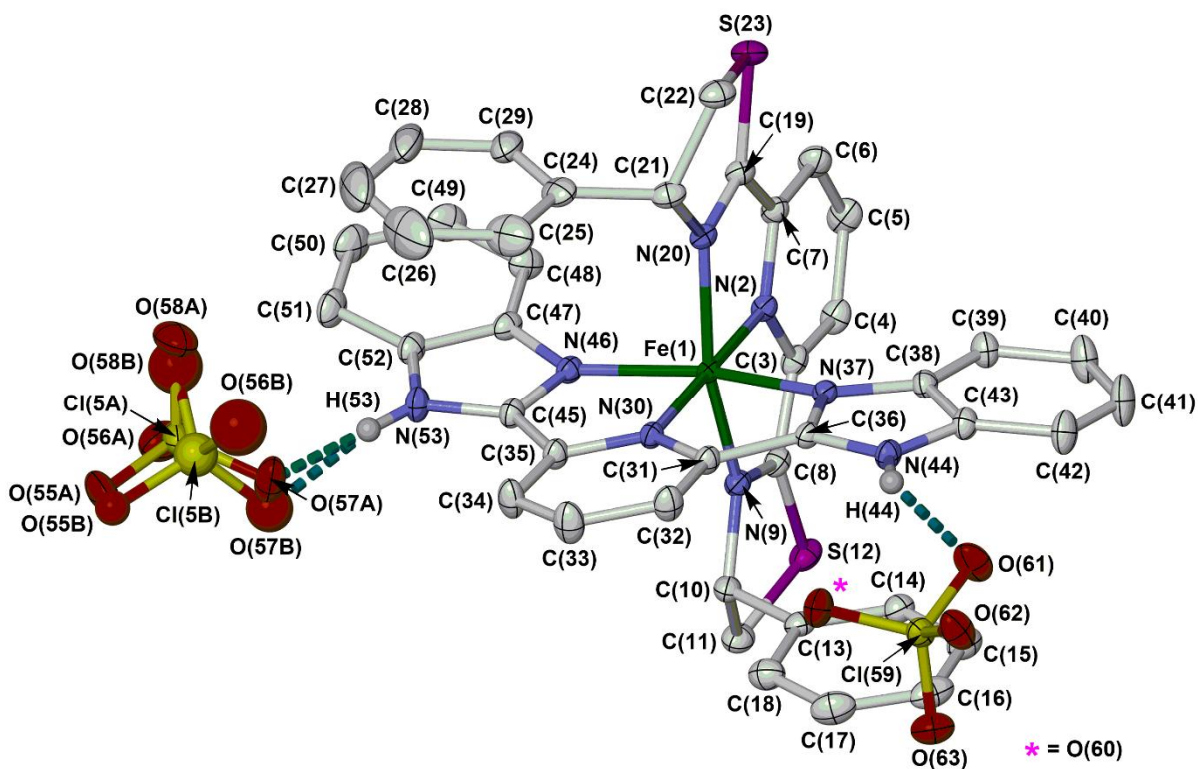

**Figure S9** The asymmetric unit of **4**. Details as for Figure S1. Colour code: C, white; H, pale grey; Cl, yellow; Fe, green; N, blue; O, red; S, purple.

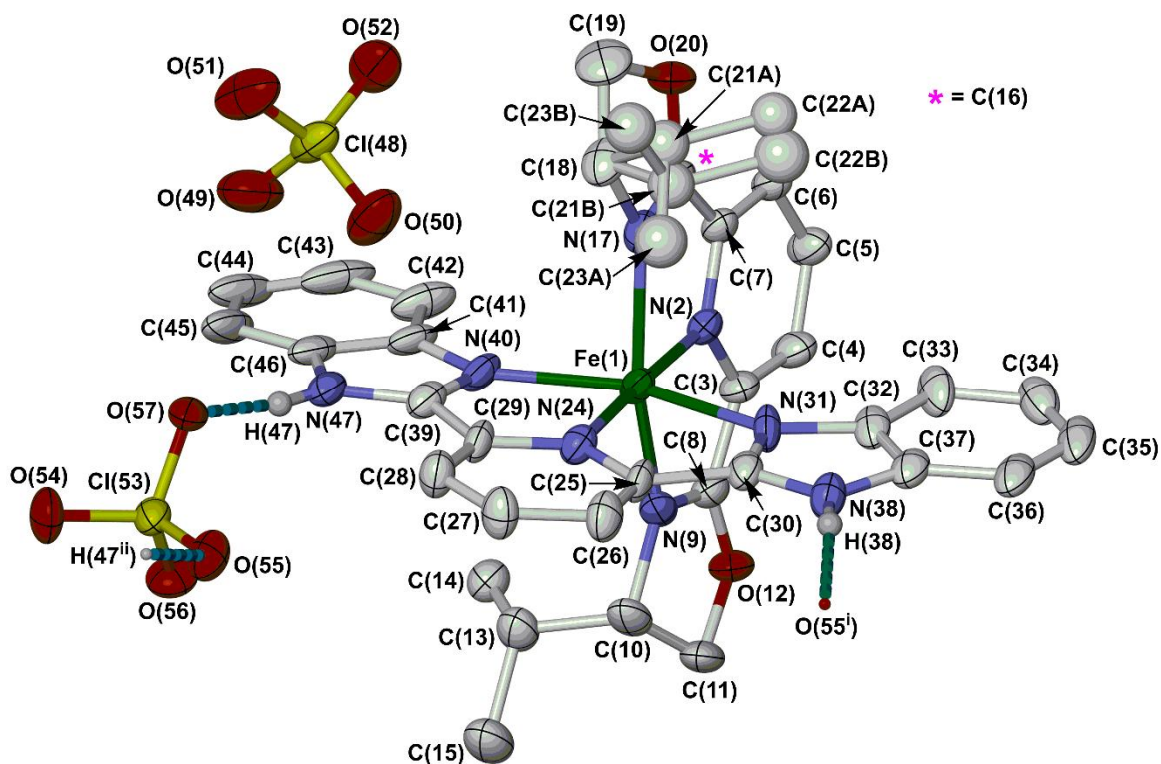

**Figure S10** The asymmetric unit of **5**. Details as for Figure S1. Colour code: C, white; H, pale grey; Cl, yellow; Fe, green; N, blue; O, red. Symmetry codes: (i)  $-1/2+x, 1/2-y, 1-z$ ; (ii)  $1/2+x, 1/2-y, 1-z$ .

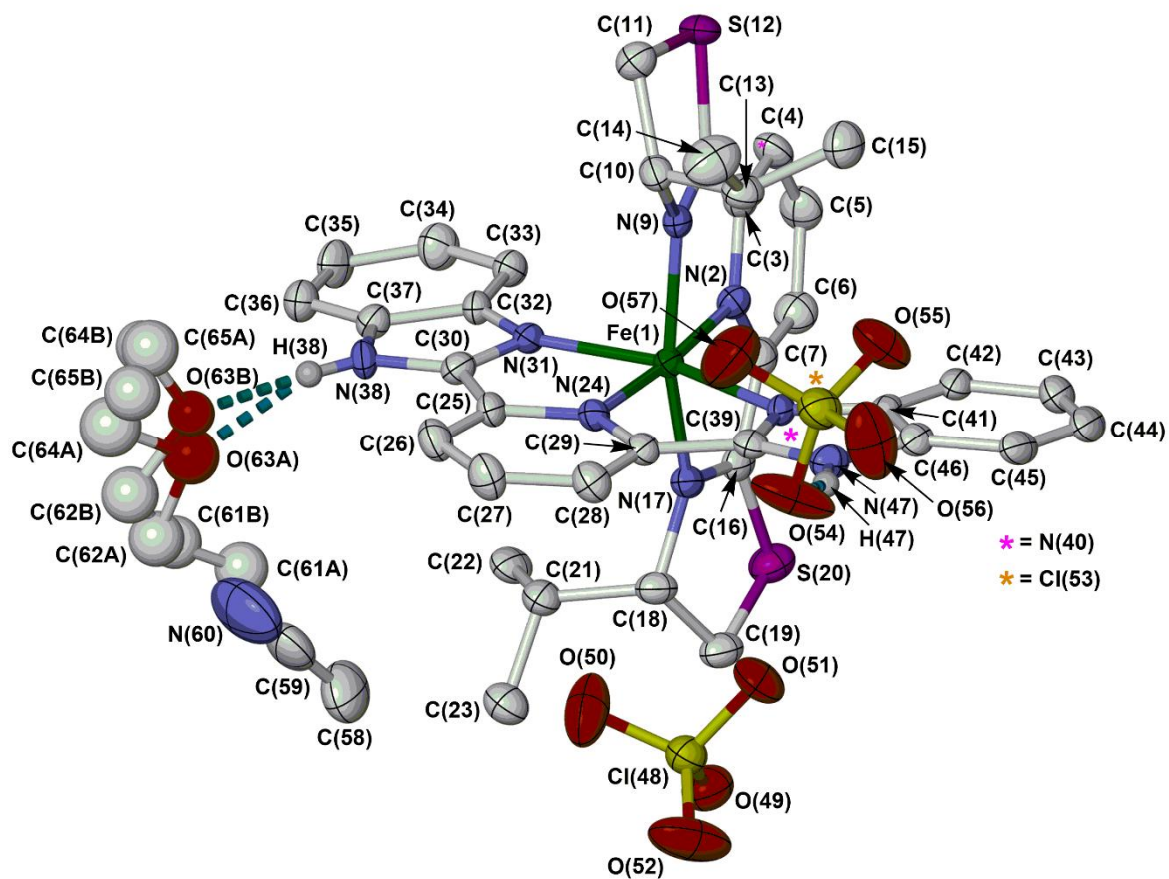

**Figure S11** The asymmetric unit of 6·MeCN·Et<sub>2</sub>O. Details as for Figure S1. Colour code: C, white; H, pale grey; Cl, yellow; Fe, green; N, blue; O, red; S, purple.

Atom C(8) is obscured behind C(14).

**Table S3** Selected bond lengths, angles and other structural parameters ( $\text{\AA}$ ,  $^\circ$ ,  $\text{\AA}^3$ ) for the  $[\text{Fe}(L^1\text{R})(\text{bimpy})][\text{ClO}_4]_2$  and  $[\text{Fe}(L^2\text{R})(\text{bimpy})][\text{ClO}_4]_2$  crystals. See Figures S8-S11 for the atom numbering scheme, while definitions of  $V_{\text{Oh}}$ ,  $\Sigma$ ,  $\Theta$ ,  $\varphi$  and  $\theta$  are given on page S9.

|                   | 3·MeCN     |            | 4          | 5                 | 6·MeCN·Et <sub>2</sub> O |           |
|-------------------|------------|------------|------------|-------------------|--------------------------|-----------|
|                   | Molecule A | Molecule B |            |                   |                          |           |
| Fe(1)–N(2)        | 1.900(8)   | 1.900(8)   | 1.8795(13) | Fe(1)–N(2)        | 2.024(6)                 | 1.881(5)  |
| Fe(1)–N(9)        | 1.983(8)   | 1.971(8)   | 1.9739(14) | Fe(1)–N(9)        | 2.076(8)                 | 1.995(5)  |
| Fe(1)–N(20)       | 1.979(7)   | 1.978(8)   | 1.9574(13) | Fe(1)–N(17)       | 2.094(8)                 | 2.001(6)  |
| Fe(1)–N(30)       | 1.934(8)   | 1.934(8)   | 1.9322(13) | Fe(1)–N(24)       | 2.029(7)                 | 1.913(5)  |
| Fe(1)–N(37)       | 2.035(8)   | 1.992(8)   | 1.9813(13) | Fe(1)–N(31)       | 2.118(7)                 | 1.992(5)  |
| Fe(1)–N(46)       | 2.006(8)   | 2.027(8)   | 1.9937(13) | Fe(1)–N(40)       | 2.110(7)                 | 1.983(5)  |
| N(2)–Fe(1)–N(9)   | 79.4(3)    | 80.3(3)    | 80.14(6)   | N(2)–Fe(1)–N(9)   | 76.5(3)                  | 80.4(2)   |
| N(2)–Fe(1)–N(20)  | 79.5(3)    | 79.3(3)    | 79.63(6)   | N(2)–Fe(1)–N(17)  | 76.4(3)                  | 79.8(2)   |
| N(2)–Fe(1)–N(30)  | 177.8(4)   | 178.0(4)   | 179.60(6)  | N(2)–Fe(1)–N(24)  | 176.2(3)                 | 175.2(2)  |
| N(2)–Fe(1)–N(37)  | 99.1(3)    | 101.5(3)   | 100.13(6)  | N(2)–Fe(1)–N(31)  | 99.1(3)                  | 96.1(2)   |
| N(2)–Fe(1)–N(46)  | 102.1(3)   | 98.9(3)    | 100.61(6)  | N(2)–Fe(1)–N(40)  | 107.3(3)                 | 103.7(2)  |
| N(9)–Fe(1)–N(20)  | 158.7(3)   | 159.6(3)   | 159.70(6)  | N(9)–Fe(1)–N(17)  | 152.7(3)                 | 160.1(2)  |
| N(9)–Fe(1)–N(30)  | 102.6(3)   | 98.1(3)    | 100.08(6)  | N(9)–Fe(1)–N(24)  | 104.5(3)                 | 96.3(2)   |
| N(9)–Fe(1)–N(37)  | 92.4(3)    | 91.7(3)    | 92.27(5)   | N(9)–Fe(1)–N(31)  | 89.3(3)                  | 90.7(2)   |
| N(9)–Fe(1)–N(46)  | 90.2(3)    | 91.3(3)    | 93.19(6)   | N(9)–Fe(1)–N(40)  | 97.0(3)                  | 93.3(2)   |
| N(20)–Fe(1)–N(30) | 98.6(3)    | 102.3(3)   | 100.14(5)  | N(17)–Fe(1)–N(24) | 102.7(3)                 | 103.5(2)  |
| N(20)–Fe(1)–N(37) | 92.7(3)    | 90.7(3)    | 89.61(5)   | N(17)–Fe(1)–N(31) | 98.1(3)                  | 93.2(2)   |
| N(20)–Fe(1)–N(46) | 92.5(3)    | 93.4(3)    | 92.18(6)   | N(17)–Fe(1)–N(40) | 88.1(3)                  | 89.7(2)   |
| N(30)–Fe(1)–N(37) | 79.9(3)    | 79.7(3)    | 79.54(5)   | N(24)–Fe(1)–N(31) | 77.2(3)                  | 80.3(2)   |
| N(30)–Fe(1)–N(46) | 78.9(3)    | 80.0(3)    | 79.72(5)   | N(24)–Fe(1)–N(40) | 76.3(3)                  | 79.9(2)   |
| N(37)–Fe(1)–N(46) | 158.7(3)   | 159.7(3)   | 159.17(5)  | N(31)–Fe(1)–N(40) | 153.5(3)                 | 160.2(2)  |
| $V_{\text{Oh}}$   | 9.88(2)    | 9.82(2)    | 9.611(4)   | $V_{\text{Oh}}$   | 11.22(2)                 | 9.725(16) |
| $\Sigma$          | 92.5(10)   | 88.6(10)   | 90.0(3)    | $\Sigma$          | 124.9(10)                | 86.7(7)   |
| $\Theta$          | 305        | 291        | 293        | $\Theta$          | 393                      | 284       |
| $\varphi$         | 177.8(4)   | 178.0(4)   | 179.60(6)  | $\varphi$         | 176.2(3)                 | 175.2(2)  |
| $\theta$          | 88.21(14)  | 88.01(13)  | 88.00(3)   | $\theta$          | 82.44(12)                | 85.11(8)  |

**Table S4** Hydrogen bond parameters for the bimpy complexes **3-6** [Å, °]. See Figures S8-S11 for the atom numbering scheme. Symmetry codes: (i)  $-1/2+x, 1/2-y, 1-z$ .

|                                   | D–H  | H···A     | D···A               | D–H···A     |
|-----------------------------------|------|-----------|---------------------|-------------|
| <b>3·MeCN</b>                     |      |           |                     |             |
| N(44A)–H(44A)···O(57)             | 0.88 | 2.01      | 2.875(12)           | 168.7       |
| N(53A)–H(53A)···O(72)             | 0.88 | 2.10      | 2.928(11)           | 156.5       |
| N(44B)–H(44B)···O(67)             | 0.88 | 2.27      | 3.056(12)           | 149.1       |
| N(53B)–H(53B)···O(61)             | 0.88 | 2.00      | 2.871(12)           | 172.1       |
| <b>4</b>                          |      |           |                     |             |
| N(44)–H(44)···O(61)               | 0.88 | 2.02      | 2.7954(19)          | 146.0       |
| N(53)–H(53)···O(57A)/O(57B)       | 0.88 | 1.93/1.97 | 2.807(3)/2.84(3)    | 172.5/170.0 |
| <b>5</b>                          |      |           |                     |             |
| N(38)–H(38)···O(55 <sup>i</sup> ) | 0.88 | 1.96      | 2.835(10)           | 172.2       |
| N(47)–H(47)···O(57)               | 0.88 | 2.07      | 2.928(11)           | 165.4       |
| <b>6·MeCN</b>                     |      |           |                     |             |
| N(38)–H(38)···O(63A)/O(63B)       | 0.86 | 1.99/1.90 | 2.806(16)/2.758(12) | 157.9/176.3 |
| N(47)–H(47)···O(54)               | 0.86 | 1.99      | 2.819(9)            | 162.4       |

**Table S5** Intramolecular  $\pi\cdots\pi$  interaction parameters for **3·MeCN** and **4** [Å, °]. See Figures S8 and S9 for the atom numbering scheme. The *L*<sup>1</sup>Ph phenyl groups in **3·MeCN** overlie the C–N bonds linking the pyridyl and imidazolo rings of the bimpy ligand. In contrast, the phenyl substituents in **4** are stacked above the five membered bimpy imidazolo rings.

|                                                                                                                           | Dihedral angle | Interplanar distance <sup>a</sup> | Horizontal offset <sup>b</sup> |
|---------------------------------------------------------------------------------------------------------------------------|----------------|-----------------------------------|--------------------------------|
| <b>3·MeCN</b>                                                                                                             |                |                                   |                                |
| [C(13A)–C(18A)]···[N(30A)–C(38A), C(43A), N(44A)]<br>[C(24A)–C(29A)]···                                                   | 2.9(5)         | 3.31(3)                           | 0.92                           |
| [N(30A)–C(35A), C(45A)–C(47A), C(52A), N(53A)]<br>[C(13B)–C(18B)]···[N(30B)–C(38B), C(43B), N(44B)]<br>[C(24B)–C(29B)]··· | 4.2(4)         | 3.29(3)                           | 0.63                           |
| [N(30B)–C(35B), C(45B)–C(47B), C(52B), N(53B)]                                                                            | 4.1(5)         | 3.31(3)                           | 0.67                           |
|                                                                                                                           | 1.1(5)         | 3.29(3)                           | 0.91                           |
| <b>4</b>                                                                                                                  |                |                                   |                                |
| [C(13)–C(18)]···[C(36)–C(38), C(43), N(44)]                                                                               | 3.92(6)        | 3.342(6)                          | 0.81                           |
| [C(24)–C(29)]···[C(45)–C(47), C(52), N(53)]                                                                               | 5.54(10)       | 3.491(7)                          | 0.68                           |

<sup>a</sup>This is the average distance between each atom in the interacting phenyl ring, and the least squares plane of the stacked benzimidazolyl group. <sup>b</sup>This is calculated from the centroids of the two interacting residues.

There are no intermolecular  $\pi\cdots\pi$  interactions in the crystals of **3-6**.

3·MeCN, molecule A

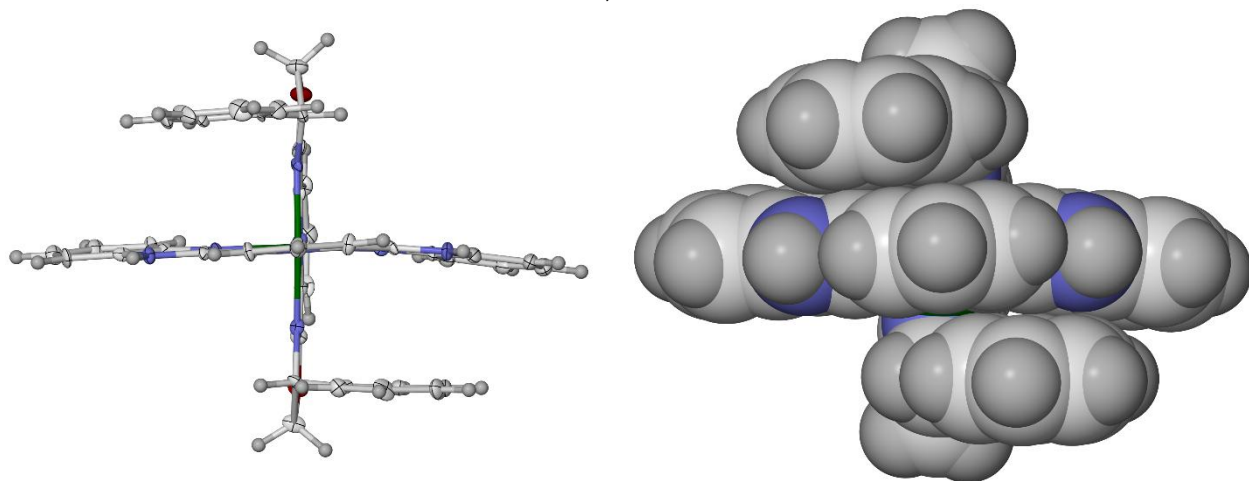

3·MeCN, molecule B

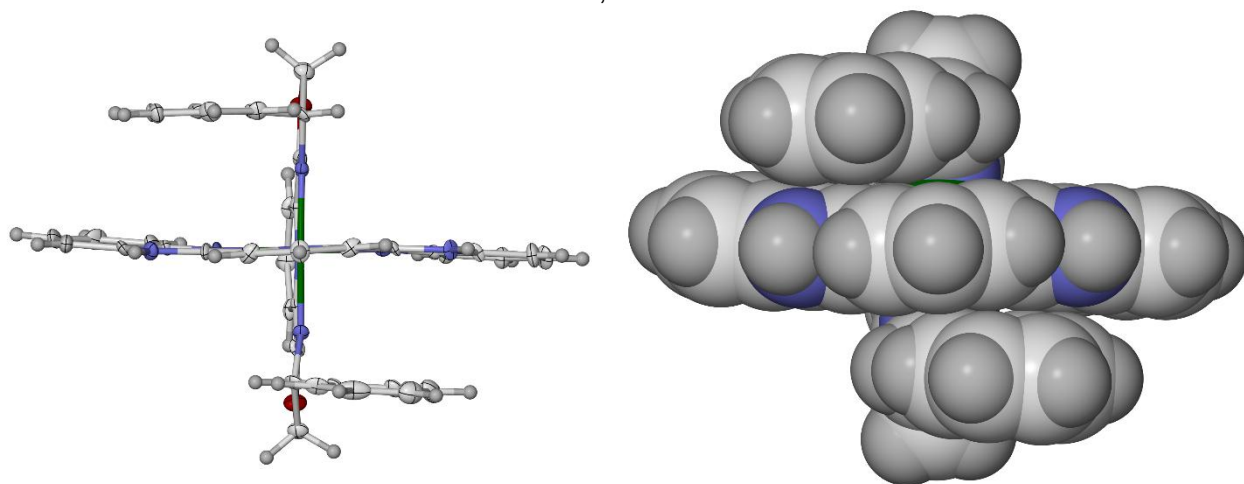

4

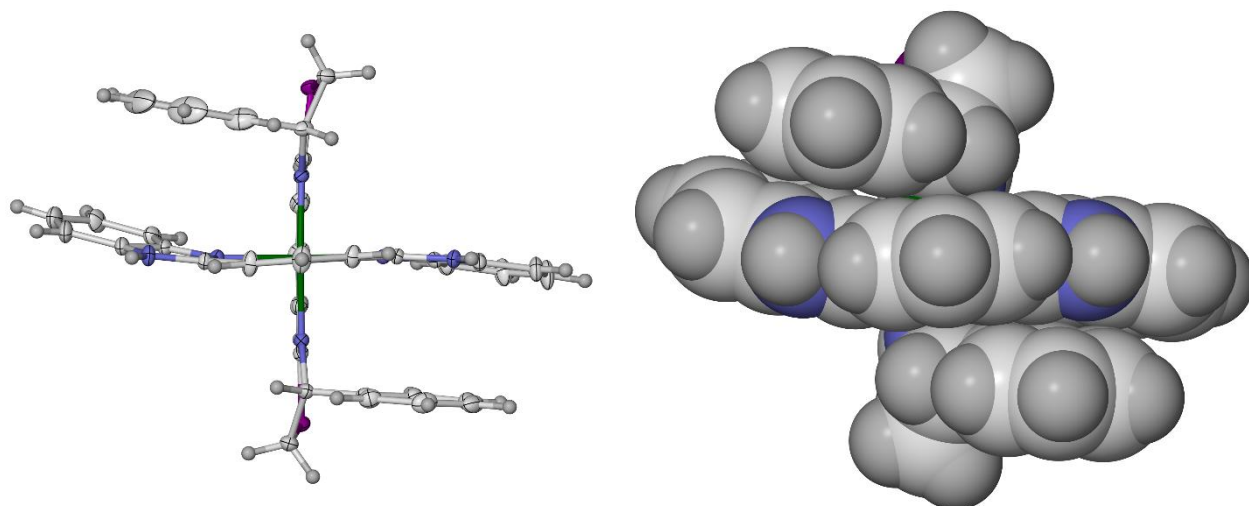

**Figure S12** Displacement ellipsoid plots (left) and space-filling views (right) of the [Fe(L<sup>1</sup>R)(bimpy)]<sup>2+</sup> and [Fe(L<sup>2</sup>R)(bimpy)]<sup>2+</sup> complex cations in the crystals of **3-6**. The view is down the Fe–N{pyridyl} bond to the bimpy ligand, which highlights the bimpy ligand conformation and its interactions with the L<sup>1</sup>R and L<sup>2</sup>R ‘R’ substituents.

Only one orientation of the disordered *isopropyl* group in **5** is shown in the Figure.



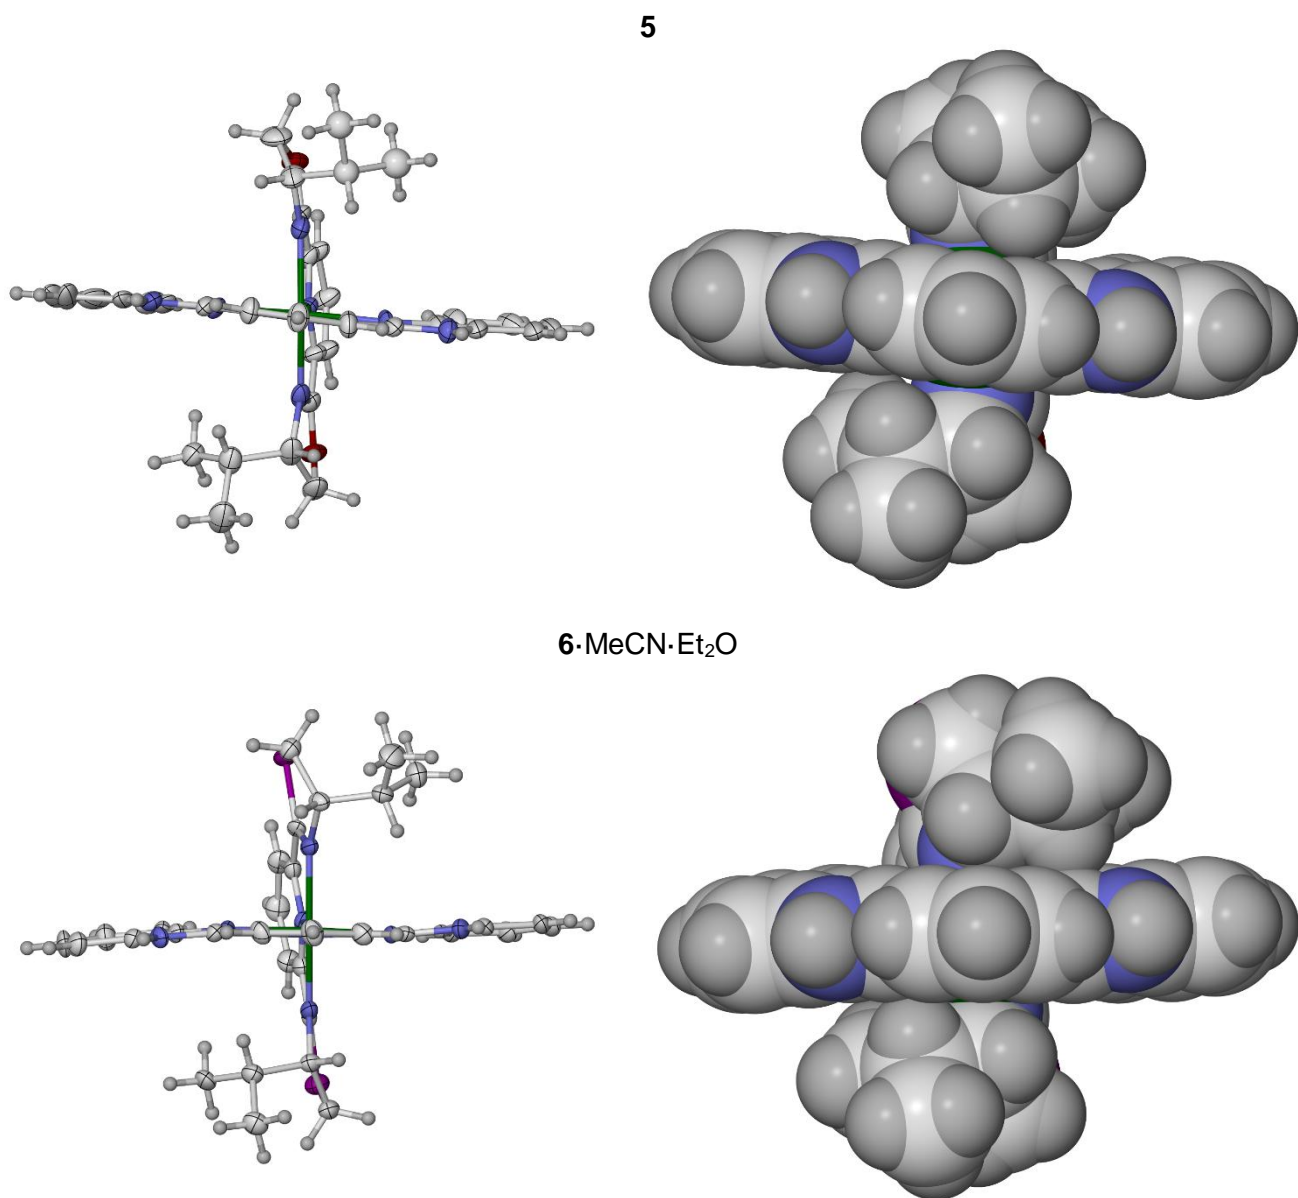

**Figure S12** continued.

The S-shaped bipy conformation in **4** is explained by the steric influence of a short inter-molecular C–H···H–C contact to a benzimidazolyl group in that crystal (Figure S13). This conformational distortion has no obvious effect on the inner coordination sphere of the complex (Table S3), or on its low-spin properties.

The only complex whose structure may be influenced by intramolecular steric interactions is **5**, whose *isopropyl* substituents are oriented to induce the observed canting of the bipy ligand. This feature is reproduced in the DFT calculations of this molecule (Figure S36), and may contribute to stabilising the high-spin state of that complex.

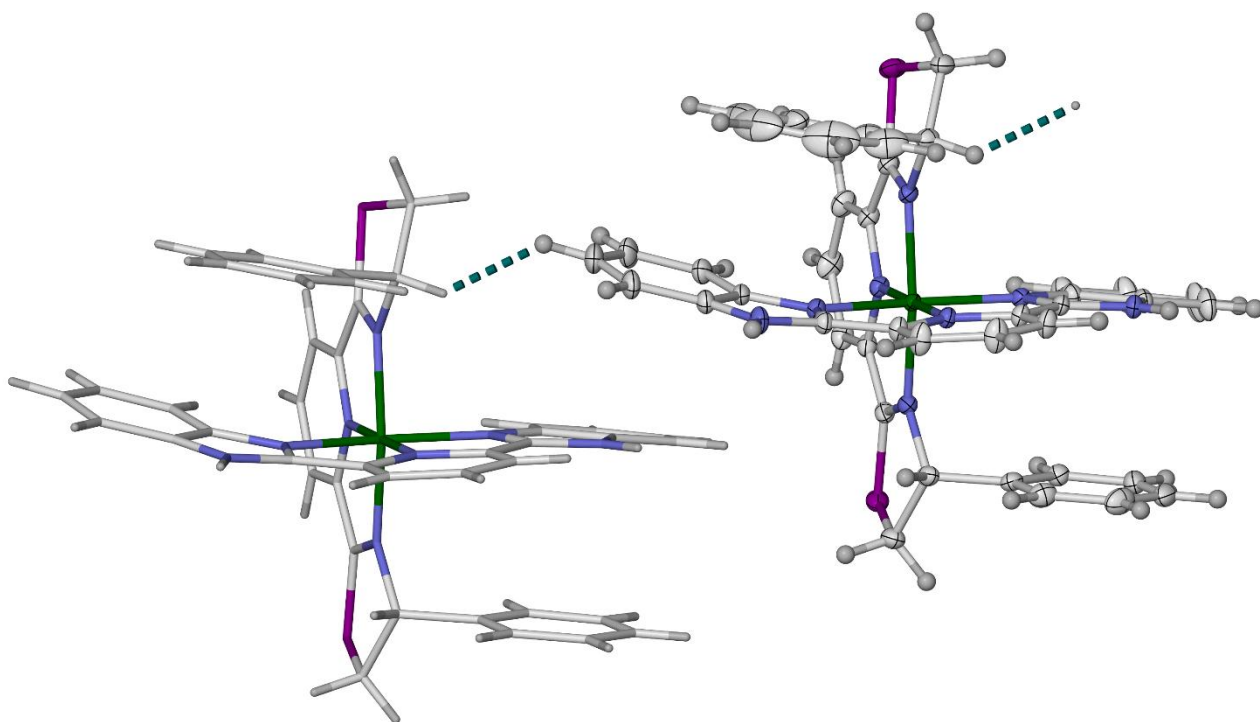

**Figure S13** The intermolecular steric clash responsible for the S-shaped conformation of the bimpy ligand in crystals of **4**.

The H $\cdots$ H contact highlighted on the Figure, H(21) $\cdots$ H(50<sup>iii</sup>), is 2.09 Å [symmetry code: (iii)  $-1+x, y, z$ ]. While this is *ca* 0.3 Å shorter than the sum of the van der Waals radii of two H atoms,<sup>22</sup> the distance should be interpreted with care since the H atoms in the structure were not refined positionally.

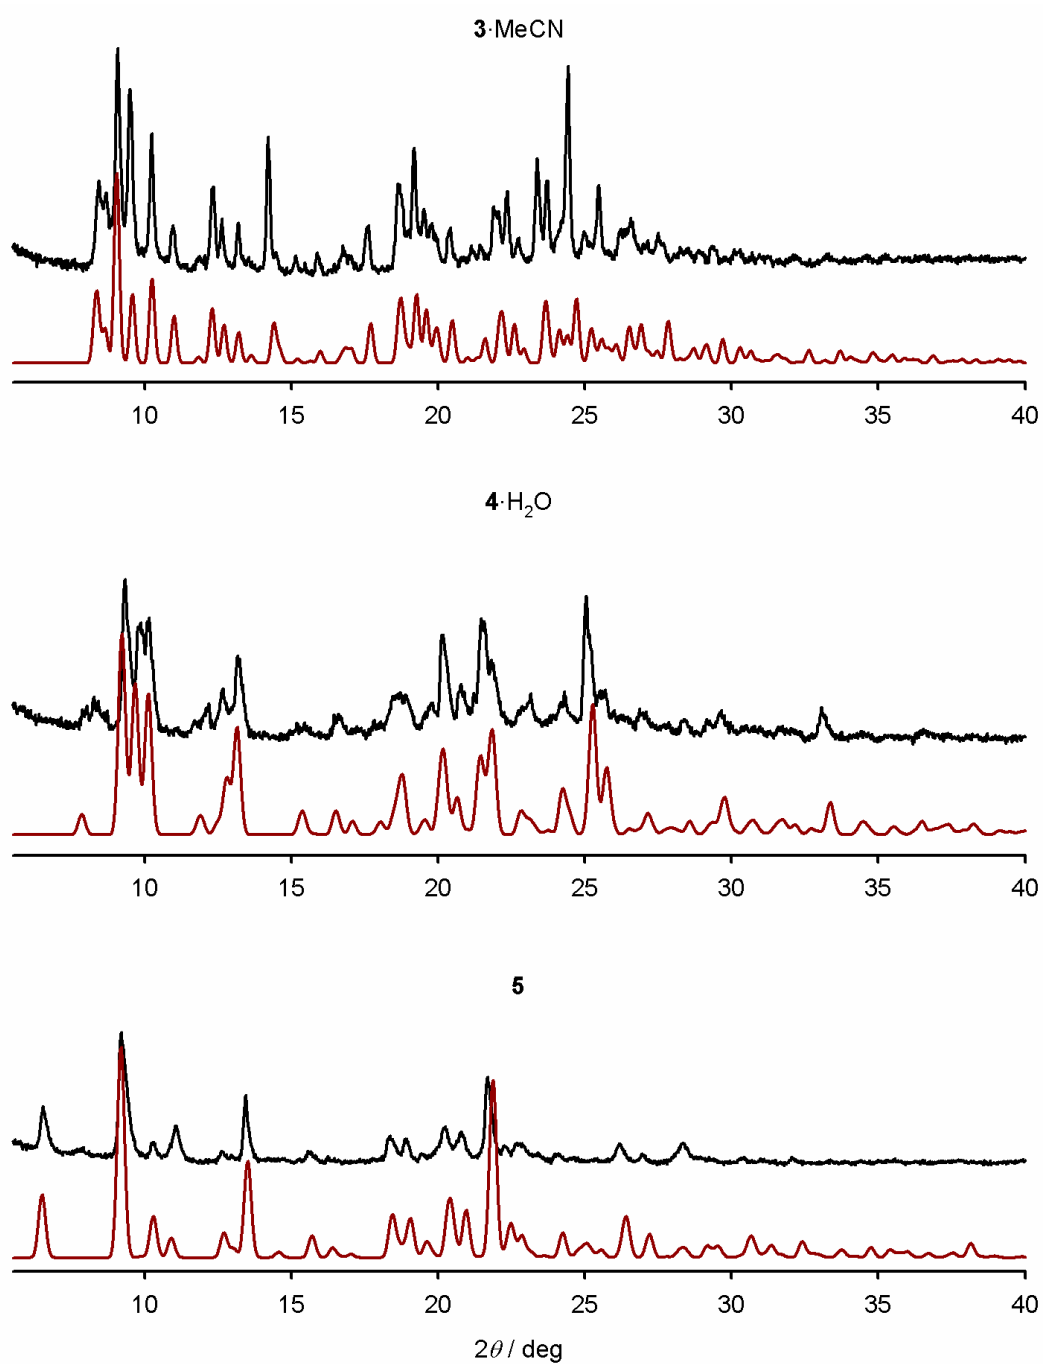

**Figure S14** Room temperature X-ray powder diffraction data for  $3 \cdot \text{MeCN-6}$ . The measured powder patterns are shown in black, and crystallographic simulations are shown in red.

These data are discussed on the following page.

6

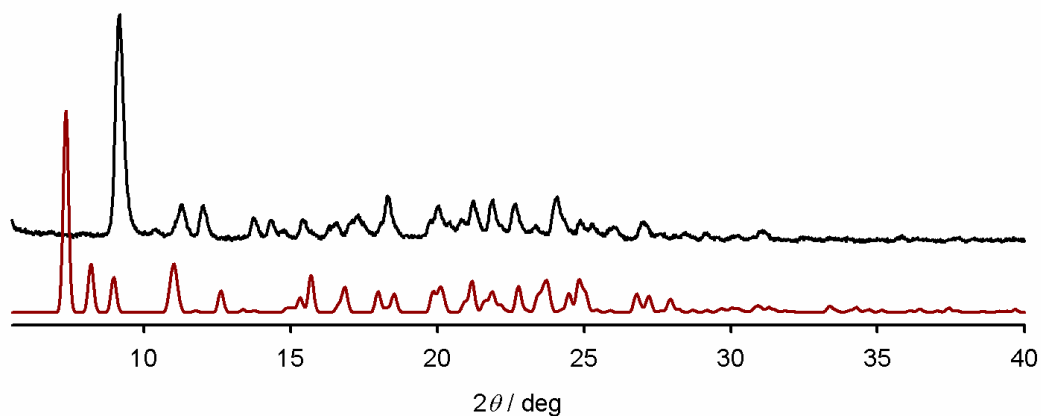

**Figure S14** continued.

The powder patterns of **3**·MeCN-**5** on the previous page agree well with their crystallographic simulations. This includes **4**, whose fresh crystals are solvent-free but absorb atmospheric moisture on exposure to air by microanalysis. However, crystals of **6**·MeCN·Et<sub>2</sub>O evidently transform to a new phase during solvent loss upon exposure to air.

Magnetic data for these solid materials are shown in Figure 4 of the main article.

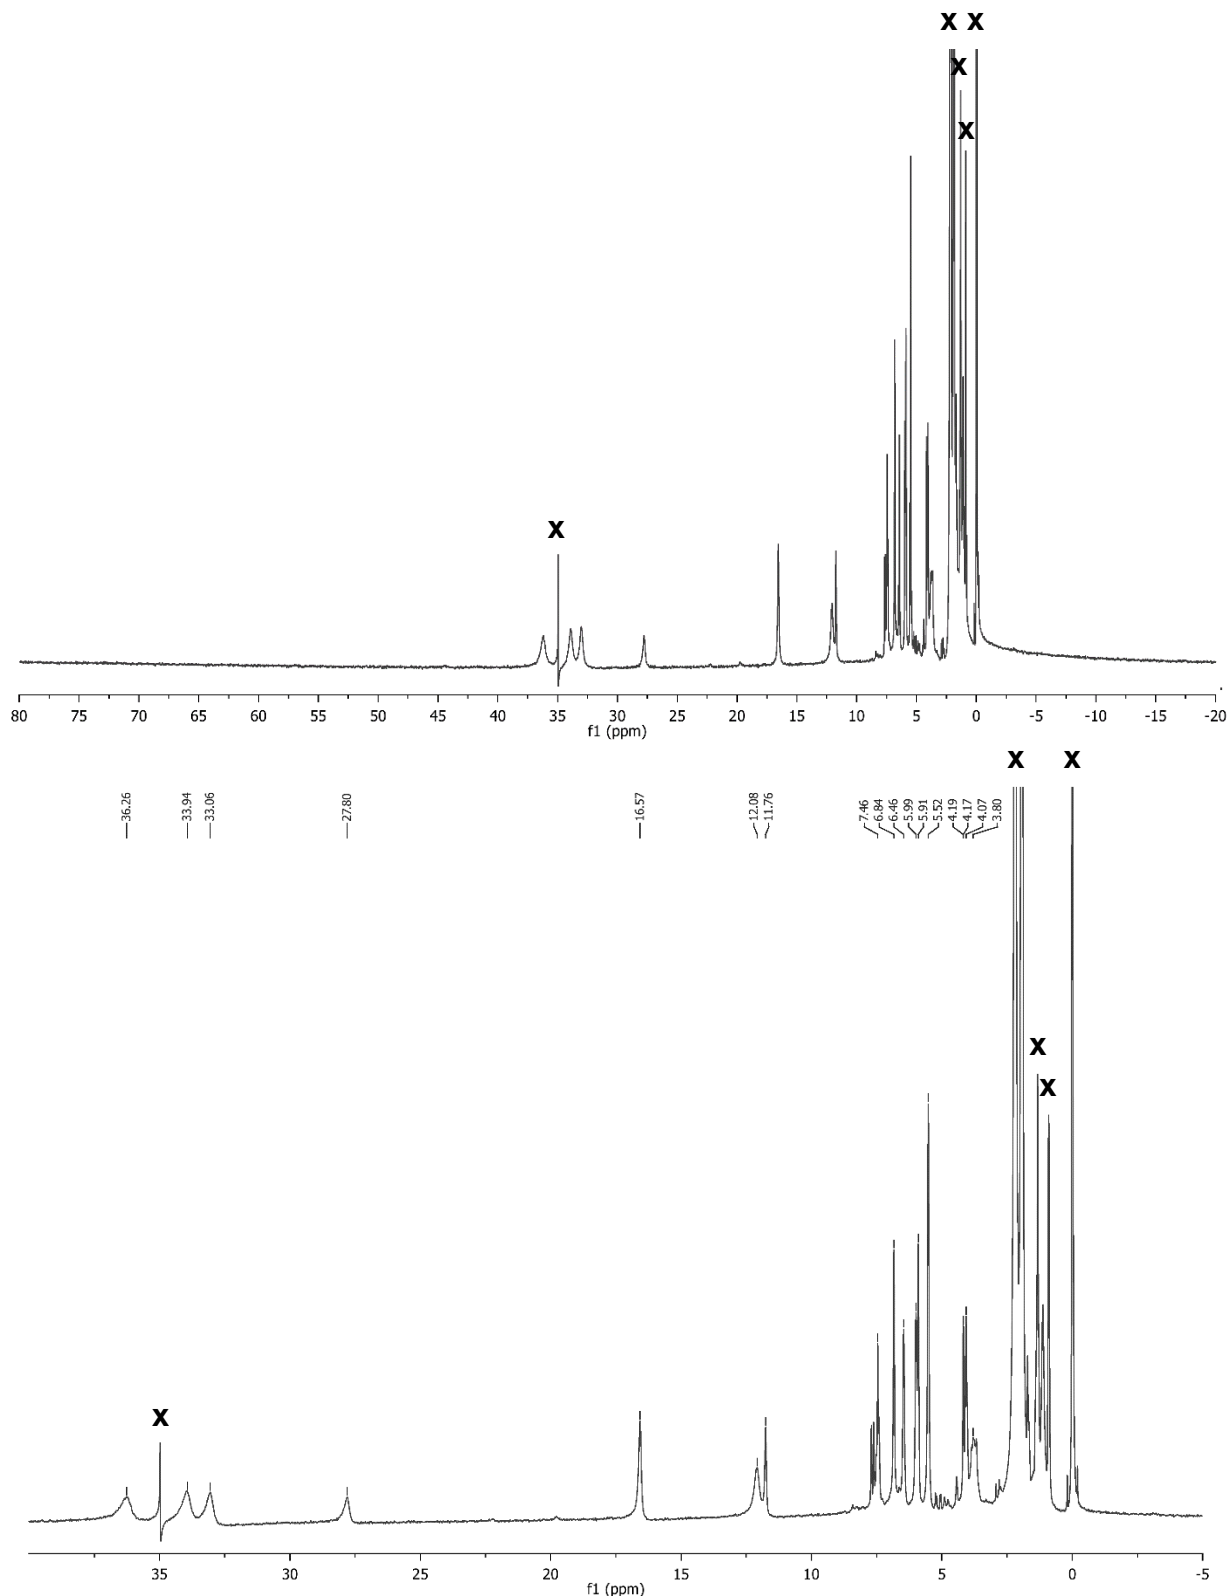

**Figure S15** <sup>1</sup>H NMR spectrum of **3** (CD<sub>3</sub>CN). Top: full paramagnetic range. Bottom: expansion of the main peaks assigned to the heteroleptic complex **3**. The feature at 35 ppm is a spectrometer artefact, and the peaks at 0.9 and 1.3 ppm are impurities in the NMR solvent (present in Figures S15-S17, S25, S26, S30 and S31).

A molecule of **3** has 32 protons in 15 unique environments. All these peaks are resolved in the spectrum, and there are no significant iron-containing impurities in the solution.

The moderate contact shifts in the spectrum are consistent with magnetic measurements, which show the solution has a mixed high:low-spin population at 298 K ( $\chi_{MT} = 1.8 \text{ cm}^3 \text{ mol}^{-1} \text{ K}$ ; (Figure 5, main article).

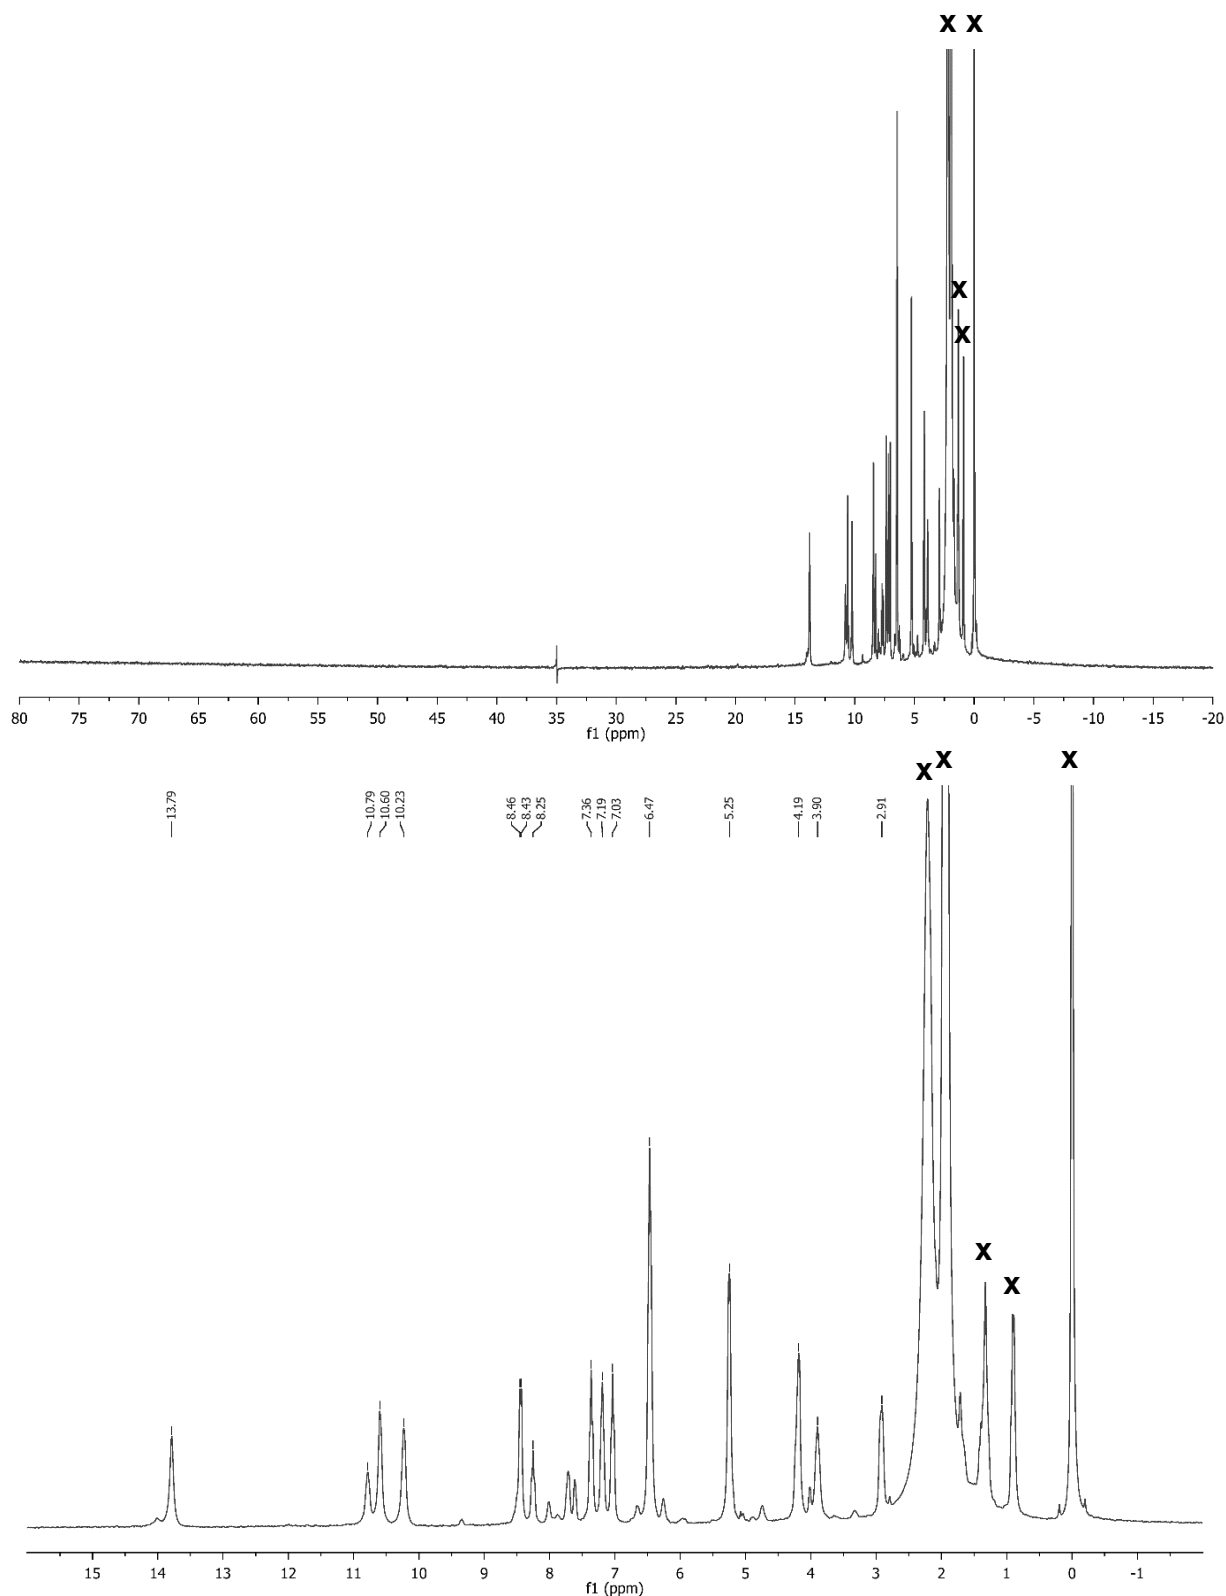

**Figure S16**  $^1\text{H}$  NMR spectrum of **4** ( $\text{CD}_3\text{CN}$ ). Top: full paramagnetic range. Bottom: expansion of the main peaks assigned to the heteroleptic complex **4**. The feature at 35 ppm is a spectrometer artefact, and the peaks at 0.9 and 1.3 ppm are impurities in the NMR solvent (present in Figures S15-S17, S25, S26, S30 and S31).

A molecule of **4** has 32 protons in 15 unique environments. All these peaks are resolved in the spectrum, and there are no significant iron-containing impurities in the solution.

The small contact shifts in the spectrum support the magnetic measurements, which imply the complex has a small but non-zero paramagnetism at room temperature ( $\chi_{\text{M}}T = 0.2 \text{ cm}^3 \text{ mol}^{-1} \text{ K}$ ; (Figure 5, main article).

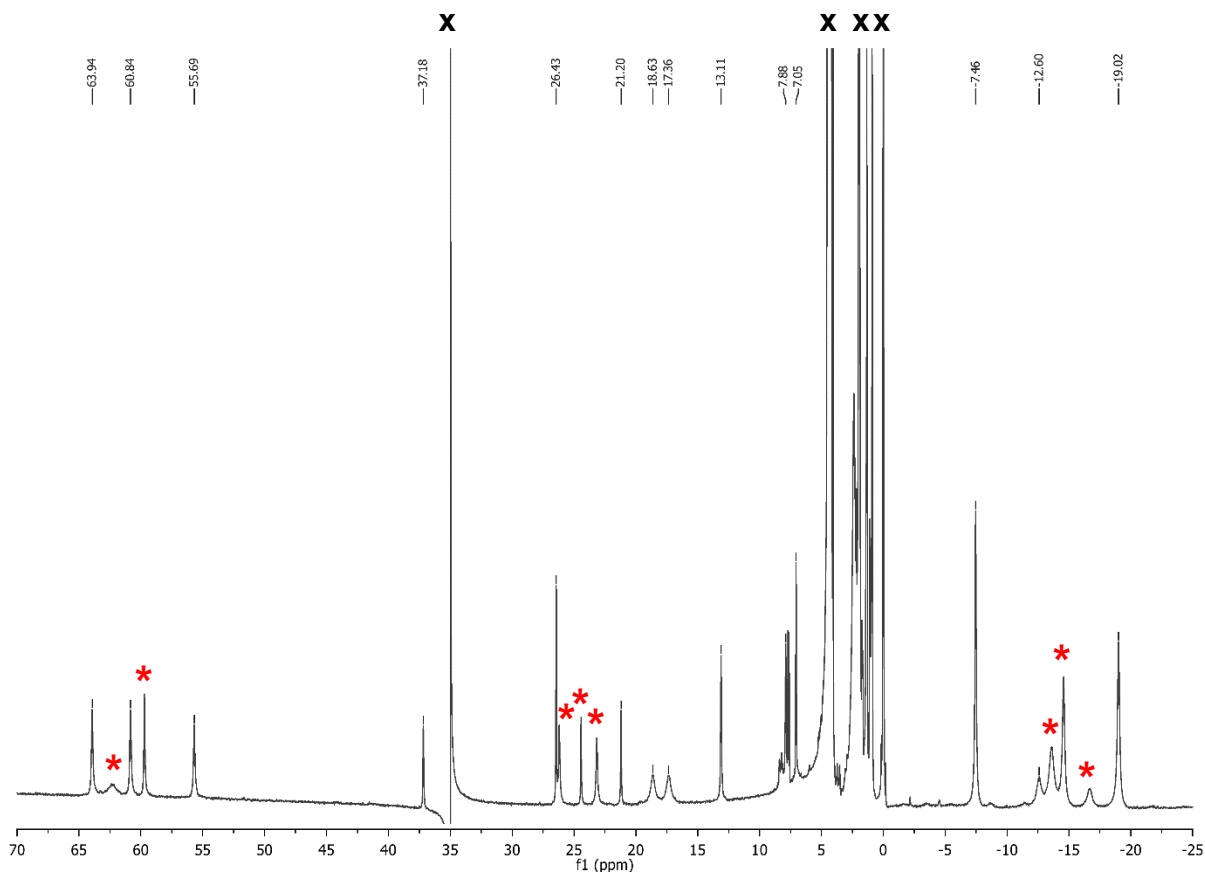

**Figure S17**  $^1\text{H}$  NMR spectrum of **5** ( $\text{CD}_3\text{CN}$ ). The feature at 35 ppm is a spectrometer artefact (present in Figures S15-S17, S25, S26, S30 and S31).

A molecule of **5** has 36 protons in 15 unique environments, including diastereotopic *isopropyl* methyl substituents. Only 14 of these environments are clear in the spectrum; we tentatively suggest the peak from the NH protons may not be present.

The starred peaks are from  $[\text{Fe}((S)\text{-}L^1i\text{Pr})_2]^{2+}$ ,<sup>4</sup> in a ratio of *ca* 0.25:1 compared to the main species. There is no  $[\text{Fe}(\text{bimpy})_2]^{2+}$  in the solution,<sup>23</sup> but extra peaks in the aromatic part of the diamagnetic region may correspond to uncoordinated bimpy.

The large contact shifts in the spectrum are consistent with magnetic measurements in this solvent, which show the complex (and the main impurity  $[\text{Fe}((R)\text{-}L^1i\text{Pr})_2]^{2+}$ ) are both high-spin at room temperature (Figure 5, main article).

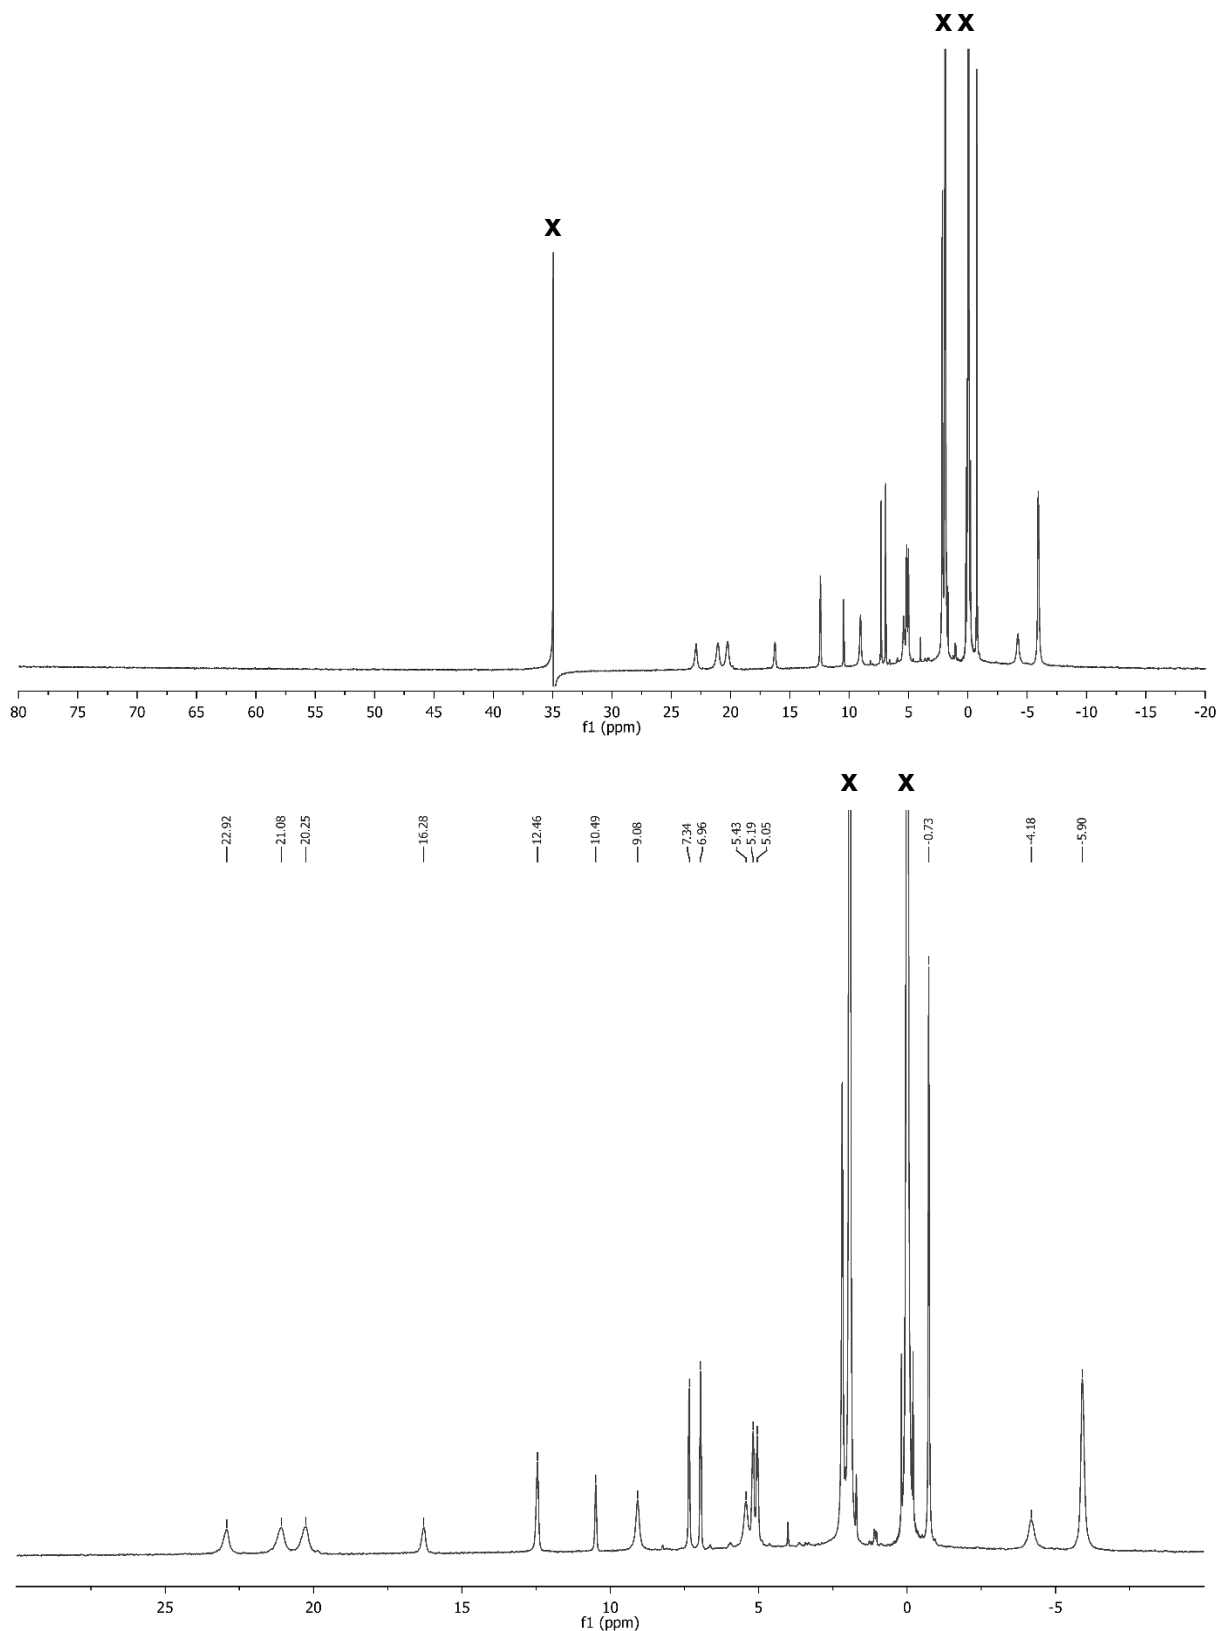

**Figure S18**  $^1\text{H}$  NMR spectrum of **6** ( $\text{CD}_3\text{CN}$ ). Top: full paramagnetic range. Bottom: expansion of the main peaks assigned to the heteroleptic complex **6**. The feature at 35 ppm is a spectrometer artefact.

A molecule of **6** has 36 protons in 15 unique environments, including diastereotopic *isopropyl* methyl substituents. All these peaks are resolved in the spectrum, and there are no impurities visible in the solution.

The small contact shifts in the spectrum are consistent with its magnetic measurements, which show only a small paramagnetism of  $\chi_{\text{M}}T = 1.0 \text{ cm}^3 \text{ mol}^{-1} \text{ K}$  at room temperature (Figure 5, main article).



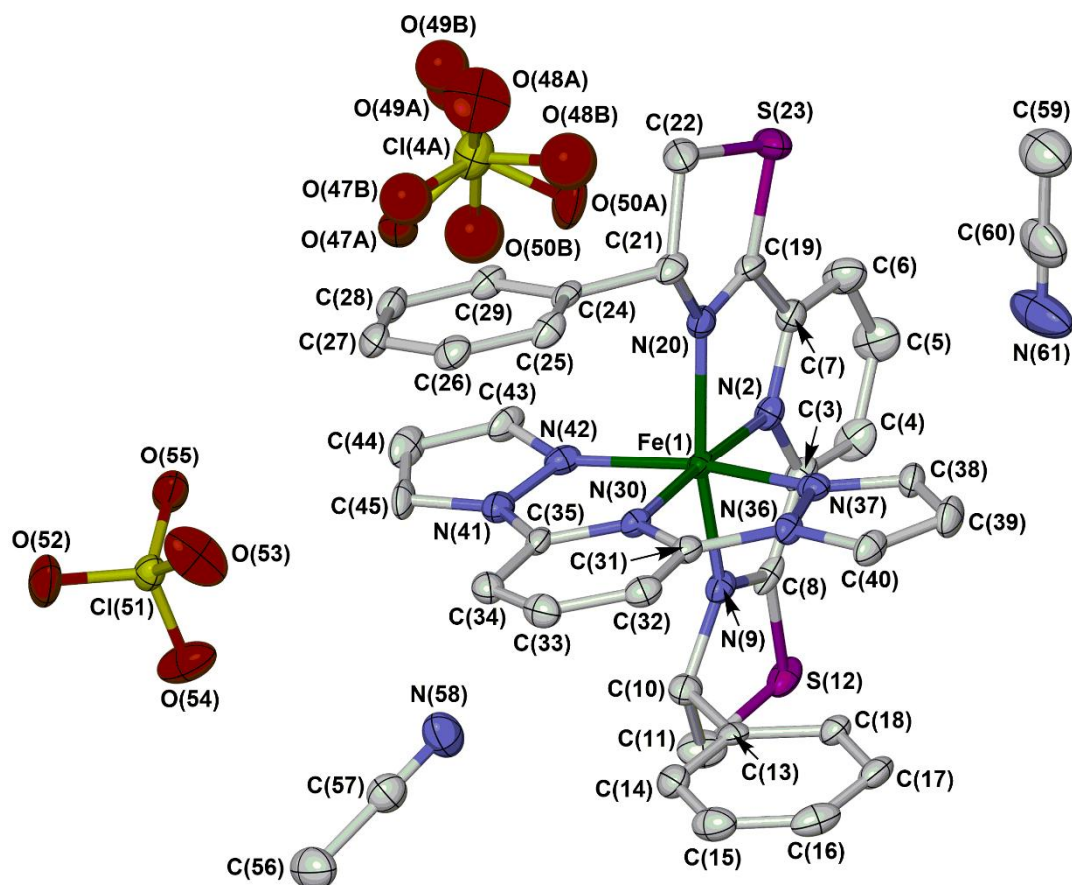

**Figure S19** The asymmetric unit of **8**·2MeCN. Details as for Figure S1. Colour code: C, white; Cl, yellow; Fe, green; N, blue; O, red; S, purple.

Partial atom Cl(4B) is obscured behind Cl(4A).

**Table S6** Selected bond lengths, angles and other structural parameters ( $\text{\AA}$ ,  $^\circ$ ,  $\text{\AA}^3$ ) for homochiral  $[\text{Fe}((R)\text{-}L^2\text{Ph})(\text{bpp})][\text{ClO}_4]_2 \cdot 2\text{MeCN}$  (**8**·2MeCN). See Figure S19 for the atom numbering scheme, while definitions of  $V_{\text{Oh}}$ ,  $\Sigma$ ,  $\Theta$ ,  $\varphi$  and  $\theta$  are given on page S9.

|                  |            |                   |            |
|------------------|------------|-------------------|------------|
| Fe(1)–N(2)       | 1.879(4)   | Fe(1)–N(30)       | 1.906(4)   |
| Fe(1)–N(9)       | 1.978(4)   | Fe(1)–N(37)       | 1.954(4)   |
| Fe(1)–N(20)      | 1.992(4)   | Fe(1)–N(42)       | 1.961(4)   |
| N(2)–Fe(1)–N(9)  | 80.40(17)  | N(9)–Fe(1)–N(42)  | 89.62(16)  |
| N(2)–Fe(1)–N(20) | 79.76(17)  | N(20)–Fe(1)–N(30) | 102.54(17) |
| N(2)–Fe(1)–N(30) | 176.77(17) | N(20)–Fe(1)–N(37) | 90.14(16)  |
| N(2)–Fe(1)–N(37) | 97.99(17)  | N(20)–Fe(1)–N(42) | 92.99(16)  |
| N(2)–Fe(1)–N(42) | 102.29(17) | N(30)–Fe(1)–N(37) | 79.81(16)  |
| N(9)–Fe(1)–N(20) | 160.10(17) | N(30)–Fe(1)–N(42) | 79.94(17)  |
| N(9)–Fe(1)–N(30) | 97.34(17)  | N(37)–Fe(1)–N(42) | 159.72(17) |
| N(9)–Fe(1)–N(37) | 94.22(15)  |                   |            |
| $V_{\text{Oh}}$  | 9.492(12)  | $\varphi$         | 176.77(17) |
| $\Sigma$         | 88.0(6)    | $\theta$          | 85.97(7)   |
| $\Theta$         | 287        |                   |            |

**Table S7** Intramolecular  $\pi \dots \pi$  interaction parameters for **8**·2MeCN (Å, °). See Figure S19 for the atom numbering scheme. The  $L^2Ph$  phenyl groups overlie the C–N bonds linking the pyridyl and pyrazolyl rings of the bpp ligand.

|                                                   | Dihedral angle | Interplanar distance <sup>a</sup> | Horizontal offset <sup>b</sup> |
|---------------------------------------------------|----------------|-----------------------------------|--------------------------------|
| [C(13)–C(18)] $\dots$ [N(30)–C(40)]               | 6.0(2)         | 3.285(13)                         | 0.67                           |
| [C(24)–C(29)] $\dots$ [ N(30)–C(35), N(41)–C(45)] | 7.6(2)         | 3.240(13)                         | 0.40                           |

<sup>a</sup>This is the average distance between each atom in the interacting phenyl ring, and the least squares plane of the stacked pyridylpyrazolyl group. <sup>b</sup>This is calculated from the centroids of the two interacting residues.

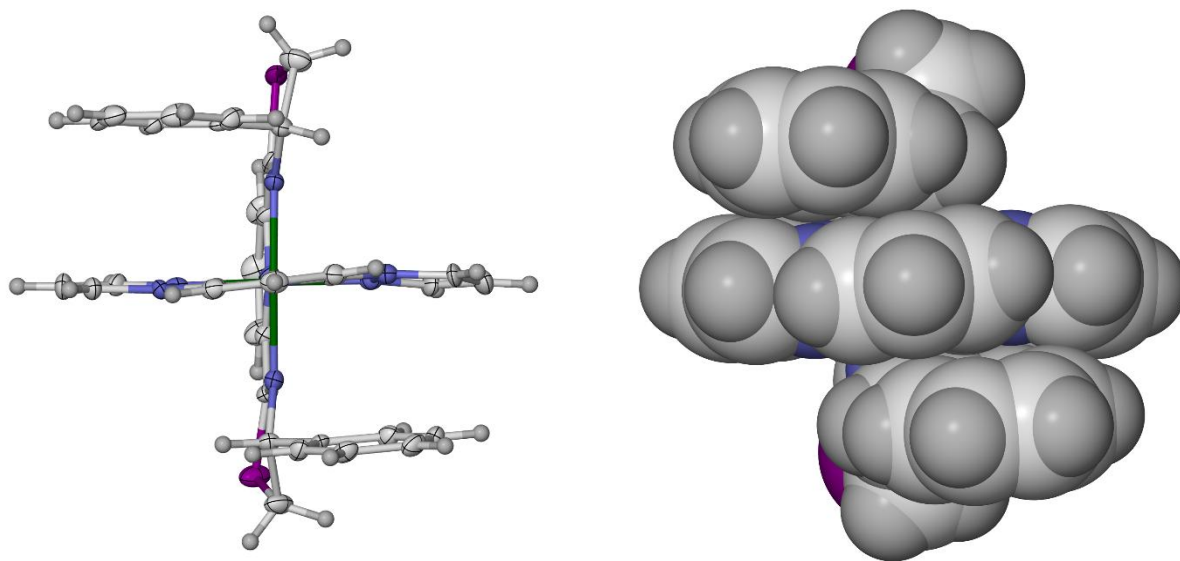

**Figure S20** Displacement ellipsoid plot (left) and space-filling view (right) of the  $[Fe(L^2Ph)(bpp)]^{2+}$  complex cation in the crystal of **8**·2MeCN. The view is down the Fe–N{pyridyl} bond to the bpp ligand, which highlights the bpp ligand conformation and its interactions with the  $L^2Ph$  phenyl groups.

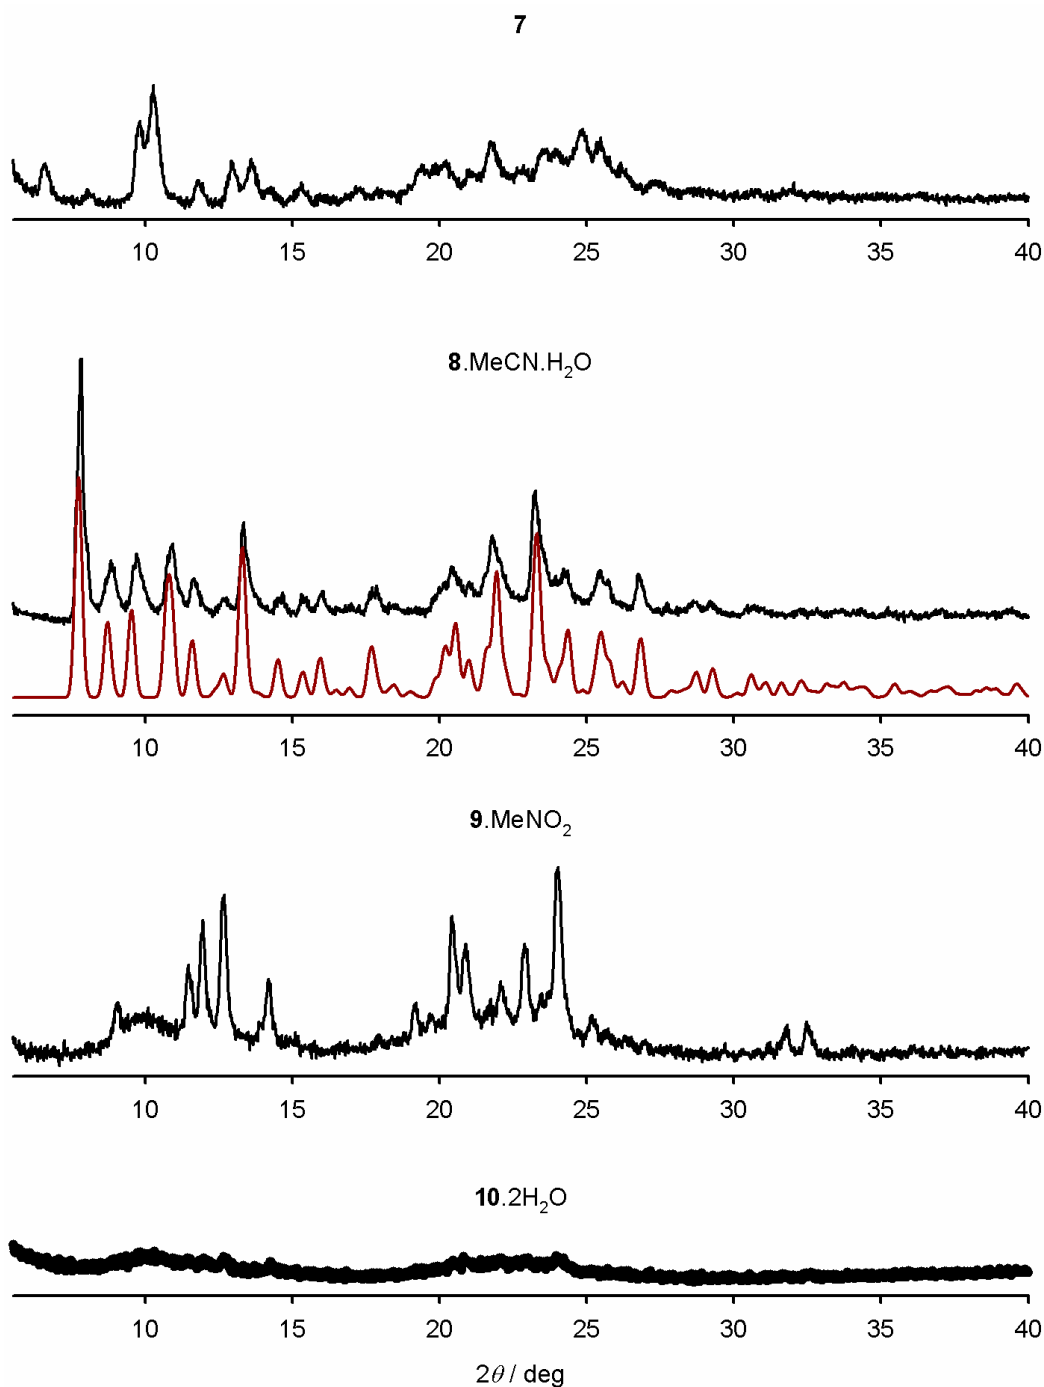

**Figure S21** Room temperature X-ray powder diffraction data for **7-10**·2H<sub>2</sub>O. The measured powder patterns are shown in black, and the crystallographic simulation of **8**·2MeCN is shown in red.

Although the peaks are broadened, the powder pattern of **8**·MeCN·H<sub>2</sub>O is a good match for its crystallographic simulation. The peak broadening may be a consequence of partial replacement of the lattice solvent upon exposure to air.

The samples of **7** and **9**·MeNO<sub>2</sub> are mixtures of weakly crystalline and amorphous material, while the powder pattern of **10**·2H<sub>2</sub>O is almost featureless. No crystal structures are available of these complexes for comparison with these data.

The freshly prepared materials are clearly contaminated by yellow crystals of [Fe(bpp)<sub>2</sub>][ClO<sub>4</sub>]<sub>2</sub>, which was removed manually before analysis. There is no evidence for the presence of this phase in these samples.

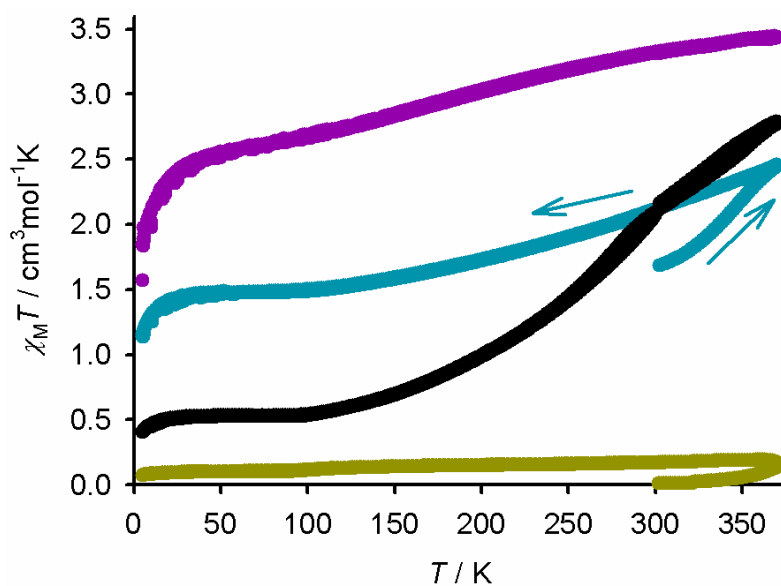

**Figure S22** Solid state magnetic data for **7** (black), **8**·MeCN·H<sub>2</sub>O (yellow), **9**·MeNO<sub>2</sub> (purple) and **10**·2H<sub>2</sub>O (cyan), on a 300→370→5→300 K temperature cycle at a scan rate 5 K min<sup>-1</sup>.

The low-spin nature of **8**·MeCN·H<sub>2</sub>O is consistent with the crystal structure of the freshly prepared material, **8**·2MeCN. No crystallographic data are available for the other compounds in the graph, but the gradual and incomplete nature of their SCO is consistent with their poorly crystalline or (for **10**·2H<sub>2</sub>O) amorphous nature (Figure S21).

The irreversibility in the data for **8**·MeCN·H<sub>2</sub>O and **10**·2H<sub>2</sub>O above 300 K implies the samples lost lattice solvent on heating inside the magnetometer, which affected their spin-state behaviour.<sup>21</sup>

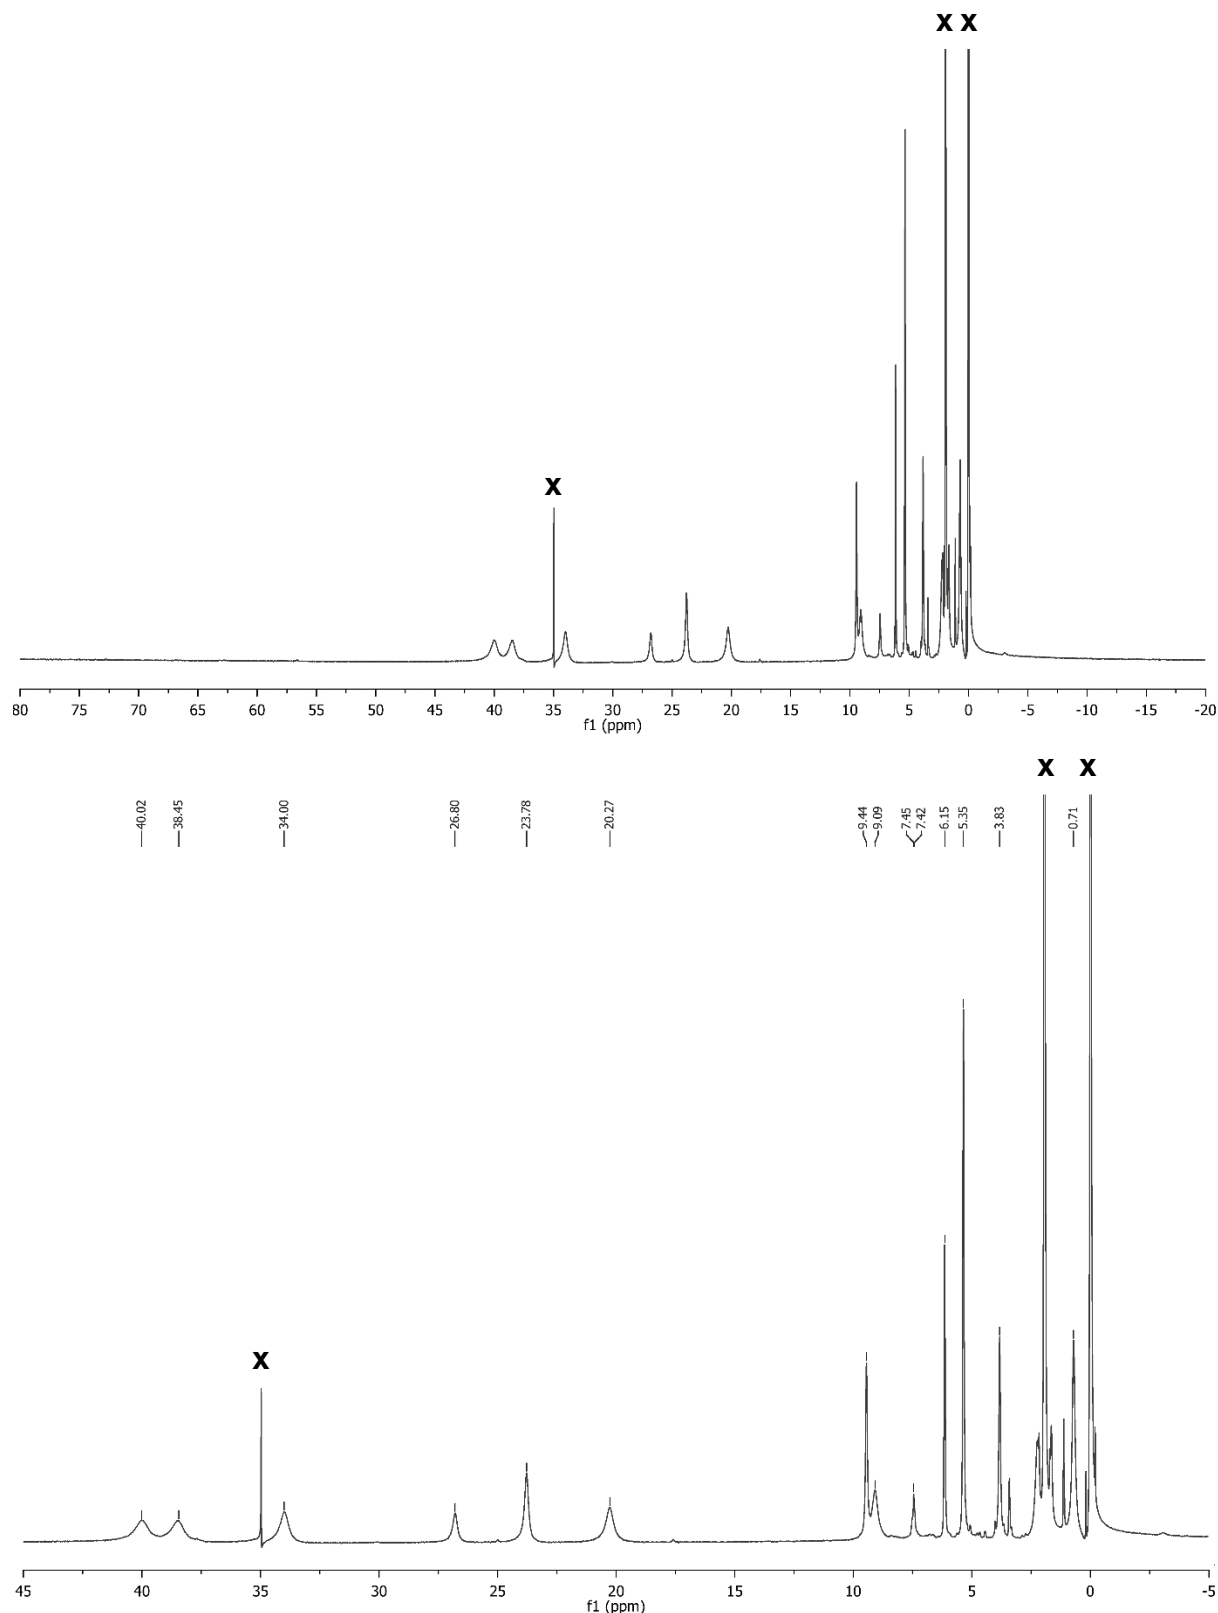

**Figure S23**  $^1\text{H}$  NMR spectrum of **7** ( $\text{CD}_3\text{CN}$ ). Top: full paramagnetic range. Bottom: expansion of the main peaks assigned to the heteroleptic complex **7**. The feature at 35 ppm is a spectrometer artefact.

A molecule of **7** has 32 protons in 13 unique environments, which are all resolved in the spectrum. There are no significant impurity peaks in the spectrum.

The significant contact shifts in the spectrum are consistent with magnetic measurements, which show the complex adopts a mixed high:low-spin population at room temperature in this solvent ( $\chi_{\text{M}}T = 2.0 \text{ cm}^3 \text{ mol}^{-1} \text{ K}$ ; Figure 6, main article).

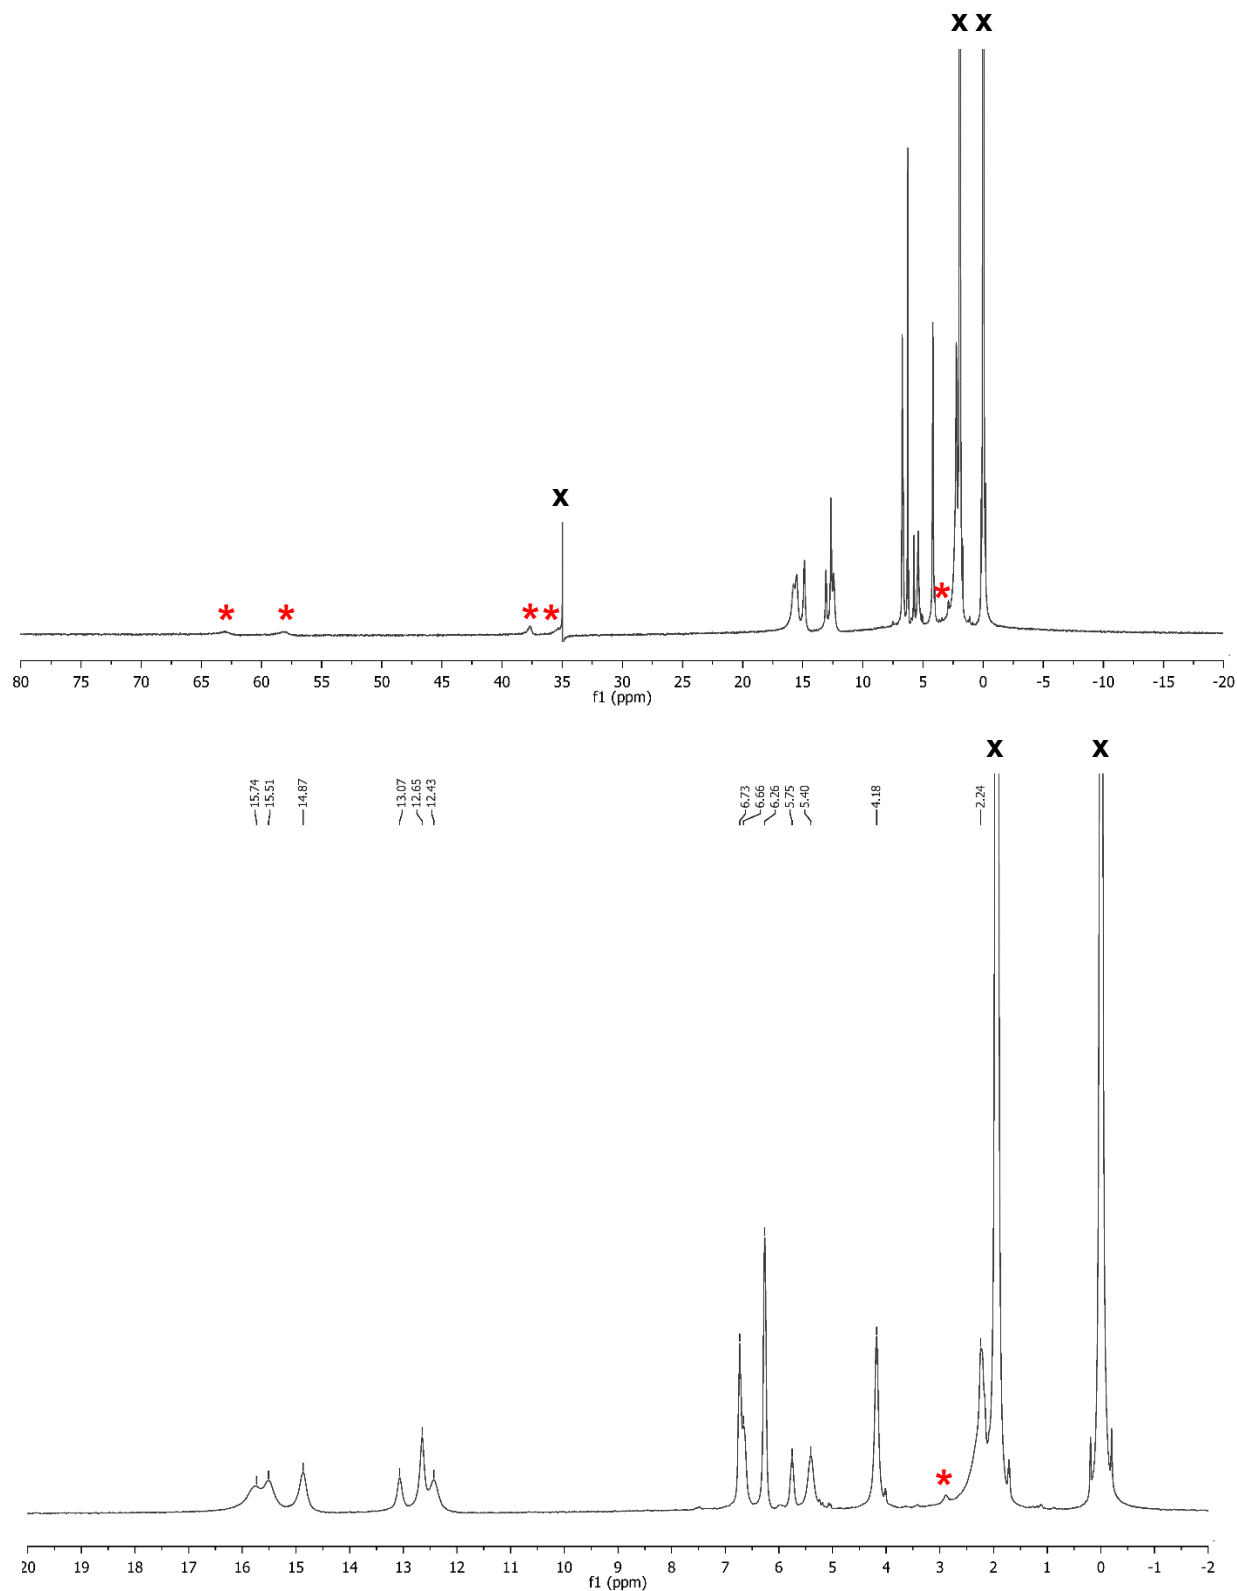

**Figure S24** <sup>1</sup>H NMR spectrum of **8** (CD<sub>3</sub>CN). Top: full paramagnetic range. Bottom: expansion of the main peaks assigned to the heteroleptic complex **8**. The feature at 35 ppm is a spectrometer artefact.

A molecule of **8** has 28 protons in 13 unique environments, which are all resolved in the spectrum. The starred peaks are from [Fe(bpp)<sub>2</sub>]<sup>2+</sup>,<sup>6</sup> which comprises *ca* 10 % of the sample; there are no peaks attributable to [Fe(*R*)-*L*<sup>2</sup>Ph)<sub>2</sub>]<sup>2+</sup>.<sup>2</sup>

The small contact shifts in the spectrum are consistent with its solution magnetic measurements, which show only a small paramagnetism of  $\chi_M T = 0.8 \text{ cm}^3 \text{ mol}^{-1} \text{ K}$  at room temperature (Figure 6, main article).

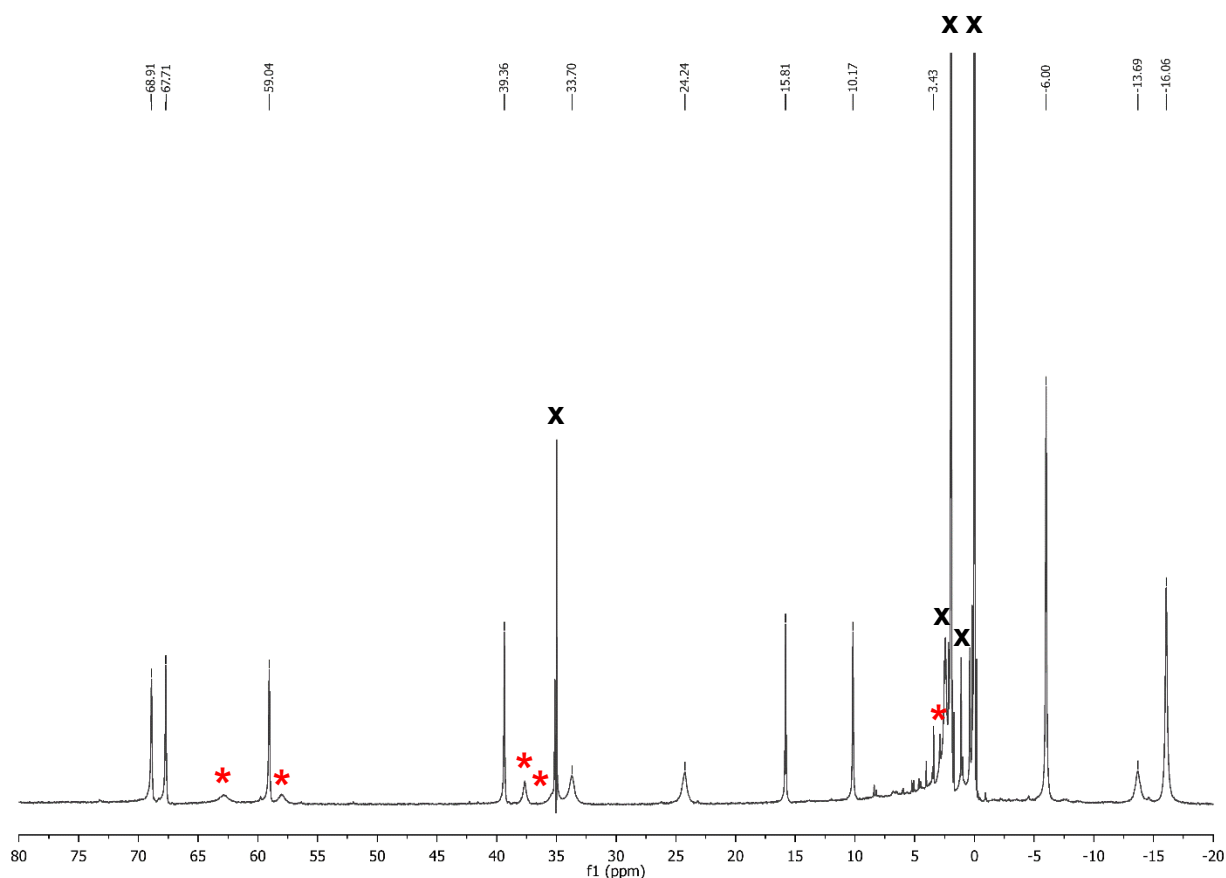

**Figure S25**  $^1\text{H}$  NMR spectrum of **9** ( $\text{CD}_3\text{CN}$ ). The feature at 35 ppm is a spectrometer artefact, and the peaks at 0.9 and 1.3 ppm are impurities in the NMR solvent (present in Figures S15-S17, S25, S26, S30 and S31).

A molecule of **9** has 32 protons in 13 unique environments, including diastereotopic *isopropyl* methyl substituents. Only 12 of these are resolved in the spectrum. Another peak is expected between 20-40 ppm, which may be masked by the 35 ppm spectrometer artefact. The starred peaks are from  $[\text{Fe}(\text{bpp})_2]^{2+}$ ,<sup>6</sup> which comprises *ca* 15 % of the sample; there are no peaks attributable to  $[\text{Fe}((S)\text{-}L^1\text{iPr})_2]^{2+}$ ,<sup>4</sup> but weak resonances in the diamagnetic region might correspond to uncoordinated  $L^1\text{iPr}$  ligand.

The strongly contact-shifted spectrum is consistent with its solution magnetic measurements, which show the complex is high-spin at room temperature (Figure 6, main article).

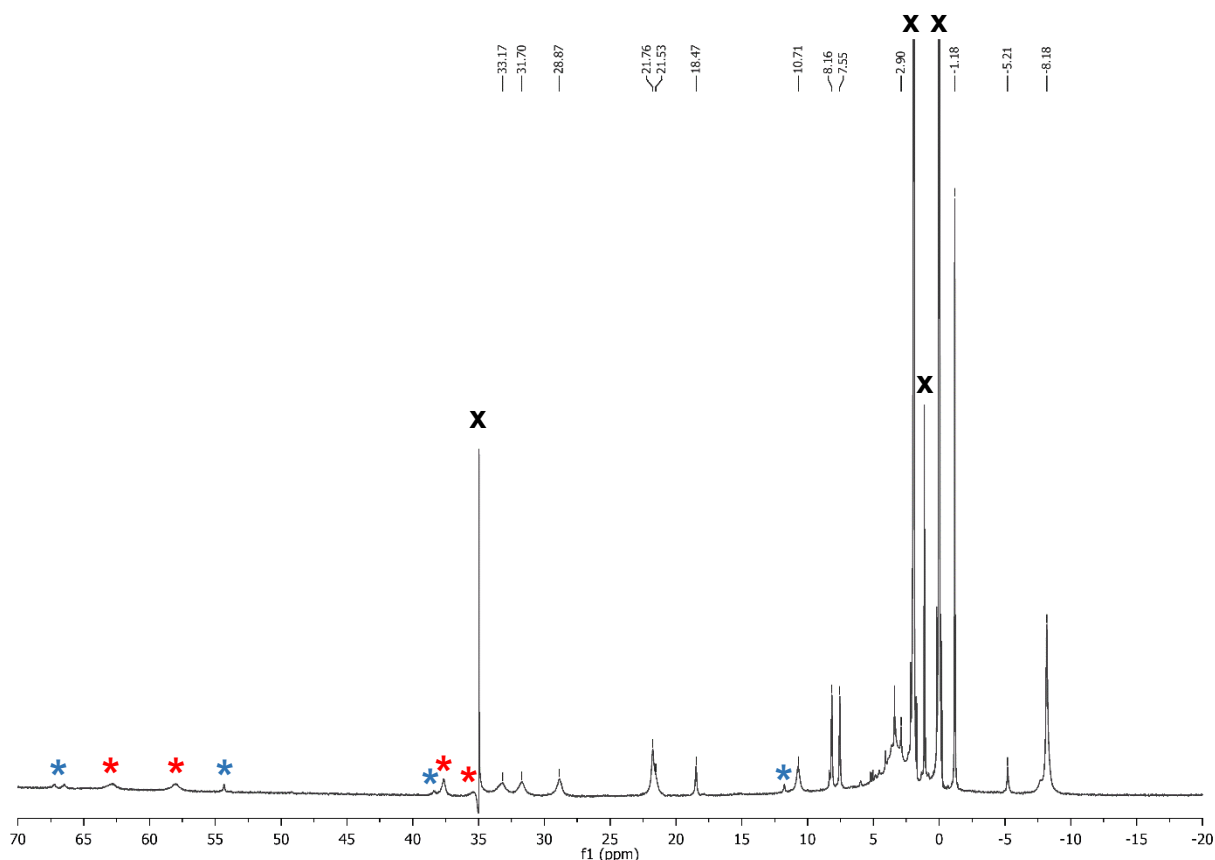

**Figure S26**  $^1\text{H}$  NMR spectrum of **10** ( $\text{CD}_3\text{CN}$ ). The feature at 35 ppm is a spectrometer artefact, and the peaks at 0.9 and 1.3 ppm are impurities in the NMR solvent (present in Figures S15-S17, S25, S26, S30 and S31).

A molecule of **10** has 32 protons in 13 unique environments, including diastereotopic *isopropyl* methyl substituents, which are all resolved in the spectrum. The red starred peaks are from  $[\text{Fe}(\text{bpp})_2]^{2+}$ ,<sup>6</sup> which comprises *ca* 25 % of the sample, while the blue starred peaks are from another paramagnetic species whose identity is unclear. There are no peaks attributable to  $[\text{Fe}((S)\text{-}L^2i\text{Pr})_2]^{2+}$  in the spectrum.<sup>2</sup>

The moderate contact shifts in the spectrum are consistent with its solution magnetic measurements, which show the complex adopts a mixed high:low-spin population at 298 K ( $\chi_{\text{MT}} = 2.6 \text{ cm}^3 \text{ mol}^{-1} \text{ K}$ ; Figure 6, main article).



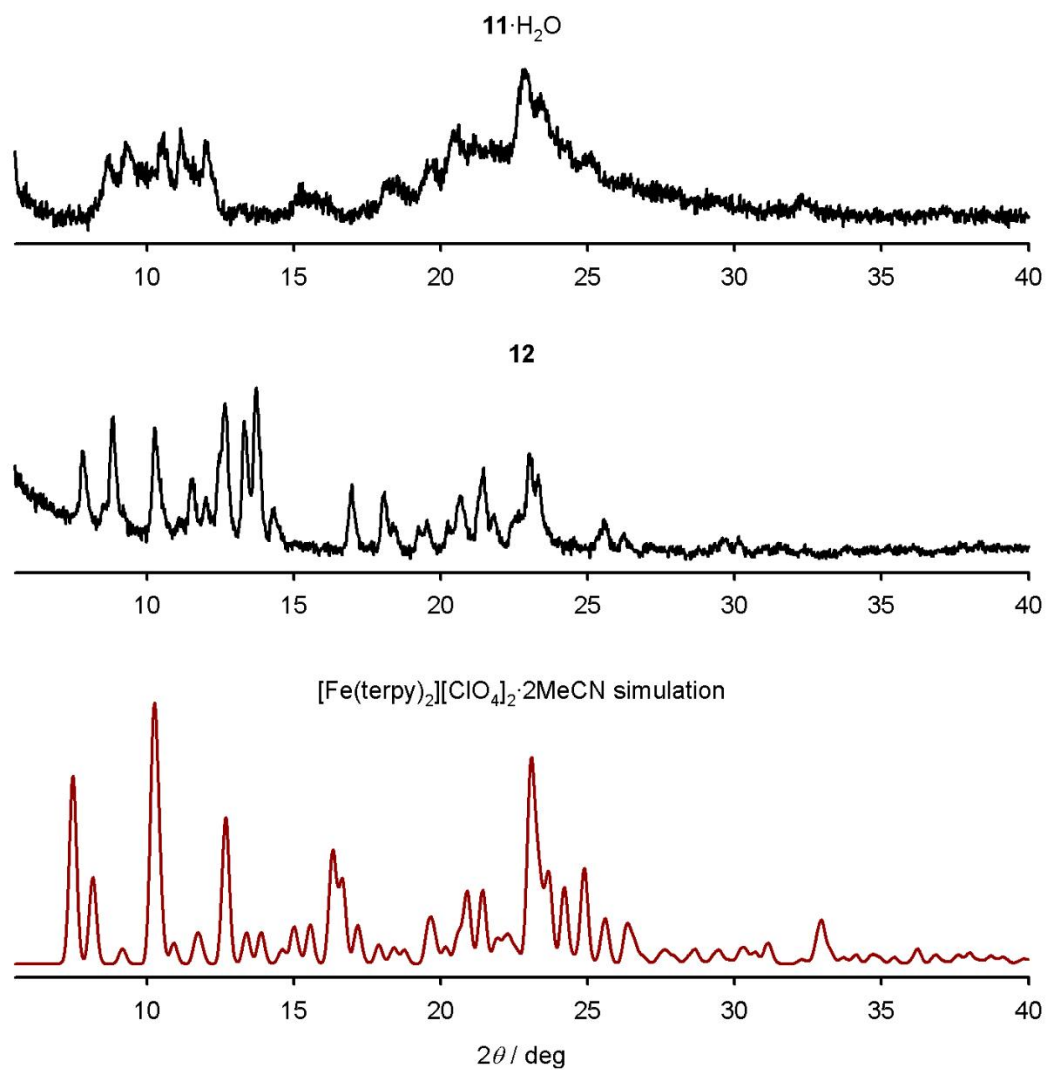

**Figure S27** Room temperature X-ray powder diffraction data for  $11 \cdot \text{H}_2\text{O}$  and **12** (black). A simulation of the solvate of  $[\text{Fe}(\text{terpy})_2][\text{ClO}_4]_2$  isolated from recrystallisations of these compounds is also included (red).

Despite their good microanalyses, these samples contain a mixture of species, which probably includes  $[\text{Fe}(\text{terpy})_2][\text{ClO}_4]_2$  (Figures S30 and S31). Some strong peaks from the simulated powder pattern of  $[\text{Fe}(\text{terpy})_2][\text{ClO}_4]_2 \cdot 2\text{MeCN}$  (Figure S29) have counterparts in the data for  $11 \cdot \text{H}_2\text{O}$  and **12**, which tentatively supports that conclusion.

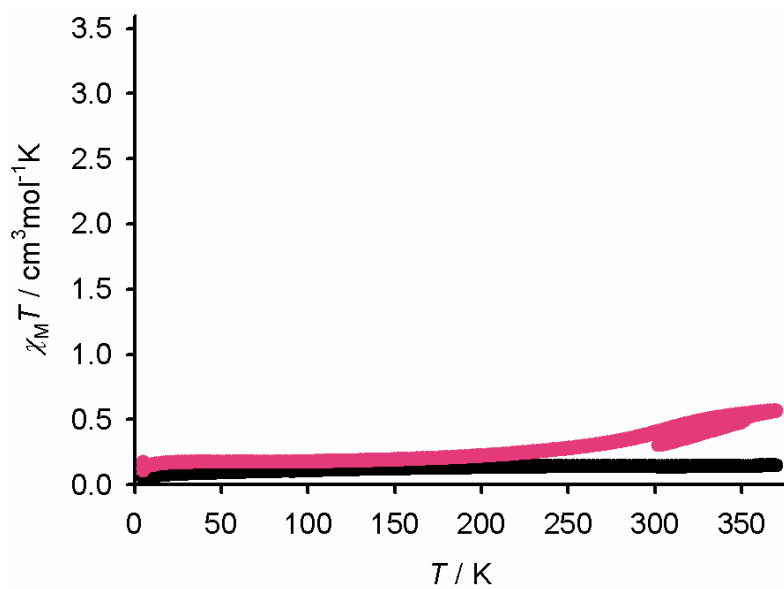

**Figure S28** Solid state magnetic data for **11**·H<sub>2</sub>O (black) and **12** (pink), on a 300→370→5→300 K temperature cycle at a scan rate 5 K min<sup>-1</sup>.

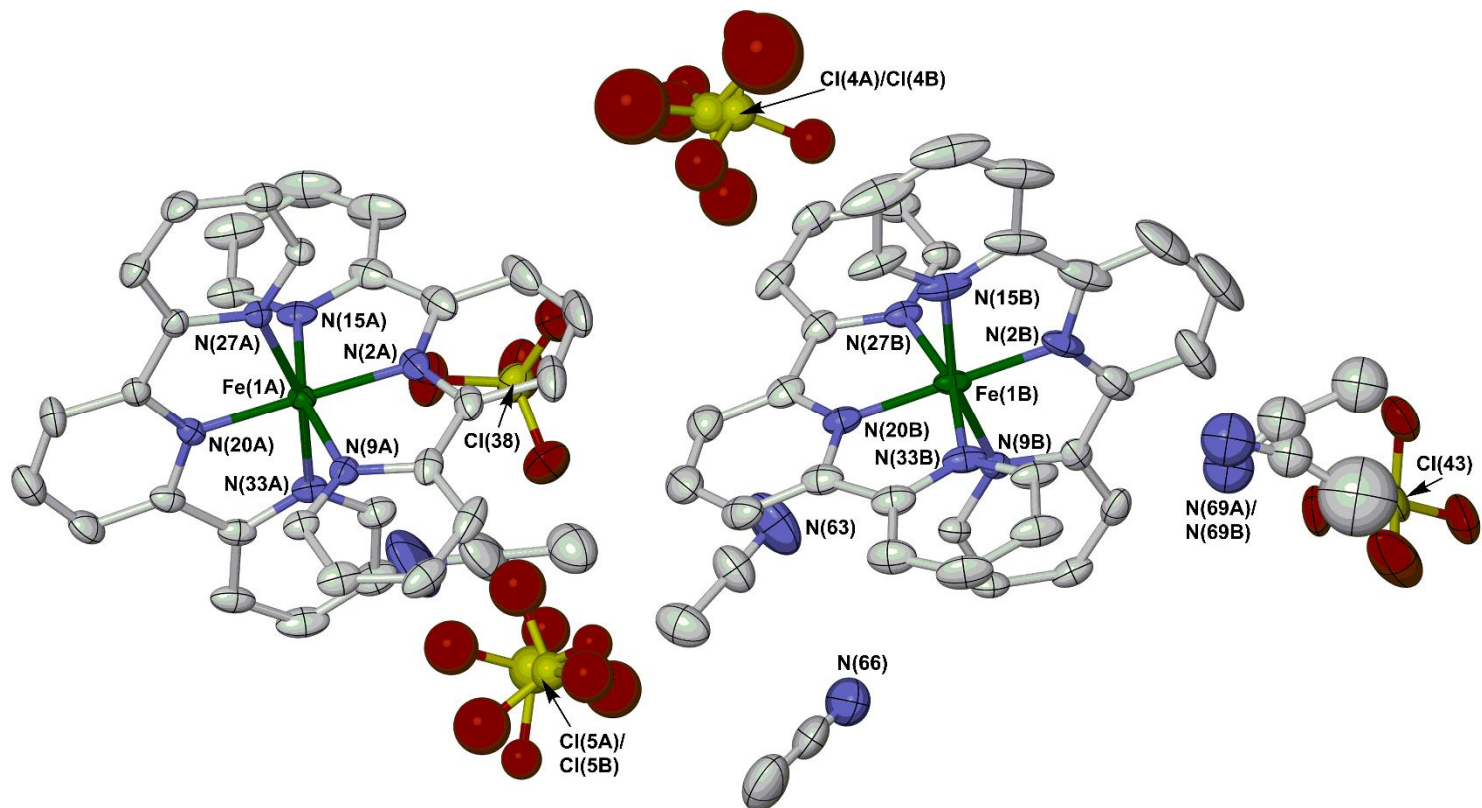

**Figure S29** The asymmetric unit of  $[\text{Fe}(\text{terpy})_2][\text{ClO}_4]_2 \cdot 2\text{MeCN}$ , with selected atom numbering. Other details as for Figure S1.

This crystal was taken from a mixture of crystals and powder, produced by recrystallisation of a material analysing as  $\mathbf{11} \cdot \text{H}_2\text{O}$  from MeCN/Et<sub>2</sub>O. The same crystals also occurred in a recrystallised sample of **12**.

The Fe–N bond lengths and N–Fe–N angles are not tabulated in this ESI, but are typical for low-spin  $[\text{Fe}(\text{terpy})_2]^{2+}$  derivatives without intramolecular steric hindrance.<sup>24</sup> The crystal is isomorphous with previously published  $[\text{Ru}(\text{terpy})_2][\text{PF}_6]_2 \cdot 2\text{MeCN}$ .<sup>25</sup>

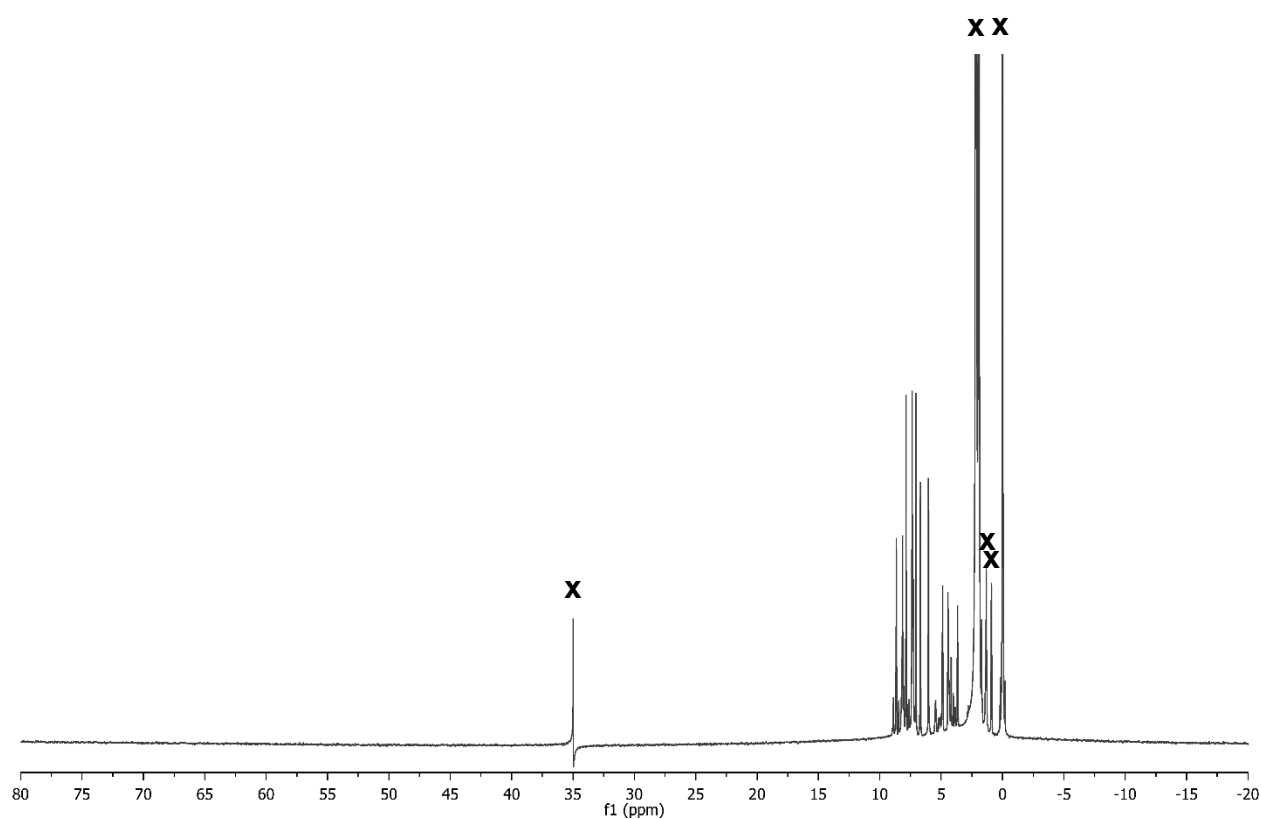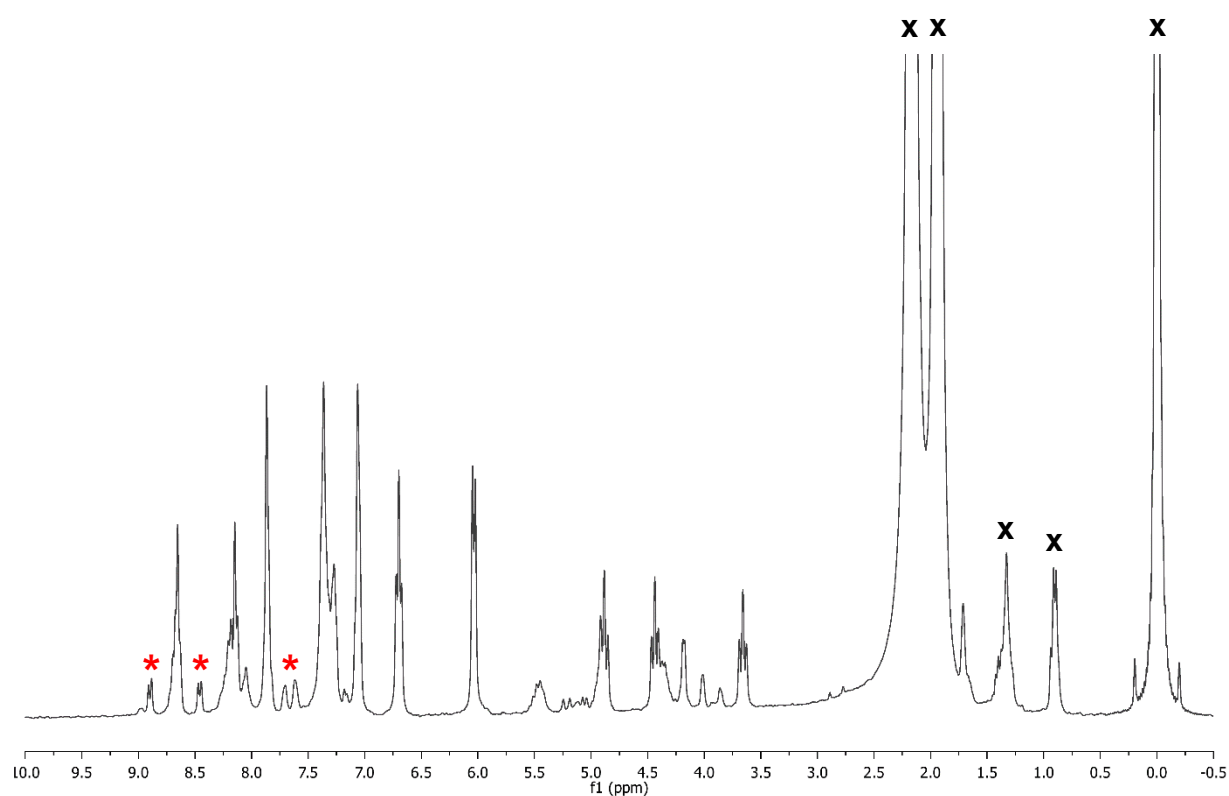

**Figure S30**  $^1\text{H}$  NMR spectrum of **11** ( $\text{CD}_3\text{CN}$ ). Top: full paramagnetic range. Bottom: expansion of the diamagnetic region. The feature at 35 ppm is a spectrometer artefact and the peaks at 0.9 and 1.3 ppm are impurities in the NMR solvent (present in Figures S15-S17, S25, S26, S30 and S31).

There are at least two diamagnetic species in the spectrum. The starred peaks are a good match for  $[\text{Fe}(\text{terpy})_2]^{2+}$ ,<sup>7</sup> which is clearly present since crystals of  $[\text{Fe}(\text{terpy})_2][\text{ClO}_4]_2$  were isolated following recrystallisation of this product. In contrast to **12**, however (Figure S31), there is no evidence for paramagnetic  $[\text{Fe}((R)\text{-}L^1\text{Ph})_2]^{2+}$  in the solution.<sup>4</sup>

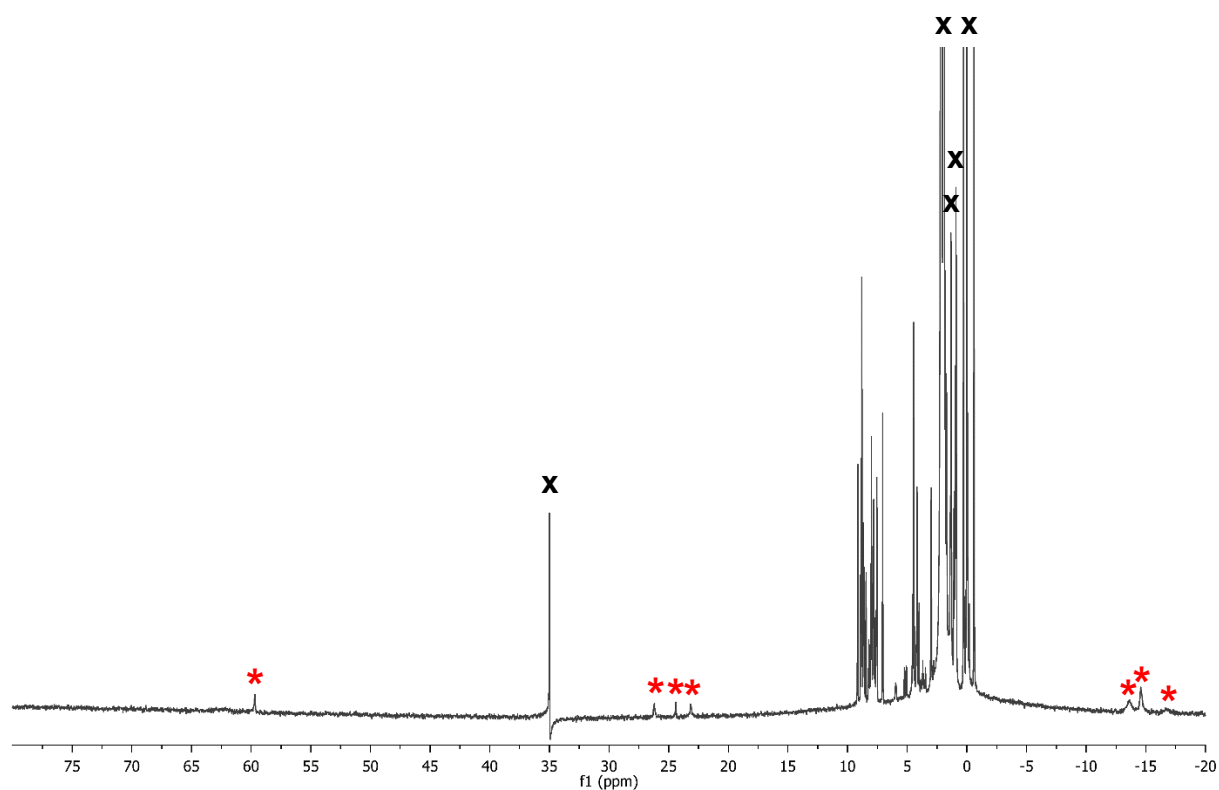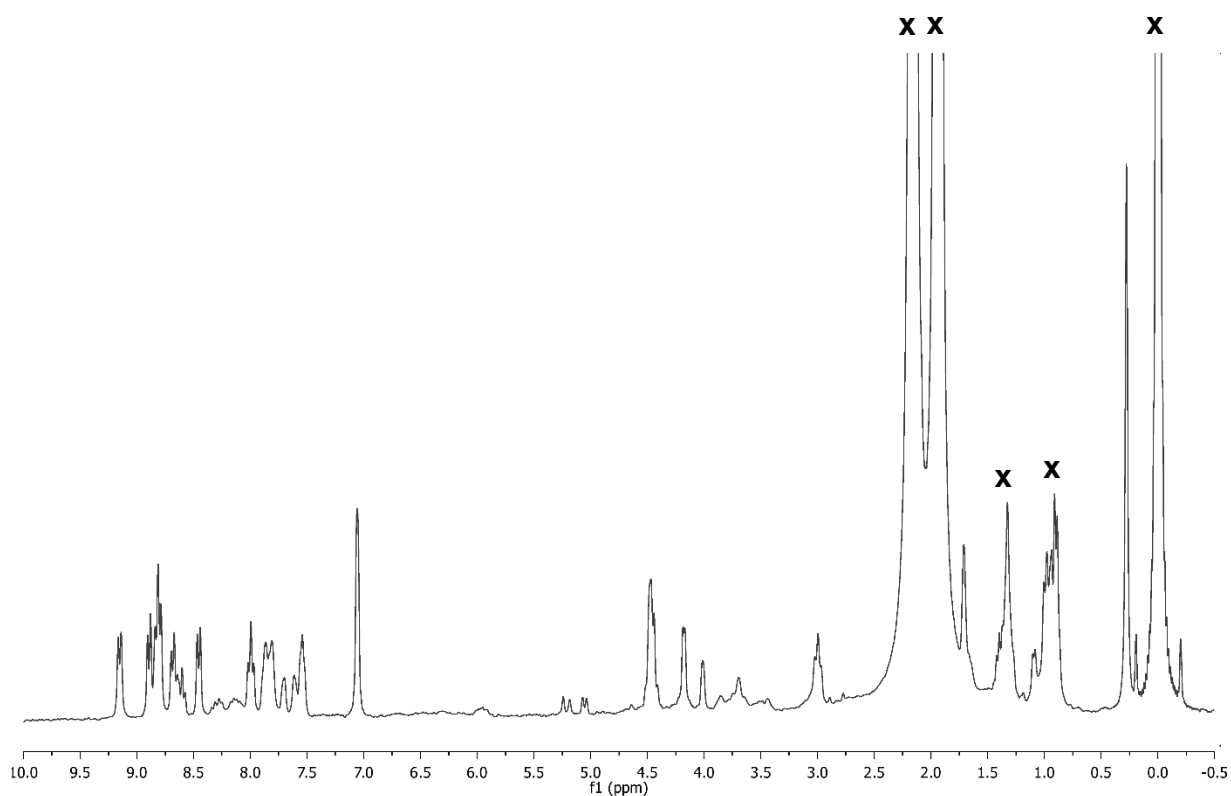

**Figure S31**  $^1\text{H}$  NMR spectrum of **12** ( $\text{CD}_3\text{CN}$ ). Top: full paramagnetic range. Bottom: expansion of the diamagnetic region. The feature at 35 ppm is a spectrometer artefact, and peaks at 0.9 and 1.3 ppm are impurities in the NMR solvent (present in Figures S15-S17, S25, S26, S30 and S31).

The starred paramagnetic peaks are from  $[\text{Fe}((S)\text{-}L^1\text{iPr})_2]^{2+}$ ,<sup>4</sup> which comprises around 10 % of the iron content of the solution. It's less clear whether  $[\text{Fe}(\text{terpy})_2]^{2+}$  is also a component of this mixture (Figure S30),<sup>7</sup> but the peak integrations imply there are three main diamagnetic species in the solution.

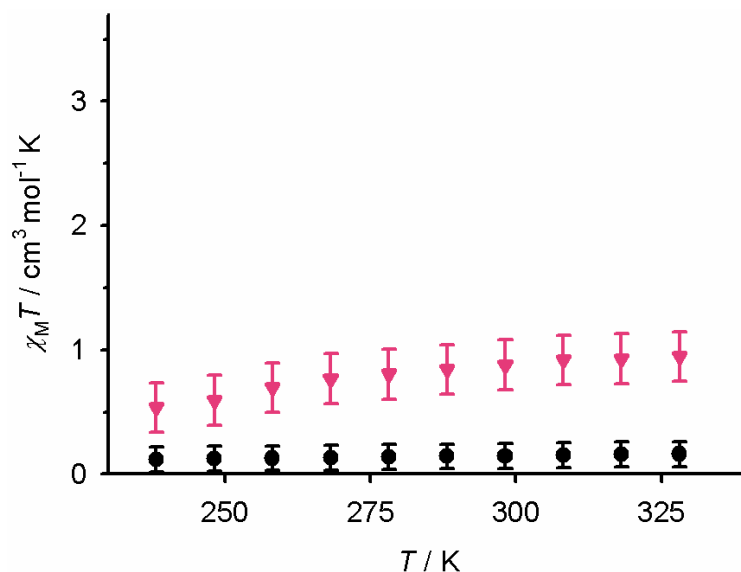

**Figure S32** Magnetic data for **11** (black circles) and **12** (pink triangles) in CD<sub>3</sub>CN solution.

Although their microanalyses are consistent with the formulae [Fe(L<sup>1</sup>R)(terpy)][ClO<sub>4</sub>]<sub>2</sub> (R = Ph, **11**; R = *i*Pr, **12**) the actual composition of these samples is uncertain. No crystal structures were obtained of these compounds, and their NMR spectra contain a mixture of species (Figures S30-S31).

Both **11**<sup>2+</sup> and **12**<sup>2+</sup> are predicted to be low-spin by the DFT calculations, while the ligand exchange product [Fe(terpy)<sub>2</sub>]<sup>2+</sup> is also low-spin and diamagnetic. The non-zero magnetic moment for **12** might be explained by the presence of paramagnetic [Fe((*S*)-L<sup>1</sup>*i*Pr)<sub>2</sub>]<sup>2+</sup>,<sup>4</sup> which is clear as a minor component of its NMR spectrum (Figure S31).

Solution magnetic data for compounds **1-10** are shown in the main article.

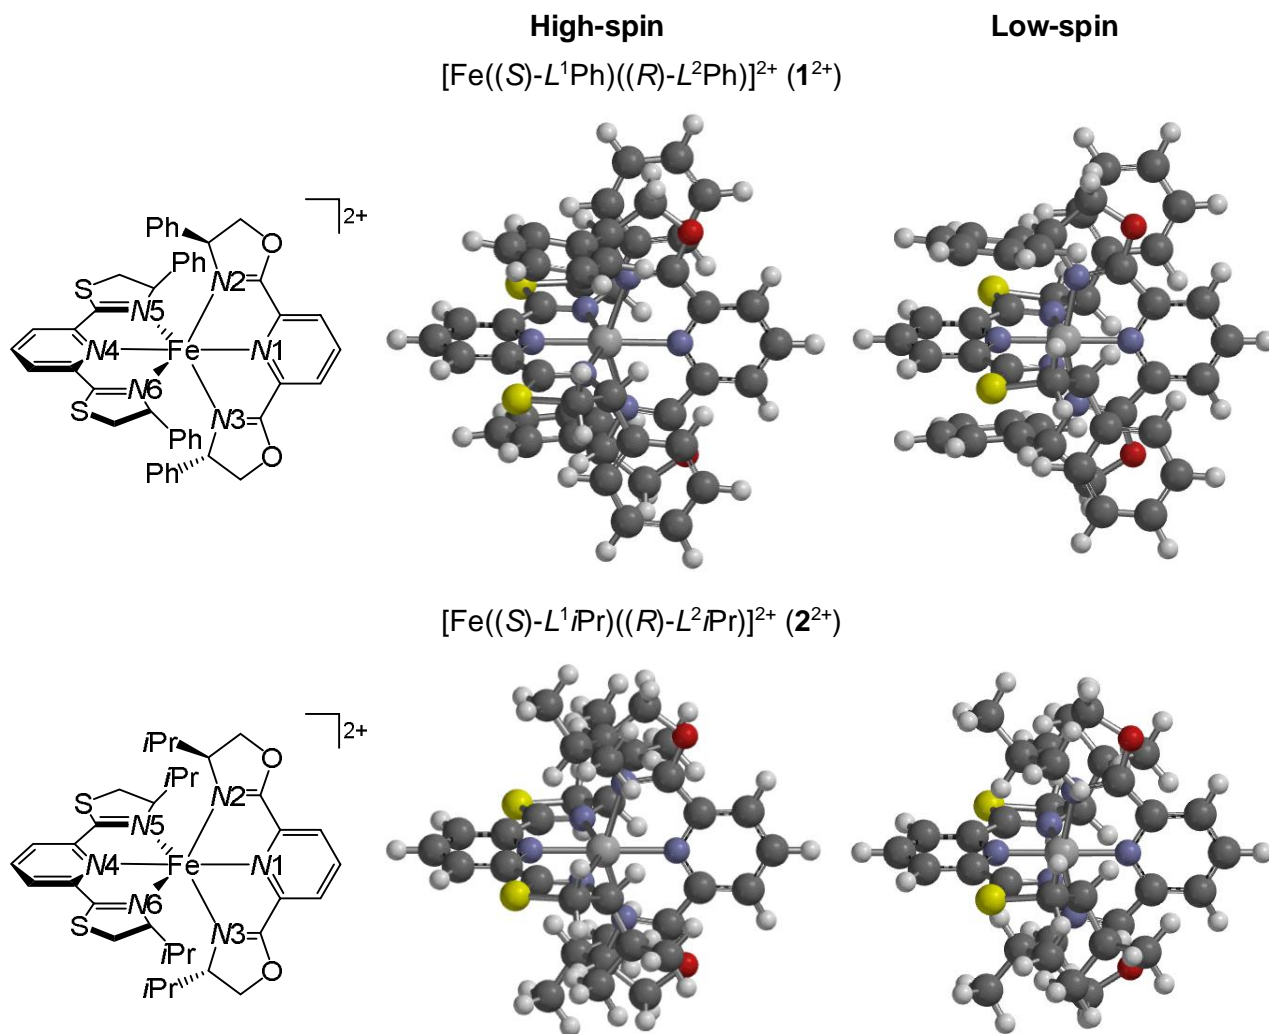

**Figure S33** The DFT energy-minimised structures of the heterochiral  $[\text{Fe}((S)\text{-}L^1\text{R})((R)\text{-}L^2\text{R})]^{2+}$  ( $\text{R} = \text{Ph}$  or  $i\text{Pr}$ ) complexes, showing the atom numbering in Table S8.

Alternative views of these minimised structures are in Figure S34.

**Table S8** Computed metric parameters for the heteroleptic, heterochiral  $[\text{Fe}((S)\text{-}L^1\text{R})((R)\text{-}L^2\text{R})]^{2+}$  complexes ( $\text{\AA}$ ,  $^\circ$ ; Figure S33). Experimental crystallographic data are also included in square brackets for comparison, where this is available.  $\alpha$  is the average bite angle of the tridentate ligands. Definitions of  $\phi$  and  $\theta$  are on page S9, and the atom numbering in the Table is shown in Figure S33.

|          | $[\text{Fe}((S)\text{-}L^1\text{Ph})((R)\text{-}L^2\text{Ph})]^{2+} (\mathbf{1}^{2+})$ |                    | $[\text{Fe}((S)\text{-}L^1\text{iPr})((R)\text{-}L^2\text{iPr})]^{2+} (\mathbf{2}^{2+})$ |                       |
|----------|----------------------------------------------------------------------------------------|--------------------|------------------------------------------------------------------------------------------|-----------------------|
|          | High-spin                                                                              | Low-spin           | High-spin                                                                                | Low-spin <sup>a</sup> |
| Fe–N1    | 2.165                                                                                  | 1.917 [1.915(3)]   | 2.141                                                                                    | 1.917 [1.923(5)]      |
| Fe–N2    | 2.251                                                                                  | 2.017 [1.995(3)]   | 2.249                                                                                    | 2.021 [1.995(5)]      |
| Fe–N3    | 2.231                                                                                  | 2.017 [1.994(3)]   | 2.252                                                                                    | 2.021 [1.999(5)]      |
| Fe–N4    | 2.115                                                                                  | 1.897 [1.884(3)]   | 2.132                                                                                    | 1.898 [1.903(5)]      |
| Fe–N5    | 2.228                                                                                  | 2.004 [1.985(3)]   | 2.270                                                                                    | 2.021 [2.025(5)]      |
| Fe–N6    | 2.220                                                                                  | 2.004 [1.995(3)]   | 2.268                                                                                    | 2.021 [2.014(5)]      |
| N1–Fe–N2 | 73.7                                                                                   | 79.7 [79.45(13)]   | 74.2                                                                                     | 79.7 [78.9(2)]        |
| N1–Fe–N3 | 73.8                                                                                   | 79.7 [79.20(13)]   | 74.1                                                                                     | 79.7 [79.3(2)]        |
| N1–Fe–N4 | 178.5                                                                                  | 180.0 [179.49(15)] | 179.8                                                                                    | 179.9 [178.5(2)]      |
| N1–Fe–N5 | 104.7                                                                                  | 99.9 [100.81(12)]  | 105.6                                                                                    | 99.9 [100.7(2)]       |
| N1–Fe–N6 | 106.4                                                                                  | 99.9 [99.73(12)]   | 105.9                                                                                    | 100.0 [100.4(2)]      |
| N2–Fe–N3 | 147.5                                                                                  | 159.3 [158.64(12)] | 148.3                                                                                    | 159.4 [158.2(2)]      |
| N2–Fe–N4 | 107.4                                                                                  | 100.3 [100.20(13)] | 105.8                                                                                    | 100.2 [102.6(2)]      |
| N2–Fe–N5 | 97.0                                                                                   | 92.7 [93.43(12)]   | 92.9                                                                                     | 92.9 [92.7(2)]        |
| N2–Fe–N6 | 92.0                                                                                   | 90.9 [90.65(12)]   | 95.4                                                                                     | 90.6 [92.3(2)]        |
| N3–Fe–N4 | 105.1                                                                                  | 100.3 [101.15(13)] | 105.8                                                                                    | 100.4 [99.3(2)]       |
| N3–Fe–N5 | 91.8                                                                                   | 90.9 [90.56(13)]   | 95.7                                                                                     | 90.7 [91.4(2)]        |
| N3–Fe–N6 | 96.4                                                                                   | 92.7 [92.95(12)]   | 93.0                                                                                     | 92.9 [91.6(2)]        |
| N4–Fe–N5 | 74.4                                                                                   | 80.1 [79.57(13)]   | 74.2                                                                                     | 80.1 [79.4(2)]        |
| N4–Fe–N6 | 74.6                                                                                   | 80.1 [79.90(13)]   | 74.3                                                                                     | 80.1 [79.4(2)]        |
| N5–Fe–N6 | 149.0                                                                                  | 160.2 [159.46(13)] | 148.5                                                                                    | 160.1 [158.8(2)]      |
| $\alpha$ | 74.1                                                                                   | 79.9 [79.5(2)]     | 74.2                                                                                     | 79.9 [79.3(4)]        |
| $\phi$   | 178.5                                                                                  | 180.0 [179.49(15)] | 179.8                                                                                    | 179.9 [178.5(2)]      |
| $\theta$ | 87.3                                                                                   | 88.5 [89.67(6)]    | 88.8                                                                                     | 88.4 [88.81(9)]       |

<sup>a</sup>Experimental values are from molecule A in the crystal structure of this complex. Experimental bonds and angles involving N5 and N6 have been swapped in the Table, because the crystallographic and computed structures having opposite handedness.

Computed metric parameters for the corresponding homoleptic, heterochiral  $[\text{Fe}((R)\text{-}L^1\text{R})((S)\text{-}L^1\text{R})]^{2+}$  and  $[\text{Fe}((R)\text{-}L^2\text{R})((S)\text{-}L^2\text{R})]^{2+}$  complexes are in ref. 2.



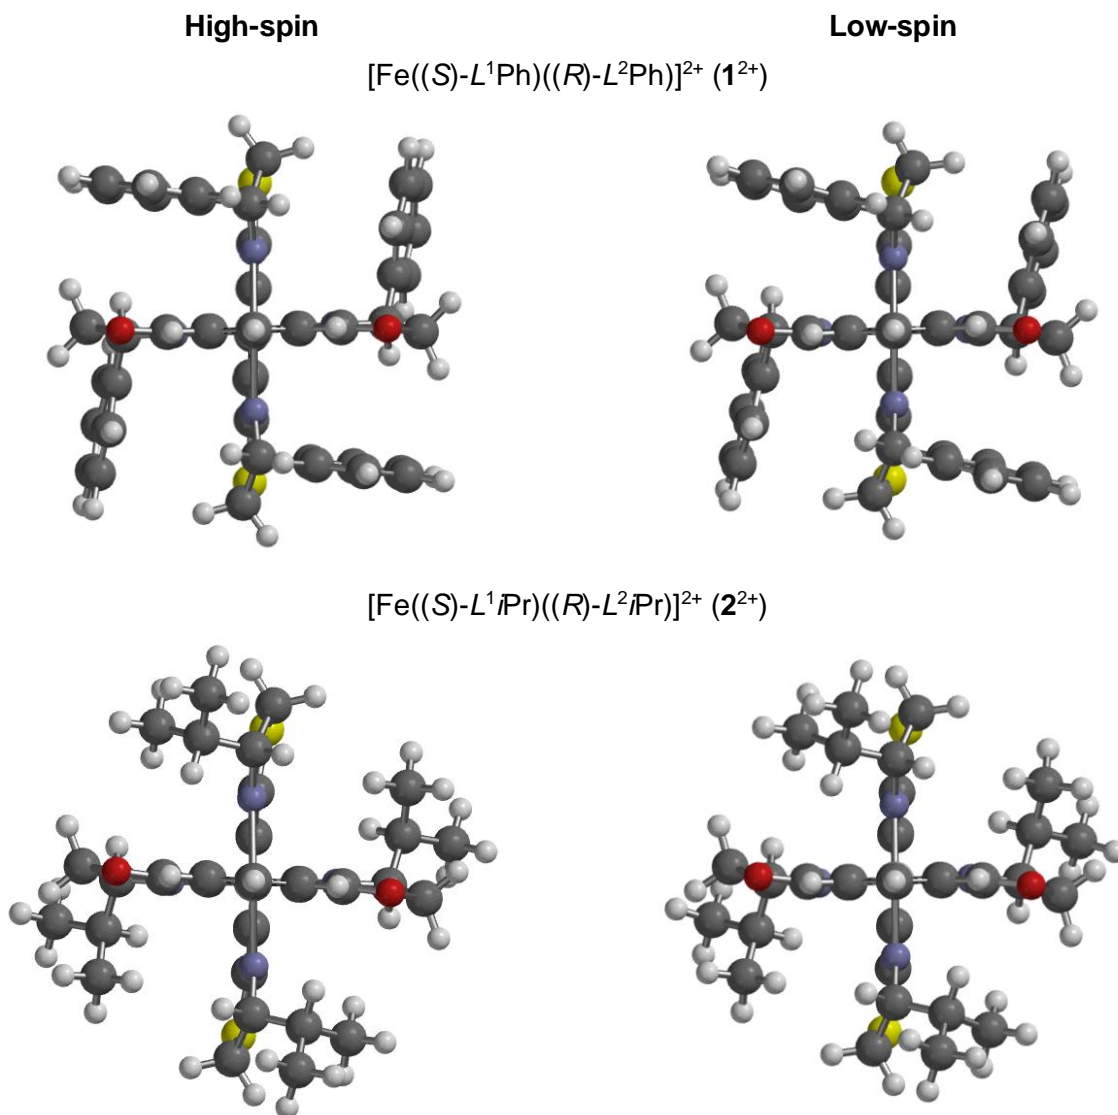

**Figure S34** Alternative views of the DFT energy-minimised structures of the heterochiral  $[\text{Fe}((S)\text{-}L^1\text{R})((R)\text{-}L^2\text{R})]^{2+}$  ( $\text{R} = \text{Ph}$  or  $i\text{Pr}$ ) complexes, emphasising the conformations and orientations of the heterocyclic ligands. Other details as for Figure S33.

Corresponding views of the minimised structures of homoleptic, heterochiral  $[\text{Fe}((R)\text{-}L^1\text{R})((S)\text{-}L^1\text{R})]^{2+}$  and  $[\text{Fe}((R)\text{-}L^2\text{R})((S)\text{-}L^2\text{R})]^{2+}$  complexes are in ref. 2. The conformations of minimised  $\mathbf{1}^{2+}$  and  $\mathbf{2}^{2+}$  closely resemble their homoleptic counterparts.

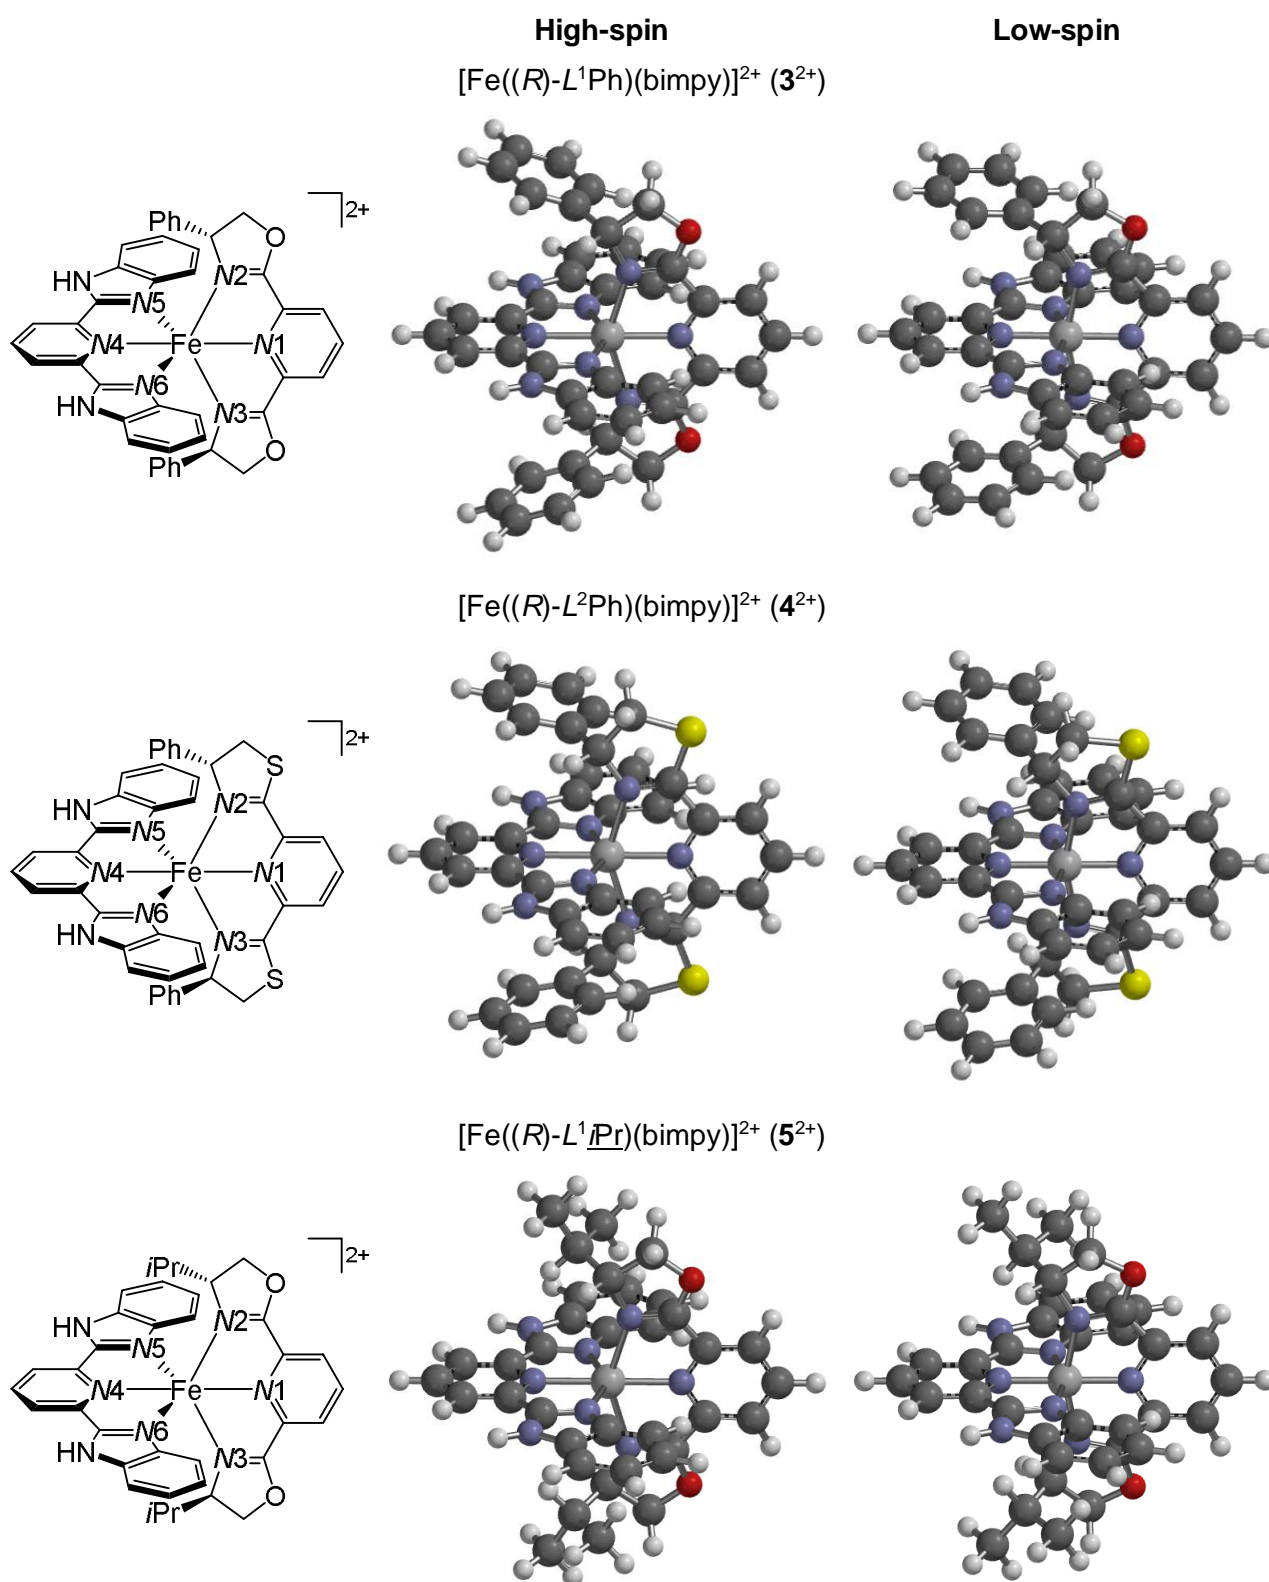

**Figure S35** DFT energy-minimised structures of the heteroleptic  $[\text{Fe}(\text{LR})\text{L}]^{2+}$  ( $\text{L} = \text{bimpy}, \text{bpp}$  or  $\text{terpy}$ ) complexes, showing the atom numbering in Table S9. Details as for Figure S33.

Alternative views of these minimised structures are in Figure S36.

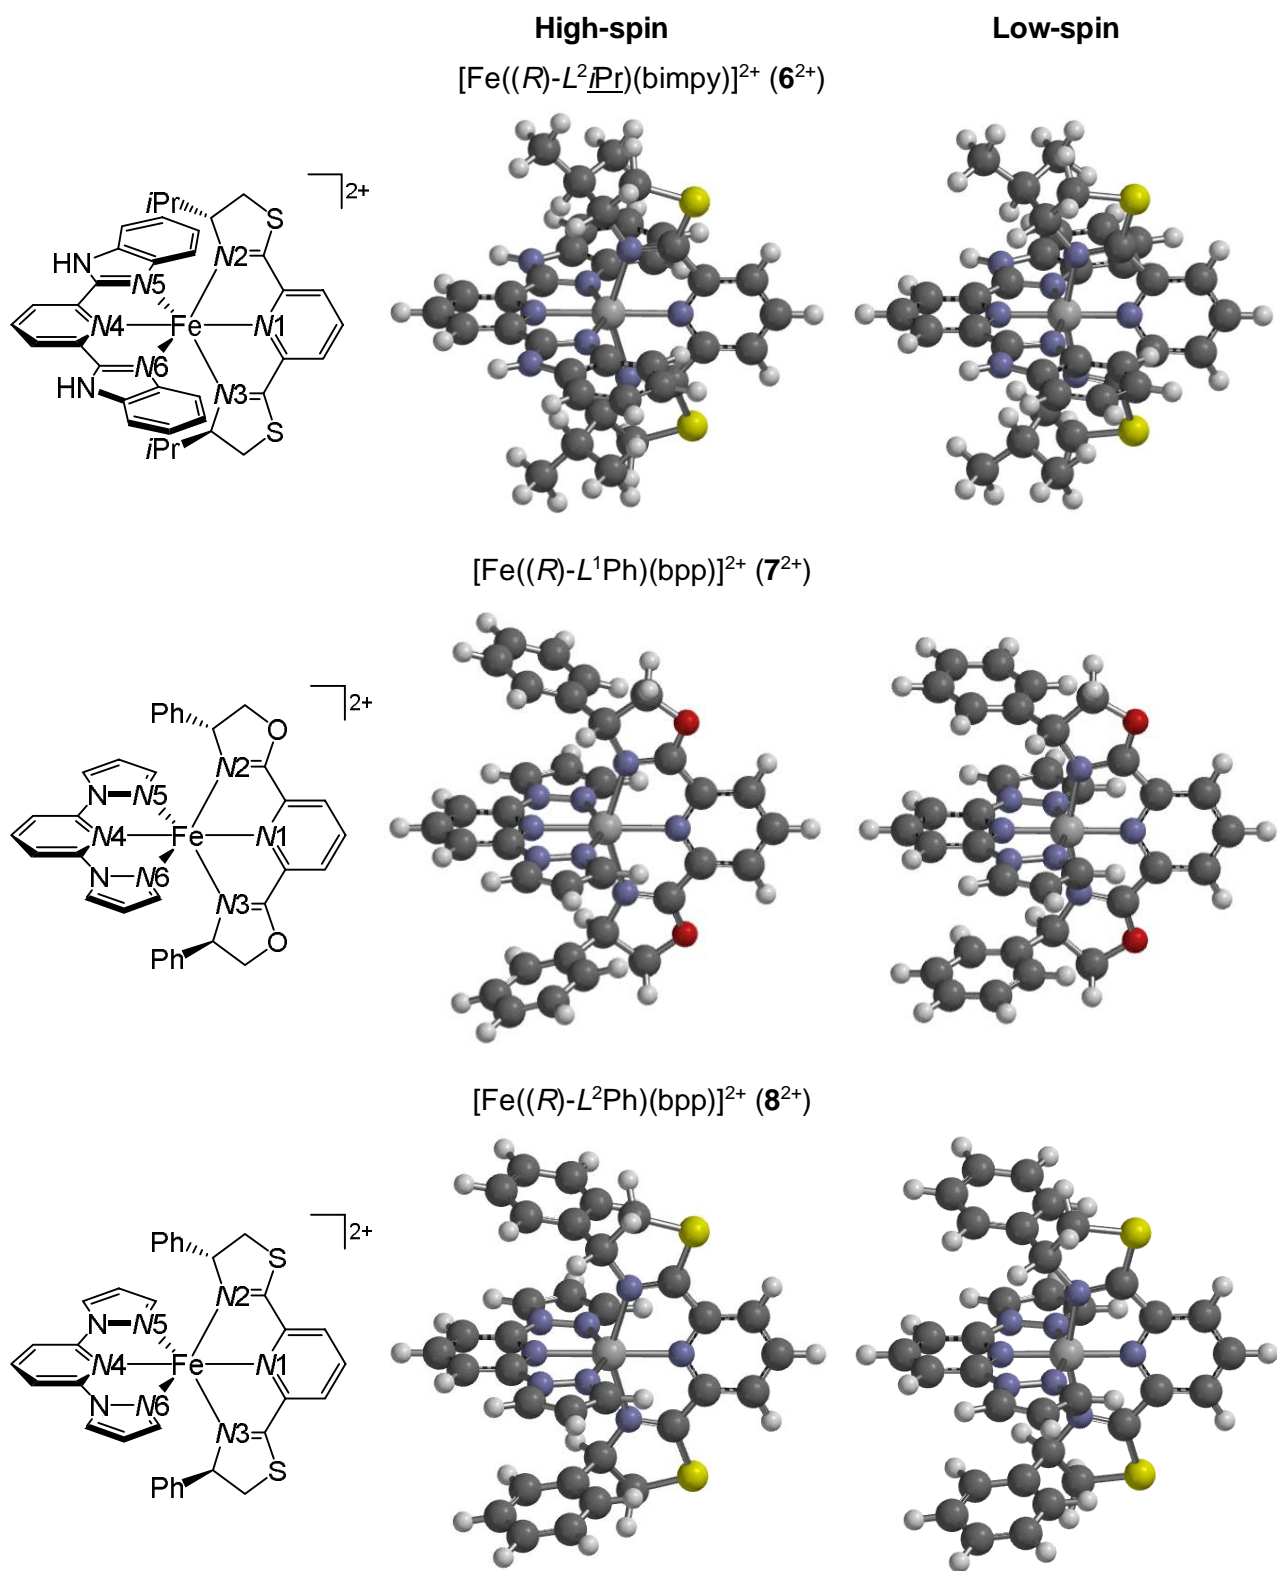

Figure S35 continued.

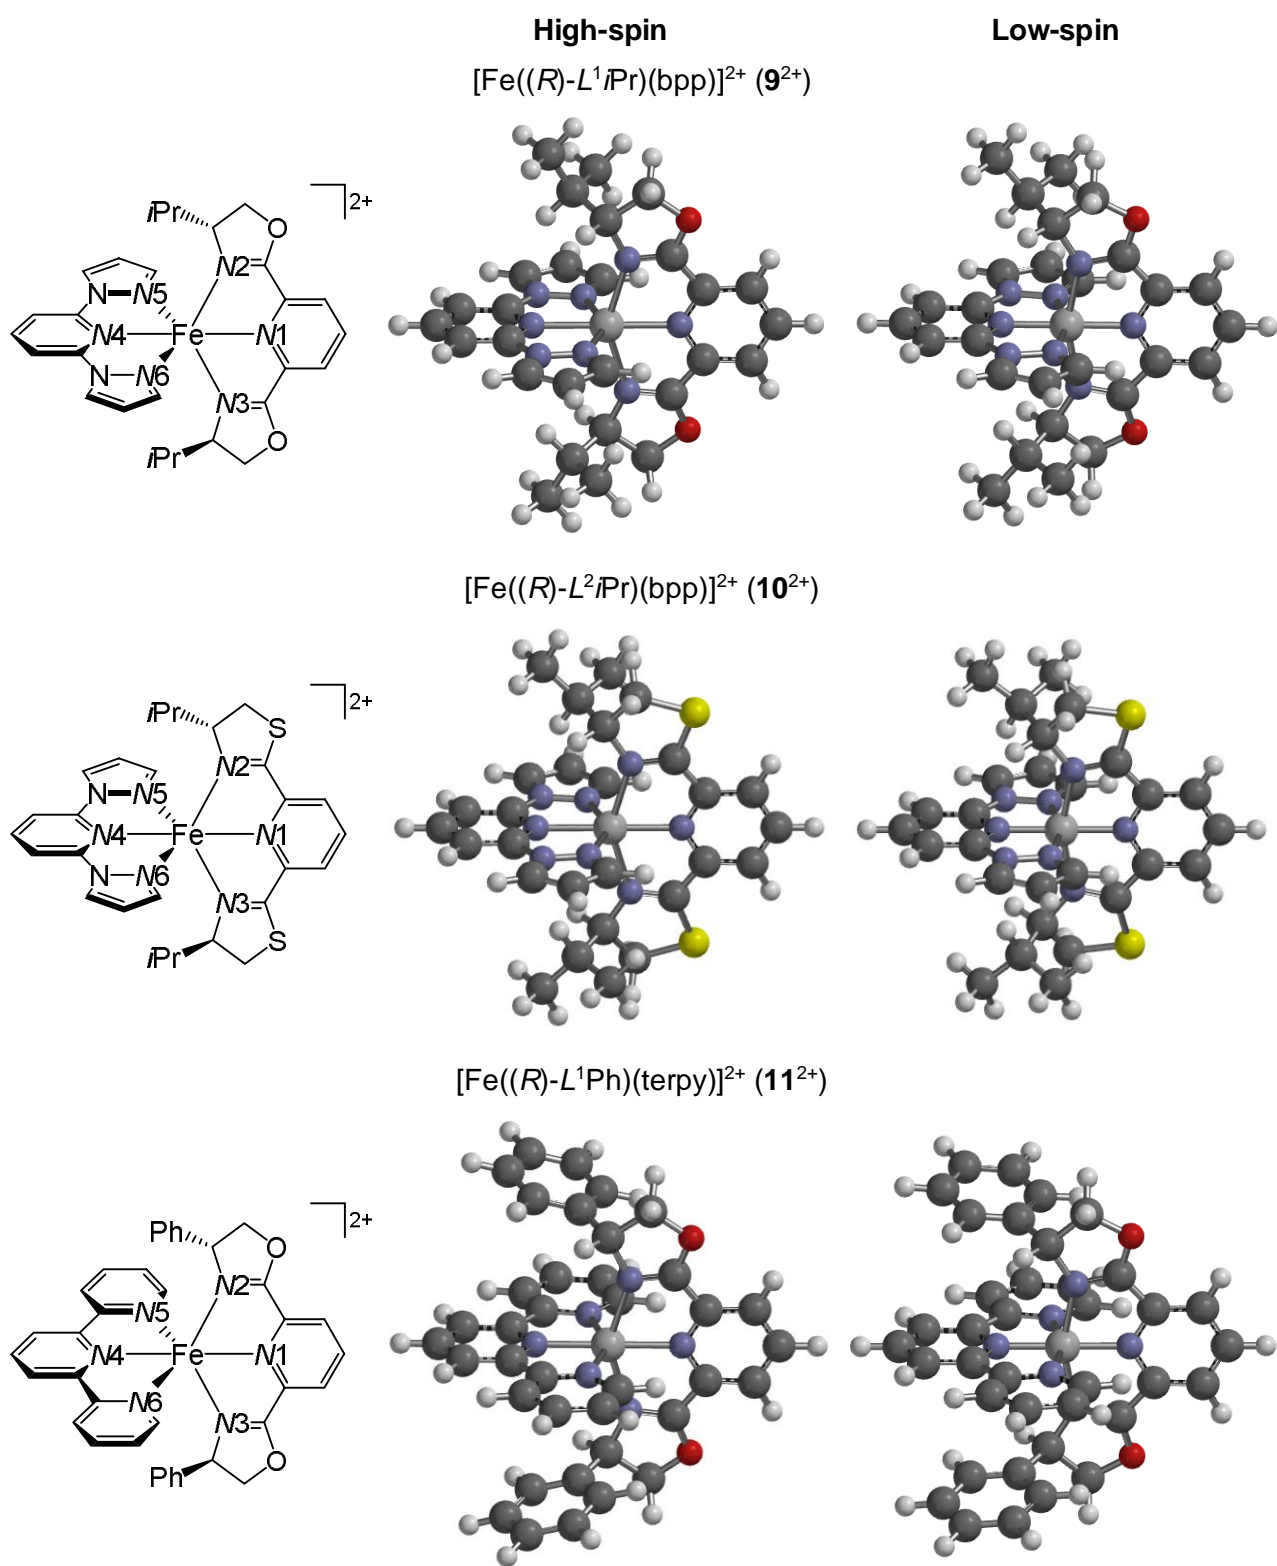

Figure S35 continued.

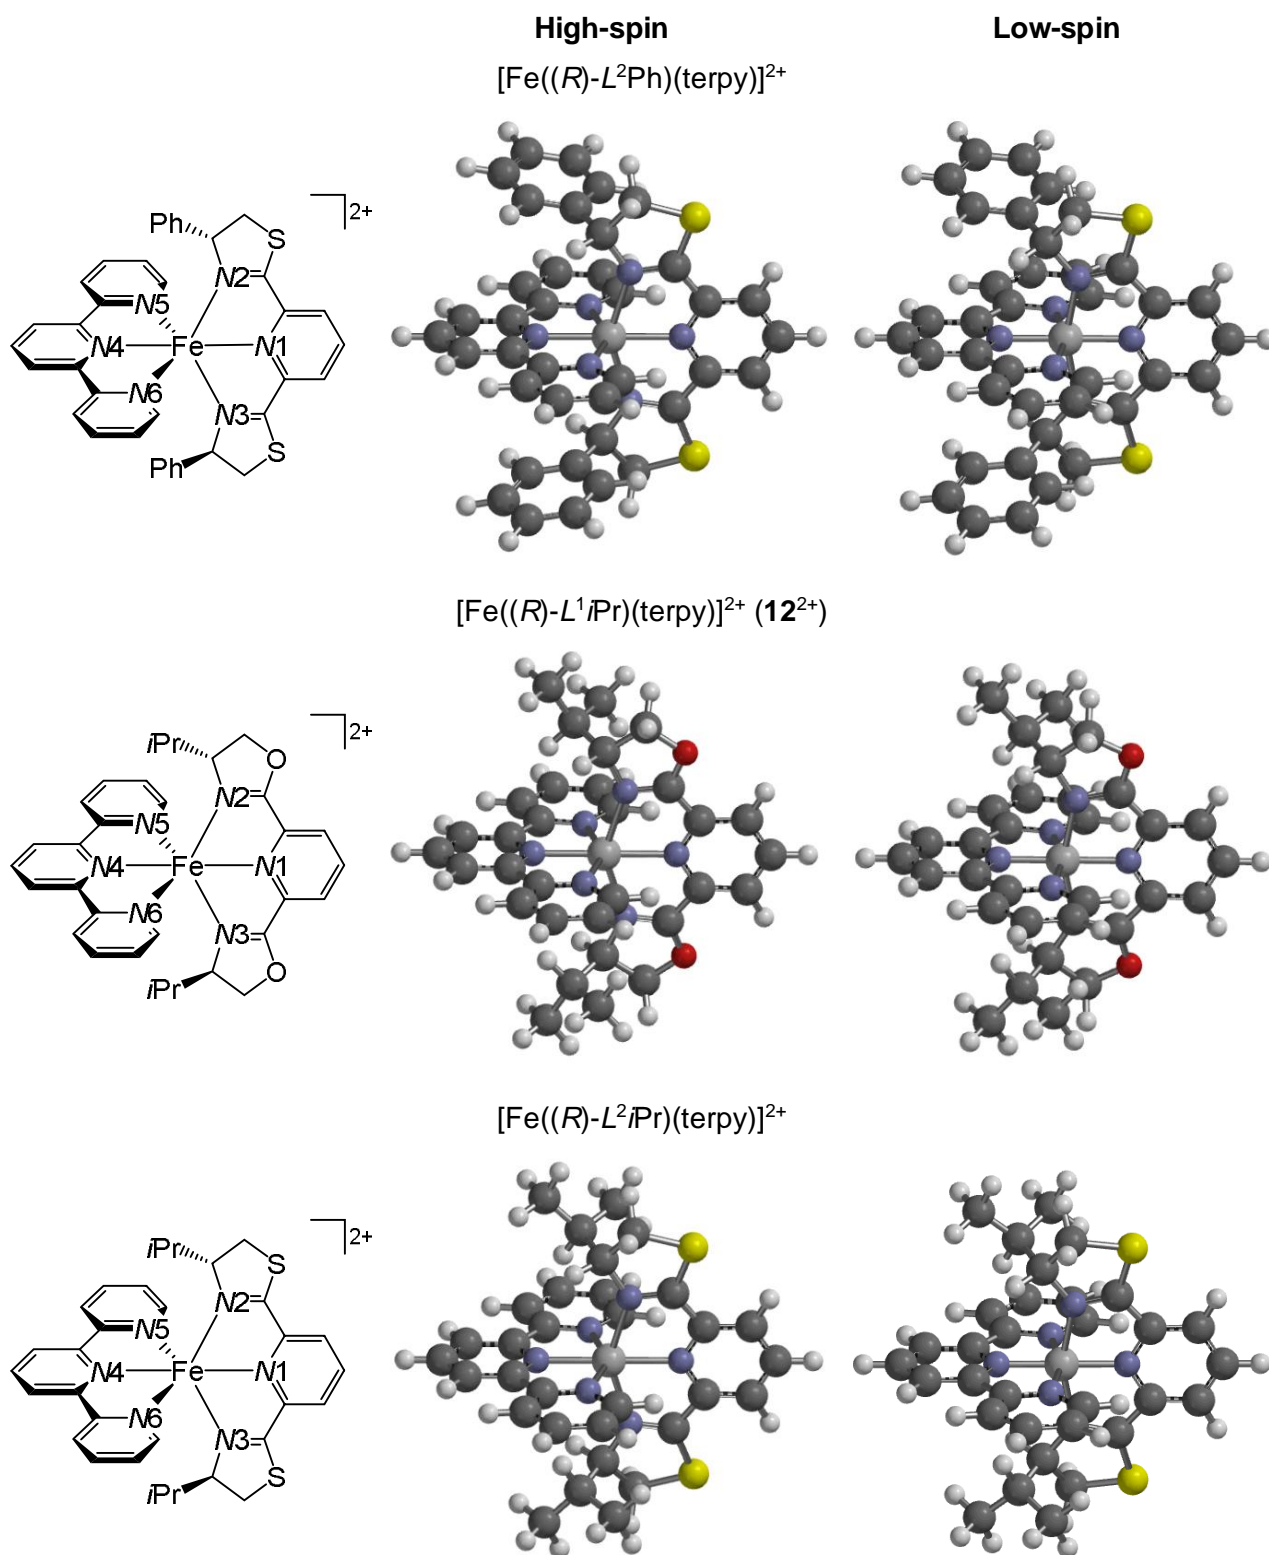

Figure S35 continued.

**Table S9** Computed metric parameters for the heteroleptic  $[\text{Fe}(\text{LR})\text{L}]^{2+}$  complexes (Å, °; Figure S43). Experimental crystallographic data are also included in square brackets for comparison, where this is available.  $\alpha$  is the average bite angle of the tridentate ligands. Definitions of  $\phi$  and  $\theta$  are on page S9, and the atom numbering in the Table is shown in Figure S35.

|          | $[\text{Fe}((R)\text{-}L^1\text{Ph})(\text{bimpy})]^{2+}$ ( $3^{2+}$ ) |                       | $[\text{Fe}((R)\text{-}L^2\text{Ph})(\text{bimpy})]^{2+}$ ( $4^{2+}$ ) |                    | $[\text{Fe}((R)\text{-}L^1\text{iPr})(\text{bimpy})]^{2+}$ ( $5^{2+}$ ) |          |
|----------|------------------------------------------------------------------------|-----------------------|------------------------------------------------------------------------|--------------------|-------------------------------------------------------------------------|----------|
|          | High-spin                                                              | Low-spin <sup>a</sup> | High-spin                                                              | Low-spin           | High-spin                                                               | Low-spin |
| Fe–N1    | 2.128                                                                  | 1.908 [1.900(8)]      | 2.103                                                                  | 1.891 [1.8795(13)] | 2.133                                                                   | 1.911    |
| Fe–N2    | 2.227                                                                  | 2.006 [1.983(8)]      | 2.211                                                                  | 1.991 [1.9739(14)] | 2.251                                                                   | 2.010    |
| Fe–N3    | 2.226                                                                  | 2.006 [1.979(7)]      | 2.212                                                                  | 1.991 [1.9574(13)] | 2.250                                                                   | 2.010    |
| Fe–N4    | 2.182                                                                  | 1.926 [1.934(8)]      | 2.184                                                                  | 1.928 [1.9322(13)] | 2.181                                                                   | 1.925    |
| Fe–N5    | 2.226                                                                  | 2.008 [2.035(8)]      | 2.226                                                                  | 2.008 [1.9813(13)] | 2.225                                                                   | 2.010    |
| Fe–N6    | 2.227                                                                  | 2.009 [2.006(8)]      | 2.226                                                                  | 2.009 [1.9937(13)] | 2.227                                                                   | 2.010    |
| N1–Fe–N2 | 74.2                                                                   | 79.9 [79.4(3)]        | 74.5                                                                   | 80.3 [80.14(6)]    | 74.2                                                                    | 79.8     |
| N1–Fe–N3 | 74.2                                                                   | 79.9 [79.5(3)]        | 74.5                                                                   | 80.3 [79.63(6)]    | 74.3                                                                    | 79.9     |
| N1–Fe–N4 | 179.8                                                                  | 180.0 [177.8(4)]      | 179.9                                                                  | 179.9 [179.60(6)]  | 179.7                                                                   | 179.9    |
| N1–Fe–N5 | 105.8                                                                  | 99.8 [99.1(3)]        | 105.6                                                                  | 99.7 [100.13(6)]   | 105.9                                                                   | 99.8     |
| N1–Fe–N6 | 105.7                                                                  | 99.7 [102.1(3)]       | 105.9                                                                  | 99.9 [100.61(6)]   | 105.8                                                                   | 99.7     |
| N2–Fe–N3 | 148.4                                                                  | 159.8 [158.7(3)]      | 149.1                                                                  | 160.6 [159.70(6)]  | 148.4                                                                   | 159.7    |
| N2–Fe–N4 | 105.6                                                                  | 100.1 [102.6(3)]      | 105.5                                                                  | 99.8 [100.08(6)]   | 105.6                                                                   | 100.2    |
| N2–Fe–N5 | 99.3                                                                   | 92.8 [92.4(3)]        | 98.1                                                                   | 94.3 [92.27(5)]    | 100.2                                                                   | 94.1     |
| N2–Fe–N6 | 89.2                                                                   | 90.5 [90.2(3)]        | 90.2                                                                   | 89.0 [93.19(6)]    | 88.1                                                                    | 89.3     |
| N3–Fe–N4 | 106.0                                                                  | 100.1 [98.6(3)]       | 105.4                                                                  | 99.7 [100.14(5)]   | 106.0                                                                   | 100.1    |
| N3–Fe–N5 | 89.2                                                                   | 90.5 [92.7(3)]        | 90.2                                                                   | 89.0 [89.61(5)]    | 88.3                                                                    | 89.3     |
| N3–Fe–N6 | 99.4                                                                   | 92.9 [92.5(3)]        | 98.2                                                                   | 94.4 [92.18(6)]    | 100.5                                                                   | 94.2     |
| N4–Fe–N5 | 74.3                                                                   | 80.3 [79.9(3)]        | 74.3                                                                   | 80.2 [79.54(5)]    | 74.2                                                                    | 80.3     |
| N4–Fe–N6 | 74.2                                                                   | 80.3 [78.9(3)]        | 74.2                                                                   | 80.2 [79.72(5)]    | 74.2                                                                    | 80.3     |
| N5–Fe–N6 | 148.5                                                                  | 160.5 [158.7(3)]      | 148.5                                                                  | 160.4 [159.17(5)]  | 148.4                                                                   | 160.5    |
| $a$      | 74.2                                                                   | 80.1 [79.4(6)]        | 74.4                                                                   | 80.3 [79.75(12)]   | 74.2                                                                    | 80.1     |
| $\phi$   | 179.8                                                                  | 180.0 [177.8(4)]      | 179.9                                                                  | 179.9 [179.60(6)]  | 179.7                                                                   | 179.9    |
| $\theta$ | 83.6                                                                   | 88.8 [88.21(14)]      | 87.2                                                                   | 86.6 [88.00(3)]    | 82.4                                                                    | 85.4     |

<sup>a</sup>Experimental values are from molecule A in the crystal structure of this complex. <sup>b</sup>Experimental bonds and angles involving N5 and N6 have been swapped for this compound, because the crystallographic and computed structures having opposite handedness.

**Table S9** continued.

|          | [Fe(( <i>R</i> )- <i>L</i> <sup>2</sup> iPr)(bimpy)] <sup>2+</sup> ( <b>6</b> <sup>2+</sup> ) |                       | [Fe(( <i>R</i> )- <i>L</i> <sup>1</sup> Ph)(bpp)] <sup>2+</sup> ( <b>7</b> <sup>2+</sup> ) |          | [Fe(( <i>R</i> )- <i>L</i> <sup>2</sup> Ph)(bpp)] <sup>2+</sup> ( <b>8</b> <sup>2+</sup> ) |                    |
|----------|-----------------------------------------------------------------------------------------------|-----------------------|--------------------------------------------------------------------------------------------|----------|--------------------------------------------------------------------------------------------|--------------------|
|          | High-spin                                                                                     | Low-spin <sup>b</sup> | High-spin                                                                                  | Low-spin | High-spin                                                                                  | Low-spin           |
| Fe–N1    | 2.109                                                                                         | 1.896 [1.881(5)]      | 2.126                                                                                      | 1.913    | 2.104                                                                                      | 1.896 [1.879(4)]   |
| Fe–N2    | 2.244                                                                                         | 2.001 [1.995(5)]      | 2.219                                                                                      | 2.012    | 2.205                                                                                      | 1.999 [1.978(4)]   |
| Fe–N3    | 2.241                                                                                         | 2.001 [2.001(6)]      | 2.221                                                                                      | 2.012    | 2.205                                                                                      | 2.000 [1.992(4)]   |
| Fe–N4    | 2.190                                                                                         | 1.927 [1.913(5)]      | 2.169                                                                                      | 1.905    | 2.165                                                                                      | 1.905 [1.906(4)]   |
| Fe–N5    | 2.227                                                                                         | 2.011 [1.983(5)]      | 2.217                                                                                      | 1.973    | 2.214                                                                                      | 1.974 [1.954(4)]   |
| Fe–N6    | 2.229                                                                                         | 2.011 [1.992(5)]      | 2.216                                                                                      | 1.973    | 2.214                                                                                      | 1.974 [1.961(4)]   |
| N1–Fe–N2 | 74.5                                                                                          | 80.2 [80.4(2)]        | 74.3                                                                                       | 79.9     | 74.6                                                                                       | 80.3 [80.40(17)]   |
| N1–Fe–N3 | 74.5                                                                                          | 80.2 [79.8(2)]        | 74.3                                                                                       | 79.9     | 74.6                                                                                       | 80.3 [79.76(17)]   |
| N1–Fe–N4 | 179.6                                                                                         | 179.9 [175.2(2)]      | 179.7                                                                                      | 180.0    | 180.0                                                                                      | 179.9 [176.77(17)] |
| N1–Fe–N5 | 106.3                                                                                         | 99.9 [103.7(2)]       | 106.7                                                                                      | 99.9     | 106.6                                                                                      | 100.1 [97.99(17)]  |
| N1–Fe–N6 | 105.9                                                                                         | 99.8 [96.1(2)]        | 106.9                                                                                      | 100.0    | 106.6                                                                                      | 99.9 [102.29(17)]  |
| N2–Fe–N3 | 149.0                                                                                         | 160.3 [160.1(2)]      | 148.6                                                                                      | 159.9    | 149.3                                                                                      | 160.7 [160.10(17)] |
| N2–Fe–N4 | 105.2                                                                                         | 99.9 [96.3(2)]        | 106.0                                                                                      | 100.1    | 105.4                                                                                      | 99.6 [97.34(17)]   |
| N2–Fe–N5 | 100.3                                                                                         | 95.1 [93.3(2)]        | 99.1                                                                                       | 92.9     | 98.6                                                                                       | 94.3 [94.22(15)]   |
| N2–Fe–N6 | 88.3                                                                                          | 88.2 [90.7(2)]        | 90.0                                                                                       | 90.6     | 90.2                                                                                       | 89.1 [89.62(16)]   |
| N3–Fe–N4 | 105.9                                                                                         | 99.8 [103.5(2)]       | 105.5                                                                                      | 100.1    | 105.4                                                                                      | 99.7 [102.54(17)]  |
| N3–Fe–N5 | 88.2                                                                                          | 88.2 [89.7(2)]        | 90.0                                                                                       | 90.5     | 90.2                                                                                       | 89.1 [90.14(16)]   |
| N3–Fe–N6 | 100.3                                                                                         | 95.2 [93.2(2)]        | 99.0                                                                                       | 92.9     | 98.6                                                                                       | 94.3 [92.99(16)]   |
| N4–Fe–N5 | 73.9                                                                                          | 80.2 [79.9(2)]        | 73.2                                                                                       | 80.0     | 73.4                                                                                       | 80.0 [79.81(16)]   |
| N4–Fe–N6 | 73.9                                                                                          | 80.2 [80.3(2)]        | 73.2                                                                                       | 80.0     | 73.4                                                                                       | 80.0 [79.94(17)]   |
| N5–Fe–N6 | 147.8                                                                                         | 160.4 [160.2(2)]      | 146.4                                                                                      | 160.1    | 146.7                                                                                      | 160.0 [159.72(17)] |
| <i>a</i> | 74.2                                                                                          | 80.2 [80.1(4)]        | 73.8                                                                                       | 80.0     | 74.0                                                                                       | 80.2 [80.0(3)]     |
| <i>φ</i> | 179.6                                                                                         | 179.9 [175.2(2)]      | 179.7                                                                                      | 180.0    | 180.0                                                                                      | 179.9 [176.77(17)] |
| <i>θ</i> | 81.9                                                                                          | 84.4 [85.11(8)]       | 84.5                                                                                       | 88.3     | 85.3                                                                                       | 86.2 [85.97(7)]    |

<sup>a</sup>Experimental values are from molecule A in the crystal structure of this complex. <sup>b</sup>Experimental bonds and angles involving N5 and N6 have been swapped for this compound, because the crystallographic and computed structures having opposite handedness.

Table S9 continued.

|          | [Fe( <i>R</i> )- <i>L</i> <sup>1</sup> iPr)(bpp)] <sup>2+</sup> ( <b>9</b> <sup>2+</sup> ) |                       | [Fe( <i>R</i> )- <i>L</i> <sup>2</sup> iPr)(bpp)] <sup>2+</sup> ( <b>10</b> <sup>2+</sup> ) |          | [Fe( <i>R</i> )- <i>L</i> <sup>1</sup> Ph)(terpy)] <sup>2+</sup> ( <b>11</b> <sup>2+</sup> ) |          |
|----------|--------------------------------------------------------------------------------------------|-----------------------|---------------------------------------------------------------------------------------------|----------|----------------------------------------------------------------------------------------------|----------|
|          | High-spin                                                                                  | Low-spin <sup>a</sup> | High-spin                                                                                   | Low-spin | High-spin                                                                                    | Low-spin |
| Fe–N1    | 2.124                                                                                      | 1.916                 | 2.106                                                                                       | 1.899    | 2.134                                                                                        | 1.916    |
| Fe–N2    | 2.235                                                                                      | 2.019                 | 2.231                                                                                       | 2.010    | 2.227                                                                                        | 1.999    |
| Fe–N3    | 2.235                                                                                      | 2.019                 | 2.229                                                                                       | 2.010    | 2.227                                                                                        | 1.999    |
| Fe–N4    | 2.178                                                                                      | 1.901                 | 2.183                                                                                       | 1.905    | 2.128                                                                                        | 1.892    |
| Fe–N5    | 2.220                                                                                      | 1.975                 | 2.221                                                                                       | 1.976    | 2.226                                                                                        | 1.997    |
| Fe–N6    | 2.220                                                                                      | 1.975                 | 2.221                                                                                       | 1.976    | 2.226                                                                                        | 1.997    |
| N1–Fe–N2 | 74.4                                                                                       | 79.9                  | 74.6                                                                                        | 80.2     | 74.1                                                                                         | 79.8     |
| N1–Fe–N3 | 74.4                                                                                       | 79.9                  | 74.6                                                                                        | 80.2     | 74.1                                                                                         | 79.8     |
| N1–Fe–N4 | 179.7                                                                                      | 180.0                 | 179.8                                                                                       | 180.0    | 180.0                                                                                        | 180.0    |
| N1–Fe–N5 | 106.7                                                                                      | 99.9                  | 107.3                                                                                       | 100.1    | 104.9                                                                                        | 98.9     |
| N1–Fe–N6 | 107.4                                                                                      | 100.0                 | 107.0                                                                                       | 100.0    | 104.9                                                                                        | 98.9     |
| N2–Fe–N3 | 148.8                                                                                      | 159.8                 | 149.3                                                                                       | 160.5    | 148.1                                                                                        | 159.6    |
| N2–Fe–N4 | 105.6                                                                                      | 100.1                 | 105.3                                                                                       | 99.8     | 105.9                                                                                        | 100.2    |
| N2–Fe–N5 | 99.8                                                                                       | 94.2                  | 100.2                                                                                       | 94.7     | 98.0                                                                                         | 93.7     |
| N2–Fe–N6 | 89.3                                                                                       | 89.3                  | 88.8                                                                                        | 88.7     | 90.1                                                                                         | 89.4     |
| N3–Fe–N4 | 105.6                                                                                      | 100.1                 | 105.5                                                                                       | 99.8     | 105.9                                                                                        | 100.2    |
| N3–Fe–N5 | 89.3                                                                                       | 89.2                  | 88.8                                                                                        | 88.7     | 90.1                                                                                         | 89.4     |
| N3–Fe–N6 | 99.7                                                                                       | 94.2                  | 100.2                                                                                       | 94.7     | 98.0                                                                                         | 93.7     |
| N4–Fe–N5 | 73.0                                                                                       | 80.1                  | 72.8                                                                                        | 80.0     | 75.1                                                                                         | 81.1     |
| N4–Fe–N6 | 73.0                                                                                       | 80.1                  | 72.9                                                                                        | 80.0     | 75.1                                                                                         | 81.1     |
| N5–Fe–N6 | 145.9                                                                                      | 160.1                 | 145.7                                                                                       | 159.9    | 150.2                                                                                        | 162.1    |
| <i>a</i> | 73.7                                                                                       | 80.0                  | 73.7                                                                                        | 80.1     | 74.6                                                                                         | 80.5     |
| <i>φ</i> | 179.7                                                                                      | 180.0                 | 179.8                                                                                       | 180.0    | 180.0                                                                                        | 180.0    |
| <i>θ</i> | 83.2                                                                                       | 85.1                  | 83.0                                                                                        | 84.4     | 84.5                                                                                         | 85.9     |

<sup>a</sup>Experimental values are from molecule A in the crystal structure of this complex. <sup>b</sup>Experimental bonds and angles involving N5 and N6 have been swapped for this compound, because the crystallographic and computed structures having opposite handedness.



Table S9 continued.

|          | [Fe(( <i>R</i> )- <i>L</i> <sup>2</sup> Ph)(terpy)] <sup>2+</sup> |                       | [Fe(( <i>R</i> )- <i>L</i> <sup>1</sup> <i>i</i> Pr)(terpy)] <sup>2+</sup> ( <b>12</b> <sup>2+</sup> ) |          | [Fe(( <i>R</i> )- <i>L</i> <sup>2</sup> <i>i</i> Pr)(terpy)] <sup>2+</sup> |          |
|----------|-------------------------------------------------------------------|-----------------------|--------------------------------------------------------------------------------------------------------|----------|----------------------------------------------------------------------------|----------|
|          | High-spin                                                         | Low-spin <sup>a</sup> | High-spin                                                                                              | Low-spin | High-spin                                                                  | Low-spin |
| Fe–N1    | 2.112                                                             | 1.900                 | 2.139                                                                                                  | 1.921    | 2.124                                                                      | 1.906    |
| Fe–N2    | 2.221                                                             | 2.000                 | 2.239                                                                                                  | 2.007    | 2.235                                                                      | 2.011    |
| Fe–N3    | 2.221                                                             | 2.000                 | 2.239                                                                                                  | 2.007    | 2.235                                                                      | 2.011    |
| Fe–N4    | 2.130                                                             | 1.895                 | 2.129                                                                                                  | 1.893    | 2.136                                                                      | 1.894    |
| Fe–N5    | 2.227                                                             | 1.998                 | 2.230                                                                                                  | 1.995    | 2.226                                                                      | 1.995    |
| Fe–N6    | 2.227                                                             | 1.998                 | 2.230                                                                                                  | 1.995    | 2.226                                                                      | 1.995    |
| N1–Fe–N2 | 74.3                                                              | 80.1                  | 74.1                                                                                                   | 79.7     | 74.2                                                                       | 80.0     |
| N1–Fe–N3 | 74.3                                                              | 80.1                  | 74.1                                                                                                   | 79.7     | 74.2                                                                       | 80.0     |
| N1–Fe–N4 | 180.0                                                             | 180.0                 | 180.0                                                                                                  | 180.0    | 180.0                                                                      | 180.0    |
| N1–Fe–N5 | 105.0                                                             | 99.0                  | 105.1                                                                                                  | 99.0     | 105.3                                                                      | 99.1     |
| N1–Fe–N6 | 105.0                                                             | 99.0                  | 105.1                                                                                                  | 99.0     | 105.3                                                                      | 99.1     |
| N2–Fe–N3 | 148.6                                                             | 160.2                 | 148.3                                                                                                  | 159.4    | 148.4                                                                      | 160.0    |
| N2–Fe–N4 | 105.7                                                             | 99.9                  | 105.9                                                                                                  | 100.3    | 105.8                                                                      | 100.0    |
| N2–Fe–N5 | 99.1                                                              | 94.7                  | 99.9                                                                                                   | 94.3     | 99.6                                                                       | 95.0     |
| N2–Fe–N6 | 88.9                                                              | 88.4                  | 88.3                                                                                                   | 89.0     | 88.6                                                                       | 88.1     |
| N3–Fe–N4 | 105.7                                                             | 99.9                  | 105.9                                                                                                  | 100.3    | 105.8                                                                      | 100.0    |
| N3–Fe–N5 | 88.9                                                              | 88.4                  | 88.3                                                                                                   | 89.0     | 88.6                                                                       | 88.1     |
| N3–Fe–N6 | 99.1                                                              | 94.7                  | 99.9                                                                                                   | 94.3     | 99.6                                                                       | 95.0     |
| N4–Fe–N5 | 75.0                                                              | 81.0                  | 74.9                                                                                                   | 81.0     | 74.7                                                                       | 80.9     |
| N4–Fe–N6 | 75.0                                                              | 81.0                  | 74.9                                                                                                   | 81.0     | 74.7                                                                       | 80.9     |
| N5–Fe–N6 | 150.0                                                             | 162.0                 | 149.9                                                                                                  | 161.9    | 149.4                                                                      | 161.9    |
| <i>a</i> | 74.7                                                              | 80.6                  | 74.5                                                                                                   | 80.4     | 74.5                                                                       | 80.5     |
| <i>φ</i> | 180.0                                                             | 180.0                 | 180.0                                                                                                  | 180.0    | 180.0                                                                      | 180.0    |
| <i>θ</i> | 83.4                                                              | 85.4                  | 82.7                                                                                                   | 84.8     | 82.9                                                                       | 84.4     |

<sup>a</sup>Experimental values are from molecule A in the crystal structure of this complex. <sup>b</sup>Experimental bonds and angles involving N5 and N6 have been swapped for this compound, because the crystallographic and computed structures having opposite handedness.

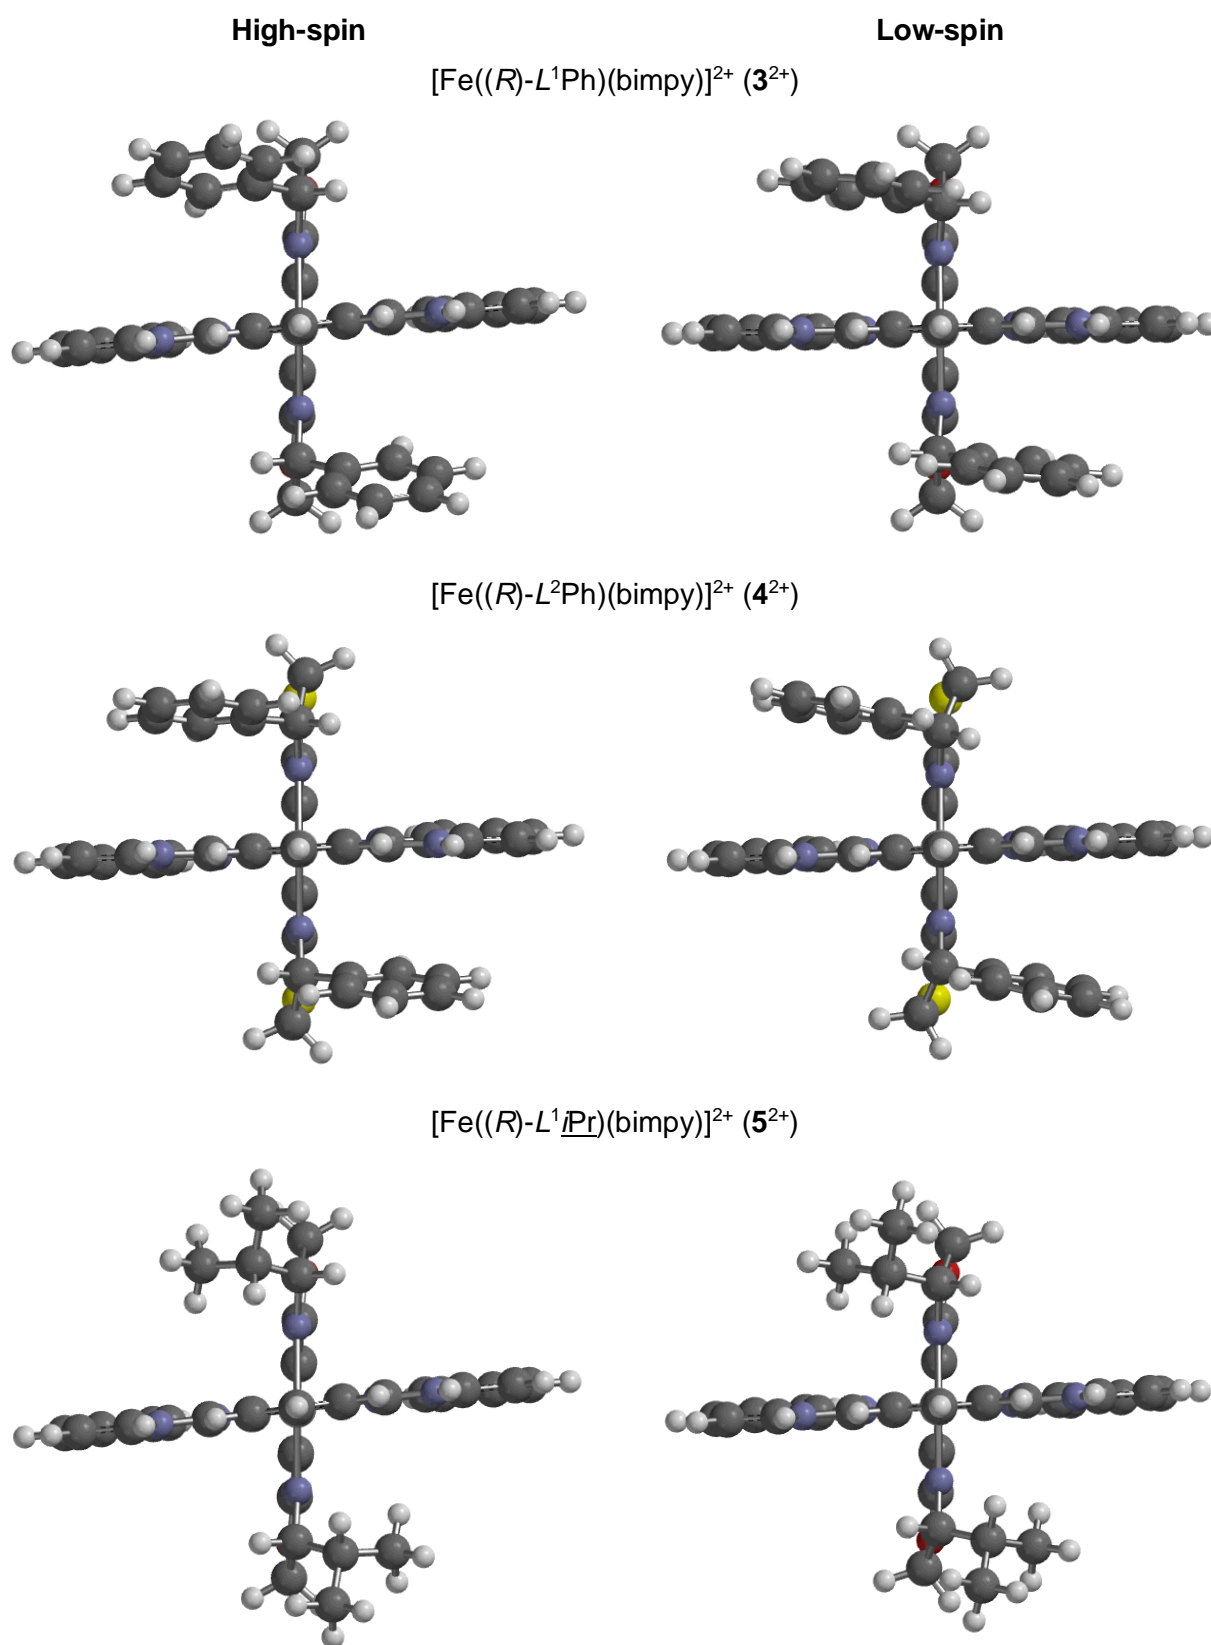

**Figure S36** Alternative views of the DFT energy-minimised structures of the heteroleptic  $[\text{Fe}(\text{LR})\text{L}]^{2+}$  ( $\text{L} = \text{bimpy}, \text{bpp}$  or  $\text{terpy}$ ) complexes, emphasising the conformations and orientations of the heterocyclic ligands. Other details as for Figure S33.

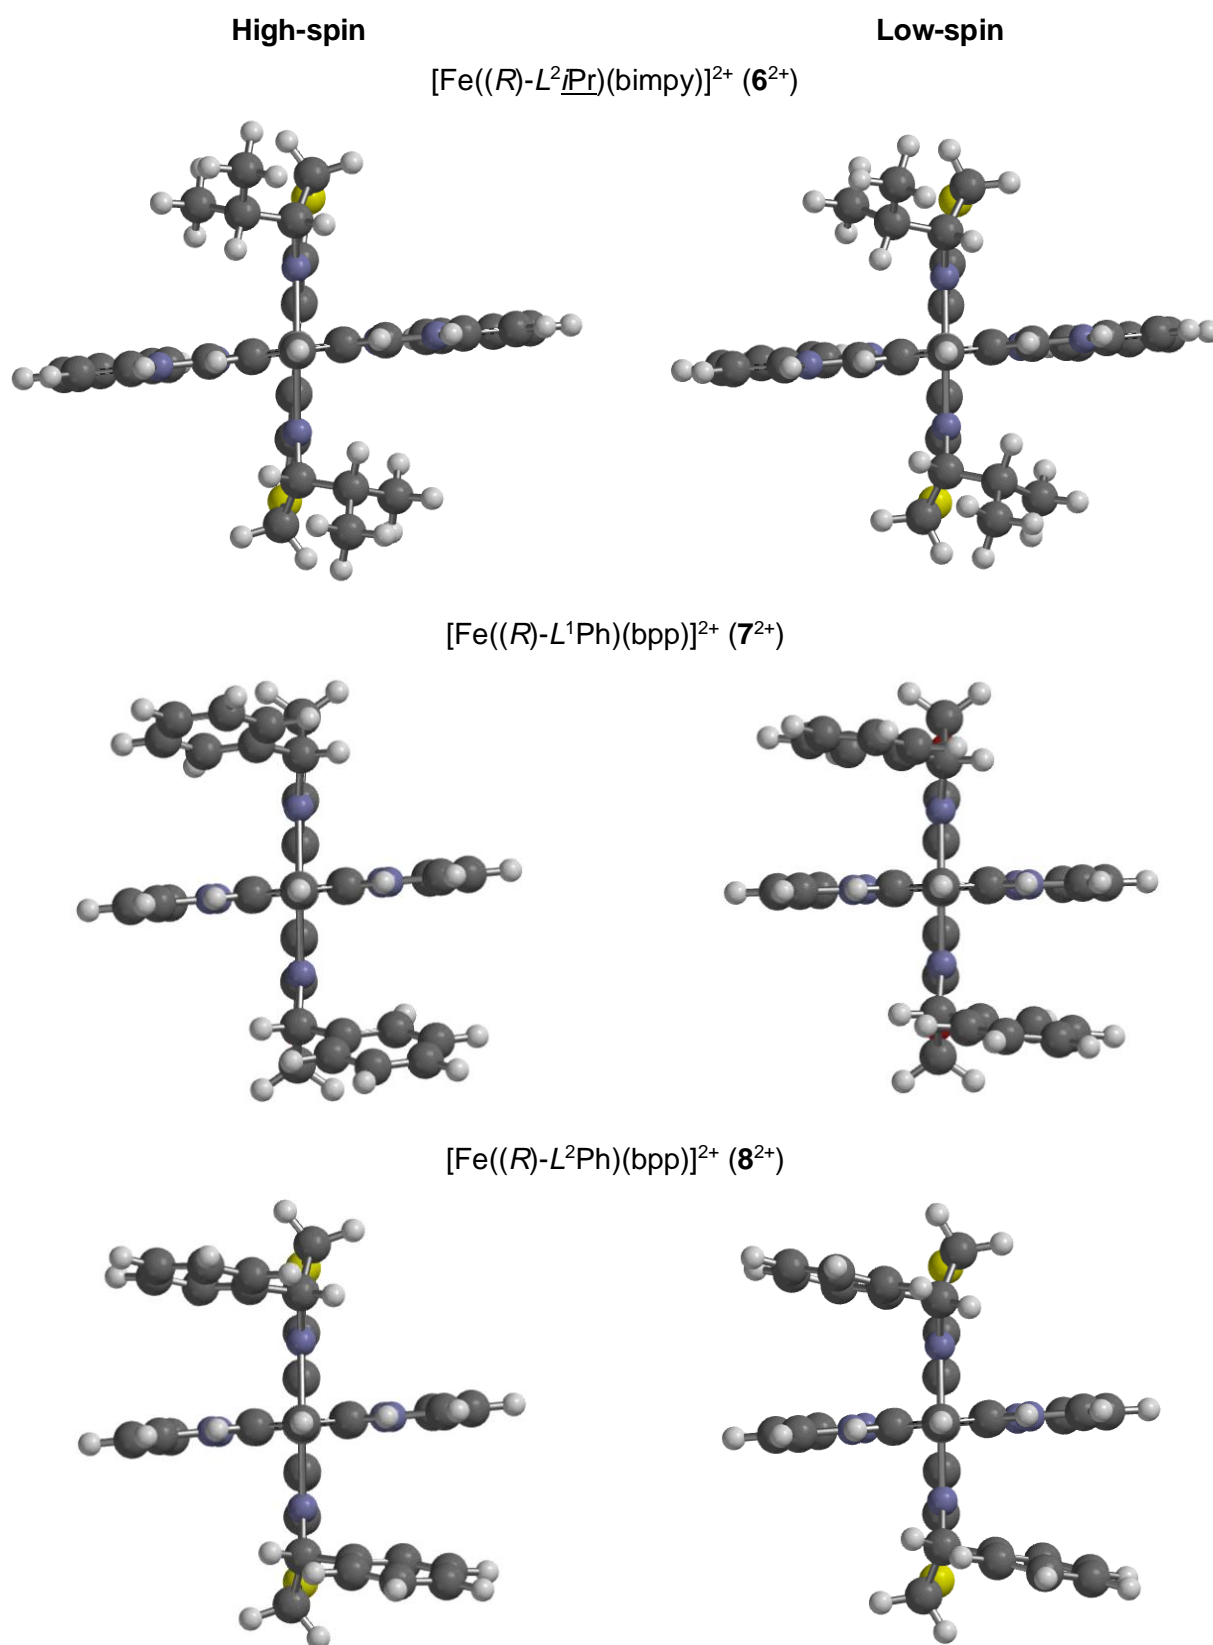

Figure S36 continued.

High-spin

Low-spin

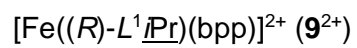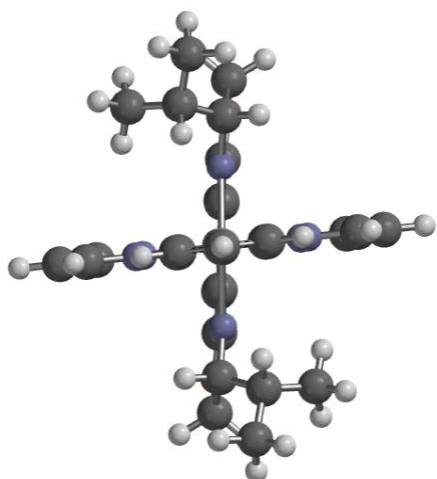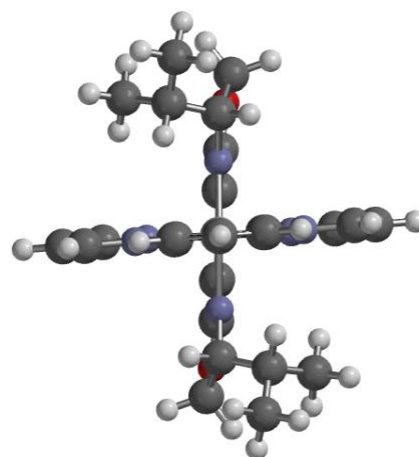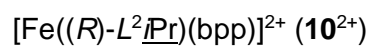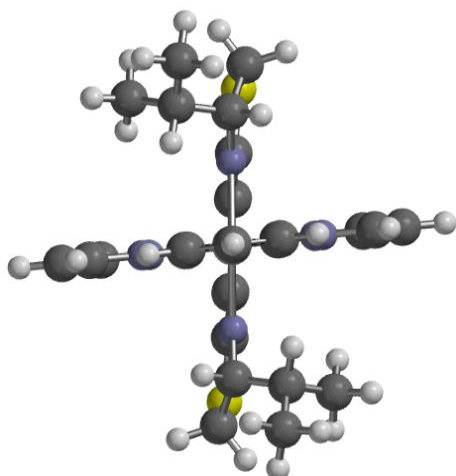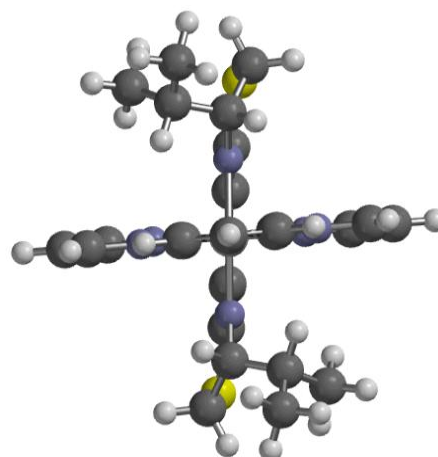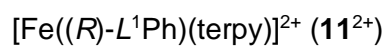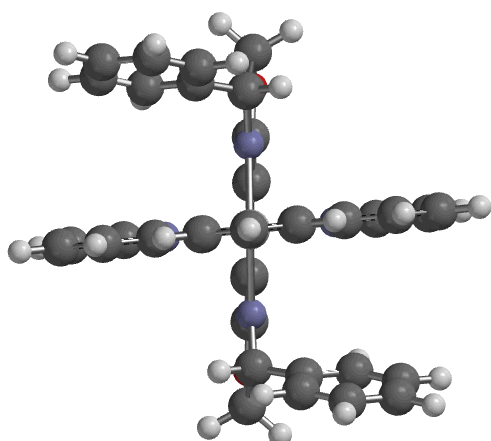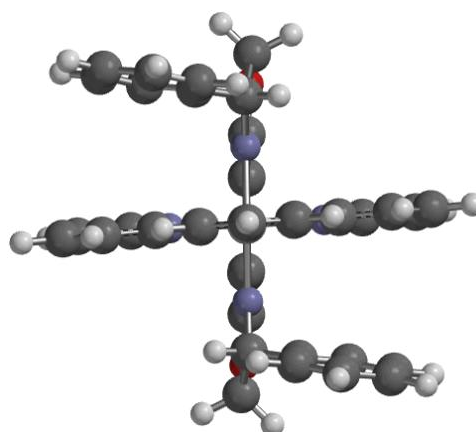

Figure S36 continued.

High-spin

Low-spin

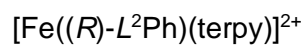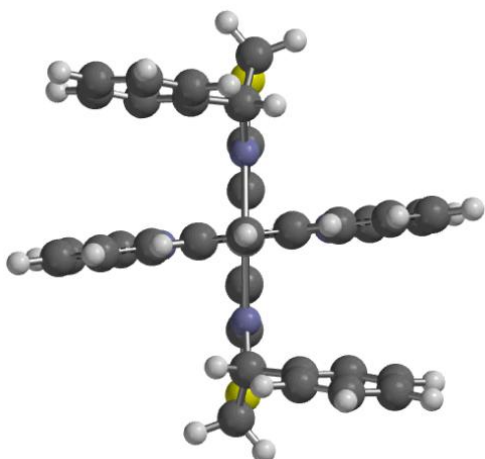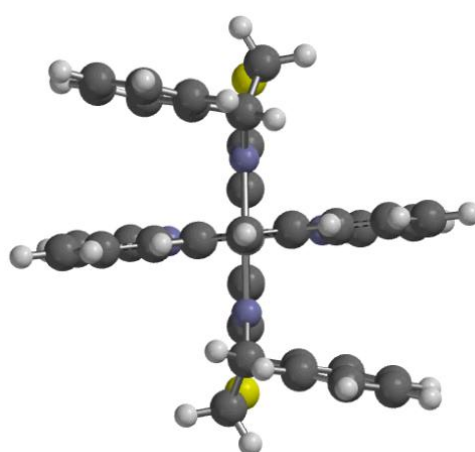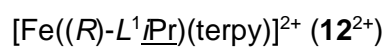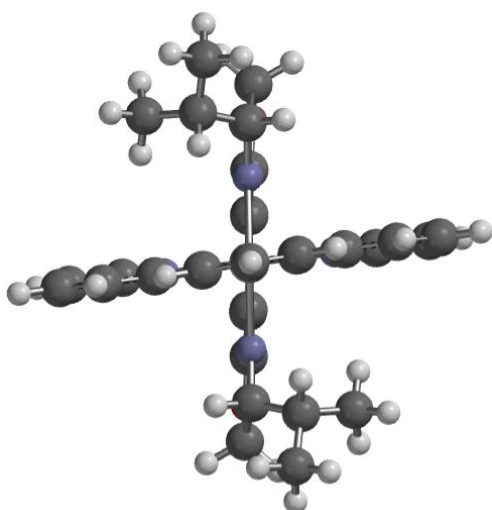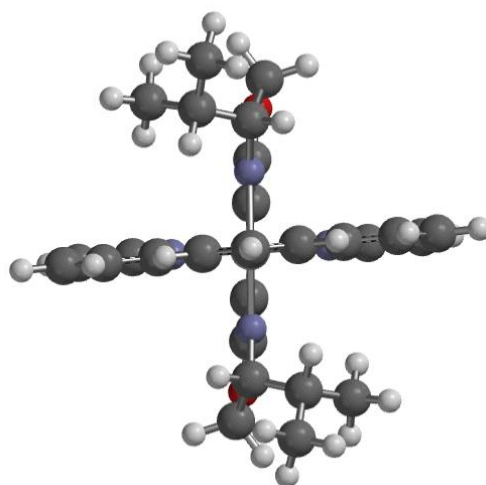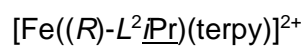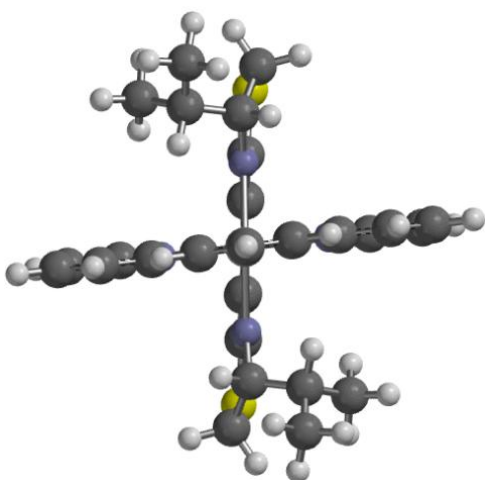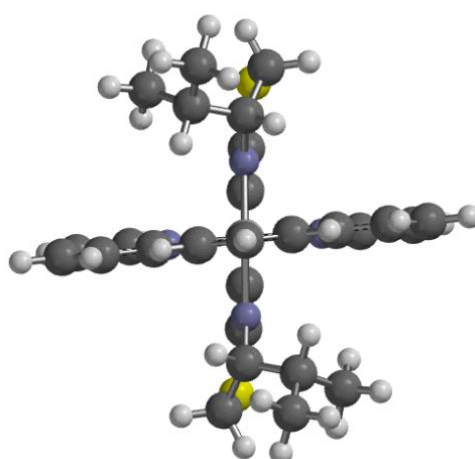

Figure S36 continued.

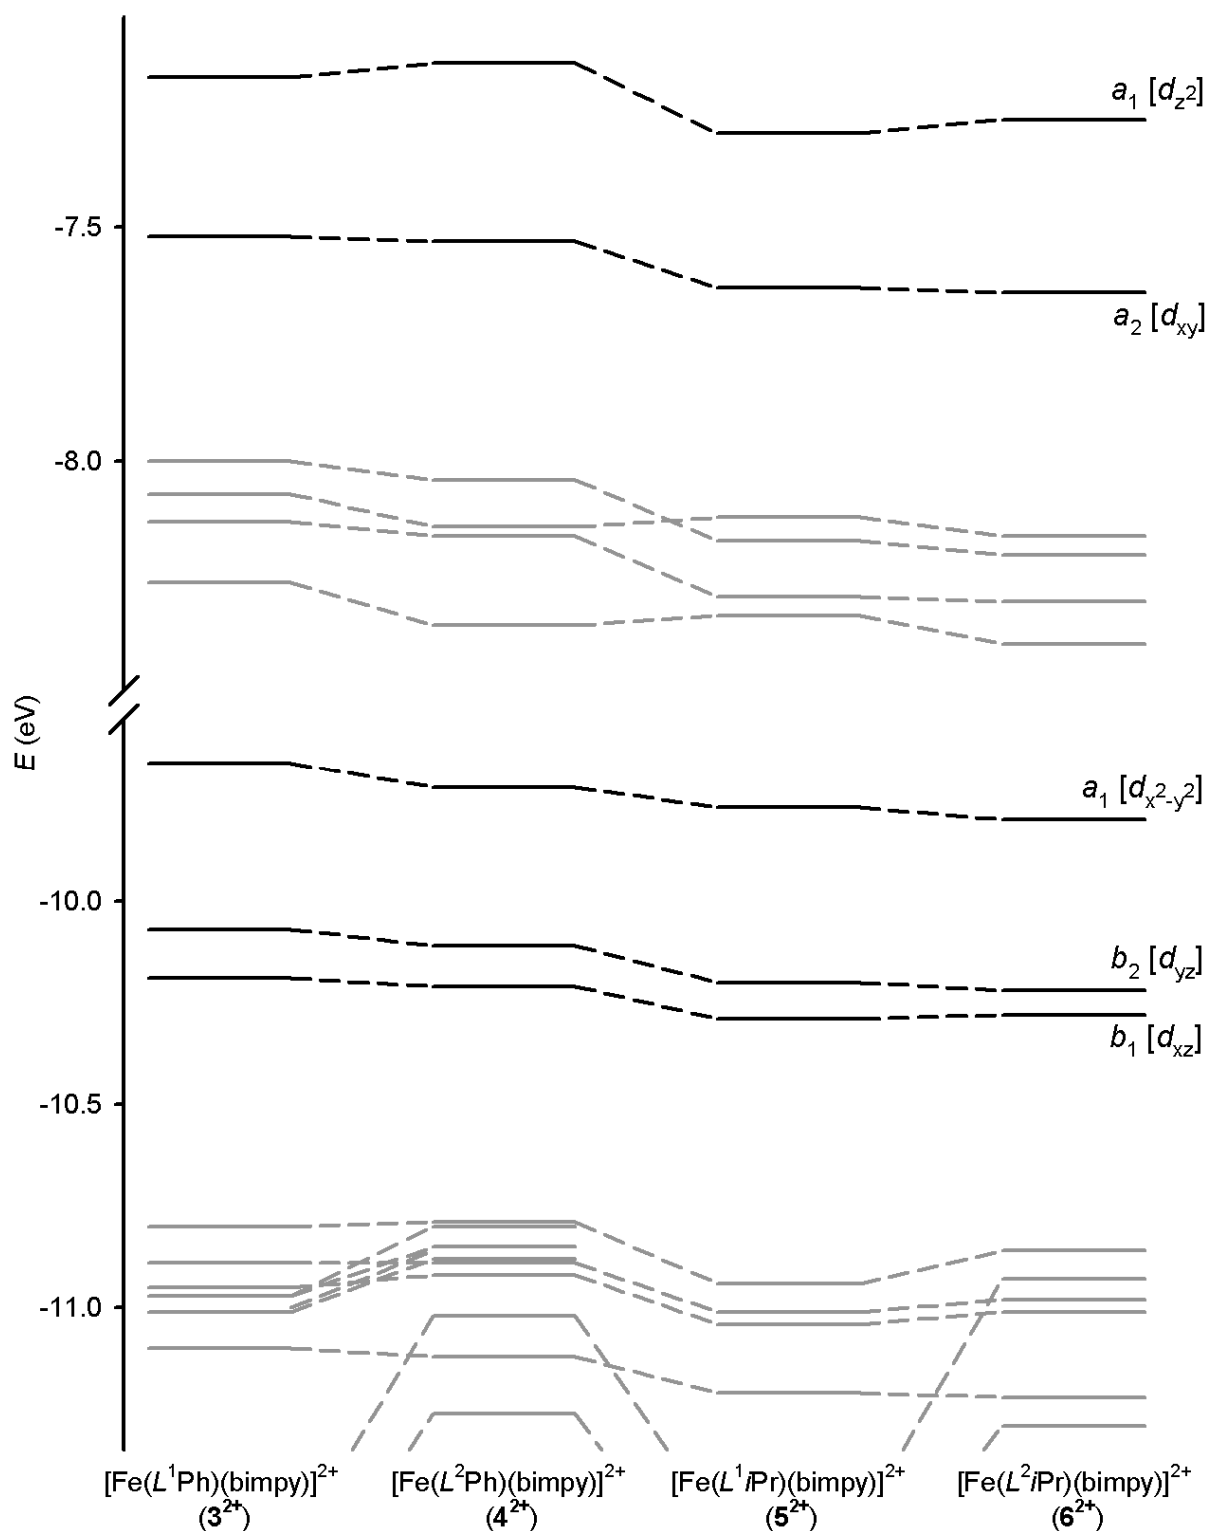

**Figure S37** Computed frontier molecular orbital energies of the low-spin  $[\text{Fe}(\text{LR})(\text{bimpy})]^{2+}$  derivatives. The metal-based  $d$ -orbitals are shown in black, while ligand-centred orbitals are de-emphasised in grey. The  $d$ -orbitals are given  $C_{2v}$  symmetry labels, which is the point group of an idealised  $[\text{Fe}(\text{LR})(\text{bimpy})]^{2+}$  molecule if the 'R' substituents are discounted.

$d_{zz}$  reports on out-of-plane  $\pi$ -bonding to the  $L^R$  pyridyl ring.

$d_{yz}$  reports on out-of-plane  $\pi$ -bonding to the bimpy pyridyl ring.

$d_{y_2-y_2}$  reports on out-of-plane  $\pi$ -bonding to the distal  $L^R$  and bimpy azolyl donors.

The four MOs near  $-11$  eV for  $[\text{Fe}(\text{LPh})(\text{bimpy})]^{2+}$  which do not have counterparts in  $[\text{Fe}(\text{LiPr})(\text{bimpy})]^{2+}$  are two near-degenerate pairs of  $\pi$ -orbitals on the  $\text{LPh}$  phenyl substituents.

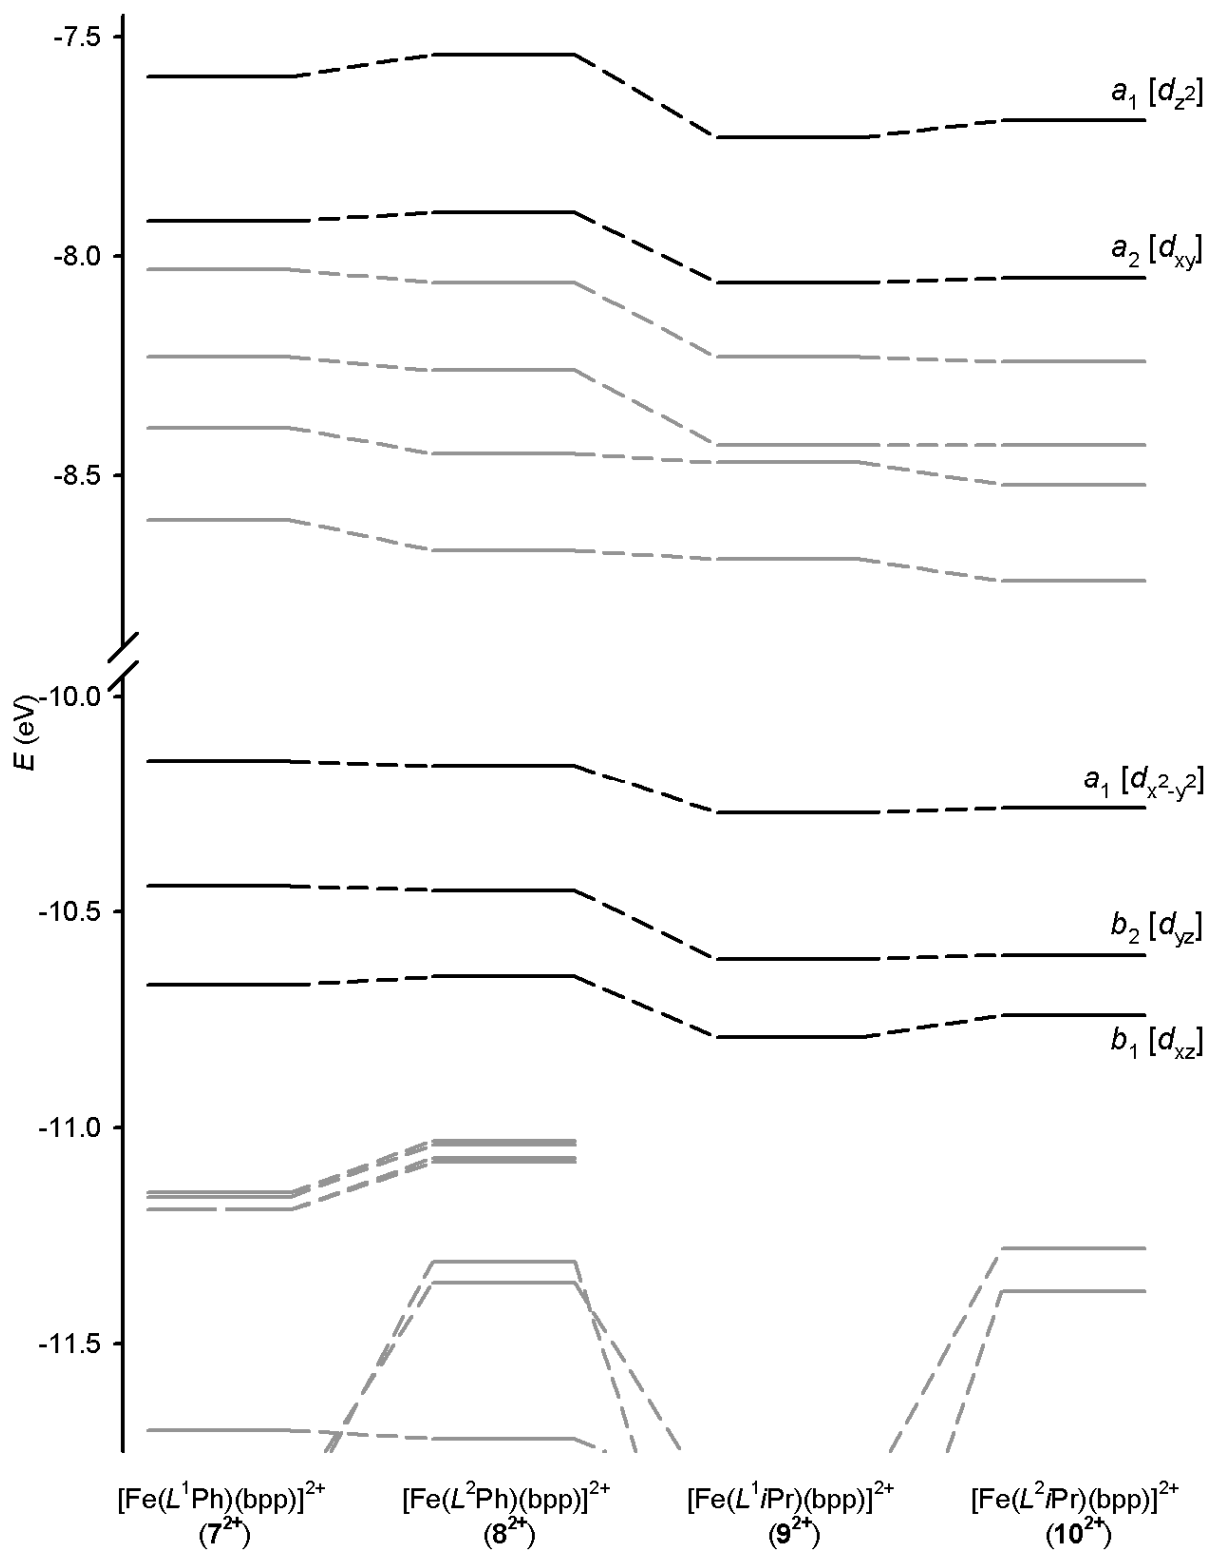

**Figure S38** Computed frontier molecular orbital energies of the low-spin  $[\text{Fe}(\text{LR})(\text{bpp})]^{2+}$  derivatives. The energy levels are plotted to the same vertical expansion as Figures S37 and S39, to facilitate comparison. Other details as for Figure S37.

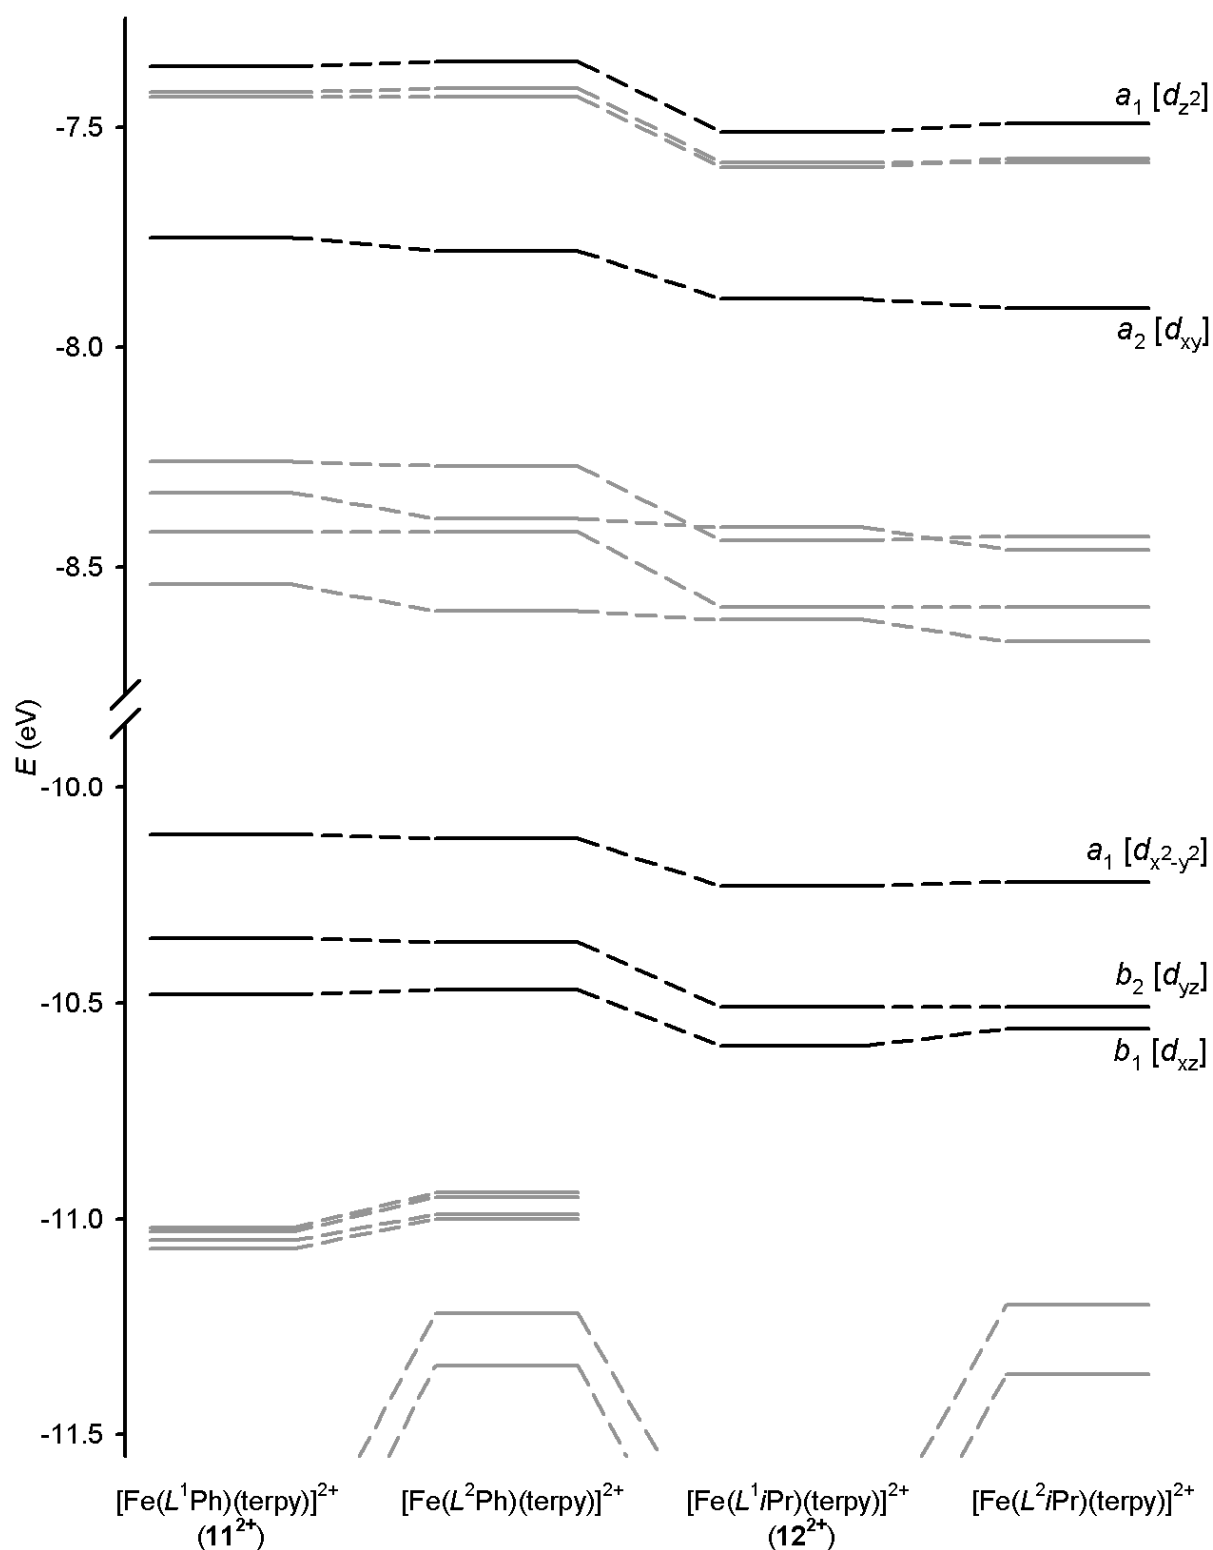

**Figure S39** Computed frontier molecular orbital energies of the low-spin  $[\text{Fe}(\text{LR})(\text{terpy})]^{2+}$  derivatives. The energy levels are plotted to the same vertical expansion as Figures S37 and S38, to facilitate comparison. Other details as for Figure S37.



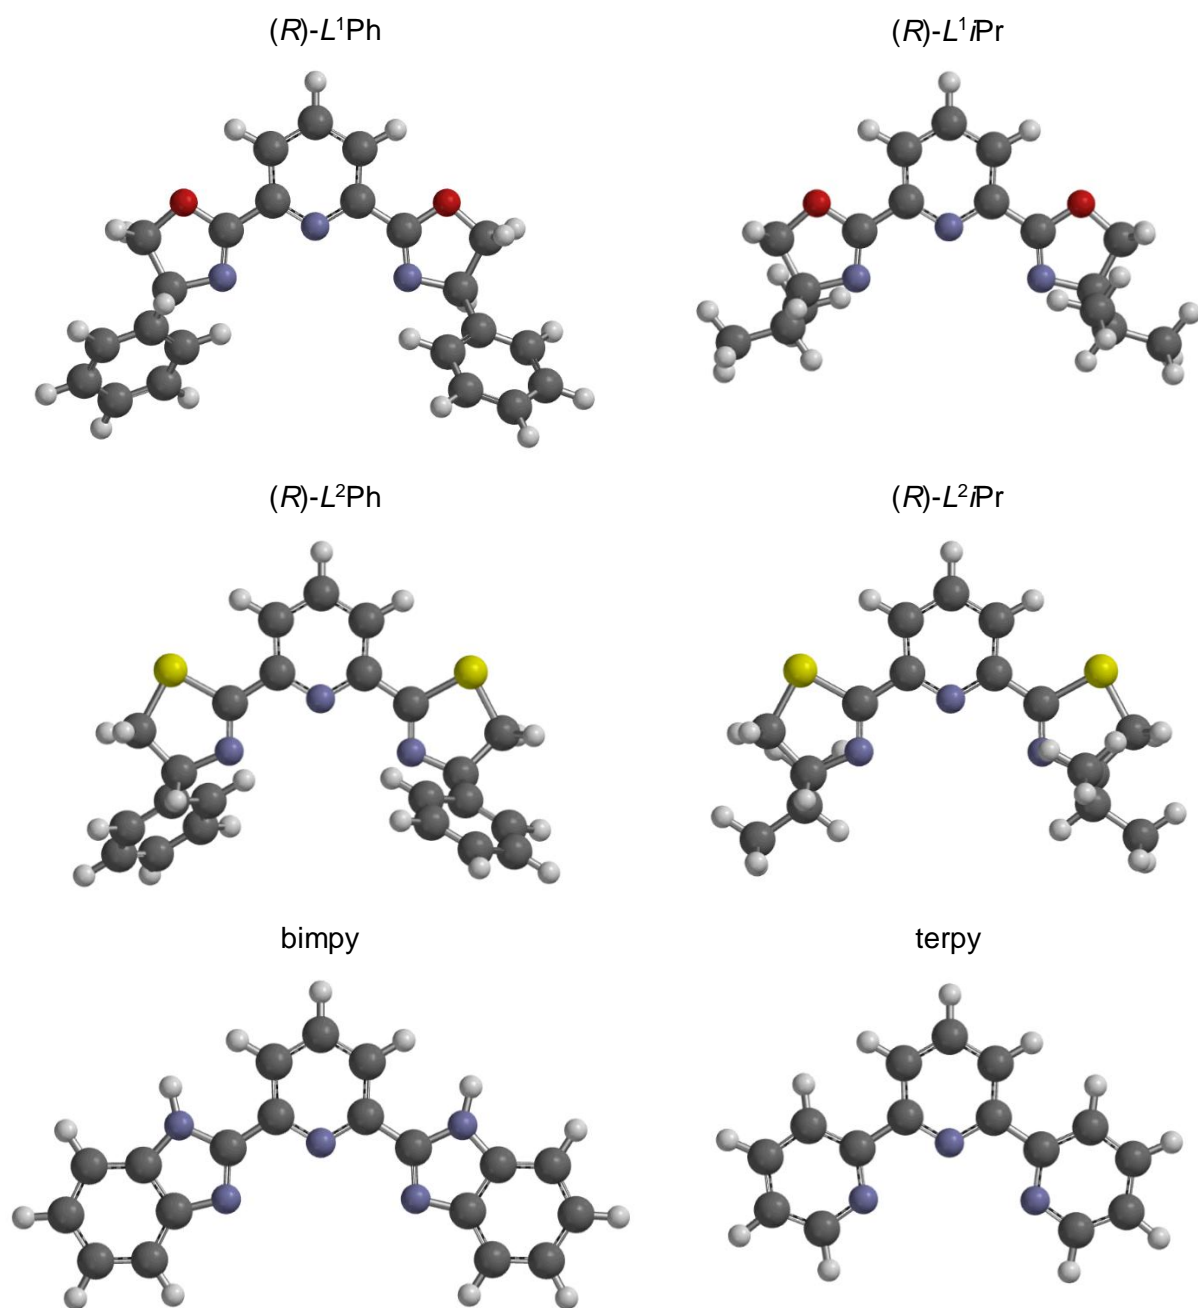

**Figure S40** Computed molecular structures for the organic ligands, minimised in the *cisoid* conformation appropriate for metal binding. Colour code: C, dark grey; H, white; N, blue; O, red; S, yellow.

Minimisations of the other ligands in Table S10 by the same protocol are reported in refs. 2 ( $L^1$ H and  $L^2$ H) and 13 (bpp).

**Table S10 Computed energies of the minimised organic ligands, and the energies of their N-donor lone pair combination MOs (Figure S41). The ligands are listed in order of decreasing average energy,  $E_{av}\{\text{lone pair}\}$ .**

|                               | $E / \text{Ha}$ | $E\{\text{lone pair 1}\} / \text{eV}$ | $E\{\text{lone pair 2}\} / \text{eV}$ | $E\{\text{lone pair 3}\} / \text{eV}$ | $E_{av}\{\text{lone pair}\} / \text{eV}$ |
|-------------------------------|-----------------|---------------------------------------|---------------------------------------|---------------------------------------|------------------------------------------|
| terpy                         | -742.197061     | -5.11                                 | -5.38                                 | -5.69                                 | -5.40                                    |
| ( <i>R</i> )- $L^2\text{iPr}$ | -1621.822396    | -5.70                                 | -5.89                                 | -6.04                                 | -5.88                                    |
| $L^2\text{H}^a$               | -1386.035366    | -5.74                                 | -5.96                                 | -6.08                                 | -5.93                                    |
| bimpy                         | -1005.289103    | -5.68                                 | -5.98                                 | -6.14                                 | -5.93                                    |
| ( <i>R</i> )- $L^1\text{iPr}$ | -975.957011     | -5.69                                 | -6.05                                 | -6.16                                 | -5.97                                    |
| $L^1\text{H}^a$               | -740.165969     | -5.71                                 | -6.09                                 | -6.18                                 | -5.99                                    |
| ( <i>R</i> )- $L^2\text{Ph}$  | -1847.979456    | -5.83                                 | -6.01                                 | -6.20                                 | -6.01                                    |
| ( <i>R</i> )- $L^1\text{Ph}$  | -1202.115052    | -5.88                                 | -6.27                                 | -6.36                                 | -6.17                                    |
| bpp <sup>b</sup>              | -698.043540     | -5.94                                 | -6.42                                 | -6.82                                 | -6.39                                    |

<sup>a</sup>Data from ref 2. <sup>b</sup>Data from ref 13.

### Discussion of these data, and the other frontier orbitals in the molecules (Figure S41, next page)

The average  $E_{av}\{\text{lone pair}\}$  energy should correlate with the Brønsted basicity of the ligands, with a more positive  $E_{av}$  value corresponding to a more strongly  $\sigma$ -donating ligand. In that respect:

- terpy is much more basic than the other ligands in the Table;
- the basicity of bimpy resembles  $L^1\text{R}$  and  $L^2\text{R}$ ;
- bpp is the least basic ligand.

Each individual  $L^2\text{R}$  ligand is more basic than its  $L^1\text{R}$  analogue, by 0.06-0.16 eV, which is consistent with previous work.<sup>2</sup> The *LH* and *LiPr* ligands within each of those series have similar basicities, but the *LPh* derivative is less basic.

It is impossible to deconvolute the individual basicities of the different heterocyclic N-donors in more detail from these data, because there is extensive mixing of the N lone pair MOs.

The energies of the  $\pi$ -HOMO and  $\pi^*$ -LUMO orbitals for  $L^2\text{H}$ , bimpy and  $L^1\text{H}$  mostly mirror each other, with higher energy azolyl  $\pi$ -donor HOMOs being associated with lower energy pyridyl  $\pi$ -acceptor LUMOs, and *vice versa* (Figure S41). That is, the ligands which are better  $\pi$ -donors from their azolyl rings, are also better  $\pi$ -acceptors into their pyridyl rings.

Hence, overall those ligands should have similar  $\pi$ -acidities with respect to metal–ligand bonding. That agrees with our previous computational study of  $[\text{Fe}(L^1\text{R})_2]^{2+}$  and  $[\text{Fe}(L^2\text{R})_2]^{2+}$  complexes.<sup>2</sup>

The pyridyl  $\pi$ -HOMO and  $\pi^*$ -LUMOs in bpp are all higher energy, implying its pyridyl ring is less  $\pi$ -acidic than the above ligands (Figure S41). Moreover the pyrazolyl  $\pi$ -donor MOs in bpp are lowered in energy by a larger amount, compared to the analogous orbitals in the other azolyl ligands. We conclude bpp should be a worse  $\pi$ -donor and a worse  $\pi$ -acceptor than the other ligands; that is, bpp has a reduced overall metal–ligand  $\pi$ -bonding capability.

Since the  $\pi^*$ -LUMO energies for terpy are similar to the other ligands but the corresponding  $\pi$ -donor MOs are much lower energy, terpy is the best  $\pi$ -acceptor ligand in the Table (Figure S41).

Since it contains the strongest  $\sigma$ -donor *and* the best  $\pi$ -acceptor co-ligand,  $[\text{Fe}(\text{LR})(\text{terpy})]^{2+}$  should be the most strongly low-spin of the complexes in this study, as observed computationally and in preliminary experimental data (Figures S28-S32).

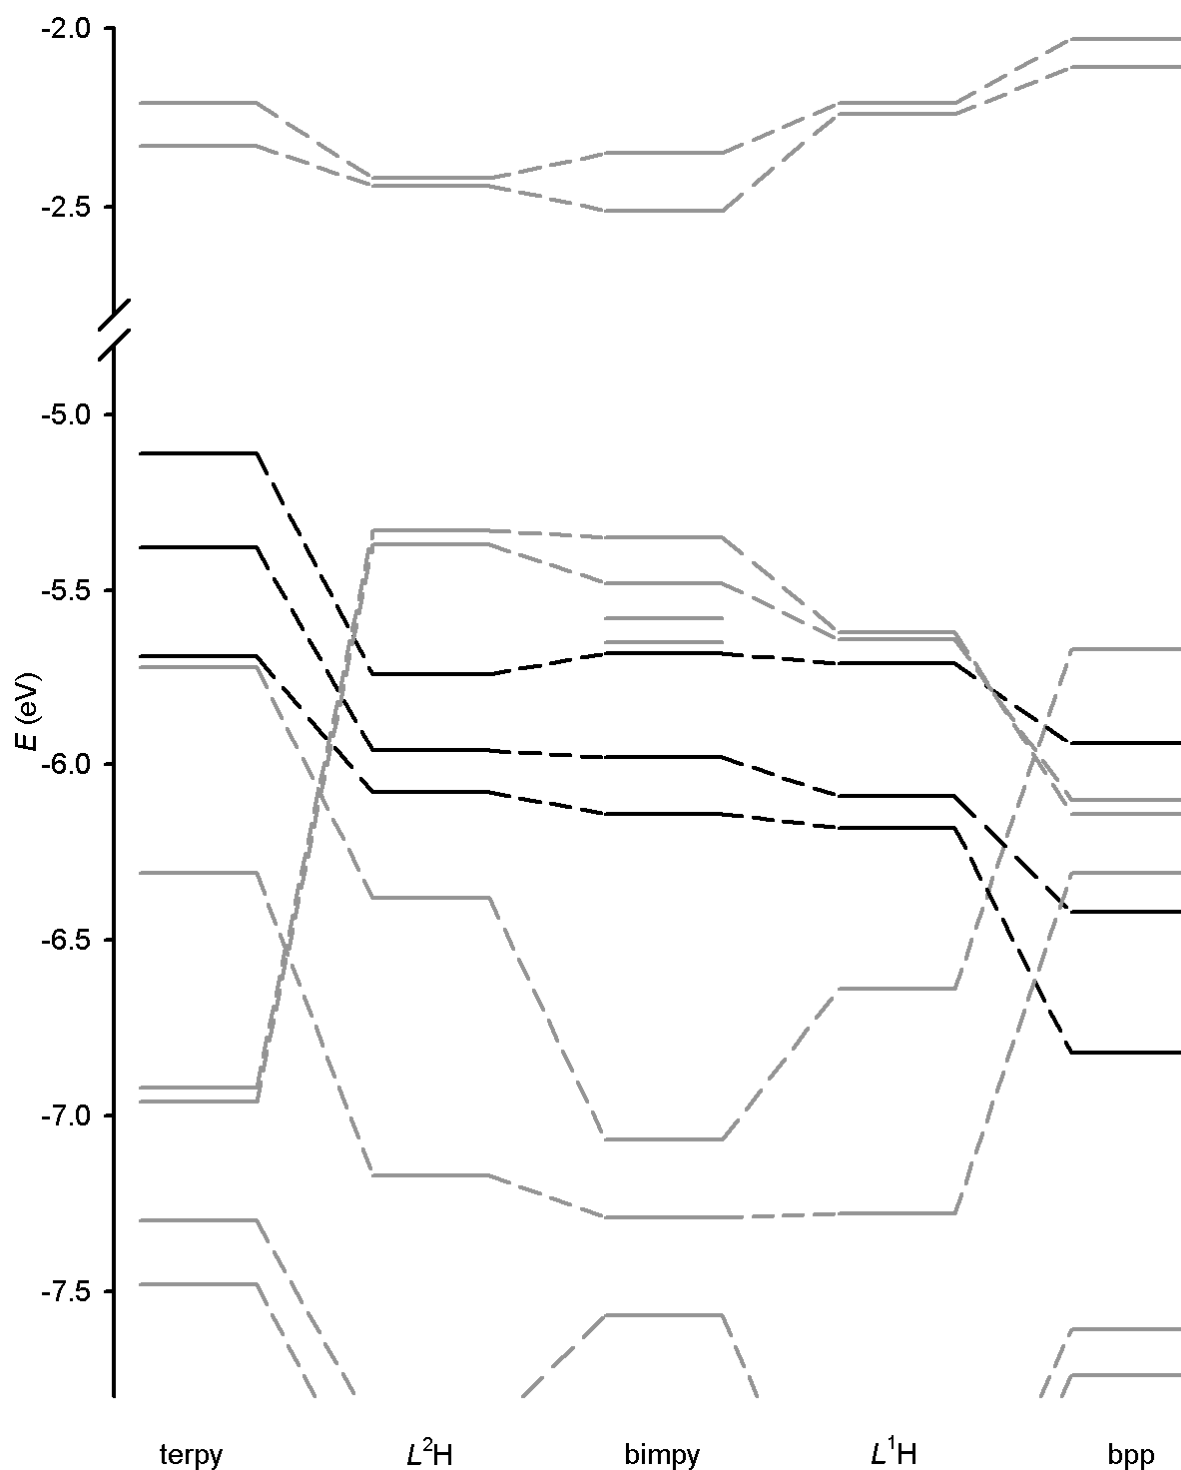

**Figure S41** Frontier molecular orbital energies of metal-free ligands from this study. The metal-donor N lone pair MOs are in black, while ligand-centred orbitals are in grey. These data are interpreted on page S65.

The N lone pair MO energies show decreasing Brønsted basicity from left to right in the Figure (Table S10).

The HOMO and HOMO-1 of  $L^2H$ , bipy and  $L^1H$  are azole-centred  $\pi$  orbitals, which should contribute to ligand $\rightarrow$ metal  $\pi$ -bonding. These orbitals are the HOMO-2 and HOMO-3 for bpp.

The HOMO for bpp is a pyridyl-centred  $\pi$ -orbital, which is much higher energy in bpp. That implies the pyridyl ring in bpp should be a better  $\pi$ -donor/worse  $\pi$ -acceptor than in the other ligands.

The HOMO-2 and HOMO-3 for bipy are  $\pi$  orbital combinations centred on the benzimidazolyl benzo groups, which have no counterparts in the other ligands in the Figure.

The LUMO and LUMO+1 are  $\pi^*$ -orbitals, which are mostly centered on the central pyridyl ring.

**Table S11** Computed energies of the homoleptic complexes, used to calculate  $\Delta E\{\text{het}\}$  for the heterochiral molecules (Table 2, main article and Table S12). Their experimental solution-phase SCO mid-point temperatures ( $T_{1/2}$ ) are also included (HS = high-spin, LS = low-spin).

|                                                                          | $T_{1/2}$ , K       | $E(\text{HS})$ , Ha | $E(\text{LS})$ , Ha | $\Delta E_{\text{rel}}\{\text{HS-LS}\}$ ,<br>kcal mol <sup>-1</sup> <sup>a</sup> | Ref       |
|--------------------------------------------------------------------------|---------------------|---------------------|---------------------|----------------------------------------------------------------------------------|-----------|
| [Fe( <i>R</i> )- <i>L</i> <sup>1</sup> Ph) <sub>2</sub> ] <sup>2+</sup>  | 244                 | -3667.635387        | -3667.660670        | -0.1                                                                             | 2         |
| [Fe( <i>R</i> )- <i>L</i> <sup>2</sup> Ph) <sub>2</sub> ] <sup>2+</sup>  | 344                 | -4959.373908        | -4959.400465        | +0.7                                                                             | 2         |
| [Fe( <i>R</i> )- <i>L</i> <sup>1</sup> iPr) <sub>2</sub> ] <sup>2+</sup> | HS                  | -3215.310328        | -3215.320134        | -9.8                                                                             | 2         |
| [Fe( <i>R</i> )- <i>L</i> <sup>2</sup> iPr) <sub>2</sub> ] <sup>2+</sup> | 277                 | -4507.045026        | -4507.068592        | -1.2                                                                             | 2         |
| [Fe( <i>L</i> <sup>1</sup> H) <sub>2</sub> ] <sup>2+</sup>               | 245                 | -2743.727948        | -2743.753346        | 0                                                                                | 2         |
| [Fe( <i>L</i> <sup>2</sup> H) <sub>2</sub> ] <sup>2+</sup>               | LS                  | -4035.468705        | -4035.503406        | +5.8                                                                             | 2         |
| [Fe(bimpy) <sub>2</sub> ] <sup>2+</sup>                                  | 320±15 <sup>b</sup> | -3274.011366        | -3274.038130        | +0.9                                                                             | this work |
| [Fe(bpp) <sub>2</sub> ] <sup>2+</sup>                                    | 248 <sup>c</sup>    | -2659.474752        | -2659.500527        | +0.2 <sup>d</sup>                                                                | 13        |
| [Fe(terpy) <sub>2</sub> ] <sup>2+</sup>                                  | LS                  | -2747.823887        | -2747.866679        | +10.9                                                                            | this work |

<sup>a</sup>A positive  $\Delta E_{\text{rel}}\{\text{HS-LS}\}$  means the low-spin state is more stable than for [Fe(*L*<sup>1</sup>H)<sub>2</sub>]<sup>2+</sup>, and *vice versa*.

<sup>b</sup>Ref. 23.  $T_{1/2}$  for [Fe(bimpy)<sub>2</sub>]<sup>2+</sup> is solvent-dependent, which may reflect the influence of hydrogen bonding of the solvent to the bimpy N-H groups. <sup>c</sup>Ref. 6. <sup>d</sup>The  $\Delta E_{\text{rel}}\{\text{HS-LS}\}$  value for [Fe(bpp)<sub>2</sub>]<sup>2+</sup> in ref. 13 is rescaled relative to [Fe(*L*<sup>1</sup>H)<sub>2</sub>]<sup>2+</sup> in this Table, for consistency with the other compounds in this work.

Note the ligand nomenclature used in ref. 2 is different from this paper.

**Table S12** Computed energies of [Fe(*LH*)L]<sup>2+</sup> (L = bimpy, bpp or terpy), the unsubstituted analogues of the heteroleptic complexes synthesised in this work.

|                                                     | $E(\text{HS})$ , Ha | $E(\text{LS})$ , Ha | $\Delta E_{\text{rel}}\{\text{HS-LS}\}$ ,<br>kcal mol <sup>-1</sup> <sup>a</sup> | $\Delta E\{\text{het, HS}\}$ ,<br>kcal mol <sup>-1</sup> <sup>b</sup> | $\Delta E\{\text{het, LS}\}$ ,<br>kcal mol <sup>-1</sup> <sup>b</sup> |
|-----------------------------------------------------|---------------------|---------------------|----------------------------------------------------------------------------------|-----------------------------------------------------------------------|-----------------------------------------------------------------------|
| [Fe( <i>L</i> <sup>1</sup> H)(bimpy)] <sup>2+</sup> | -3008.871965        | -3008.897390        | 0.0                                                                              | +1.5                                                                  | +1.0                                                                  |
| [Fe( <i>L</i> <sup>2</sup> H)(bimpy)] <sup>2+</sup> | -3654.742485        | -3654.771662        | +2.4                                                                             | +1.5                                                                  | +0.6                                                                  |
| [Fe( <i>L</i> <sup>1</sup> H)(bpp)] <sup>2+</sup>   | -2701.602925        | -2701.627370        | -0.6                                                                             | +1.0                                                                  | +0.3                                                                  |
| [Fe( <i>L</i> <sup>2</sup> H)(bpp)] <sup>2+</sup>   | -3347.473716        | -3347.501527        | +1.5                                                                             | +1.3                                                                  | -0.3                                                                  |
| [Fe( <i>L</i> <sup>1</sup> H)(terpy)] <sup>2+</sup> | -2745.776841        | -2745.810779        | +5.4                                                                             | +0.6                                                                  | +0.5                                                                  |
| [Fe( <i>L</i> <sup>2</sup> H)(terpy)] <sup>2+</sup> | -3391.647743        | -3391.685274        | +7.6                                                                             | +0.9                                                                  | +0.2                                                                  |

<sup>a</sup>A positive  $\Delta E_{\text{rel}}\{\text{HS-LS}\}$  means the low-spin state is more stable than for [Fe(*L*<sup>1</sup>H)<sub>2</sub>]<sup>2+</sup>, and *vice versa*.

<sup>b</sup>A positive  $\Delta E\{\text{het}\}$  means heteroleptic [Fe(*LH*)L]<sup>2+</sup> is more stable than an equimolar mixture of homoleptic [Fe(*LH*)<sub>2</sub>]<sup>2+</sup> and [FeL<sub>2</sub>]<sup>2+</sup> by this protocol.

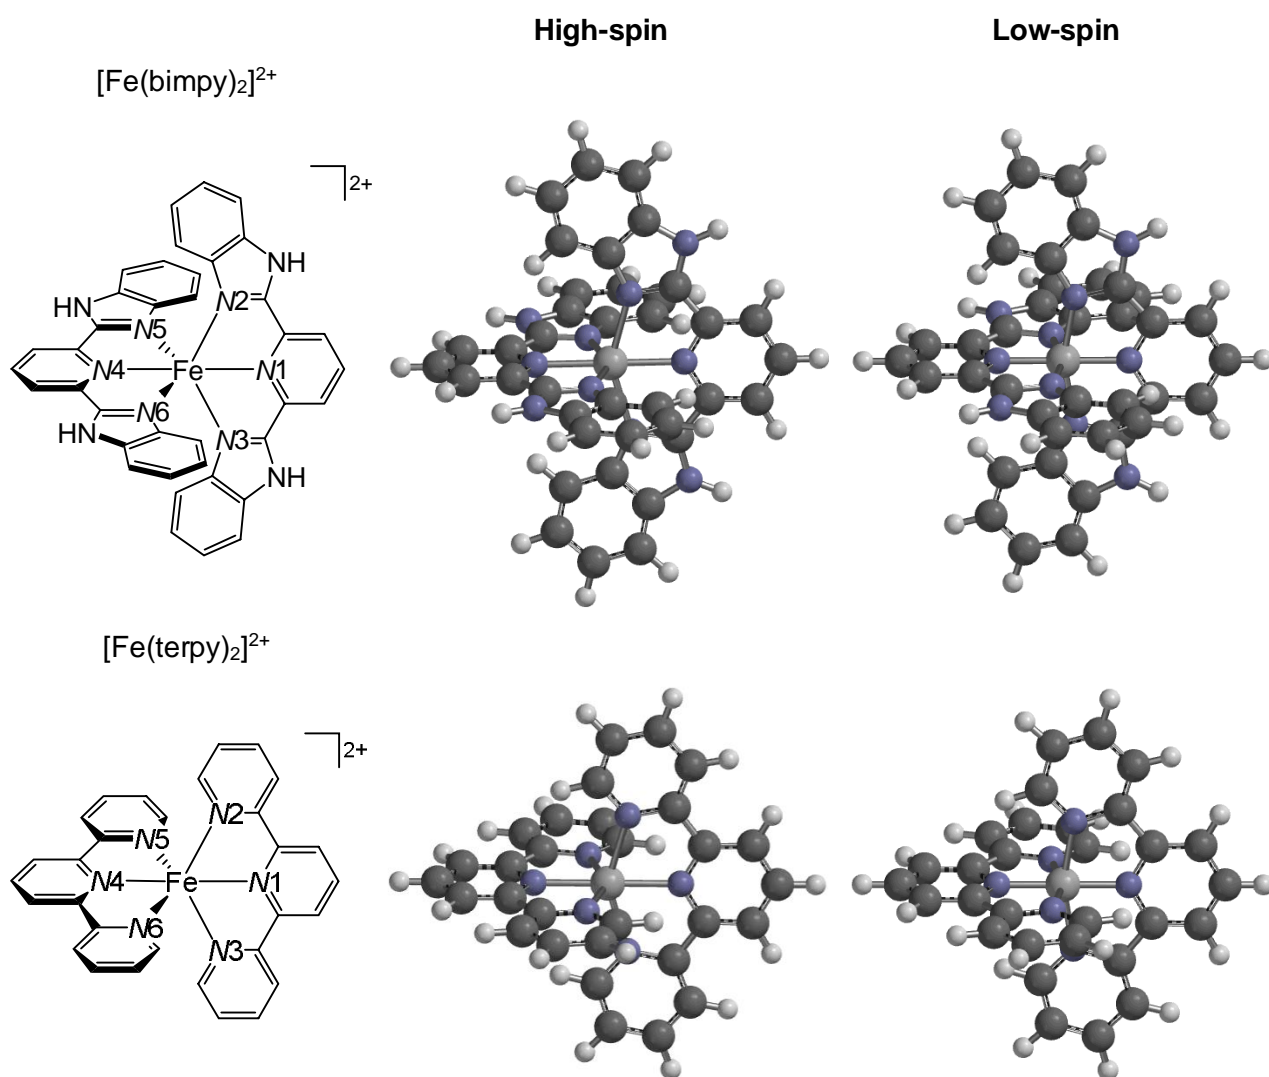

**Figure S42** DFT energy-minimised structures of  $[\text{Fe}(\text{bimpy})_2]^{2+}$  and  $[\text{Fe}(\text{terpy})_2]^{2+}$  (Table S11), which were produced in this study for the  $\Delta E\{\text{het}\}$  calculations (Table 2, main article). Other details as for Figure S33.

The minimised structures of the other molecules in Table S11 are reported in refs. 2 and 13.

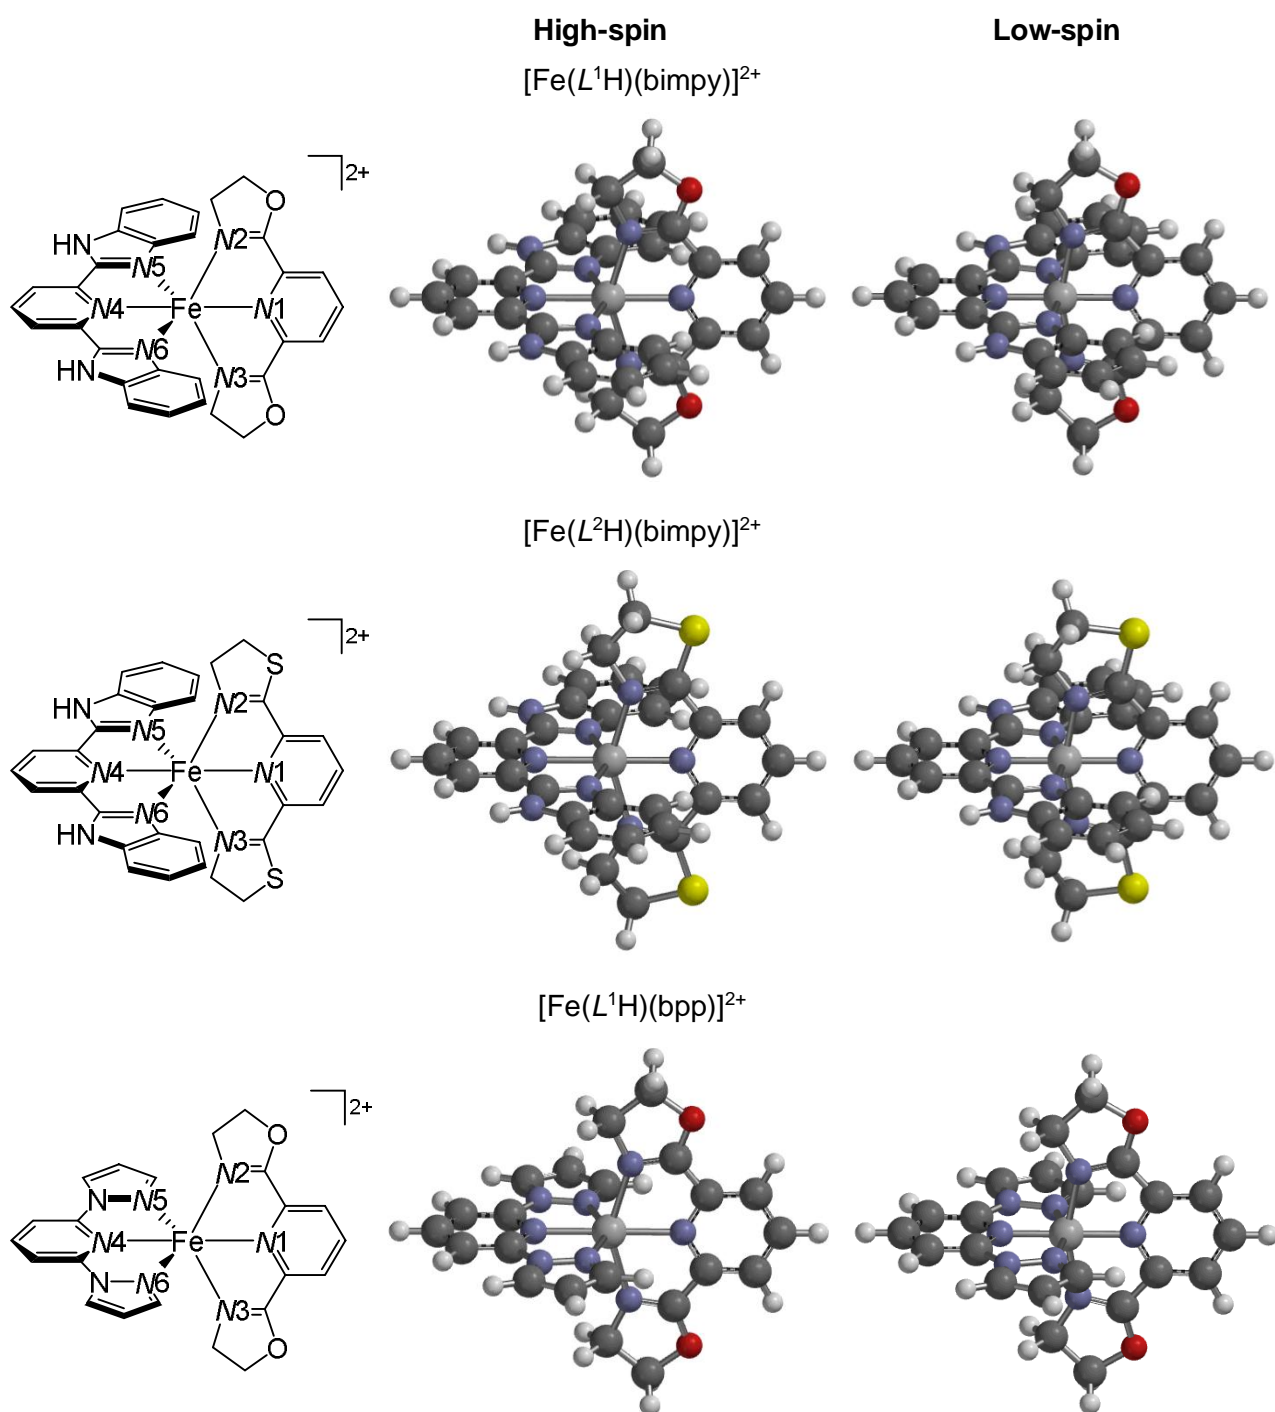

**Figure S43** DFT energy-minimised structures of  $[\text{Fe}(\text{LH})\text{L}]^{2+}$  (L = bimpy, bpp or terpy), the unsubstituted analogues of the heteroleptic complexes synthesised in this work (Table S12).

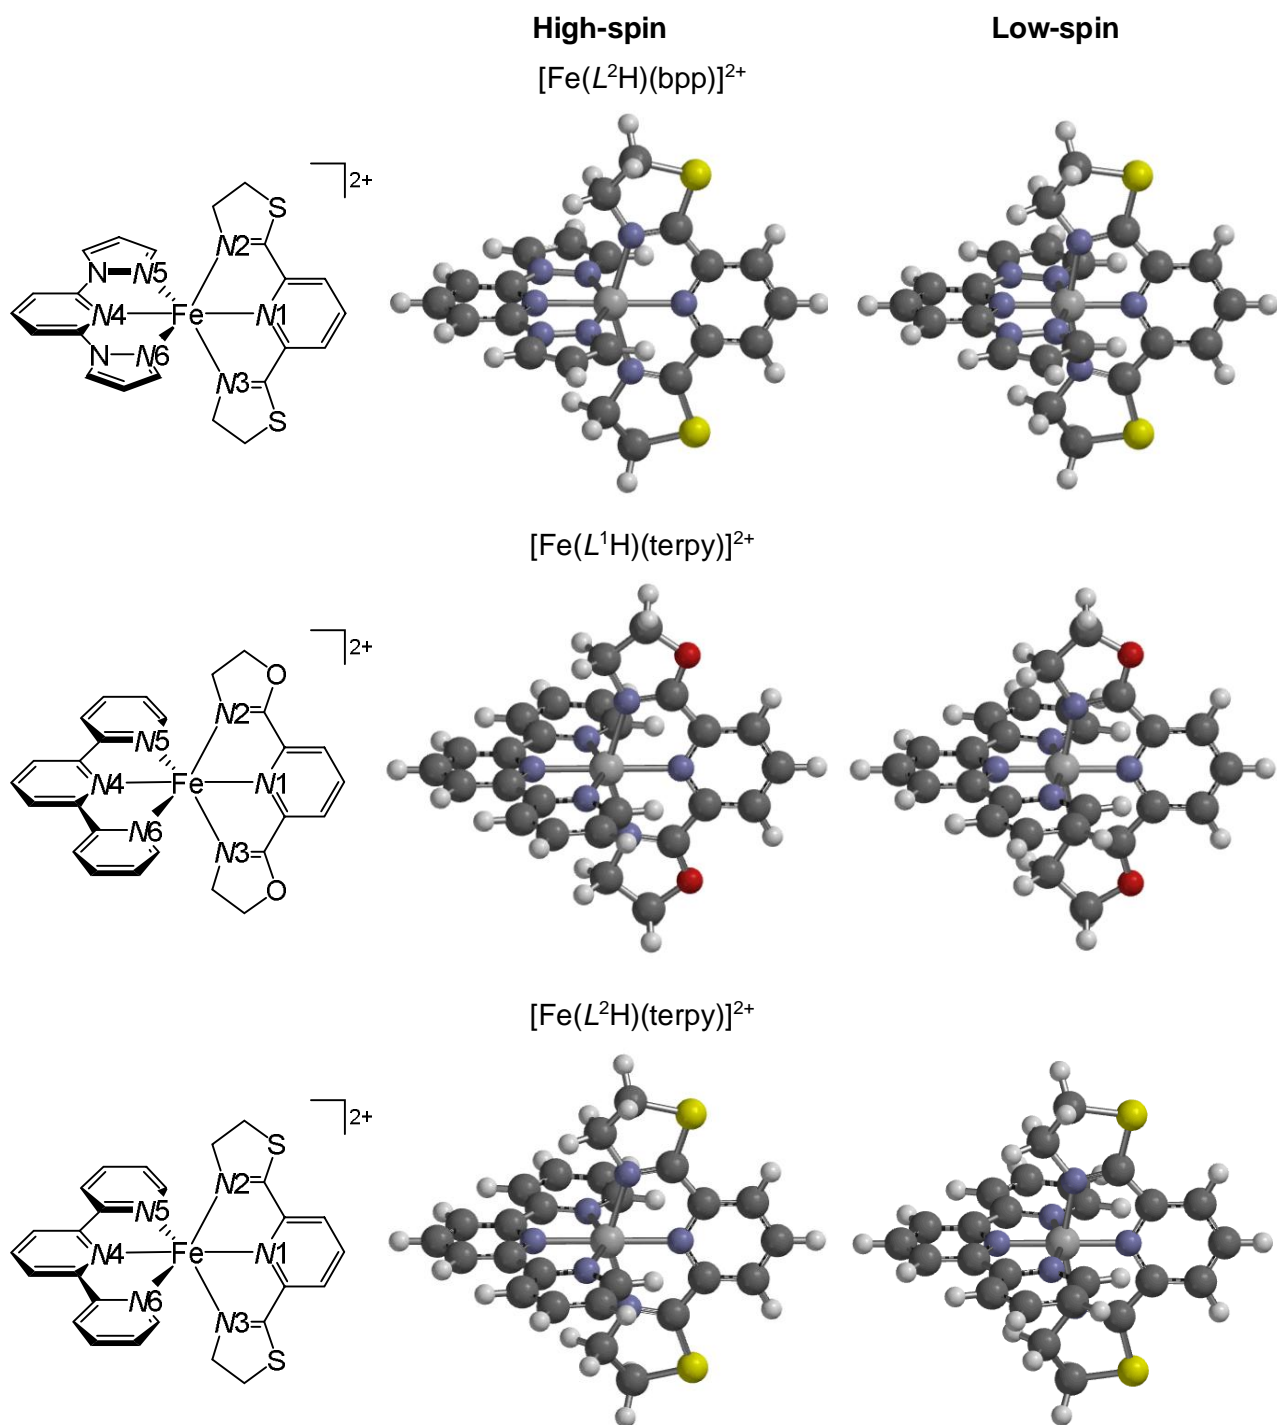

Figure S43 continued.

**Table S13** Atomic coordinates for the DFT-minimised molecules in this study.

| $[\text{Fe}((S)\text{-}L^1\text{Ph})((R)\text{-}L^2\text{Ph})]^{2+}$ ( $\mathbf{1}^{2+}$ ), high-spin |    |            |            |            |
|-------------------------------------------------------------------------------------------------------|----|------------|------------|------------|
| 1                                                                                                     | Fe | 0.0440141  | -0.0078238 | 0.0010666  |
| 2                                                                                                     | N  | -2.1173589 | -0.1256075 | -0.0547602 |
| 3                                                                                                     | C  | -2.7311242 | -0.6965912 | -1.1124651 |
| 4                                                                                                     | C  | -4.1320321 | -0.8053089 | -1.1908072 |
| 5                                                                                                     | C  | -4.8947341 | -0.3015131 | -0.1193241 |
| 6                                                                                                     | H  | -5.9914441 | -0.3711197 | -0.1444306 |
| 7                                                                                                     | C  | -4.2513197 | 0.2908249  | 0.9846544  |
| 8                                                                                                     | H  | -4.8170235 | 0.6900504  | 1.8369732  |
| 9                                                                                                     | C  | -2.8458182 | 0.3595471  | 0.9715778  |
| 10                                                                                                    | C  | -1.7545408 | -1.1482365 | -2.1255915 |
| 11                                                                                                    | N  | -0.4744272 | -1.0344561 | -1.9105958 |
| 12                                                                                                    | C  | 0.2215050  | -1.6013469 | -3.1025434 |
| 13                                                                                                    | C  | -0.9626111 | -1.8864734 | -4.0854651 |
| 14                                                                                                    | O  | -2.1732549 | -1.6638311 | -3.2798588 |
| 15                                                                                                    | C  | -1.9846842 | 0.9305626  | 2.0285713  |
| 16                                                                                                    | N  | -0.6904568 | 0.9824461  | 1.8841633  |
| 17                                                                                                    | C  | -0.1444857 | 1.6485242  | 3.1053238  |
| 18                                                                                                    | C  | -1.4086571 | 1.7721956  | 4.0213146  |
| 19                                                                                                    | O  | -2.5316888 | 1.3957227  | 3.1501968  |
| 20                                                                                                    | N  | 2.1580602  | 0.0584022  | 0.0333852  |
| 21                                                                                                    | C  | 2.8607254  | -0.9925525 | 0.5204712  |
| 22                                                                                                    | C  | 4.2682783  | -0.9791763 | 0.5628506  |
| 23                                                                                                    | H  | 4.8238428  | -1.8460366 | 0.9469440  |
| 24                                                                                                    | C  | 4.9439088  | 0.1685052  | 0.1106263  |
| 25                                                                                                    | H  | 6.0414033  | 0.2128234  | 0.1431391  |
| 26                                                                                                    | C  | 4.2060802  | 1.2597766  | -0.3829665 |
| 27                                                                                                    | C  | 2.8021478  | 1.1619830  | -0.4185430 |
| 28                                                                                                    | C  | 1.9855500  | -2.0857008 | 0.9994301  |
| 29                                                                                                    | N  | 0.6893677  | -1.9252223 | 0.9350720  |
| 30                                                                                                    | C  | -0.0730729 | -3.0395079 | 1.5467756  |
| 31                                                                                                    | C  | 0.8948736  | -4.2585776 | 1.7146543  |
| 32                                                                                                    | S  | 2.6148951  | -3.5763699 | 1.6780852  |
| 33                                                                                                    | C  | 1.8716525  | 2.1903330  | -0.9348165 |
| 34                                                                                                    | N  | 0.5877850  | 1.9436665  | -0.9065332 |
| 35                                                                                                    | C  | -0.2306942 | 3.0036106  | -1.5415283 |
| 36                                                                                                    | C  | 0.6596114  | 4.2823663  | -1.6923961 |
| 37                                                                                                    | S  | 2.4202280  | 3.7198417  | -1.5944025 |
| 38                                                                                                    | H  | 4.7119430  | 2.1696016  | -0.7354776 |
| 39                                                                                                    | H  | -4.6041973 | -1.2716880 | -2.0658347 |
| 40                                                                                                    | H  | 0.5043747  | 4.8015737  | -2.6553879 |
| 41                                                                                                    | H  | 0.5007295  | 4.9957957  | -0.8621815 |
| 42                                                                                                    | H  | -1.0590794 | 3.2398432  | -0.8439828 |
| 43                                                                                                    | H  | -0.8703207 | -3.3245330 | 0.8313014  |
| 44                                                                                                    | H  | 0.7443603  | -4.7955245 | 2.6687849  |
| 45                                                                                                    | H  | 0.8130241  | -4.9746374 | 0.8754379  |
| 46                                                                                                    | H  | 0.8809381  | -0.8115362 | -3.5135871 |
| 47                                                                                                    | H  | -1.0032973 | -1.1751121 | -4.9312273 |
| 48                                                                                                    | H  | -0.9951532 | -2.9236845 | -4.4636399 |
| 49                                                                                                    | H  | -1.4034899 | 1.0580538  | 4.8660138  |
| 50                                                                                                    | H  | -1.5987641 | 2.7952808  | 4.3918377  |
| 51                                                                                                    | H  | 0.5966943  | 0.9653121  | 3.5641496  |
| 52                                                                                                    | C  | 1.0757928  | -2.8176679 | -2.7582505 |
| 53                                                                                                    | C  | 2.6780397  | -5.0934725 | -2.2407123 |
| 54                                                                                                    | C  | 0.4816454  | -4.0430192 | -2.3782505 |
| 55                                                                                                    | C  | 2.4803552  | -2.7473340 | -2.8642199 |
| 56                                                                                                    | C  | 3.2781632  | -3.8773167 | -2.6094609 |
| 57                                                                                                    | C  | 1.2772385  | -5.1730418 | -2.1228597 |
| 58                                                                                                    | H  | -0.6141452 | -4.1322361 | -2.3028484 |
| 59                                                                                                    | H  | 2.9546465  | -1.8038125 | -3.1767227 |
| 60                                                                                                    | H  | 4.3704491  | -3.8128941 | -2.7197989 |



|    |   |            |            |            |
|----|---|------------|------------|------------|
| 61 | H | 0.8014527  | -6.1281585 | -1.8550456 |
| 62 | H | 3.2980203  | -5.9833921 | -2.0601021 |
| 63 | C | -0.7478864 | -2.6033915 | 2.8496060  |
| 64 | C | -2.0184291 | -1.9125623 | 5.2836361  |
| 65 | C | 0.0137101  | -2.1612605 | 3.9567056  |
| 66 | C | -2.1500341 | -2.6926057 | 2.9795537  |
| 67 | C | -2.7835611 | -2.3464357 | 4.1871712  |
| 68 | C | -0.6179941 | -1.8233533 | 5.1657915  |
| 69 | H | 1.1107579  | -2.1057215 | 3.8882018  |
| 70 | H | -2.7532054 | -3.0606689 | 2.1346778  |
| 71 | H | -3.8757673 | -2.4365161 | 4.2785976  |
| 72 | H | -0.0125982 | -1.5076569 | 6.0284026  |
| 73 | H | -2.5100609 | -1.6627969 | 6.2351290  |
| 74 | C | 0.5399600  | 2.9747645  | 2.7877584  |
| 75 | C | 1.8049922  | 5.4570468  | 2.2851105  |
| 76 | C | 1.9189964  | 3.1407864  | 3.0316703  |
| 77 | C | -0.2016912 | 4.0717591  | 2.2920948  |
| 78 | C | 0.4258063  | 5.3047977  | 2.0454787  |
| 79 | C | 2.5499040  | 4.3725501  | 2.7792103  |
| 80 | H | 2.5041374  | 2.3043104  | 3.4450602  |
| 81 | H | -1.2853282 | 3.9770908  | 2.1168998  |
| 82 | H | -0.1678952 | 6.1585375  | 1.6860719  |
| 83 | H | 3.6229776  | 4.4907189  | 2.9884543  |
| 84 | H | 2.2923585  | 6.4259851  | 2.1046090  |
| 85 | C | -0.8479543 | 2.5182124  | -2.8548229 |
| 86 | C | -2.0231497 | 1.7340148  | -5.3080662 |
| 87 | C | -2.2507143 | 2.4765277  | -2.9988726 |
| 88 | C | -0.0370896 | 2.1577899  | -3.9567496 |
| 89 | C | -0.6217749 | 1.7744475  | -5.1759304 |
| 90 | C | -2.8366562 | 2.0840943  | -4.2164106 |
| 91 | H | -2.8936120 | 2.7763472  | -2.1564405 |
| 92 | H | 1.0598932  | 2.2033397  | -3.8771449 |
| 93 | H | 0.0191320  | 1.5247403  | -6.0344896 |
| 94 | H | -3.9314456 | 2.0732904  | -4.3198126 |
| 95 | H | -2.4796990 | 1.4496885  | -6.2673338 |

[Fe((S)-L<sup>1</sup>Ph)((R)-L<sup>2</sup>Ph)]<sup>2+</sup> (**1**<sup>2+</sup>), low-spin

|    |    |            |            |            |
|----|----|------------|------------|------------|
| 1  | Fe | 0.0000000  | 0.0000001  | 0.0087686  |
| 2  | N  | 0.0000000  | -0.0000002 | 1.9253081  |
| 3  | C  | 1.1771345  | 0.0670159  | 2.6084894  |
| 4  | C  | 1.2175920  | 0.0737081  | 4.0129441  |
| 5  | C  | 0.0000001  | -0.0000001 | 4.7174574  |
| 6  | H  | 0.0000002  | -0.0000001 | 5.8162552  |
| 7  | C  | -1.2175919 | -0.0737082 | 4.0129442  |
| 8  | H  | -2.1832890 | -0.1285005 | 4.5327160  |
| 9  | C  | -1.1771344 | -0.0670160 | 2.6084896  |
| 10 | C  | 2.2803197  | 0.0754721  | 1.6494142  |
| 11 | N  | 1.9836825  | 0.0606052  | 0.3710306  |
| 12 | C  | 3.2747427  | 0.0195209  | -0.3859198 |
| 13 | C  | 4.3201576  | -0.1577407 | 0.7678870  |
| 14 | O  | 3.5581619  | 0.0430996  | 2.0100833  |
| 15 | C  | -2.2803197 | -0.0754721 | 1.6494143  |
| 16 | N  | -1.9836825 | -0.0606051 | 0.3710306  |
| 17 | C  | -3.2747427 | -0.0195211 | -0.3859198 |
| 18 | C  | -4.3201574 | 0.1577410  | 0.7678871  |
| 19 | O  | -3.5581618 | -0.0430996 | 2.0100833  |
| 20 | N  | 0.0000003  | 0.0000003  | -1.8880074 |
| 21 | C  | -0.0288937 | 1.1854079  | -2.5638653 |
| 22 | C  | -0.0305571 | 1.2181383  | -3.9702197 |
| 23 | H  | -0.0501121 | 2.1795523  | -4.5012539 |
| 24 | C  | 0.0000010  | 0.0000007  | -4.6740602 |
| 25 | H  | 0.0000014  | 0.0000010  | -5.7727407 |

|    |   |            |            |            |
|----|---|------------|------------|------------|
| 26 | C | 0.0305587  | -1.2181370 | -3.9702200 |
| 27 | C | 0.0288946  | -1.1854072 | -2.5638656 |
| 28 | C | -0.0125056 | 2.2998359  | -1.6146576 |
| 29 | N | -0.0285577 | 1.9742826  | -0.3364264 |
| 30 | C | -0.0164658 | 3.1564813  | 0.5686238  |
| 31 | C | 0.4707200  | 4.3776224  | -0.2739511 |
| 32 | S | 0.0850626  | 3.9932489  | -2.0448003 |
| 33 | C | 0.0125060  | -2.2998354 | -1.6146582 |
| 34 | N | 0.0285576  | -1.9742824 | -0.3364269 |
| 35 | C | 0.0164654  | -3.1564812 | 0.5686231  |
| 36 | C | -0.4707203 | -4.3776221 | -0.2739523 |
| 37 | S | -0.0850621 | -3.9932483 | -2.0448012 |
| 38 | H | 2.1832891  | 0.1285005  | 4.5327159  |
| 39 | H | 0.0501143  | -2.1795509 | -4.5012545 |
| 40 | H | -0.0397648 | 5.3151881  | 0.0101759  |
| 41 | H | 1.5656878  | 4.5206721  | -0.2096909 |
| 42 | H | 0.0397641  | -5.3151880 | 0.0101749  |
| 43 | H | -1.5656881 | -4.5206714 | -0.2096928 |
| 44 | H | -4.7420545 | 1.1789160  | 0.8125743  |
| 45 | H | -5.1377772 | -0.5844500 | 0.7503980  |
| 46 | H | 4.7420549  | -1.1789156 | 0.8125744  |
| 47 | H | 5.1377770  | 0.5844506  | 0.7503980  |
| 48 | H | -3.2649831 | 0.8845791  | -1.0254491 |
| 49 | H | 3.2649833  | -0.8845795 | -1.0254488 |
| 50 | H | -0.7350973 | -2.9559349 | 1.3576304  |
| 51 | H | 0.7350968  | 2.9559348  | 1.3576312  |
| 52 | C | 3.5206876  | 1.2351563  | -1.2738400 |
| 53 | C | 4.1720217  | 3.4359925  | -2.9317834 |
| 54 | C | 3.7854103  | 2.5059644  | -0.7123193 |
| 55 | C | 3.5825452  | 1.0860346  | -2.6747014 |
| 56 | C | 3.9046591  | 2.1789910  | -3.5000757 |
| 57 | C | 4.1120079  | 3.5972722  | -1.5347565 |
| 58 | H | 3.7688845  | 2.6438687  | 0.3807739  |
| 59 | H | 3.4041325  | 0.0978546  | -3.1270284 |
| 60 | H | 3.9691143  | 2.0420568  | -4.5893122 |
| 61 | H | 4.3419771  | 4.5740190  | -1.0840144 |
| 62 | H | 4.4438608  | 4.2862920  | -3.5735118 |
| 63 | C | -1.3612605 | 3.4102409  | 1.2520544  |
| 64 | C | -3.7898172 | 4.0820666  | 2.5436044  |
| 65 | C | -2.5402399 | 3.6202487  | 0.4995626  |
| 66 | C | -1.4171688 | 3.5423843  | 2.6564200  |
| 67 | C | -2.6229598 | 3.8774148  | 3.2991430  |
| 68 | C | -3.7446447 | 3.9554094  | 1.1420447  |
| 69 | H | -2.5137967 | 3.5610843  | -0.5990162 |
| 70 | H | -0.5031460 | 3.4015817  | 3.2549932  |
| 71 | H | -2.6472456 | 3.9917867  | 4.3925606  |
| 72 | H | -4.6490941 | 4.1417968  | 0.5440614  |
| 73 | H | -4.7299466 | 4.3572832  | 3.0429173  |
| 74 | C | -3.5206877 | -1.2351568 | -1.2738395 |
| 75 | C | -4.1720220 | -3.4359937 | -2.9317821 |
| 76 | C | -3.5825450 | -1.0860358 | -2.6747010 |
| 77 | C | -3.7854107 | -2.5059646 | -0.7123183 |
| 78 | C | -4.1120084 | -3.5972727 | -1.5347552 |
| 79 | C | -3.9046590 | -2.1789925 | -3.5000748 |
| 80 | H | -3.4041318 | -0.0978559 | -3.1270283 |
| 81 | H | -3.7688848 | -2.6438685 | 0.3807750  |
| 82 | H | -4.3419781 | -4.5740192 | -1.0840125 |
| 83 | H | -3.9691139 | -2.0420589 | -4.5893114 |
| 84 | H | -4.4438613 | -4.2862933 | -3.5735102 |
| 85 | C | 1.3612601  | -3.4102409 | 1.2520539  |
| 86 | C | 3.7898165  | -4.0820664 | 2.5436042  |
| 87 | C | 1.4171682  | -3.5423842 | 2.6564195  |

|    |   |           |            |            |
|----|---|-----------|------------|------------|
| 88 | C | 2.5402396 | -3.6202486 | 0.4995621  |
| 89 | C | 3.7446443 | -3.9554092 | 1.1420445  |
| 90 | C | 2.6229591 | -3.8774146 | 3.2991426  |
| 91 | H | 0.5031452 | -3.4015817 | 3.2549925  |
| 92 | H | 2.5137966 | -3.5610843 | -0.5990166 |
| 93 | H | 4.6490938 | -4.1417965 | 0.5440613  |
| 94 | H | 2.6472447 | -3.9917866 | 4.3925603  |
| 95 | H | 4.7299459 | -4.3572830 | 3.0429172  |

**[Fe((S)-L<sup>1</sup>iPr)((R)-L<sup>2</sup>iPr)]<sup>2+</sup> (2<sup>2+</sup>), high-spin**

|    |    |            |            |            |
|----|----|------------|------------|------------|
| 1  | Fe | 0.0018485  | 0.0017959  | -0.0721019 |
| 2  | N  | 0.0261911  | 0.0001178  | 2.0690386  |
| 3  | C  | 1.2034745  | 0.0162596  | 2.7358361  |
| 4  | C  | 1.2664842  | 0.0093276  | 4.1414143  |
| 5  | C  | 0.0558816  | 0.0014940  | 4.8606304  |
| 6  | H  | 0.0675058  | 0.0022923  | 5.9596258  |
| 7  | C  | -1.1697276 | -0.0078146 | 4.1672920  |
| 8  | H  | -2.1310381 | -0.0143432 | 4.6985681  |
| 9  | C  | -1.1367592 | -0.0163873 | 2.7607931  |
| 10 | C  | 2.3530344  | 0.0396081  | 1.8088184  |
| 11 | N  | 2.1716908  | 0.1139390  | 0.5186793  |
| 12 | C  | 3.5213785  | 0.1531991  | -0.1076106 |
| 13 | C  | 4.4725617  | -0.1212064 | 1.1008530  |
| 14 | O  | 3.5947179  | -0.0374401 | 2.2806440  |
| 15 | C  | -2.3058978 | -0.0435242 | 1.8587414  |
| 16 | N  | -2.1515448 | -0.1187819 | 0.5652279  |
| 17 | C  | -3.5133879 | -0.1606490 | -0.0335964 |
| 18 | C  | -4.4411083 | 0.1055055  | 1.1950548  |
| 19 | O  | -3.5376558 | 0.0297681  | 2.3562326  |
| 20 | N  | -0.0221353 | 0.0098197  | -2.2037383 |
| 21 | C  | -0.0782606 | 1.1856459  | -2.8720994 |
| 22 | C  | -0.0950702 | 1.2308179  | -4.2797251 |
| 23 | H  | -0.1444512 | 2.1922829  | -4.8098045 |
| 24 | C  | -0.0502093 | 0.0187399  | -4.9908294 |
| 25 | H  | -0.0612346 | 0.0222792  | -6.0897992 |
| 26 | C  | 0.0086183  | -1.1978327 | -4.2885889 |
| 27 | C  | 0.0203116  | -1.1616840 | -2.8806648 |
| 28 | C  | -0.0950644 | 2.3640542  | -1.9707670 |
| 29 | N  | -0.1802202 | 2.1816835  | -0.6801885 |
| 30 | C  | -0.2112082 | 3.4447531  | 0.0915818  |
| 31 | C  | 0.2137294  | 4.6188005  | -0.8504610 |
| 32 | S  | 0.0631559  | 3.9986938  | -2.5860314 |
| 33 | C  | 0.0534914  | -2.3460607 | -1.9877320 |
| 34 | N  | 0.1624864  | -2.1725723 | -0.6977526 |
| 35 | C  | 0.2005319  | -3.4404594 | 0.0656789  |
| 36 | C  | -0.2410939 | -4.6076690 | -0.8773254 |
| 37 | S  | -0.1207511 | -3.9760896 | -2.6110663 |
| 38 | H  | 2.2391598  | 0.0156581  | 4.6515004  |
| 39 | H  | 0.0465773  | -2.1559493 | -4.8256163 |
| 40 | H  | -0.4282465 | 5.5125739  | -0.7458806 |
| 41 | H  | 1.2656586  | 4.9251803  | -0.6987655 |
| 42 | H  | 0.4025347  | -5.5021374 | -0.7895891 |
| 43 | H  | -1.2901742 | -4.9152583 | -0.7090155 |
| 44 | H  | -4.8960733 | 1.1146154  | 1.2048881  |
| 45 | H  | -5.2334921 | -0.6497210 | 1.3430254  |
| 46 | H  | 4.9185044  | -1.1344598 | 1.1010713  |
| 47 | H  | 5.2751874  | 0.6262989  | 1.2321177  |
| 48 | H  | -3.5901258 | 0.6715734  | -0.7628214 |
| 49 | H  | -0.5496431 | -3.3468699 | 0.8785169  |
| 50 | C  | 3.7881618  | 1.4797904  | -0.8760965 |
| 51 | H  | 2.9203577  | 1.5938906  | -1.5612026 |
| 52 | C  | 5.0596052  | 1.3552270  | -1.7360894 |

|    |   |            |            |            |
|----|---|------------|------------|------------|
| 53 | H | 5.9651545  | 1.2109691  | -1.1116288 |
| 54 | H | 5.2218879  | 2.2761747  | -2.3285478 |
| 55 | H | 4.9991951  | 0.5053098  | -2.4446318 |
| 56 | C | 3.8399621  | 2.7203038  | 0.0335886  |
| 57 | H | 4.7542905  | 2.7423948  | 0.6601167  |
| 58 | H | 2.9657298  | 2.7878249  | 0.7118230  |
| 59 | H | 3.8621322  | 3.6429342  | -0.5788235 |
| 60 | C | -1.5854837 | 3.6537814  | 0.8039017  |
| 61 | H | -1.7632681 | 2.7068552  | 1.3576411  |
| 62 | C | -2.7623182 | 3.8649447  | -0.1648501 |
| 63 | H | -2.8447556 | 3.0538866  | -0.9152438 |
| 64 | H | -2.6856188 | 4.8244682  | -0.7143866 |
| 65 | H | -3.7167738 | 3.9013972  | 0.3965717  |
| 66 | C | -1.4900641 | 4.7839397  | 1.8466486  |
| 67 | H | -0.6814453 | 4.5999947  | 2.5818166  |
| 68 | H | -2.4404211 | 4.8725030  | 2.4074460  |
| 69 | H | -1.3020831 | 5.7715168  | 1.3790458  |
| 70 | C | 1.5830345  | -3.6598366 | 0.7585536  |
| 71 | H | 1.7727710  | -2.7174693 | 1.3160139  |
| 72 | C | 2.7457023  | -3.8706104 | -0.2271339 |
| 73 | H | 3.7074026  | -3.9175924 | 0.3210220  |
| 74 | H | 2.8233019  | -3.0541509 | -0.9722764 |
| 75 | H | 2.6553226  | -4.8252555 | -0.7830956 |
| 76 | C | 1.4958258  | -4.7960996 | 1.7953682  |
| 77 | H | 2.4537522  | -4.8938869 | 2.3415252  |
| 78 | H | 1.2950365  | -5.7795115 | 1.3243268  |
| 79 | H | 0.6991724  | -4.6120223 | 2.5434754  |
| 80 | C | -3.7897290 | -1.4852107 | -0.8022643 |
| 81 | H | -2.9297302 | -1.5971175 | -1.4975677 |
| 82 | C | -5.0714503 | -1.3597370 | -1.6466784 |
| 83 | H | -5.2391599 | -2.2789726 | -2.2403217 |
| 84 | H | -5.0213360 | -0.5073087 | -2.3530468 |
| 85 | H | -5.9696897 | -1.2194600 | -1.0108076 |
| 86 | C | -3.8303266 | -2.7281107 | 0.1047081  |
| 87 | H | -2.9530646 | -2.7918913 | 0.7793799  |
| 88 | H | -3.8499548 | -3.6495483 | -0.5095592 |
| 89 | H | -4.7419451 | -2.7571139 | 0.7348602  |
| 90 | H | 0.5502288  | 3.3492945  | 0.8936869  |
| 91 | H | 3.5804489  | -0.6763620 | -0.8415267 |

[Fe((S)-L<sup>1</sup>iPr)((R)-L<sup>2</sup>iPr)]<sup>2+</sup> (2<sup>2+</sup>), low-spin

|    |    |            |            |            |
|----|----|------------|------------|------------|
| 1  | Fe | 0.0014106  | -0.0001668 | -0.0718399 |
| 2  | N  | 0.0199835  | -0.0040503 | 1.8446915  |
| 3  | C  | 1.2023107  | 0.0893854  | 2.5173617  |
| 4  | C  | 1.2565588  | 0.0882385  | 3.9217344  |
| 5  | C  | 0.0471347  | -0.0055460 | 4.6381167  |
| 6  | H  | 0.0577661  | -0.0059910 | 5.7368761  |
| 7  | C  | -1.1759565 | -0.0989739 | 3.9452058  |
| 8  | H  | -2.1349911 | -0.1707092 | 4.4756860  |
| 9  | C  | -1.1490689 | -0.0986435 | 2.5401351  |
| 10 | C  | 2.2948325  | 0.1345790  | 1.5453727  |
| 11 | N  | 1.9868515  | 0.1627522  | 0.2694874  |
| 12 | C  | 3.2709835  | 0.1726034  | -0.4925571 |
| 13 | C  | 4.3137858  | -0.1332338 | 0.6268559  |
| 14 | O  | 3.5770608  | 0.0744924  | 1.8876957  |
| 15 | C  | -2.2604058 | -0.1419523 | 1.5897331  |
| 16 | N  | -1.9767782 | -0.1660773 | 0.3081593  |
| 17 | C  | -3.2749636 | -0.1727890 | -0.4293970 |
| 18 | C  | -4.2963919 | 0.1292104  | 0.7106944  |
| 19 | O  | -3.5359917 | -0.0828128 | 1.9565902  |
| 20 | N  | -0.0213705 | 0.0046398  | -1.9697237 |
| 21 | C  | -0.0829442 | 1.1900455  | -2.6439500 |

---

|    |   |            |            |            |
|----|---|------------|------------|------------|
| 22 | C | -0.0992283 | 1.2268645  | -4.0505721 |
| 23 | H | -0.1441307 | 2.1889861  | -4.5795049 |
| 24 | C | -0.0587946 | 0.0117237  | -4.7592296 |
| 25 | H | -0.0737371 | 0.0144891  | -5.8578198 |
| 26 | C | 0.0004077  | -1.2069763 | -4.0580496 |
| 27 | C | 0.0223041  | -1.1773629 | -2.6513652 |
| 28 | C | -0.0929419 | 2.3047994  | -1.6932764 |
| 29 | N | -0.1282526 | 1.9873987  | -0.4136631 |
| 30 | C | -0.1479661 | 3.1748007  | 0.4831227  |
| 31 | C | 0.3148098  | 4.4066313  | -0.3508733 |
| 32 | S | 0.0316760  | 3.9922783  | -2.1346532 |
| 33 | C | 0.0558842  | -2.2969599 | -1.7068090 |
| 34 | N | 0.1223375  | -1.9859741 | -0.4268699 |
| 35 | C | 0.1589614  | -3.1771689 | 0.4639893  |
| 36 | C | -0.3222256 | -4.4051966 | -0.3652229 |
| 37 | S | -0.0806929 | -3.9822602 | -2.1532851 |
| 38 | H | 2.2258129  | 0.1594405  | 4.4333355  |
| 39 | H | 0.0302676  | -2.1664008 | -4.5929335 |
| 40 | H | -0.2575456 | 5.3210849  | -0.1130687 |
| 41 | H | 1.3909246  | 4.6279309  | -0.2281899 |
| 42 | H | 0.2563643  | -5.3203699 | -0.1460336 |
| 43 | H | -1.3951188 | -4.6276404 | -0.2188188 |
| 44 | H | -4.6497867 | 1.1780322  | 0.7244194  |
| 45 | H | -5.1663644 | -0.5494514 | 0.7340324  |
| 46 | H | 4.6674213  | -1.1820523 | 0.6304326  |
| 47 | H | 5.1843695  | 0.5450590  | 0.6366288  |
| 48 | H | -3.2535993 | 0.6608777  | -1.1600040 |
| 49 | H | -0.5750269 | -2.9871975 | 1.2739526  |
| 50 | C | 3.5310595  | 1.4925336  | -1.2768660 |
| 51 | H | 2.6121950  | 1.6737611  | -1.8736043 |
| 52 | C | 4.6977711  | 1.2949356  | -2.2641744 |
| 53 | H | 5.6498428  | 1.0723443  | -1.7400689 |
| 54 | H | 4.8653782  | 2.2134006  | -2.8588967 |
| 55 | H | 4.5020208  | 0.4665349  | -2.9736074 |
| 56 | C | 3.7597211  | 2.7155627  | -0.3707570 |
| 57 | H | 4.7312829  | 2.6670286  | 0.1602113  |
| 58 | H | 2.9661130  | 2.8323209  | 0.3932993  |
| 59 | H | 3.7832170  | 3.6398105  | -0.9799520 |
| 60 | C | -1.5230730 | 3.3840540  | 1.1965005  |
| 61 | H | -1.7672914 | 2.4094470  | 1.6644120  |
| 62 | C | -2.6755568 | 3.7522859  | 0.2450437  |
| 63 | H | -2.8095013 | 3.0096029  | -0.5656494 |
| 64 | H | -2.5274722 | 4.7422566  | -0.2300008 |
| 65 | H | -3.6273759 | 3.8122030  | 0.8086017  |
| 66 | C | -1.3792493 | 4.4084396  | 2.3397035  |
| 67 | H | -0.5845046 | 4.1223956  | 3.0578019  |
| 68 | H | -2.3275731 | 4.4897695  | 2.9048916  |
| 69 | H | -1.1440723 | 5.4244915  | 1.9636218  |
| 70 | C | 1.5469781  | -3.3907050 | 1.1504567  |
| 71 | H | 1.8004580  | -2.4179023 | 1.6171250  |
| 72 | C | 2.6805803  | -3.7558574 | 0.1753992  |
| 73 | H | 3.6429697  | -3.8212430 | 0.7201194  |
| 74 | H | 2.8004741  | -3.0085904 | -0.6332291 |
| 75 | H | 2.5208559  | -4.7425500 | -0.3025358 |
| 76 | C | 1.4237584  | -4.4191679 | 2.2923300  |
| 77 | H | 2.3832399  | -4.5048016 | 2.8376537  |
| 78 | H | 1.1783446  | -5.4331027 | 1.9171908  |
| 79 | H | 0.6445928  | -4.1336889 | 3.0274301  |
| 80 | C | -3.5503165 | -1.4902453 | -1.2129679 |
| 81 | H | -2.6396244 | -1.6737761 | -1.8212307 |
| 82 | C | -4.7287555 | -1.2856708 | -2.1846676 |
| 83 | H | -4.9125315 | -2.2042272 | -2.7744090 |

---

|    |   |            |            |            |
|----|---|------------|------------|------------|
| 84 | H | -4.5356921 | -0.4607002 | -2.8988094 |
| 85 | H | -5.6710036 | -1.0532035 | -1.6473301 |
| 86 | C | -3.7730960 | -2.7146613 | -0.3068846 |
| 87 | H | -2.9754923 | -2.8335176 | 0.4527904  |
| 88 | H | -3.8004902 | -3.6380125 | -0.9173158 |
| 89 | H | -4.7416346 | -2.6668801 | 0.2296483  |
| 90 | H | 0.6020040  | 2.9832806  | 1.2778361  |
| 91 | H | 3.2355037  | -0.6583415 | -1.2257091 |

[Fe(*R*)-*L*<sup>1</sup>Ph)(bimpy)]<sup>2+</sup> (**3**<sup>2+</sup>), high-spin

|    |    |            |            |            |
|----|----|------------|------------|------------|
| 1  | Fe | 0.0005098  | -0.0004836 | -0.3908866 |
| 2  | N  | 0.0110065  | 0.0039114  | 1.7910219  |
| 3  | C  | -1.1615046 | -0.0767542 | 2.4624197  |
| 4  | C  | -1.1951435 | -0.0762657 | 3.8730548  |
| 5  | C  | 0.0230129  | 0.0161292  | 4.5675327  |
| 6  | H  | 0.0277367  | 0.0212150  | 5.6666299  |
| 7  | C  | 1.2350943  | 0.1021097  | 3.8617819  |
| 8  | H  | 2.1857187  | 0.1756869  | 4.4069806  |
| 9  | C  | 1.1892501  | 0.0900712  | 2.4514872  |
| 10 | C  | -2.3122803 | -0.1538477 | 1.5550695  |
| 11 | N  | -2.1341138 | -0.1405711 | 0.2230816  |
| 12 | C  | -3.4004807 | -0.2057487 | -0.3393386 |
| 13 | C  | -4.3742594 | -0.2649369 | 0.7075473  |
| 14 | N  | -3.6395832 | -0.2318443 | 1.8869087  |
| 15 | C  | 2.3321039  | 0.1597636  | 1.5336616  |
| 16 | N  | 2.1425061  | 0.1397454  | 0.2033175  |
| 17 | C  | 3.4043058  | 0.1988160  | -0.3701019 |
| 18 | C  | 4.3870827  | 0.2611080  | 0.6682304  |
| 19 | N  | 3.6623772  | 0.2364205  | 1.8538977  |
| 20 | N  | -0.0080937 | 0.0022323  | -2.5186677 |
| 21 | C  | -0.0842259 | -1.1659485 | -3.2043936 |
| 22 | C  | -0.0976403 | -1.2106619 | -4.6099377 |
| 23 | H  | -0.1642765 | -2.1754925 | -5.1306487 |
| 24 | C  | -0.0197803 | 0.0052033  | -5.3165004 |
| 25 | H  | -0.0242865 | 0.0063642  | -6.4153497 |
| 26 | C  | 0.0636229  | 1.2195792  | -4.6080271 |
| 27 | C  | 0.0618719  | 1.1719039  | -3.2025011 |
| 28 | C  | -0.1404689 | -2.3197399 | -2.2902050 |
| 29 | N  | -0.0675958 | -2.1410518 | -0.9988974 |
| 30 | C  | -0.1601308 | -3.4804841 | -0.3584466 |
| 31 | C  | -0.2615451 | -4.4471556 | -1.5912513 |
| 32 | O  | -0.2750280 | -3.5575174 | -2.7622579 |
| 33 | C  | 0.1245265  | 2.3238088  | -2.2863002 |
| 34 | N  | 0.0616938  | 2.1423301  | -0.9948684 |
| 35 | C  | 0.1547482  | 3.4806063  | -0.3523129 |
| 36 | C  | 0.2529840  | 4.4496173  | -1.5837115 |
| 37 | O  | 0.2536361  | 3.5626906  | -2.7568057 |
| 38 | H  | -2.1409399 | -0.1444451 | 4.4272988  |
| 39 | H  | 0.1255167  | 2.1855571  | -5.1271835 |
| 40 | H  | 0.6122573  | -5.1178189 | -1.6941965 |
| 41 | H  | -1.1908231 | -5.0450737 | -1.6175260 |
| 42 | H  | -0.6175795 | 5.1254638  | -1.6792346 |
| 43 | H  | 1.1855520  | 5.0422558  | -1.6149728 |
| 44 | H  | 1.0970931  | 3.5092895  | 0.2335846  |
| 45 | H  | -1.1015032 | -3.5092654 | 0.2291150  |
| 46 | C  | 0.9983066  | -3.7877213 | 0.5828274  |
| 47 | C  | 3.1347641  | -4.4865601 | 2.2982615  |
| 48 | C  | 2.3373774  | -3.6309373 | 0.1597597  |
| 49 | C  | 0.7438544  | -4.2935123 | 1.8750302  |
| 50 | C  | 1.8059116  | -4.6419364 | 2.7286945  |
| 51 | C  | 3.3984505  | -3.9778119 | 1.0123752  |
| 52 | H  | 2.5591314  | -3.2431701 | -0.8467153 |

|    |   |            |            |            |
|----|---|------------|------------|------------|
| 53 | H | -0.2949875 | -4.4342447 | 2.2125809  |
| 54 | H | 1.5933268  | -5.0500244 | 3.7275086  |
| 55 | H | 4.4364377  | -3.8659356 | 0.6662166  |
| 56 | H | 3.9652841  | -4.7746185 | 2.9590786  |
| 57 | C | -1.0024239 | 3.7854374  | 0.5914865  |
| 58 | C | -3.1366234 | 4.4818967  | 2.3108313  |
| 59 | C | -0.7462140 | 4.2918080  | 1.8831207  |
| 60 | C | -2.3421272 | 3.6269373  | 0.1710179  |
| 61 | C | -3.4020626 | 3.9727376  | 1.0254905  |
| 62 | C | -1.8071421 | 4.6389796  | 2.7387262  |
| 63 | H | 0.2930496  | 4.4339536  | 2.2187746  |
| 64 | H | -2.5653566 | 3.2388991  | -0.8350156 |
| 65 | H | -4.4405284 | 3.8596116  | 0.6812061  |
| 66 | H | -1.5931888 | 5.0475379  | 3.7370614  |
| 67 | H | -3.9662637 | 4.7691033  | 2.9731228  |
| 68 | H | 6.5157851  | 0.3722963  | 1.2043685  |
| 69 | C | 5.7671604  | 0.3261027  | 0.4016981  |
| 70 | C | 3.8065585  | 0.2010382  | -1.7242635 |
| 71 | H | 3.0659565  | 0.1523640  | -2.5330598 |
| 72 | H | 7.2080176  | 0.3753060  | -1.2074271 |
| 73 | C | 6.1411670  | 0.3263262  | -0.9474711 |
| 74 | C | 5.1776369  | 0.2646360  | -1.9921190 |
| 75 | H | 5.5259369  | 0.2669808  | -3.0346155 |
| 76 | H | -3.0798633 | -0.1698328 | -2.5050906 |
| 77 | C | -3.8138223 | -0.2162816 | -1.6900612 |
| 78 | C | -5.7563124 | -0.3352166 | 0.4527816  |
| 79 | H | -6.4981245 | -0.3792155 | 1.2618817  |
| 80 | C | -6.1415278 | -0.3437783 | -0.8932077 |
| 81 | H | -7.2103817 | -0.3971826 | -1.1439088 |
| 82 | H | -5.5438326 | -0.2937364 | -2.9857837 |
| 83 | C | -5.1869334 | -0.2850238 | -1.9462232 |
| 84 | H | -4.0297100 | -0.2444655 | 2.8296700  |
| 85 | H | 4.0603893  | 0.2524807  | 2.7932934  |

[Fe((R)-L<sup>1</sup>Ph)(bimpy)]<sup>2+</sup> (3<sup>2+</sup>), low-spin

|    |    |            |            |            |
|----|----|------------|------------|------------|
| 1  | Fe | -0.0001629 | -0.0003339 | -0.4630921 |
| 2  | N  | 0.0093152  | -0.0002129 | 1.4633337  |
| 3  | C  | -1.1722176 | -0.0322150 | 2.1482099  |
| 4  | C  | -1.1981330 | -0.0349805 | 3.5557329  |
| 5  | C  | 0.0230384  | -0.0000341 | 4.2515611  |
| 6  | H  | 0.0284033  | 0.0003033  | 5.3501679  |
| 7  | C  | 1.2373446  | 0.0344200  | 3.5438242  |
| 8  | H  | 2.1941160  | 0.0616094  | 4.0818683  |
| 9  | C  | 1.1975269  | 0.0313720  | 2.1365398  |
| 10 | C  | -2.2741195 | -0.0527500 | 1.2045165  |
| 11 | N  | -1.9770424 | -0.0487711 | -0.1138575 |
| 12 | C  | -3.1933694 | -0.0544878 | -0.7923991 |
| 13 | C  | -4.2498040 | -0.0614983 | 0.1753367  |
| 14 | N  | -3.6245422 | -0.0632353 | 1.4155724  |
| 15 | C  | 2.2900130  | 0.0526012  | v          |
| 16 | N  | 1.9805978  | 0.0490698  | -0.1336129 |
| 17 | C  | 3.1907109  | 0.0554939  | -0.8234711 |
| 18 | C  | 4.2560444  | 0.0635531  | 0.1344957  |
| 19 | N  | 3.6423188  | 0.0652267  | 1.3804811  |
| 20 | N  | -0.0082774 | -0.0006660 | -2.3708558 |
| 21 | C  | -0.0125972 | -1.1814453 | -3.0543476 |
| 22 | C  | -0.0210550 | -1.2216983 | -4.4593741 |
| 23 | H  | -0.0287548 | -2.1886702 | -4.9798804 |
| 24 | C  | -0.0198747 | -0.0012276 | -5.1639513 |
| 25 | H  | -0.0246634 | -0.0014396 | -6.2626800 |
| 26 | C  | -0.0125828 | 1.2195265  | -4.4598675 |
| 27 | C  | -0.0092791 | 1.1798724  | -3.0548097 |

|    |   |            |            |            |
|----|---|------------|------------|------------|
| 28 | C | -0.0245412 | -2.2804668 | -2.0914747 |
| 29 | N | 0.0043804  | -1.9757468 | -0.8145698 |
| 30 | C | -0.0926306 | -3.2523671 | -0.0466307 |
| 31 | C | -0.1151177 | -4.3278020 | -1.1891899 |
| 32 | O | -0.0971752 | -3.5598839 | -2.4428468 |
| 33 | C | 0.0113117  | 2.2792063  | -2.0923741 |
| 34 | N | -0.0099581 | 1.9748029  | -0.8152506 |
| 35 | C | 0.0909782  | 3.2516472  | -0.0481669 |
| 36 | C | 0.1096158  | 4.3266488  | -1.1911022 |
| 37 | O | 0.0847476  | 3.5584248  | -2.4444345 |
| 38 | H | -2.1494843 | -0.0618673 | 4.1033516  |
| 39 | H | -0.0092567 | 2.1862830  | -4.9808186 |
| 40 | H | 0.7758295  | -4.9827292 | -1.1873662 |
| 41 | H | -1.0284956 | -4.9499635 | -1.1935676 |
| 42 | H | -0.7804291 | 4.9827677  | -1.1851470 |
| 43 | H | 1.0238268  | 4.9475094  | -1.2000675 |
| 44 | H | 1.0654511  | 3.2433291  | 0.4822637  |
| 45 | H | -1.0653356 | -3.2439579 | 0.4871014  |
| 46 | C | 1.0132747  | -3.4551026 | 0.9819767  |
| 47 | C | 3.0299923  | -3.9289088 | 2.9103504  |
| 48 | C | 2.3700977  | -3.5414179 | 0.5947148  |
| 49 | C | 0.6830627  | -3.6092837 | 2.3447163  |
| 50 | C | 1.6834466  | -3.8460322 | 3.3044753  |
| 51 | C | 3.3711277  | -3.7729499 | 1.5531264  |
| 52 | H | 2.6569460  | -3.4416583 | -0.4637556 |
| 53 | H | -0.3711373 | -3.5584769 | 2.6586630  |
| 54 | H | 1.4069694  | -3.9862803 | 4.3596072  |
| 55 | H | 4.4208884  | -3.8549515 | 1.2352518  |
| 56 | H | 3.8116928  | -4.1363346 | 3.6556282  |
| 57 | C | -1.0118660 | 3.4545515  | 0.9838258  |
| 58 | C | -3.0234544 | 3.9280284  | 2.9176929  |
| 59 | C | -0.6781367 | 3.6073032  | 2.3458472  |
| 60 | C | -2.3696588 | 3.5420303  | 0.6001083  |
| 61 | C | -3.3680982 | 3.7733341  | 1.5612080  |
| 62 | C | -1.6759537 | 3.8439051  | 3.3083194  |
| 63 | H | 0.3767303  | 3.5549315  | 2.6572701  |
| 64 | H | -2.6595582 | 3.4429920  | -0.4576050 |
| 65 | H | -4.4185756 | 3.8561862  | 1.2459513  |
| 66 | H | -1.3966988 | 3.9830038  | 4.3628699  |
| 67 | H | -3.8031843 | 4.1353279  | 3.6650701  |
| 68 | H | 6.4185134  | 0.0753979  | 0.5069487  |
| 69 | C | 5.6118479  | 0.0680365  | -0.2385688 |
| 70 | C | 3.4938042  | 0.0538751  | -2.2042685 |
| 71 | H | 2.7025649  | 0.0507263  | -2.9625904 |
| 72 | H | 6.9299691  | 0.0663743  | -1.9511010 |
| 73 | C | 5.8850712  | 0.0634160  | -1.6111662 |
| 74 | C | 4.8420928  | 0.0568198  | -2.5760774 |
| 75 | H | 5.1062572  | 0.0551726  | -3.6429732 |
| 76 | H | -2.7238545 | -0.0500029 | -2.9351689 |
| 77 | C | -3.5085198 | -0.0526748 | -2.1703879 |
| 78 | C | -5.6089351 | -0.0649971 | -0.1856622 |
| 79 | H | -6.4090793 | -0.0716019 | 0.5671776  |
| 80 | C | -5.8942869 | -0.0601659 | -1.5557579 |
| 81 | H | -6.9424087 | -0.0621980 | -1.8864020 |
| 82 | H | -5.1339370 | -0.0523938 | -3.5943444 |
| 83 | C | -4.8601114 | -0.0544006 | -2.5301155 |
| 84 | H | -4.0917841 | -0.0405968 | 2.3218113  |
| 85 | H | 4.1182182  | 0.0437992  | 2.2822211  |

---

[Fe(*(R)*-*L*<sup>2</sup>Ph)(bimpy)]<sup>2+</sup> (4<sup>2+</sup>), high-spin

|   |    |            |            |            |
|---|----|------------|------------|------------|
| 1 | Fe | -0.0017266 | -0.0004788 | -0.4414498 |
| 2 | N  | 0.0050189  | 0.0001407  | 1.7425618  |



|    |   |            |            |            |
|----|---|------------|------------|------------|
| 3  | C | -1.1722567 | 0.0115664  | 2.4095003  |
| 4  | C | -1.2081266 | 0.0078844  | 3.8202487  |
| 5  | C | 0.0131514  | 0.0004974  | 4.5158480  |
| 6  | H | 0.0163452  | 0.0006223  | 5.6150375  |
| 7  | C | 1.2303342  | -0.0069711 | 3.8131311  |
| 8  | H | 2.1826178  | -0.0076783 | 4.3601877  |
| 9  | C | 1.1861413  | -0.0110152 | 2.4025908  |
| 10 | C | -2.3229014 | 0.0154957  | 1.4988833  |
| 11 | N | -2.1418565 | -0.0517972 | 0.1691337  |
| 12 | C | -3.4074898 | -0.0358223 | -0.3970628 |
| 13 | C | -4.3842477 | 0.0454850  | 0.6453324  |
| 14 | N | -3.6522559 | 0.0704348  | 1.8259561  |
| 15 | C | 2.3312381  | -0.0146714 | 1.4850403  |
| 16 | N | 2.1421123  | 0.0530612  | 0.1564168  |
| 17 | C | 3.4043745  | 0.0380364  | -0.4173736 |
| 18 | C | 4.3874119  | -0.0430799 | 0.6191159  |
| 19 | N | 3.6625655  | -0.0691660 | 1.8040828  |
| 20 | N | -0.0118889 | -0.0024629 | -2.5446329 |
| 21 | C | -0.0803117 | -1.1783962 | -3.2241317 |
| 22 | C | -0.0985846 | -1.2171766 | -4.6309950 |
| 23 | H | -0.1643776 | -2.1776664 | -5.1614260 |
| 24 | C | -0.0313059 | -0.0047142 | -5.3414879 |
| 25 | H | -0.0389961 | -0.0056178 | -6.4401233 |
| 26 | C | 0.0456665  | 1.2088992  | -4.6339815 |
| 27 | C | 0.0470631  | 1.1724283  | -3.2269478 |
| 28 | C | -0.1393079 | -2.3454033 | -2.3194919 |
| 29 | N | -0.1103202 | -2.1300823 | -1.0291577 |
| 30 | C | -0.1425479 | -3.3584952 | -0.2095365 |
| 31 | C | -0.4397797 | -4.5858500 | -1.1483098 |
| 32 | S | -0.2526923 | -3.9982847 | -2.8931486 |
| 33 | C | 0.1176974  | 2.3408537  | -2.3249004 |
| 34 | N | 0.1033920  | 2.1272920  | -1.0340554 |
| 35 | C | 0.1453111  | 3.3567114  | -0.2164881 |
| 36 | C | 0.4346075  | 4.5823617  | -1.1598552 |
| 37 | S | 0.2261964  | 3.9929198  | -2.9018272 |
| 38 | H | -2.1570723 | 0.0088331  | 4.3731037  |
| 39 | H | 0.1034838  | 2.1685290  | -5.1668858 |
| 40 | H | 0.2655061  | -5.4207418 | -0.9838306 |
| 41 | H | -1.4720731 | -4.9653071 | -1.0308362 |
| 42 | H | -0.2672898 | 5.4186874  | -0.9883254 |
| 43 | H | 1.4689432  | 4.9599112  | -1.0547807 |
| 44 | H | 0.9989166  | 3.2512367  | 0.4844505  |
| 45 | H | -0.9894790 | -3.2533580 | 0.4995027  |
| 46 | C | 1.1305696  | -3.5316346 | 0.6193301  |
| 47 | C | 3.4591003  | -4.0240877 | 2.1492634  |
| 48 | C | 2.4071763  | -3.4893112 | 0.0151313  |
| 49 | C | 1.0360230  | -3.8241550 | 1.9964363  |
| 50 | C | 2.1923536  | -4.0741075 | 2.7576980  |
| 51 | C | 3.5630043  | -3.7290115 | 0.7765844  |
| 52 | H | 2.5040787  | -3.2778574 | -1.0603193 |
| 53 | H | 0.0461596  | -3.8858731 | 2.4755267  |
| 54 | H | 2.1007643  | -4.3242195 | 3.8248601  |
| 55 | H | 4.5499671  | -3.7002466 | 0.2922022  |
| 56 | H | 4.3637693  | -4.2345910 | 2.7383595  |
| 57 | C | -1.1196185 | 3.5320524  | 0.6244598  |
| 58 | C | -3.4328353 | 4.0268613  | 2.1763337  |
| 59 | C | -1.0113889 | 3.8257891  | 2.0002483  |
| 60 | C | -2.4020206 | 3.4899079  | 0.0325926  |
| 61 | C | -3.5503350 | 3.7306548  | 0.8050332  |
| 62 | C | -2.1601986 | 4.0769703  | 2.7724400  |
| 63 | H | -0.0168705 | 3.8870518  | 2.4696443  |
| 64 | H | -2.5090878 | 3.2777631  | -1.0417326 |

|    |   |            |            |            |
|----|---|------------|------------|------------|
| 65 | H | -4.5419878 | 3.7021930  | 0.3302900  |
| 66 | H | -2.0582645 | 4.3279635  | 3.8384552  |
| 67 | H | -4.3315975 | 4.2383472  | 2.7740746  |
| 68 | H | 6.5180794  | -0.1392004 | 1.1515064  |
| 69 | C | 5.7681927  | -0.0802566 | 0.3507340  |
| 70 | C | 3.8052740  | 0.0844679  | -1.7708909 |
| 71 | H | 3.0626102  | 0.1472063  | -2.5767055 |
| 72 | H | 7.2088831  | -0.0587350 | -1.2591400 |
| 73 | C | 6.1414113  | -0.0341609 | -0.9977684 |
| 74 | C | 5.1768142  | 0.0465884  | -2.0404954 |
| 75 | H | 5.5251799  | 0.0813531  | -3.0823793 |
| 76 | H | -3.0788412 | -0.1446939 | -2.5585324 |
| 77 | C | -3.8165533 | -0.0814773 | -1.7481320 |
| 78 | C | -5.7665973 | 0.0837805  | 0.3852074  |
| 79 | H | -6.5115401 | 0.1429711  | 1.1904326  |
| 80 | C | -6.1479799 | 0.0385045  | -0.9610234 |
| 81 | H | -7.2168907 | 0.0639907  | -1.2159204 |
| 82 | H | -5.5442390 | -0.0767885 | -3.0494391 |
| 83 | C | -5.1896923 | -0.0425552 | -2.0095304 |
| 84 | H | -4.0435739 | 0.1467769  | 2.7651745  |
| 85 | H | 4.0594955  | -0.1458823 | 2.7409081  |

[Fe(*R*)-L<sup>2</sup>Ph)(bimpy)]<sup>2+</sup> (4<sup>2+</sup>), low-spin

|    |    |            |            |            |
|----|----|------------|------------|------------|
| 1  | Fe | -0.0014927 | -0.0011096 | -0.3736787 |
| 2  | N  | 0.0039591  | 0.0003063  | 1.5542311  |
| 3  | C  | -1.1796997 | -0.0311655 | 2.2368227  |
| 4  | C  | -1.2082001 | -0.0394804 | 3.6445742  |
| 5  | C  | 0.0117364  | 0.0000981  | 4.3429808  |
| 6  | H  | 0.0147868  | -0.0000657 | 5.4416158  |
| 7  | C  | 1.2277595  | 0.0399089  | 3.6378135  |
| 8  | H  | 2.1830292  | 0.0702819  | 4.1784710  |
| 9  | C  | 1.1913872  | 0.0317952  | 2.2301779  |
| 10 | C  | -2.2799008 | -0.0409812 | 1.2907363  |
| 11 | N  | -1.9797313 | -0.0198688 | -0.0268820 |
| 12 | C  | -3.1936169 | -0.0193531 | -0.7088056 |
| 13 | C  | -4.2523066 | -0.0413604 | 0.2561308  |
| 14 | N  | -3.6308299 | -0.0556848 | 1.4977899  |
| 15 | C  | 2.2861484  | 0.0422544  | 1.2777865  |
| 16 | N  | 1.9787650  | 0.0202854  | -0.0381973 |
| 17 | C  | 3.1889326  | 0.0213047  | -0.7266479 |
| 18 | C  | 4.2528432  | 0.0451438  | 0.2325030  |
| 19 | N  | 3.6381598  | 0.0590343  | 1.4774795  |
| 20 | N  | -0.0104178 | -0.0036063 | -2.2650736 |
| 21 | C  | -0.0679672 | -1.1911820 | -2.9384415 |
| 22 | C  | -0.0853573 | -1.2243515 | -4.3453113 |
| 23 | H  | -0.1422544 | -2.1845203 | -4.8763759 |
| 24 | C  | -0.0316187 | -0.0067427 | -5.0503830 |
| 25 | H  | -0.0402113 | -0.0079566 | -6.1490459 |
| 26 | C  | 0.0325749  | 1.2124805  | -4.3489252 |
| 27 | C  | 0.0367265  | 1.1824512  | -2.9419109 |
| 28 | C  | -0.1362357 | -2.2977813 | -1.9818574 |
| 29 | N  | -0.0770914 | -1.9625836 | -0.7067234 |
| 30 | C  | -0.1293598 | -3.1293186 | 0.2114851  |
| 31 | C  | -0.6931456 | -4.3360190 | -0.6044438 |
| 32 | S  | -0.3372210 | -3.9884217 | -2.3909488 |
| 33 | C  | 0.1167047  | 2.2913255  | -1.9887845 |
| 34 | N  | 0.0715153  | 1.9593278  | -0.7123059 |
| 35 | C  | 0.1348557  | 3.1281645  | 0.2025784  |
| 36 | C  | 0.6889526  | 4.3332138  | -0.6226456 |
| 37 | S  | 0.3149910  | 3.9805954  | -2.4044234 |
| 38 | H  | -2.1604060 | -0.0699957 | 4.1906242  |
| 39 | H  | 0.0800454  | 2.1714904  | -4.8829993 |

|    |   |            |            |            |
|----|---|------------|------------|------------|
| 40 | H | -0.2151472 | -5.2920218 | -0.3247650 |
| 41 | H | -1.7907095 | -4.4362181 | -0.5022307 |
| 42 | H | 0.2129186  | 5.2895054  | -0.3405697 |
| 43 | H | 1.7873937  | 4.4348959  | -0.5320479 |
| 44 | H | 0.8700768  | 2.8837343  | 0.9951076  |
| 45 | H | -0.8551909 | -2.8832806 | 1.0121160  |
| 46 | C | 1.2167273  | -3.4234272 | 0.8757905  |
| 47 | C | 3.6477671  | -4.1332997 | 2.1368239  |
| 48 | C | 2.3938627  | -3.6003742 | 0.1137622  |
| 49 | C | 1.2754942  | -3.6003319 | 2.2753531  |
| 50 | C | 2.4824700  | -3.9575932 | 2.9031569  |
| 51 | C | 3.6003522  | -3.9526433 | 0.7416971  |
| 52 | H | 2.3701204  | -3.4850610 | -0.9798472 |
| 53 | H | 0.3640449  | -3.4723194 | 2.8807335  |
| 54 | H | 2.5084090  | -4.1117160 | 3.9918222  |
| 55 | H | 4.5055979  | -4.1039730 | 0.1358136  |
| 56 | H | 4.5894026  | -4.4268808 | 2.6231845  |
| 57 | C | -1.2033842 | 3.4238585  | 0.8817911  |
| 58 | C | -3.6194121 | 4.1377333  | 2.1695103  |
| 59 | C | -1.2472738 | 3.5980987  | 2.2822336  |
| 60 | C | -2.3880245 | 3.6051725  | 0.1324887  |
| 61 | C | -3.5869556 | 3.9594340  | 0.7736287  |
| 62 | C | -2.4466656 | 3.9574625  | 2.9232822  |
| 63 | H | -0.3300488 | 3.4662965  | 2.8779987  |
| 64 | H | -2.3762085 | 3.4919826  | -0.9615572 |
| 65 | H | -4.4980324 | 4.1141521  | 0.1774134  |
| 66 | H | -2.4607501 | 4.1096778  | 4.0124304  |
| 67 | H | -4.5551210 | 4.4329828  | 2.6661764  |
| 68 | H | 6.4145990  | 0.0665236  | 0.6071861  |
| 69 | C | 5.6090147  | 0.0484240  | -0.1389690 |
| 70 | C | 3.4929272  | -0.0014638 | -2.1068552 |
| 71 | H | 2.7018435  | -0.0202728 | -2.8648905 |
| 72 | H | 6.9284579  | 0.0279419  | -1.8499168 |
| 73 | C | 5.8834142  | 0.0258731  | -1.5110041 |
| 74 | C | 4.8414195  | 0.0008795  | -2.4769744 |
| 75 | H | 5.1070224  | -0.0163165 | -3.5433633 |
| 76 | H | -2.7181763 | 0.0207086  | -2.8493088 |
| 77 | C | -3.5049465 | 0.0031591  | -2.0873613 |
| 78 | C | -5.6104797 | -0.0430434 | -0.1081262 |
| 79 | H | -6.4123557 | -0.0600809 | 0.6426346  |
| 80 | C | -5.8921885 | -0.0208373 | -1.4786544 |
| 81 | H | -6.9394295 | -0.0218953 | -1.8121025 |
| 82 | H | -5.1266384 | 0.0194175  | -3.5147994 |
| 83 | C | -4.8554288 | 0.0023551  | -2.4502556 |
| 84 | H | -4.1012257 | -0.0431458 | 2.4027152  |
| 85 | H | 4.1136479  | 0.0480132  | 2.3797585  |

[Fe((R)-L<sup>1</sup>iPr)(bimpy)]<sup>2+</sup> (5<sup>2+</sup>), high-spin

|    |    |            |            |            |
|----|----|------------|------------|------------|
| 1  | Fe | -0.0013707 | -0.0005398 | -0.1201137 |
| 2  | N  | 0.0081155  | 0.0075004  | 2.0612178  |
| 3  | C  | -1.1628740 | -0.1028834 | 2.7354820  |
| 4  | C  | -1.1956828 | -0.1055218 | 4.1463243  |
| 5  | C  | 0.0189398  | 0.0224376  | 4.8419016  |
| 6  | H  | 0.0231935  | 0.0286823  | 5.9409440  |
| 7  | C  | 1.2280695  | 0.1428472  | 4.1355509  |
| 8  | H  | 2.1758376  | 0.2471659  | 4.6809446  |
| 9  | C  | 1.1842992  | 0.1247095  | 2.7250805  |
| 10 | C  | -2.3116190 | -0.1964045 | 1.8288243  |
| 11 | N  | -2.1325199 | -0.1719531 | 0.4961565  |
| 12 | C  | -3.3977267 | -0.2553072 | -0.0685987 |
| 13 | C  | -4.3715648 | -0.3309251 | 0.9775116  |
| 14 | N  | -3.6388877 | -0.2920515 | 2.1581973  |

|    |   |            |            |            |
|----|---|------------|------------|------------|
| 15 | C | 2.3256617  | 0.2120903  | 1.8086226  |
| 16 | N | 2.1359207  | 0.1795650  | 0.4775945  |
| 17 | C | 3.3970190  | 0.2514630  | -0.0978647 |
| 18 | C | 4.3791417  | 0.3343688  | 0.9399191  |
| 19 | N | 3.6555530  | 0.3100206  | 2.1266384  |
| 20 | N | -0.0083437 | 0.0008752  | -2.2529873 |
| 21 | C | -0.0885420 | -1.1665520 | -2.9350303 |
| 22 | C | -0.1030570 | -1.2133117 | -4.3407693 |
| 23 | H | -0.1751083 | -2.1785203 | -4.8598281 |
| 24 | C | -0.0182480 | 0.0013583  | -5.0479199 |
| 25 | H | -0.0221236 | 0.0015410  | -6.1468939 |
| 26 | C | 0.0714145  | 1.2157716  | -4.3409796 |
| 27 | C | 0.0669821  | 1.1685783  | -2.9351689 |
| 28 | C | -0.1547651 | -2.3239768 | -2.0237774 |
| 29 | N | -0.0729449 | -2.1641080 | -0.7321259 |
| 30 | C | -0.1827231 | -3.5121964 | -0.1161659 |
| 31 | C | -0.3787014 | -4.4510720 | -1.3525171 |
| 32 | O | -0.3187263 | -3.5510547 | -2.5137705 |
| 33 | C | 0.1387969  | 2.3255765  | -2.0238760 |
| 34 | N | 0.0651412  | 2.1647749  | -0.7318719 |
| 35 | C | 0.1797880  | 3.5118379  | -0.1148196 |
| 36 | C | 0.3633682  | 4.4526954  | -1.3514895 |
| 37 | O | 0.2995383  | 3.5532022  | -2.5133809 |
| 38 | H | -2.1391781 | -0.2028907 | 4.7003547  |
| 39 | H | 0.1394529  | 2.1811510  | -4.8602699 |
| 40 | H | 0.4213855  | -5.2035698 | -1.4804163 |
| 41 | H | -1.3605892 | -4.9583212 | -1.3814631 |
| 42 | H | -0.4410902 | 5.2014543  | -1.4738790 |
| 43 | H | 1.3425591  | 4.9646415  | -1.3868313 |
| 44 | H | 1.1021806  | 3.5165157  | 0.5044878  |
| 45 | H | 6.5069130  | 0.4615647  | 1.4751045  |
| 46 | C | 5.7583847  | 0.4111506  | 0.6726585  |
| 47 | C | 3.7986281  | 0.2490025  | -1.4522737 |
| 48 | H | 3.0588564  | 0.1836460  | -2.2605868 |
| 49 | H | 7.1985145  | 0.4568789  | -0.9364483 |
| 50 | C | 6.1318470  | 0.4052067  | -0.6764020 |
| 51 | C | 5.1687787  | 0.3269757  | -1.7205318 |
| 52 | H | 5.5171174  | 0.3248230  | -2.7629946 |
| 53 | H | -3.0754724 | -0.2187709 | -2.2345411 |
| 54 | C | -3.8093967 | -0.2703902 | -1.4198815 |
| 55 | C | -5.7522452 | -0.4195673 | 0.7215720  |
| 56 | H | -6.4941524 | -0.4747851 | 1.5298193  |
| 57 | C | -6.1358757 | -0.4293713 | -0.6246339 |
| 58 | H | -7.2037716 | -0.4947776 | -0.8764171 |
| 59 | H | -5.5377000 | -0.3667561 | -2.7165036 |
| 60 | C | -5.1812020 | -0.3565608 | -1.6768624 |
| 61 | H | -4.0302033 | -0.3213913 | 3.1002908  |
| 62 | H | 4.0542131  | 0.3467182  | 3.0653826  |
| 63 | C | -1.0062598 | 3.8627548  | 0.8258804  |
| 64 | H | -1.0101886 | 3.0576537  | 1.5936437  |
| 65 | H | -1.0976750 | -3.5183632 | 0.5135857  |
| 66 | C | 1.0128532  | -3.8657651 | 0.8115426  |
| 67 | H | 1.0236696  | -3.0635464 | 1.5821916  |
| 68 | C | 2.3760322  | -3.8547482 | 0.0993966  |
| 69 | H | 3.1882439  | -4.0246194 | 0.8326936  |
| 70 | H | 2.5775290  | -2.8896181 | -0.4052171 |
| 71 | H | 2.4619002  | -4.6629047 | -0.6554589 |
| 72 | C | 0.7523877  | -5.2003805 | 1.5359586  |
| 73 | H | 1.5579435  | -5.4067339 | 2.2663953  |
| 74 | H | 0.7302148  | -6.0581239 | 0.8329954  |
| 75 | H | -0.2086507 | -5.1914408 | 2.0881250  |
| 76 | C | -0.7377808 | 5.1943368  | 1.5531643  |

|    |   |            |           |            |
|----|---|------------|-----------|------------|
| 77 | H | 0.2300664  | 5.1828772 | 2.0932766  |
| 78 | H | -1.5340807 | 5.3972963 | 2.2946277  |
| 79 | H | -0.7241660 | 6.0554253 | 0.8541077  |
| 80 | C | -2.3766115 | 3.8545400 | 0.1271978  |
| 81 | H | -2.4702995 | 4.6652683 | -0.6240015 |
| 82 | H | -3.1813175 | 4.0215364 | 0.8693364  |
| 83 | H | -2.5830160 | 2.8912956 | -0.3791359 |

[Fe(*R*)-*L*<sup>1</sup>*iPr*)(bimpy)]<sup>2+</sup> (**5**<sup>2+</sup>), low-spin

|    |    |            |            |            |
|----|----|------------|------------|------------|
| 1  | Fe | -0.0006365 | 0.0011677  | -0.0939862 |
| 2  | N  | 0.0063784  | 0.0030681  | 1.8305391  |
| 3  | C  | -1.1759383 | -0.0542524 | 2.5166006  |
| 4  | C  | -1.2026438 | -0.0571430 | 3.9249483  |
| 5  | C  | 0.0165774  | 0.0094225  | 4.6228358  |
| 6  | H  | 0.0206015  | 0.0117453  | 5.7214507  |
| 7  | C  | 1.2306538  | 0.0732250  | 3.9157747  |
| 8  | H  | 2.1853787  | 0.1273783  | 4.4561182  |
| 9  | C  | 1.1936318  | 0.0641640  | 2.5076345  |
| 10 | C  | -2.2770211 | -0.0914738 | 1.5718979  |
| 11 | N  | -1.9798515 | -0.0457377 | 0.2537126  |
| 12 | C  | -3.1948965 | -0.0899867 | -0.4264534 |
| 13 | C  | -4.2509146 | -0.1624143 | 0.5394315  |
| 14 | N  | -3.6272362 | -0.1599185 | 1.7809686  |
| 15 | C  | 2.2876838  | 0.0983404  | 1.5546386  |
| 16 | N  | 1.9810982  | 0.0473179  | 0.2387601  |
| 17 | C  | 3.1913851  | 0.0865633  | -0.4501813 |
| 18 | C  | 4.2542572  | 0.1618012  | 0.5079779  |
| 19 | N  | 3.6394001  | 0.1660292  | 1.7538335  |
| 20 | N  | -0.0098987 | 0.0010804  | -2.0053850 |
| 21 | C  | -0.0719749 | -1.1781800 | -2.6875171 |
| 22 | C  | -0.0885596 | -1.2177879 | -4.0924849 |
| 23 | H  | -0.1483076 | -2.1829195 | -4.6130639 |
| 24 | C  | -0.0261126 | 0.0011865  | -4.7969075 |
| 25 | H  | -0.0324825 | 0.0012313  | -5.8956844 |
| 26 | C  | 0.0443300  | 1.2201149  | -4.0931898 |
| 27 | C  | 0.0441589  | 1.1803898  | -2.6881332 |
| 28 | C  | -0.1303484 | -2.2751538 | -1.7233839 |
| 29 | N  | -0.0421190 | -1.9768714 | -0.4481158 |
| 30 | C  | -0.0944107 | -3.2575358 | 0.3089539  |
| 31 | C  | -0.4882898 | -4.2796480 | -0.8039779 |
| 32 | O  | -0.2963829 | -3.5476853 | -2.0681727 |
| 33 | C  | 0.1133396  | 2.2773883  | -1.7247585 |
| 34 | N  | 0.0381789  | 1.9793831  | -0.4486348 |
| 35 | C  | 0.1003941  | 3.2599908  | 0.3078409  |
| 36 | C  | 0.4806021  | 4.2824054  | -0.8097336 |
| 37 | O  | 0.2764506  | 3.5497248  | -2.0715630 |
| 38 | H  | -2.1533991 | -0.1083855 | 4.4725489  |
| 39 | H  | 0.0976630  | 2.1853156  | -4.6143299 |
| 40 | H  | 0.1546685  | -5.1765683 | -0.8406205 |
| 41 | H  | -1.5499127 | -4.5906465 | -0.7681222 |
| 42 | H  | -0.1643763 | 5.1781533  | -0.8398001 |
| 43 | H  | 1.5419074  | 4.5955628  | -0.7853886 |
| 44 | H  | 0.9165465  | 3.1844389  | 1.0552602  |
| 45 | H  | -0.9011758 | -3.1827078 | 1.0665014  |
| 46 | H  | 6.4144317  | 0.2653529  | 0.8815900  |
| 47 | C  | 5.6094209  | 0.2112669  | 0.1359470  |
| 48 | C  | 3.4961623  | 0.0564617  | -1.8303780 |
| 49 | H  | 2.7068412  | -0.0043758 | -2.5880597 |
| 50 | H  | 6.9288065  | 0.2178080  | -1.5752664 |
| 51 | C  | 5.8841285  | 0.1818129  | -1.2358653 |
| 52 | C  | 4.8437068  | 0.1051496  | -2.2009914 |
| 53 | H  | 5.1099199  | 0.0826056  | -3.2671180 |

|    |   |            |            |            |
|----|---|------------|------------|------------|
| 54 | H | -2.7246331 | -0.0122004 | -2.5678210 |
| 55 | C | -3.5088680 | -0.0708788 | -1.8047125 |
| 56 | C | -5.6085005 | -0.2167730 | 0.1767763  |
| 57 | H | -6.4084186 | -0.2690263 | 0.9279899  |
| 58 | C | -5.8923650 | -0.1980429 | -1.1933599 |
| 59 | H | -6.9391493 | -0.2388383 | -1.5256624 |
| 60 | H | -5.1316594 | -0.1196851 | -3.2306545 |
| 61 | C | -4.8586644 | -0.1264561 | -2.1660277 |
| 62 | H | -4.0966554 | -0.2047610 | 2.6857085  |
| 63 | H | 4.1154798  | 0.2141054  | 2.6549178  |
| 64 | C | -1.2192780 | 3.5823966  | 1.0694444  |
| 65 | H | -1.4123085 | 2.6913281  | 1.7042859  |
| 66 | C | 1.2347872  | -3.5798718 | 1.0540267  |
| 67 | H | 1.4370391  | -2.6878034 | 1.6847948  |
| 68 | C | -1.0095901 | 4.7867348  | 2.0068756  |
| 69 | H | -0.1783419 | 4.6137973  | 2.7192503  |
| 70 | H | -1.9241263 | 4.9835356  | 2.5986836  |
| 71 | H | -0.7842152 | 5.7161085  | 1.4452981  |
| 72 | C | -2.4317430 | 3.7766247  | 0.1417746  |
| 73 | H | -2.3317277 | 4.6806290  | -0.4920317 |
| 74 | H | -3.3531044 | 3.9142810  | 0.7402470  |
| 75 | H | -2.5958534 | 2.9075522  | -0.5245992 |
| 76 | C | 2.4346485  | -3.7778578 | 0.1109416  |
| 77 | H | 3.3626733  | -3.9216287 | 0.6975564  |
| 78 | H | 2.5952494  | -2.9082661 | -0.5555985 |
| 79 | H | 2.3216637  | -4.6797502 | -0.5237066 |
| 80 | C | 1.0350569  | -4.7826681 | 1.9956042  |
| 81 | H | 1.9579422  | -4.9828558 | 2.5731030  |
| 82 | H | 0.7973528  | -5.7113551 | 1.4379530  |
| 83 | H | 0.2154948  | -4.6060284 | 2.7204443  |

**[Fe(*R*)-*L*<sup>2</sup>*i*Pr)(bimpy)]<sup>2+</sup> (6<sup>2+</sup>), high-spin**

|    |    |            |            |            |
|----|----|------------|------------|------------|
| 1  | Fe | -0.0036018 | 0.0009486  | -0.1669874 |
| 2  | N  | -0.0127289 | 0.0116144  | 2.0229534  |
| 3  | C  | 0.0530797  | -1.1621684 | 2.6987914  |
| 4  | C  | 0.0515619  | -1.1945880 | 4.1095431  |
| 5  | C  | -0.0325286 | 0.0240418  | 4.8047581  |
| 6  | H  | -0.0408548 | 0.0289055  | 5.9037776  |
| 7  | C  | -0.1056609 | 1.2364023  | 4.0975978  |
| 8  | H  | -0.1759484 | 2.1876984  | 4.6422363  |
| 9  | C  | -0.0864509 | 1.1914359  | 2.6872326  |
| 10 | C  | 0.1091909  | -2.3142924 | 1.7938262  |
| 11 | N  | 0.1053744  | -2.1332472 | 0.4611586  |
| 12 | C  | 0.1411181  | -3.3999057 | -0.1047341 |
| 13 | C  | 0.1702679  | -4.3770217 | 0.9405894  |
| 14 | N  | 0.1510745  | -3.6446915 | 2.1221055  |
| 15 | C  | -0.1254659 | 2.3357029  | 1.7715165  |
| 16 | N  | -0.1068478 | 2.1432671  | 0.4405587  |
| 17 | C  | -0.1240876 | 3.4055731  | -0.1361116 |
| 18 | C  | -0.1558668 | 4.3916653  | 0.9007790  |
| 19 | N  | -0.1590290 | 3.6691448  | 2.0883527  |
| 20 | N  | -0.0084722 | -0.0008303 | -2.2764009 |
| 21 | C  | 1.1571755  | -0.1465381 | -2.9561376 |
| 22 | C  | 1.1920726  | -0.1634942 | -4.3634891 |
| 23 | H  | 2.1445345  | -0.2912622 | -4.8968861 |
| 24 | C  | -0.0136022 | -0.0048366 | -5.0697366 |
| 25 | H  | -0.0156433 | -0.0061580 | -6.1685500 |
| 26 | C  | -1.2167470 | 0.1550103  | -4.3594483 |
| 27 | C  | -1.1767268 | 0.1415918  | -2.9521798 |
| 28 | C  | 2.3271729  | -0.2686980 | -2.0590790 |
| 29 | N  | 2.1497046  | -0.1399803 | -0.7700991 |
| 30 | C  | 3.4025965  | -0.2030966 | 0.0108193  |

|    |   |            |            |            |
|----|---|------------|------------|------------|
| 31 | C | 4.5468980  | -0.7301266 | -0.9167064 |
| 32 | S | 3.9421261  | -0.5892375 | -2.6591830 |
| 33 | C | -2.3440113 | 0.2625203  | -2.0513969 |
| 34 | N | -2.1626851 | 0.1338672  | -0.7630296 |
| 35 | C | -3.4140212 | 0.1922934  | 0.0209589  |
| 36 | C | -4.5636677 | 0.7124805  | -0.9040334 |
| 37 | S | -3.9615408 | 0.5776180  | -2.6476088 |
| 38 | H | 0.1138859  | -2.1408441 | 4.6638696  |
| 39 | H | -2.1712874 | 0.2804530  | -4.8896765 |
| 40 | H | 5.4776352  | -0.1400282 | -0.8289636 |
| 41 | H | 4.7904581  | -1.7932145 | -0.7334292 |
| 42 | H | -5.4899757 | 0.1156000  | -0.8150409 |
| 43 | H | -4.8145044 | 1.7735572  | -0.7189032 |
| 44 | H | -3.2563556 | 0.9362105  | 0.8301583  |
| 45 | H | 3.2427657  | -0.9452707 | 0.8212094  |
| 46 | H | -0.1853775 | 6.5244328  | 1.4324715  |
| 47 | C | -0.1708891 | 5.7727089  | 0.6315571  |
| 48 | C | -0.1109092 | 3.8042177  | -1.4912702 |
| 49 | H | -0.0847183 | 3.0602963  | -2.2978491 |
| 50 | H | -0.1598850 | 7.2105192  | -0.9804408 |
| 51 | C | -0.1555039 | 6.1431169  | -0.7182186 |
| 52 | C | -0.1275080 | 5.1759852  | -1.7612415 |
| 53 | H | -0.1159698 | 5.5225010  | -2.8042370 |
| 54 | H | 0.1359760  | -3.0715981 | -2.2693372 |
| 55 | C | 0.1535156  | -3.8091845 | -1.4566324 |
| 56 | C | 0.2086497  | -5.7597964 | 0.6827804  |
| 57 | H | 0.2287288  | -6.5046580 | 1.4899616  |
| 58 | C | 0.2186055  | -6.1410519 | -0.6640692 |
| 59 | H | 0.2480703  | -7.2102128 | -0.9173626 |
| 60 | H | 0.2084398  | -5.5371941 | -2.7555057 |
| 61 | C | 0.1926696  | -5.1827117 | -1.7152620 |
| 62 | H | 0.1600990  | -4.0379745 | 3.0638169  |
| 63 | H | -0.1738022 | 4.0702087  | 3.0266934  |
| 64 | C | 3.7072180  | 1.1641693  | 0.7032980  |
| 65 | H | 2.7737370  | 1.4151173  | 1.2530975  |
| 66 | C | -3.7106265 | -1.1755821 | 0.7156666  |
| 67 | H | -2.7756316 | -1.4200852 | 1.2656679  |
| 68 | C | -4.8349621 | -1.0236210 | 1.7575224  |
| 69 | H | -4.6117067 | -0.2267026 | 2.4950978  |
| 70 | H | -4.9754220 | -1.9695422 | 2.3154545  |
| 71 | H | -5.8101129 | -0.7835773 | 1.2874315  |
| 72 | C | -3.9900102 | -2.3228789 | -0.2706351 |
| 73 | H | -4.9278504 | -2.1639982 | -0.8402754 |
| 74 | H | -4.1090691 | -3.2770889 | 0.2788123  |
| 75 | H | -3.1664868 | -2.4615921 | -0.9979105 |
| 76 | C | 3.9934962  | 2.3082783  | -0.2847181 |
| 77 | H | 4.1173541  | 3.2627206  | 0.2632544  |
| 78 | H | 3.1712816  | 2.4502747  | -1.0128218 |
| 79 | H | 4.9309242  | 2.1432225  | -0.8532901 |
| 80 | C | 4.8311955  | 1.0070690  | 1.7447497  |
| 81 | H | 4.9780186  | 1.9531031  | 2.3008381  |
| 82 | H | 5.8043019  | 0.7601895  | 1.2739499  |
| 83 | H | 4.6037787  | 0.2128483  | 2.4839743  |

---

[Fe(*R*)-*L*<sup>2</sup>iPr)(bimpy)]<sup>2+</sup> (**6**<sup>2+</sup>), low-spin

|   |    |            |            |            |
|---|----|------------|------------|------------|
| 1 | Fe | -0.0000630 | 0.0010986  | -0.1728377 |
| 2 | N  | 0.0066676  | 0.0028492  | 1.7544654  |
| 3 | C  | -1.1757315 | -0.0574620 | 2.4408252  |
| 4 | C  | -1.2024493 | -0.0620228 | 3.8491213  |
| 5 | C  | 0.0165596  | 0.0080688  | 4.5471952  |
| 6 | H  | 0.0204451  | 0.0101052  | 5.6457890  |
| 7 | C  | 1.2305930  | 0.0756336  | 3.8402692  |

|    |   |            |            |            |
|----|---|------------|------------|------------|
| 8  | H | 2.1849974  | 0.1318189  | 4.3809736  |
| 9  | C | 1.1939007  | 0.0658827  | 2.4321725  |
| 10 | C | -2.2767548 | -0.0895742 | 1.4957344  |
| 11 | N | -1.9795269 | -0.0360491 | 0.1773863  |
| 12 | C | -3.1946735 | -0.0601226 | -0.5030869 |
| 13 | C | -4.2513404 | -0.1305830 | 0.4623838  |
| 14 | N | -3.6276807 | -0.1469924 | 1.7039094  |
| 15 | C | 2.2882097  | 0.0943344  | 1.4791845  |
| 16 | N | 1.9819921  | 0.0367826  | 0.1630321  |
| 17 | C | 3.1926340  | 0.0559923  | -0.5256446 |
| 18 | C | 4.2558696  | 0.1275503  | 0.4325496  |
| 19 | N | 3.6405843  | 0.1498200  | 1.6780994  |
| 20 | N | -0.0083390 | 0.0010242  | -2.0690262 |
| 21 | C | -0.0931064 | -1.1832381 | -2.7441328 |
| 22 | C | -0.1094470 | -1.2149198 | -4.1509264 |
| 23 | H | -0.1881073 | -2.1732830 | -4.6825011 |
| 24 | C | -0.0244362 | 0.0012884  | -4.8550865 |
| 25 | H | -0.0310276 | 0.0014027  | -5.9538021 |
| 26 | C | 0.0688545  | 1.2173457  | -4.1517601 |
| 27 | C | 0.0689751  | 1.1853833  | -2.7448802 |
| 28 | C | -0.1881426 | -2.2904609 | -1.7902632 |
| 29 | N | -0.0884183 | -1.9684931 | -0.5148477 |
| 30 | C | -0.1620525 | -3.1409683 | 0.3916796  |
| 31 | C | -0.8168193 | -4.3027342 | -0.4087587 |
| 32 | S | -0.4968153 | -3.9614002 | -2.2038916 |
| 33 | C | 0.1741100  | 2.2924995  | -1.7919993 |
| 34 | N | 0.0851666  | 1.9708067  | -0.5157086 |
| 35 | C | 0.1655416  | 3.1441117  | 0.3894446  |
| 36 | C | 0.8166910  | 4.3041237  | -0.4161786 |
| 37 | S | 0.4811439  | 3.9629729  | -2.2085434 |
| 38 | H | -2.1529951 | -0.1159146 | 4.3968283  |
| 39 | H | 0.1408228  | 2.1758202  | -4.6840689 |
| 40 | H | -0.3887947 | -5.2902828 | -0.1583091 |
| 41 | H | -1.9141193 | -4.3494279 | -0.2745817 |
| 42 | H | 0.3928025  | 5.2926615  | -0.1626293 |
| 43 | H | 1.9151579  | 4.3482025  | -0.2909273 |
| 44 | H | 0.8473097  | 2.8672688  | 1.2202357  |
| 45 | H | -0.8393692 | -2.8639223 | 1.2260481  |
| 46 | H | 6.4174099  | 0.2013681  | 0.8063195  |
| 47 | C | 5.6117850  | 0.1550789  | 0.0608435  |
| 48 | C | 3.4970203  | 0.0121254  | -1.9054824 |
| 49 | H | 2.7065077  | -0.0435417 | -2.6622637 |
| 50 | H | 6.9314136  | 0.1254396  | -1.6499007 |
| 51 | C | 5.8862092  | 0.1103564  | -1.3105295 |
| 52 | C | 4.8450553  | 0.0411678  | -2.2756175 |
| 53 | H | 5.1114140  | 0.0079398  | -3.3414152 |
| 54 | H | -2.7218660 | 0.0234499  | -2.6430907 |
| 55 | C | -3.5078615 | -0.0248860 | -1.8811334 |
| 56 | C | -5.6094595 | -0.1664437 | 0.0993435  |
| 57 | H | -6.4099638 | -0.2182723 | 0.8499550  |
| 58 | C | -5.8927413 | -0.1291620 | -1.2704448 |
| 59 | H | -6.9399207 | -0.1536786 | -1.6031462 |
| 60 | H | -5.1312872 | -0.0349849 | -3.3068237 |
| 61 | C | -4.8581086 | -0.0604151 | -2.2425391 |
| 62 | H | -4.0979156 | -0.1908304 | 2.6082877  |
| 63 | H | 4.1171232  | 0.1964261  | 2.5790305  |
| 64 | C | 1.2274203  | -3.4829726 | 1.0211992  |
| 65 | H | 1.5949582  | -2.5243913 | 1.4432216  |
| 66 | C | -1.2201501 | 3.4882124  | 1.0262488  |
| 67 | H | -1.5872627 | 2.5301558  | 1.4497679  |
| 68 | C | -2.2713352 | 3.9870295  | 0.0182946  |
| 69 | H | -1.9896670 | 4.9621920  | -0.4258845 |



|    |   |            |            |            |
|----|---|------------|------------|------------|
| 70 | H | -3.2426176 | 4.1361673  | 0.5292963  |
| 71 | H | -2.4412713 | 3.2719207  | -0.8098824 |
| 72 | C | -1.0450308 | 4.4719700  | 2.1996122  |
| 73 | H | -0.3314673 | 4.0935352  | 2.9594025  |
| 74 | H | -2.0144852 | 4.6423451  | 2.7065462  |
| 75 | H | -0.6844570 | 5.4653527  | 1.8639773  |
| 76 | C | 2.2738065  | -3.9794596 | 0.0071568  |
| 77 | H | 3.2476971  | -4.1296124 | 0.5128683  |
| 78 | H | 2.4392831  | -3.2620982 | -0.8199352 |
| 79 | H | 1.9899611  | -4.9535813 | -0.4379420 |
| 80 | C | 1.0598991  | -4.4673283 | 2.1951105  |
| 81 | H | 2.0321119  | -4.6357352 | 2.6973855  |
| 82 | H | 0.6998333  | -5.4613831 | 1.8609178  |
| 83 | H | 0.3491409  | -4.0904533 | 2.9583106  |

[Fe((R)-L<sup>1</sup>Ph)(bpp)]<sup>2+</sup> (7<sup>2+</sup>), high-spin

|    |    |            |            |            |
|----|----|------------|------------|------------|
| 1  | Fe | -0.0002286 | -0.0033862 | -0.6694911 |
| 2  | N  | 0.0109077  | 0.0030036  | 1.4991994  |
| 3  | C  | -1.1502813 | -0.0655934 | 2.1756026  |
| 4  | C  | -1.2008554 | -0.0617794 | 3.5797187  |
| 5  | C  | 0.0237179  | 0.0178586  | 4.2643702  |
| 6  | H  | 0.0287941  | 0.0240035  | 5.3635553  |
| 7  | C  | 1.2418963  | 0.0898313  | 3.5675787  |
| 8  | H  | 2.1932315  | 0.1531107  | 4.1088518  |
| 9  | C  | 1.1782913  | 0.0783559  | 2.1639935  |
| 10 | N  | -2.2906729 | -0.1457264 | 1.3410784  |
| 11 | N  | -2.1136388 | -0.1420660 | -0.0189011 |
| 12 | C  | -3.3454373 | -0.2207121 | -0.5422923 |
| 13 | C  | -4.3344339 | -0.2779163 | 0.4743378  |
| 14 | C  | -3.6259911 | -0.2265144 | 1.6669736  |
| 15 | N  | 2.3108631  | 0.1494048  | 1.3180937  |
| 16 | N  | 2.1210881  | 0.1367128  | -0.0401825 |
| 17 | C  | 3.3482263  | 0.2081063  | -0.5754714 |
| 18 | C  | 4.3468937  | 0.2690496  | 0.4315270  |
| 19 | C  | 3.6494642  | 0.2283978  | 1.6309962  |
| 20 | N  | -0.0084233 | 0.0005831  | -2.7953061 |
| 21 | C  | -0.0593242 | -1.1678145 | -3.4816423 |
| 22 | C  | -0.0696595 | -1.2127322 | -4.8873531 |
| 23 | H  | -0.1147428 | -2.1787051 | -5.4083375 |
| 24 | C  | -0.0187000 | 0.0044283  | -5.5934594 |
| 25 | H  | -0.0227164 | 0.0059472  | -6.6923405 |
| 26 | C  | 0.0373240  | 1.2196342  | -4.8843681 |
| 27 | C  | 0.0373290  | 1.1708540  | -3.4787403 |
| 28 | C  | -0.1016008 | -2.3212404 | -2.5662844 |
| 29 | N  | -0.0453005 | -2.1376644 | -1.2735460 |
| 30 | C  | -0.1449982 | -3.4778470 | -0.6295612 |
| 31 | C  | -0.2061321 | -4.4481547 | -1.8617449 |
| 32 | O  | -0.2154607 | -3.5603256 | -3.0346909 |
| 33 | C  | 0.0855790  | 2.3218053  | -2.5604996 |
| 34 | N  | 0.0374832  | 2.1347491  | -1.2679954 |
| 35 | C  | 0.1379552  | 3.4733468  | -0.6210987 |
| 36 | C  | 0.1975099  | 4.4467554  | -1.8511403 |
| 37 | O  | 0.1958264  | 3.5621682  | -3.0264714 |
| 38 | H  | -2.1470641 | -0.1186715 | 4.1306233  |
| 39 | H  | 0.0783813  | 2.1870811  | -5.4029347 |
| 40 | H  | 0.6816935  | -5.1024567 | -1.9486812 |
| 41 | H  | -1.1230143 | -5.0638221 | -1.9036401 |
| 42 | H  | -0.6871290 | 5.1061068  | -1.9314934 |
| 43 | H  | 1.1175828  | 5.0574925  | -1.8963359 |
| 44 | H  | 1.0965856  | 3.5048683  | -0.0622766 |
| 45 | H  | -1.1031933 | -3.5102740 | -0.0699538 |
| 46 | C  | 0.9857697  | -3.7752883 | 0.3468630  |

|    |   |            |            |            |
|----|---|------------|------------|------------|
| 47 | C | 3.0718522  | -4.4586436 | 2.1288622  |
| 48 | C | 2.3366953  | -3.6378615 | -0.0449003 |
| 49 | C | 0.6938737  | -4.2553241 | 1.6410851  |
| 50 | C | 1.7311867  | -4.5959550 | 2.5279276  |
| 51 | C | 3.3726737  | -3.9767912 | 0.8408517  |
| 52 | H | 2.5860144  | -3.2742314 | -1.0540010 |
| 53 | H | -0.3543099 | -4.3850711 | 1.9534438  |
| 54 | H | 1.4900701  | -4.9852475 | 3.5277377  |
| 55 | H | 4.4203133  | -3.8806980 | 0.5203508  |
| 56 | H | 3.8832613  | -4.7405983 | 2.8154170  |
| 57 | C | -0.9922306 | 3.7684597  | 0.3568543  |
| 58 | C | -3.0772941 | 4.4500296  | 2.1408040  |
| 59 | C | -0.6995766 | 4.2481142  | 1.6510649  |
| 60 | C | -2.3434124 | 3.6306558  | -0.0339300 |
| 61 | C | -3.3788643 | 3.9687751  | 0.8527524  |
| 62 | C | -1.7363786 | 4.5877768  | 2.5388995  |
| 63 | H | 0.3487622  | 4.3783145  | 1.9627199  |
| 64 | H | -2.5934399 | 3.2673161  | -1.0429647 |
| 65 | H | -4.4266941 | 3.8723702  | 0.5329737  |
| 66 | H | -1.4946812 | 4.9768216  | 3.5386714  |
| 67 | H | -3.8883220 | 4.7313266  | 2.8280810  |
| 68 | H | 5.4313712  | 0.3353415  | 0.3012364  |
| 69 | H | 3.4688378  | 0.2164610  | -1.6650415 |
| 70 | H | -3.4759121 | -0.2371280 | -1.6306376 |
| 71 | H | -5.4198597 | -0.3485488 | 0.3546177  |
| 72 | H | -3.9727374 | -0.2401357 | 2.7046219  |
| 73 | H | 4.0054055  | 0.2495070  | 2.6653740  |

[Fe(*R*)-*L*<sup>1</sup>Ph)(bpp)]<sup>2+</sup> (7<sup>2+</sup>), low-spin

|    |    |            |            |            |
|----|----|------------|------------|------------|
| 1  | Fe | -0.0010785 | -0.0004421 | -0.8095780 |
| 2  | N  | 0.0071669  | 0.0000346  | 1.0949697  |
| 3  | C  | -1.1648883 | -0.0312023 | 1.7729054  |
| 4  | C  | -1.2102345 | -0.0340018 | 3.1732092  |
| 5  | C  | 0.0187586  | 0.0022509  | 3.8587341  |
| 6  | H  | 0.0233391  | 0.0032824  | 4.9574760  |
| 7  | C  | 1.2419956  | 0.0372761  | 3.1629038  |
| 8  | H  | 2.1977374  | 0.0652257  | 3.7000022  |
| 9  | C  | 1.1848649  | 0.0321622  | 1.7629804  |
| 10 | N  | -2.2533998 | -0.0591827 | 0.8855373  |
| 11 | N  | -1.9422921 | -0.0435024 | -0.4596815 |
| 12 | C  | -3.1170778 | -0.0653370 | -1.1086076 |
| 13 | C  | -4.1979793 | -0.0950778 | -0.1874520 |
| 14 | C  | -3.6162065 | -0.0866502 | 1.0731281  |
| 15 | N  | 2.2657555  | 0.0591445  | 0.8662737  |
| 16 | N  | 1.9433394  | 0.0428749  | -0.4762748 |
| 17 | C  | 3.1126558  | 0.0644181  | -1.1350413 |
| 18 | C  | 4.2013130  | 0.0946061  | -0.2229714 |
| 19 | C  | 3.6300897  | 0.0866602  | 1.0424492  |
| 20 | N  | -0.0105387 | -0.0004772 | -2.7225580 |
| 21 | C  | -0.0201293 | -1.1809004 | -3.4036616 |
| 22 | C  | -0.0292061 | -1.2212570 | -4.8088192 |
| 23 | H  | -0.0400278 | -2.1877934 | -5.3303002 |
| 24 | C  | -0.0241838 | -0.0005469 | -5.5125972 |
| 25 | H  | -0.0295631 | -0.0005709 | -6.6114183 |
| 26 | C  | -0.0122706 | 1.2201986  | -4.8089507 |
| 27 | C  | -0.0075069 | 1.1799156  | -3.4037695 |
| 28 | C  | -0.0338813 | -2.2823586 | -2.4390749 |
| 29 | N  | -0.0011991 | -1.9814976 | -1.1614352 |
| 30 | C  | -0.0980588 | -3.2621105 | -0.3962464 |
| 31 | C  | -0.1046811 | -4.3333146 | -1.5420534 |
| 32 | O  | -0.1117086 | -3.5587064 | -2.7940013 |
| 33 | C  | 0.0158661  | 2.2814122  | -2.4393874 |

|    |   |            |            |            |
|----|---|------------|------------|------------|
| 34 | N | -0.0047708 | 1.9805956  | -1.1614964 |
| 35 | C | 0.0967684  | 3.2612584  | -0.3970218 |
| 36 | C | 0.0999829  | 4.3323692  | -1.5431834 |
| 37 | O | 0.0901333  | 3.5577353  | -2.7950784 |
| 38 | H | -2.1613836 | -0.0607565 | 3.7184825  |
| 39 | H | -0.0066325 | 2.1867078  | -5.3305623 |
| 40 | H | 0.8014036  | -4.9671581 | -1.5498268 |
| 41 | H | -1.0033045 | -4.9761350 | -1.5443979 |
| 42 | H | -0.8016466 | 4.9724818  | -1.5425236 |
| 43 | H | 1.0030805  | 4.9688753  | -1.5540937 |
| 44 | H | 1.0767153  | 3.2589418  | 0.1238985  |
| 45 | H | -1.0762093 | -3.2602116 | 0.1281531  |
| 46 | C | 0.9993952  | -3.4589164 | 0.6416437  |
| 47 | C | 3.0016714  | -3.9239546 | 2.5870386  |
| 48 | C | 2.3596184  | -3.5427200 | 0.2655801  |
| 49 | C | 0.6583402  | -3.6102517 | 2.0024833  |
| 50 | C | 1.6519427  | -3.8426339 | 2.9704470  |
| 51 | C | 3.3533681  | -3.7702812 | 1.2323955  |
| 52 | H | 2.6555774  | -3.4458156 | -0.7906900 |
| 53 | H | -0.3987051 | -3.5655061 | 2.3081881  |
| 54 | H | 1.3675131  | -3.9823095 | 4.0235220  |
| 55 | H | 4.4060620  | -3.8494722 | 0.9243418  |
| 56 | H | 3.7784020  | -4.1264786 | 3.3386480  |
| 57 | C | -0.9972906 | 3.4587335  | 0.6444415  |
| 58 | C | -2.9939978 | 3.9246125  | 2.5952886  |
| 59 | C | -0.6524105 | 3.6093396  | 2.0043758  |
| 60 | C | -2.3584884 | 3.5436089  | 0.2720878  |
| 61 | C | -3.3494717 | 3.7716556  | 1.2415513  |
| 62 | C | -1.6432897 | 3.8420961  | 2.9750489  |
| 63 | H | 0.4053754  | 3.5635252  | 2.3073345  |
| 64 | H | -2.6573090 | 3.4472511  | -0.7834397 |
| 65 | H | -4.4029297 | 3.8516823  | 0.9363536  |
| 66 | H | -1.3559446 | 3.9811757  | 4.0274106  |
| 67 | H | -3.7685483 | 4.1274383  | 3.3490632  |
| 68 | H | 5.2685484  | 0.1193832  | -0.4627757 |
| 69 | H | 3.1308934  | 0.0590981  | -2.2303631 |
| 70 | H | -5.2671980 | -0.1202534 | -0.4181940 |
| 71 | H | -3.1443839 | -0.0607677 | -2.2037295 |
| 72 | H | -4.0585620 | -0.0989679 | 2.0736885  |
| 73 | H | 4.0809145  | 0.0994922  | 2.0392209  |

**[Fe(*R*)-*L*<sup>2</sup>Ph)(bpp)]<sup>2+</sup> (**8**<sup>2+</sup>), high-spin**

|    |    |            |            |            |
|----|----|------------|------------|------------|
| 1  | Fe | 0.0000005  | 0.0000000  | -0.6791717 |
| 2  | N  | -0.0000003 | 0.0000001  | 1.4862920  |
| 3  | C  | 0.4805845  | 1.0639989  | 2.1550842  |
| 4  | C  | 0.5036548  | 1.1160180  | 3.5594199  |
| 5  | C  | -0.0000016 | 0.0000008  | 4.2498691  |
| 6  | H  | -0.0000024 | 0.0000011  | 5.3491101  |
| 7  | C  | -0.5036573 | -1.1160169 | 3.5594199  |
| 8  | H  | -0.8948746 | -1.9826764 | 4.1050198  |
| 9  | C  | -0.4805855 | -1.0639984 | 2.1550842  |
| 10 | N  | 0.9378945  | 2.1058246  | 1.3143085  |
| 11 | N  | 0.8498970  | 1.9436702  | -0.0450697 |
| 12 | C  | 1.3259930  | 3.0793764  | -0.5737166 |
| 13 | C  | 1.7285292  | 3.9902704  | 0.4382978  |
| 14 | C  | 1.4674008  | 3.3366362  | 1.6340561  |
| 15 | N  | -0.9378948 | -2.1058245 | 1.3143085  |
| 16 | N  | -0.8498955 | -1.9436711 | -0.0450695 |
| 17 | C  | -1.3259910 | -3.0793774 | -0.5737164 |
| 18 | C  | -1.7285286 | -3.9902707 | 0.4382979  |
| 19 | C  | -1.4674013 | -3.3366359 | 1.6340562  |
| 20 | N  | 0.0000001  | 0.0000005  | -2.7831568 |

|    |   |            |            |            |
|----|---|------------|------------|------------|
| 21 | C | -1.0382712 | 0.5528796  | -3.4619401 |
| 22 | C | -1.0709472 | 0.5741384  | -4.8692718 |
| 23 | H | -1.9168223 | 1.0317449  | -5.4015158 |
| 24 | C | -0.0000002 | 0.0000002  | -5.5777699 |
| 25 | H | -0.0000005 | -0.0000002 | -6.6764846 |
| 26 | C | 1.0709469  | -0.5741377 | -4.8692719 |
| 27 | C | 1.0382712  | -0.5528785 | -3.4619402 |
| 28 | C | -2.0613697 | 1.1155199  | -2.5559544 |
| 29 | N | -1.8753190 | 1.0026440  | -1.2639024 |
| 30 | C | -2.9649749 | 1.5861650  | -0.4483043 |
| 31 | C | -3.8952648 | 2.4319205  | -1.3912196 |
| 32 | S | -3.4932157 | 1.9456190  | -3.1295592 |
| 33 | C | 2.0613696  | -1.1155188 | -2.5559544 |
| 34 | N | 1.8753183  | -1.0026432 | -1.2639023 |
| 35 | C | 2.9649747  | -1.5861646 | -0.4483049 |
| 36 | C | 3.8952638  | -2.4319207 | -1.3912202 |
| 37 | S | 3.4932161  | -1.9456173 | -3.1295593 |
| 38 | H | 0.8948715  | 1.9826779  | 4.1050197  |
| 39 | H | 1.9168218  | -1.0317446 | -5.4015159 |
| 40 | H | -4.9675811 | 2.2342208  | -1.2109872 |
| 41 | H | -3.7133906 | 3.5193114  | -1.2986125 |
| 42 | H | 4.9675803  | -2.2342225 | -1.2109872 |
| 43 | H | 3.7133881  | -3.5193113 | -1.2986140 |
| 44 | H | 2.4956408  | -2.2803600 | 0.2784855  |
| 45 | H | -2.4956413 | 2.2803606  | 0.2784858  |
| 46 | C | -3.7221918 | 0.5233089  | 0.3461744  |
| 47 | C | -5.2953766 | -1.3176579 | 1.8092786  |
| 48 | C | -4.3135726 | -0.5862833 | -0.2996723 |
| 49 | C | -3.9216816 | 0.6928754  | 1.7328094  |
| 50 | C | -4.7039154 | -0.2218467 | 2.4614142  |
| 51 | C | -5.0966496 | -1.4982486 | 0.4272919  |
| 52 | H | -4.1830077 | -0.7298802 | -1.3831402 |
| 53 | H | -3.4886267 | 1.5659630  | 2.2460271  |
| 54 | H | -4.8690766 | -0.0648469 | 3.5374232  |
| 55 | H | -5.5678107 | -2.3467734 | -0.0898944 |
| 56 | H | -5.9233716 | -2.0226203 | 2.3729983  |
| 57 | C | 3.7221922  | -0.5233091 | 0.3461738  |
| 58 | C | 5.2953781  | 1.3176569  | 1.8092782  |
| 59 | C | 3.9216815  | -0.6928755 | 1.7328089  |
| 60 | C | 4.3135741  | 0.5862826  | -0.2996728 |
| 61 | C | 5.0966517  | 1.4982475  | 0.4272916  |
| 62 | C | 4.7039157  | 0.2218462  | 2.4614137  |
| 63 | H | 3.4886259  | -1.5659627 | 2.2460266  |
| 64 | H | 4.1830097  | 0.7298794  | -1.3831407 |
| 65 | H | 5.5678138  | 2.3467716  | -0.0898948 |
| 66 | H | 4.8690766  | 0.0648464  | 3.5374228  |
| 67 | H | 5.9233734  | 2.0226190  | 2.3729981  |
| 68 | H | 1.6219495  | 3.6519328  | 2.6701385  |
| 69 | H | -1.6219513 | -3.6519320 | 2.6701385  |
| 70 | H | -1.3627977 | -3.2023037 | -1.6624285 |
| 71 | H | -2.1528855 | -4.9909921 | 0.3126211  |
| 72 | H | 2.1528863  | 4.9909917  | 0.3126209  |
| 73 | H | 1.3628011  | 3.2023023  | -1.6624286 |

**[Fe(*R*)-*L*<sup>2</sup>Ph)(bpp)]<sup>2+</sup> (**8**<sup>2+</sup>), low-spin**

|   |    |            |            |            |
|---|----|------------|------------|------------|
| 1 | Fe | -0.0028520 | -0.0019881 | -0.7076393 |
| 2 | N  | 0.0034798  | -0.0018077 | 1.1978451  |
| 3 | C  | -1.1699540 | -0.0346650 | 1.8750114  |
| 4 | C  | -1.2158980 | -0.0429288 | 3.2762276  |
| 5 | C  | 0.0122836  | -0.0013991 | 3.9635340  |
| 6 | H  | 0.0157547  | -0.0010153 | 5.0622182  |
| 7 | C  | 1.2360960  | 0.0392959  | 3.2684254  |

|    |   |            |            |            |
|----|---|------------|------------|------------|
| 8  | H | 2.1911904  | 0.0705762  | 3.8068362  |
| 9  | C | 1.1812305  | 0.0301236  | 1.8674682  |
| 10 | N | -2.2570870 | -0.0549251 | 0.9872146  |
| 11 | N | -1.9456069 | -0.0215486 | -0.3577471 |
| 12 | C | -3.1200550 | -0.0343769 | -1.0075599 |
| 13 | C | -4.2017396 | -0.0747715 | -0.0872876 |
| 14 | C | -3.6209551 | -0.0864676 | 1.1732035  |
| 15 | N | 2.2626134  | 0.0483842  | 0.9725827  |
| 16 | N | 1.9424504  | 0.0179289  | -0.3704730 |
| 17 | C | 3.1126596  | 0.0345501  | -1.0277359 |
| 18 | C | 4.2001305  | 0.0755768  | -0.1143772 |
| 19 | C | 3.6274923  | 0.0851072  | 1.1498356  |
| 20 | N | -0.0118834 | -0.0038956 | -2.6033348 |
| 21 | C | -0.0697338 | -1.1911414 | -3.2747691 |
| 22 | C | -0.0863160 | -1.2243287 | -4.6817435 |
| 23 | H | -0.1429792 | -2.1839947 | -5.2139576 |
| 24 | C | -0.0304322 | -0.0067794 | -5.3862704 |
| 25 | H | -0.0377806 | -0.0079228 | -6.4850046 |
| 26 | C | 0.0345645  | 1.2122409  | -4.6851105 |
| 27 | C | 0.0366865  | 1.1819272  | -3.2779903 |
| 28 | C | -0.1362491 | -2.3012223 | -2.3172406 |
| 29 | N | -0.0761136 | -1.9718951 | -1.0409995 |
| 30 | C | -0.1303183 | -3.1436650 | -0.1259627 |
| 31 | C | -0.6772078 | -4.3531903 | -0.9508857 |
| 32 | S | -0.3364999 | -3.9873317 | -2.7367035 |
| 33 | C | 0.1145194  | 2.2940627  | -2.3237122 |
| 34 | N | 0.0676572  | 1.9677630  | -1.0461667 |
| 35 | C | 0.1326110  | 3.1416273  | -0.1343701 |
| 36 | C | 0.6702891  | 4.3495249  | -0.9681348 |
| 37 | S | 0.3123623  | 3.9788091  | -2.7494997 |
| 38 | H | -2.1675145 | -0.0742172 | 3.8207864  |
| 39 | H | 0.0833600  | 2.1708182  | -5.2200742 |
| 40 | H | -0.1809452 | -5.3028749 | -0.6814703 |
| 41 | H | -1.7721043 | -4.4756289 | -0.8446610 |
| 42 | H | 0.1758869  | 5.2995551  | -0.6963991 |
| 43 | H | 1.7660460  | 4.4733987  | -0.8730366 |
| 44 | H | 0.8788498  | 2.9051964  | 0.6503420  |
| 45 | H | -0.8677658 | -2.9057468 | 0.6665690  |
| 46 | C | 1.2091916  | -3.4298008 | 0.5534789  |
| 47 | C | 3.6247423  | -4.1491519 | 1.8379640  |
| 48 | C | 2.3885642  | -3.6313342 | -0.1994475 |
| 49 | C | 1.2577768  | -3.5867746 | 1.9559127  |
| 50 | C | 2.4577369  | -3.9479321 | 2.5952187  |
| 51 | C | 3.5873826  | -3.9883406 | 0.4400782  |
| 52 | H | 2.3701252  | -3.5359677 | -1.2953900 |
| 53 | H | 0.3433521  | -3.4453413 | 2.5539718  |
| 54 | H | 2.4765485  | -4.0874831 | 3.6859449  |
| 55 | H | 4.4948303  | -4.1578695 | -0.1575517 |
| 56 | H | 4.5605690  | -4.4448697 | 2.3338150  |
| 57 | C | -1.1992701 | 3.4298964  | 0.5589931  |
| 58 | C | -3.5996992 | 4.1555251  | 1.8684607  |
| 59 | C | -1.2335035 | 3.5852755  | 1.9620203  |
| 60 | C | -2.3855466 | 3.6360839  | -0.1818095 |
| 61 | C | -3.5767127 | 3.9963964  | 0.4700524  |
| 62 | C | -2.4258817 | 3.9494125  | 2.6137511  |
| 63 | H | -0.3136418 | 3.4405145  | 2.5508616  |
| 64 | H | -2.3785623 | 3.5422452  | -1.2780326 |
| 65 | H | -4.4894321 | 4.1697991  | -0.1183768 |
| 66 | H | -2.4332446 | 4.0877571  | 3.7047703  |
| 67 | H | -4.5295380 | 4.4537623  | 2.3739696  |
| 68 | H | -4.0637937 | -0.0982918 | 2.1736515  |
| 69 | H | 4.0762925  | 0.1186305  | 2.1470980  |

|    |   |            |            |            |
|----|---|------------|------------|------------|
| 70 | H | -3.1463488 | -0.0082583 | -2.1023465 |
| 71 | H | -5.2710700 | -0.0770236 | -0.3187224 |
| 72 | H | 5.2674173  | 0.1064250  | -0.3531433 |
| 73 | H | 3.1314938  | 0.0299776  | -2.1229748 |

[Fe((R)-L<sup>1</sup>iPr)(bpp)]<sup>2+</sup> (9<sup>2+</sup>), high-spin

|    |    |            |            |            |
|----|----|------------|------------|------------|
| 1  | Fe | -0.0028224 | 0.0020143  | -0.3595998 |
| 2  | N  | -0.0070229 | -0.0031200 | 1.8186920  |
| 3  | C  | 1.1575291  | 0.0477959  | 2.4929488  |
| 4  | C  | 1.2118205  | 0.0497372  | 3.8972441  |
| 5  | C  | -0.0116567 | -0.0149215 | 4.5861103  |
| 6  | H  | -0.0134536 | -0.0200085 | 5.6853578  |
| 7  | C  | -1.2327994 | -0.0734292 | 3.8926034  |
| 8  | H  | -2.1829915 | -0.1270987 | 4.4372063  |
| 9  | C  | -1.1738239 | -0.0591945 | 2.4885333  |
| 10 | N  | 2.2974567  | 0.0949744  | 1.6550305  |
| 11 | N  | 2.1169308  | 0.0808081  | 0.2947943  |
| 12 | C  | 3.3497835  | 0.1160911  | -0.2319339 |
| 13 | C  | 4.3427162  | 0.1533223  | 0.7822276  |
| 14 | C  | 3.6365851  | 0.1383842  | 1.9769205  |
| 15 | N  | -2.3108201 | -0.0985065 | 1.6463573  |
| 16 | N  | -2.1254816 | -0.0763570 | 0.2867723  |
| 17 | C  | -3.3565465 | -0.1045094 | -0.2444096 |
| 18 | C  | -4.3531637 | -0.1452329 | 0.7660237  |
| 19 | C  | -3.6512654 | -0.1398404 | 1.9632554  |
| 20 | N  | 0.0139692  | 0.0055813  | -2.4833893 |
| 21 | C  | 0.1302715  | 1.1709549  | -3.1648660 |
| 22 | C  | 0.1554611  | 1.2191793  | -4.5703759 |
| 23 | H  | 0.2568902  | 2.1829080  | -5.0875202 |
| 24 | C  | 0.0443829  | 0.0087938  | -5.2806095 |
| 25 | H  | 0.0563755  | 0.0100483  | -6.3794939 |
| 26 | C  | -0.0824200 | -1.2032196 | -4.5757885 |
| 27 | C  | -0.0879629 | -1.1581510 | -3.1699970 |
| 28 | C  | 0.2258994  | 2.3203266  | -2.2482075 |
| 29 | N  | 0.1292890  | 2.1512583  | -0.9566663 |
| 30 | C  | 0.3056164  | 3.4864440  | -0.3239952 |
| 31 | C  | 0.5030091  | 4.4344967  | -1.5526339 |
| 32 | O  | 0.4376623  | 3.5438146  | -2.7221785 |
| 33 | C  | -0.2044062 | -2.3099879 | -2.2589063 |
| 34 | N  | -0.1353661 | -2.1454198 | -0.9650525 |
| 35 | C  | -0.3162455 | -3.4842453 | -0.3414253 |
| 36 | C  | -0.5134737 | -4.4238038 | -1.5766399 |
| 37 | O  | -0.4061328 | -3.5317832 | -2.7416680 |
| 38 | H  | 2.1601047  | 0.0984586  | 4.4456294  |
| 39 | H  | -0.1727106 | -2.1658146 | -5.0970696 |
| 40 | H  | -0.2970905 | 5.1882184  | -1.6739636 |
| 41 | H  | 1.4848499  | 4.9411431  | -1.5804110 |
| 42 | H  | 0.2693689  | -5.1972419 | -1.6850267 |
| 43 | H  | -1.5072006 | -4.9056723 | -1.6234302 |
| 44 | H  | -1.2499256 | -3.4490643 | 0.2598963  |
| 45 | H  | 1.2392030  | 3.4475885  | 0.2776526  |
| 46 | H  | -5.4396814 | -0.1751577 | 0.6388953  |
| 47 | H  | -3.4811066 | -0.0974198 | -1.3336180 |
| 48 | H  | 3.4781372  | 0.1165845  | -1.3207195 |
| 49 | H  | 5.4295646  | 0.1875452  | 0.6590514  |
| 50 | H  | 3.9869377  | 0.1555909  | 3.0134655  |
| 51 | H  | -4.0052695 | -0.1622864 | 2.9984498  |
| 52 | C  | -0.8489704 | 3.8758896  | 0.6406433  |
| 53 | H  | -0.8629298 | 3.0718995  | 1.4103047  |
| 54 | C  | 0.8390395  | -3.8834924 | 0.6188991  |
| 55 | H  | 0.8530798  | -3.0900435 | 1.3993475  |
| 56 | C  | -2.2324644 | 3.9122797  | -0.0299366 |

|    |   |            |            |            |
|----|---|------------|------------|------------|
| 57 | H | -3.0181532 | 4.0937121  | 0.7289946  |
| 58 | H | -2.4743053 | 2.9598183  | -0.5415272 |
| 59 | H | -2.3196058 | 4.7324571  | -0.7716902 |
| 60 | C | -0.5211100 | 5.1985565  | 1.3601148  |
| 61 | H | -1.2949265 | 5.4311088  | 2.1166552  |
| 62 | H | -0.4926511 | 6.0569600  | 0.6579806  |
| 63 | H | 0.4563134  | 5.1563190  | 1.8812298  |
| 64 | C | 2.2205344  | -3.9082373 | -0.0560623 |
| 65 | H | 2.2990375  | -4.7067246 | -0.8222412 |
| 66 | H | 3.0081172  | -4.1155516 | 0.6941681  |
| 67 | H | 2.4650546  | -2.9424538 | -0.5407685 |
| 68 | C | 0.5137110  | -5.2164914 | 1.3198485  |
| 69 | H | -0.4645663 | -5.1839672 | 1.8400569  |
| 70 | H | 1.2869616  | -5.4573118 | 2.0744109  |
| 71 | H | 0.4888591  | -6.0653032 | 0.6060496  |

[Fe((R)-L<sup>1</sup>iPr)(bpp)]<sup>2+</sup> (9<sup>2+</sup>), low-spin

|    |    |            |            |            |
|----|----|------------|------------|------------|
| 1  | Fe | -0.0010475 | 0.0000469  | -0.3777457 |
| 2  | N  | 0.0055196  | 0.0003662  | 1.5237218  |
| 3  | C  | -1.1681849 | 0.0045592  | 2.2032745  |
| 4  | C  | -1.2142780 | 0.0006473  | 3.6041252  |
| 5  | C  | 0.0148738  | -0.0004156 | 4.2917429  |
| 6  | H  | 0.0185662  | -0.0007504 | 5.3905400  |
| 7  | C  | 1.2393666  | -0.0010902 | 3.5958746  |
| 8  | H  | 2.1950237  | -0.0015107 | 4.1346604  |
| 9  | C  | 1.1837962  | -0.0042262 | 2.1953209  |
| 10 | N  | -2.2569792 | 0.0215713  | 1.3155215  |
| 11 | N  | -1.9441578 | 0.0578531  | -0.0300620 |
| 12 | C  | -3.1193365 | 0.0658049  | -0.6788917 |
| 13 | C  | -4.2017626 | 0.0409621  | 0.2414686  |
| 14 | C  | -3.6218706 | 0.0125896  | 1.5022576  |
| 15 | N  | 2.2665356  | -0.0210852 | 1.3001127  |
| 16 | N  | 1.9447207  | -0.0574111 | -0.0433526 |
| 17 | C  | 3.1155817  | -0.0657647 | -0.6999456 |
| 18 | C  | 4.2041544  | -0.0412818 | 0.2131731  |
| 19 | C  | 3.6326432  | -0.0126018 | 1.4777795  |
| 20 | N  | -0.0090724 | -0.0011369 | -2.2942220 |
| 21 | C  | -0.1362014 | -1.1754776 | -2.9728420 |
| 22 | C  | -0.1533759 | -1.2154128 | -4.3781118 |
| 23 | H  | -0.2650928 | -2.1758191 | -4.8991998 |
| 24 | C  | -0.0216254 | -0.0023248 | -5.0825570 |
| 25 | H  | -0.0265528 | -0.0027750 | -6.1814419 |
| 26 | C  | 0.1163916  | 1.2113428  | -4.3804048 |
| 27 | C  | 0.1119336  | 1.1725630  | -2.9750338 |
| 28 | C  | -0.2504342 | -2.2706040 | -2.0068050 |
| 29 | N  | -0.1504699 | -1.9819293 | -0.7301525 |
| 30 | C  | -0.2532666 | -3.2649685 | 0.0221089  |
| 31 | C  | -0.6840006 | -4.2659970 | -1.0963592 |
| 32 | O  | -0.4721735 | -3.5310478 | -2.3573181 |
| 33 | C  | 0.2344886  | 2.2686405  | -2.0111915 |
| 34 | N  | 0.1454286  | 1.9817419  | -0.7333503 |
| 35 | C  | 0.2546001  | 3.2658142  | 0.0164151  |
| 36 | C  | 0.6729479  | 4.2660816  | -1.1077811 |
| 37 | O  | 0.4531696  | 3.5284430  | -2.3656615 |
| 38 | H  | -2.1662429 | 0.0006653  | 4.1494263  |
| 39 | H  | 0.2232991  | 2.1713551  | -4.9032382 |
| 40 | H  | -0.0693248 | -5.1821351 | -1.1403954 |
| 41 | H  | -1.7545208 | -4.5439687 | -1.0609255 |
| 42 | H  | 0.0540128  | 5.1796499  | -1.1491261 |
| 43 | H  | 1.7427903  | 4.5477133  | -1.0814172 |
| 44 | H  | 1.0680748  | 3.1676663  | 0.7639839  |
| 45 | H  | -1.0589481 | -3.1655958 | 0.7778621  |

|    |   |            |            |            |
|----|---|------------|------------|------------|
| 46 | H | 5.2720023  | -0.0447288 | -0.0256435 |
| 47 | H | 3.1356081  | -0.0932459 | -1.7949416 |
| 48 | H | -5.2711817 | 0.0440789  | 0.0098020  |
| 49 | H | -3.1465263 | 0.0932979  | -1.7737236 |
| 50 | H | -4.0665414 | -0.0147725 | 2.5018983  |
| 51 | H | 4.0840465  | 0.0148597  | 2.4744021  |
| 52 | C | 1.0612055  | -3.6437547 | 0.7675893  |
| 53 | H | 1.2894414  | -2.7718365 | 1.4180745  |
| 54 | C | -1.0523956 | 3.6450988  | 0.7748407  |
| 55 | H | -1.2750684 | 2.7734252  | 1.4275895  |
| 56 | C | 0.8163021  | -4.8554369 | 1.6875728  |
| 57 | H | 1.7305447  | -5.0970453 | 2.2626817  |
| 58 | H | 0.5484843  | -5.7652755 | 1.1131921  |
| 59 | H | 0.0021030  | -4.6640375 | 2.4146954  |
| 60 | C | 2.2575607  | -3.8675393 | -0.1737866 |
| 61 | H | 3.1763294  | -4.0576385 | 0.4137212  |
| 62 | H | 2.4525821  | -2.9920012 | -0.8232164 |
| 63 | H | 2.1128099  | -4.7514980 | -0.8263581 |
| 64 | C | -0.7987996 | 4.8570117  | 1.6921980  |
| 65 | H | 0.0224019  | 4.6662780  | 2.4115490  |
| 66 | H | -1.7075554 | 5.0984278  | 2.2760705  |
| 67 | H | -0.5369755 | 5.7668204  | 1.1150306  |
| 68 | C | -2.2575635 | 3.8699460  | -0.1550141 |
| 69 | H | -2.1179149 | 4.7542177  | -0.8086174 |
| 70 | H | -3.1707364 | 4.0601413  | 0.4410943  |
| 71 | H | -2.4591629 | 2.9944596  | -0.8025375 |

[Fe((R)-L<sup>2</sup>iPr)(bpp)]<sup>2+</sup> (10<sup>2+</sup>), high-spin

|    |    |            |            |            |
|----|----|------------|------------|------------|
| 1  | Fe | 0.0030290  | 0.0000404  | -0.4179830 |
| 2  | N  | -0.0028265 | 0.0066003  | 1.7647294  |
| 3  | C  | 0.4690081  | 1.0749336  | 2.4349091  |
| 4  | C  | 0.4817811  | 1.1348756  | 3.8389683  |
| 5  | C  | -0.0145692 | 0.0178290  | 4.5331441  |
| 6  | H  | -0.0194022 | 0.0223958  | 5.6323478  |
| 7  | C  | -0.5049049 | -1.1048952 | 3.8439085  |
| 8  | H  | -0.8875182 | -1.9746156 | 4.3911009  |
| 9  | C  | -0.4802351 | -1.0562518 | 2.4395180  |
| 10 | N  | 0.9446607  | 2.1086232  | 1.5930796  |
| 11 | N  | 0.8688577  | 1.9391707  | 0.2333972  |
| 12 | C  | 1.3872927  | 3.0562228  | -0.2976441 |
| 13 | C  | 1.8089208  | 3.9596858  | 0.7133599  |
| 14 | C  | 1.5120345  | 3.3239095  | 1.9105536  |
| 15 | N  | -0.9488803 | -2.0964293 | 1.6017106  |
| 16 | N  | -0.8625001 | -1.9367756 | 0.2413008  |
| 17 | C  | -1.3757970 | -3.0582500 | -0.2853543 |
| 18 | C  | -1.8049907 | -3.9544847 | 0.7289067  |
| 19 | C  | -1.5177962 | -3.3098000 | 1.9236502  |
| 20 | N  | 0.0068701  | -0.0006845 | -2.5238899 |
| 21 | C  | -0.9879529 | 0.6236993  | -3.2044157 |
| 22 | C  | -1.0125489 | 0.6528746  | -4.6119084 |
| 23 | H  | -1.8214085 | 1.1710277  | -5.1460981 |
| 24 | C  | 0.0152119  | 0.0030843  | -5.3181644 |
| 25 | H  | 0.0186078  | 0.0048276  | -6.4169513 |
| 26 | C  | 1.0386671  | -0.6488126 | -4.6075490 |
| 27 | C  | 1.0055149  | -0.6236355 | -3.2001245 |
| 28 | C  | -1.9883700 | 1.2391525  | -2.3063679 |
| 29 | N  | -1.8547262 | 1.0819355  | -1.0132341 |
| 30 | C  | -2.9509079 | 1.6924118  | -0.2258870 |
| 31 | C  | -3.7769904 | 2.6310479  | -1.1644589 |
| 32 | S  | -3.3348757 | 2.1848587  | -2.9031171 |
| 33 | C  | 2.0003409  | -1.2414900 | -2.2973527 |
| 34 | N  | 1.8609080  | -1.0834481 | -1.0049943 |



|    |   |            |            |            |
|----|---|------------|------------|------------|
| 35 | C | 2.9479908  | -1.7002547 | -0.2106983 |
| 36 | C | 3.7882910  | -2.6300224 | -1.1465489 |
| 37 | S | 3.3464883  | -2.1914275 | -2.8873690 |
| 38 | H | 0.8596342  | 2.0090214  | 4.3824117  |
| 39 | H | 1.8509144  | -1.1650757 | -5.1384160 |
| 40 | H | -4.8689419 | 2.5052867  | -1.0474050 |
| 41 | H | -3.5331775 | 3.7004628  | -1.0226439 |
| 42 | H | 4.8781446  | -2.4876758 | -1.0262677 |
| 43 | H | 3.5593544  | -3.7025568 | -1.0042925 |
| 44 | H | 2.4670411  | -2.3352209 | 0.5632372  |
| 45 | H | -2.4792456 | 2.3213635  | 0.5584764  |
| 46 | H | 1.6620641  | 3.6439206  | 2.9460894  |
| 47 | H | -1.6758764 | -3.6220929 | 2.9603472  |
| 48 | H | -1.4187568 | -3.1821615 | -1.3738361 |
| 49 | H | -2.2627670 | -4.9407606 | 0.6054474  |
| 50 | H | 2.2685605  | 4.9446322  | 0.5862430  |
| 51 | H | 1.4395496  | 3.1716925  | -1.3866408 |
| 52 | C | 3.7798736  | -0.6171754 | 0.5449934  |
| 53 | H | 3.0229863  | -0.0135150 | 1.0930039  |
| 54 | C | -3.7895167 | 0.6024897  | 0.5130593  |
| 55 | H | -3.0364800 | -0.0027880 | 1.0647545  |
| 56 | C | 4.7018326  | -1.2672624 | 1.5943342  |
| 57 | H | 5.4877571  | -1.8946997 | 1.1273886  |
| 58 | H | 4.1390729  | -1.9075302 | 2.3035231  |
| 59 | H | 5.2251507  | -0.4894591 | 2.1833818  |
| 60 | C | 4.5498059  | 0.3321513  | -0.3893121 |
| 61 | H | 5.3545608  | -0.1894582 | -0.9456040 |
| 62 | H | 5.0395604  | 1.1328003  | 0.1984191  |
| 63 | H | 3.8858299  | 0.8188035  | -1.1301973 |
| 64 | C | -4.5482352 | -0.3438463 | -0.4332375 |
| 65 | H | -3.8769411 | -0.8208449 | -1.1736947 |
| 66 | H | -5.3533002 | 0.1767684  | -0.9898223 |
| 67 | H | -5.0365853 | -1.1520732 | 0.1452982  |
| 68 | C | -4.7232037 | 1.2437142  | 1.5574510  |
| 69 | H | -4.1697502 | 1.8821566  | 2.2755911  |
| 70 | H | -5.2490508 | 0.4604320  | 2.1369429  |
| 71 | H | -5.5071390 | 1.8705719  | 1.0865030  |

[Fe(*R*)-L<sup>2</sup>*i*Pr)(bpp)]<sup>2+</sup> (10<sup>2+</sup>), low-spin

|    |    |            |            |            |
|----|----|------------|------------|------------|
| 1  | Fe | -0.0011356 | -0.0008340 | -0.4716884 |
| 2  | N  | 0.0070784  | 0.0008145  | 1.4330715  |
| 3  | C  | -1.1643308 | -0.0562231 | 2.1142299  |
| 4  | C  | -1.2089791 | -0.0619479 | 3.5151555  |
| 5  | C  | 0.0189993  | 0.0033318  | 4.2017195  |
| 6  | H  | 0.0237050  | 0.0044294  | 5.3004796  |
| 7  | C  | 1.2410406  | 0.0671404  | 3.5045146  |
| 8  | H  | 2.1959023  | 0.1183891  | 4.0422969  |
| 9  | C  | 1.1843565  | 0.0587576  | 2.1039888  |
| 10 | N  | -2.2535341 | -0.0897139 | 1.2273674  |
| 11 | N  | -1.9454585 | -0.0263227 | -0.1189726 |
| 12 | C  | -3.1215563 | -0.0457978 | -0.7652131 |
| 13 | C  | -4.2004231 | -0.1190003 | 0.1568155  |
| 14 | C  | -3.6173366 | -0.1419384 | 1.4161476  |
| 15 | N  | 2.2658623  | 0.0907226  | 1.2076533  |
| 16 | N  | 1.9463432  | 0.0252717  | -0.1358892 |
| 17 | C  | 3.1169029  | 0.0443982  | -0.7921271 |
| 18 | C  | 4.2035717  | 0.1193609  | 0.1205686  |
| 19 | C  | 3.6311950  | 0.1435917  | 1.3847856  |
| 20 | N  | -0.0102542 | -0.0019909 | -2.3710829 |
| 21 | C  | -0.1052619 | -1.1855565 | -3.0430139 |
| 22 | C  | -0.1240403 | -1.2181544 | -4.4498056 |
| 23 | H  | -0.2118724 | -2.1755554 | -4.9819192 |

|    |   |            |            |            |
|----|---|------------|------------|------------|
| 24 | C | -0.0259087 | -0.0033898 | -5.1541757 |
| 25 | H | -0.0321355 | -0.0039395 | -6.2529600 |
| 26 | C | 0.0800889  | 1.2120858  | -4.4522024 |
| 27 | C | 0.0771415  | 1.1809544  | -3.0452495 |
| 28 | C | -0.1923352 | -2.2962651 | -2.0877193 |
| 29 | N | -0.0846487 | -1.9799586 | -0.8113828 |
| 30 | C | -0.1306297 | -3.1596662 | 0.0902389  |
| 31 | C | -0.7639193 | -4.3314685 | -0.7142699 |
| 32 | S | -0.4824227 | -3.9656724 | -2.5110270 |
| 33 | C | 0.1743153  | 2.2926204  | -2.0920325 |
| 34 | N | 0.0783717  | 1.9776563  | -0.8143975 |
| 35 | C | 0.1313436  | 3.1587897  | 0.0851494  |
| 36 | C | 0.7603846  | 4.3283506  | -0.7256242 |
| 37 | S | 0.4618253  | 3.9614178  | -2.5194813 |
| 38 | H | -2.1591450 | -0.1122173 | 4.0613093  |
| 39 | H | 0.1615481  | 2.1689520  | -4.9862766 |
| 40 | H | -0.3070731 | -5.3103200 | -0.4815325 |
| 41 | H | -1.8571724 | -4.4109095 | -0.5639799 |
| 42 | H | 0.3076493  | 5.3083905  | -0.4896787 |
| 43 | H | 1.8551382  | 4.4053264  | -0.5851612 |
| 44 | H | 0.8195924  | 2.9029934  | 0.9175939  |
| 45 | H | -0.8139703 | -2.9029717 | 0.9264555  |
| 46 | H | -4.0589098 | -0.1924629 | 2.4162876  |
| 47 | H | 4.0813319  | 0.1963750  | 2.3809917  |
| 48 | H | -3.1517267 | -0.0057297 | -1.8595640 |
| 49 | H | -5.2698297 | -0.1485588 | -0.0730078 |
| 50 | H | 5.2709352  | 0.1497374  | -0.1184813 |
| 51 | H | 3.1378876  | 0.0032378  | -1.8866650 |
| 52 | C | 1.2643391  | -3.4759079 | 0.7208191  |
| 53 | H | 1.6052148  | -2.5172370 | 1.1640793  |
| 54 | C | -1.2596493 | 3.4774272  | 0.7234006  |
| 55 | H | -1.5997829 | 2.5195763  | 1.1689851  |
| 56 | C | -2.3305085 | 3.9257847  | -0.2875326 |
| 57 | H | -2.0715417 | 4.8903448  | -0.7667572 |
| 58 | H | -3.2984929 | 4.0737030  | 0.2295386  |
| 59 | H | -2.4955240 | 3.1781669  | -1.0876974 |
| 60 | C | -1.1043349 | 4.4884086  | 1.8765432  |
| 61 | H | -0.3668693 | 4.1506057  | 2.6325488  |
| 62 | H | -2.0727895 | 4.6313446  | 2.3933013  |
| 63 | H | -0.7856825 | 5.4873782  | 1.5169246  |
| 64 | C | 2.3300178  | -3.9230793 | -0.2960683 |
| 65 | H | 3.3006348  | -4.0719376 | 0.2157886  |
| 66 | H | 2.4911245  | -3.1742401 | -1.0958822 |
| 67 | H | 2.0682876  | -4.8869609 | -0.7751946 |
| 68 | C | 1.1170577  | -4.4865593 | 1.8752762  |
| 69 | H | 2.0883369  | -4.6266317 | 2.3874757  |
| 70 | H | 0.7993735  | -5.4865750 | 1.5177042  |
| 71 | H | 0.3822881  | -4.1501412 | 2.6345076  |

[Fe((*R*)-*L*<sup>1</sup>Ph)(terpy)]<sup>2+</sup> (**11**<sup>2+</sup>), high-spin

|    |    |            |            |            |
|----|----|------------|------------|------------|
| 1  | Fe | 0.0000001  | -0.0000004 | -0.5273675 |
| 2  | N  | -0.0000005 | 0.0000008  | 1.6002067  |
| 3  | C  | 0.6792125  | 0.9693364  | 2.2599025  |
| 4  | C  | 0.6950490  | 0.9974074  | 3.6696485  |
| 5  | C  | -0.0000012 | 0.0000022  | 4.3714899  |
| 6  | H  | -0.0000017 | 0.0000028  | 5.4707103  |
| 7  | C  | -0.6950509 | -0.9974039 | 3.6696492  |
| 8  | H  | -1.2386644 | -1.7762143 | 4.2183950  |
| 9  | C  | -0.6792137 | -0.9693342 | 2.2599031  |
| 10 | C  | 1.3816870  | 1.9546423  | 1.3864673  |
| 11 | N  | 1.2556643  | 1.7471848  | 0.0450092  |
| 12 | C  | 1.8730293  | 2.5808931  | -0.8141132 |

|    |   |            |            |            |
|----|---|------------|------------|------------|
| 13 | C | 2.1375168  | 3.0343229  | 1.8871336  |
| 14 | C | -1.3816876 | -1.9546413 | 1.3864686  |
| 15 | N | -1.2556640 | -1.7471853 | 0.0450103  |
| 16 | C | -1.8730282 | -2.5808947 | -0.8141115 |
| 17 | C | -2.1375174 | -3.0343215 | 1.8871357  |
| 18 | N | 0.0000002  | 0.0000004  | -2.6610204 |
| 19 | C | -0.8724577 | 0.7808333  | -3.3465937 |
| 20 | C | -0.9016384 | 0.8179821  | -4.7521889 |
| 21 | H | -1.6179639 | 1.4690873  | -5.2712894 |
| 22 | C | 0.0000012  | 0.0000024  | -5.4604493 |
| 23 | H | 0.0000016  | 0.0000033  | -6.5592787 |
| 24 | C | 0.9016402  | -0.8179785 | -4.7521894 |
| 25 | C | 0.8724583  | -0.7808317 | -3.3465943 |
| 26 | C | -1.7495445 | 1.5320452  | -2.4316469 |
| 27 | N | -1.6417139 | 1.3755356  | -1.1389696 |
| 28 | C | -2.6998026 | 2.2112675  | -0.5016136 |
| 29 | C | -3.3231797 | 2.9664815  | -1.7271480 |
| 30 | O | -2.6662395 | 2.3748591  | -2.9021423 |
| 31 | C | 1.7495449  | -1.5320447 | -2.4316480 |
| 32 | N | 1.6417140  | -1.3755365 | -1.1389705 |
| 33 | C | 2.6998026  | -2.2112688 | -0.5016149 |
| 34 | C | 3.3231797  | -2.9664820 | -1.7271498 |
| 35 | O | 2.6662399  | -2.3748582 | -2.9021438 |
| 36 | H | 1.2386624  | 1.7762183  | 4.2183939  |
| 37 | H | 1.6179660  | -1.4690830 | -5.2712905 |
| 38 | H | -4.4113941 | 2.8073081  | -1.8371677 |
| 39 | H | -3.1055543 | 4.0510814  | -1.7394688 |
| 40 | H | 4.4113942  | -2.8073090 | -1.8371692 |
| 41 | H | 3.1055538  | -4.0510818 | -1.7394718 |
| 42 | H | 2.2073256  | -2.9277854 | 0.1858467  |
| 43 | H | -2.2073256 | 2.9277835  | 0.1858486  |
| 44 | C | -3.6969693 | 1.3845062  | 0.3037573  |
| 45 | C | -5.6231568 | -0.0647150 | 1.7814855  |
| 46 | C | -4.4348958 | 0.3452236  | -0.3063401 |
| 47 | C | -3.9336119 | 1.6852723  | 1.6613258  |
| 48 | C | -4.8919628 | 0.9650076  | 2.3975297  |
| 49 | C | -5.3927928 | -0.3734004 | 0.4275585  |
| 50 | H | -4.2768925 | 0.0991392  | -1.3681297 |
| 51 | H | -3.3747997 | 2.5025742  | 2.1440381  |
| 52 | H | -5.0793089 | 1.2213288  | 3.4503797  |
| 53 | H | -5.9749448 | -1.1680182 | -0.0615970 |
| 54 | H | -6.3844204 | -0.6178229 | 2.3505101  |
| 55 | C | 3.6969692  | -1.3845079 | 0.3037565  |
| 56 | C | 5.6231563  | 0.0647127  | 1.7814857  |
| 57 | C | 3.9336115  | -1.6852744 | 1.6613250  |
| 58 | C | 4.4348958  | -0.3452252 | -0.3063404 |
| 59 | C | 5.3927926  | 0.3733985  | 0.4275588  |
| 60 | C | 4.8919621  | -0.9650101 | 2.3975293  |
| 61 | H | 3.3747990  | -2.5025765 | 2.1440369  |
| 62 | H | 4.2768928  | -0.0991405 | -1.3681300 |
| 63 | H | 5.9749446  | 1.1680166  | -0.0615963 |
| 64 | H | 5.0793081  | -1.2213317 | 3.4503793  |
| 65 | H | 6.3844198  | 0.6178203  | 2.3505107  |
| 66 | H | -1.7453022 | -2.3622706 | -1.8854443 |
| 67 | H | 1.7453038  | 2.3622678  | -1.8854458 |
| 68 | H | 2.2356563  | 3.1998630  | 2.9672732  |
| 69 | H | -2.2356576 | -3.1998603 | 2.9672754  |
| 70 | C | 2.7700874  | 3.9062222  | 0.9878703  |
| 71 | H | 3.3592527  | 4.7553563  | 1.3627176  |
| 72 | H | 3.1214396  | 4.3334644  | -1.1290618 |
| 73 | C | 2.6405964  | 3.6768649  | -0.3910814 |
| 74 | C | -2.7700871 | -3.9062221 | 0.9878730  |

|    |   |            |            |            |
|----|---|------------|------------|------------|
| 75 | H | -3.3592523 | -4.7553558 | 1.3627208  |
| 76 | H | -3.1214377 | -4.3334668 | -1.1290588 |
| 77 | C | -2.6405952 | -3.6768664 | -0.3910789 |

**[Fe(*R*)-*L*<sup>1</sup>Ph)(terpy)]<sup>2+</sup> (**11**<sup>2+</sup>), low-spin**

|    |    |            |            |            |
|----|----|------------|------------|------------|
| 1  | Fe | -0.0000001 | -0.0000003 | -0.6390389 |
| 2  | N  | -0.0000002 | 0.0000000  | 1.2529053  |
| 3  | C  | 0.7078237  | 0.9564512  | 1.9198275  |
| 4  | C  | 0.7210322  | 0.9798531  | 3.3266421  |
| 5  | C  | -0.0000010 | 0.0000007  | 4.0302919  |
| 6  | H  | -0.0000015 | 0.0000013  | 5.1290110  |
| 7  | C  | -0.7210335 | -0.9798522 | 3.3266423  |
| 8  | H  | -1.2889879 | -1.7473828 | 3.8678247  |
| 9  | C  | -0.7078243 | -0.9564510 | 1.9198276  |
| 10 | C  | 1.3952611  | 1.8746670  | 0.9975507  |
| 11 | N  | 1.2045524  | 1.5620193  | -0.3291140 |
| 12 | C  | 1.7886832  | 2.3389305  | -1.2702378 |
| 13 | C  | 2.1703006  | 2.9830376  | 1.3849145  |
| 14 | C  | -1.3952613 | -1.8746673 | 0.9975509  |
| 15 | N  | -1.2045524 | -1.5620197 | -0.3291139 |
| 16 | C  | -1.7886831 | -2.3389312 | -1.2702375 |
| 17 | C  | -2.1703005 | -2.9830379 | 1.3849148  |
| 18 | N  | 0.0000000  | 0.0000000  | -2.5546409 |
| 19 | C  | -0.8928873 | 0.7739906  | -3.2369871 |
| 20 | C  | -0.9197884 | 0.8034555  | -4.6424517 |
| 21 | H  | -1.6464454 | 1.4398145  | -5.1653265 |
| 22 | C  | 0.0000009  | 0.0000011  | -5.3463460 |
| 23 | H  | 0.0000014  | 0.0000017  | -6.4450926 |
| 24 | C  | 0.9197895  | -0.8034541 | -4.6424517 |
| 25 | C  | 0.8928876  | -0.7739903 | -3.2369872 |
| 26 | C  | -1.7238943 | 1.4914349  | -2.2687958 |
| 27 | N  | -1.5104640 | 1.2612634  | -0.9929328 |
| 28 | C  | -2.4931153 | 2.0739386  | -0.2162945 |
| 29 | C  | -3.1803638 | 2.9197741  | -1.3454850 |
| 30 | O  | -2.6634569 | 2.3658094  | -2.6090138 |
| 31 | C  | 1.7238944  | -1.4914348 | -2.2687958 |
| 32 | N  | 1.5104639  | -1.2612638 | -0.9929329 |
| 33 | C  | 2.4931151  | -2.0739390 | -0.2162947 |
| 34 | C  | 3.1803635  | -2.9197745 | -1.3454852 |
| 35 | O  | 2.6634572  | -2.3658091 | -2.6090140 |
| 36 | H  | 1.2889861  | 1.7473841  | 3.8678246  |
| 37 | H  | 1.6464470  | -1.4398126 | -5.1653266 |
| 38 | H  | -4.2801857 | 2.8189759  | -1.3609786 |
| 39 | H  | -2.9062286 | 3.9913102  | -1.3227242 |
| 40 | H  | 4.2801855  | -2.8189769 | -1.3609785 |
| 41 | H  | 2.9062277  | -3.9913105 | -1.3227249 |
| 42 | H  | 1.9309760  | -2.7367179 | 0.4710203  |
| 43 | H  | -1.9309761 | 2.7367175  | 0.4710204  |
| 44 | C  | -3.4562155 | 1.2294472  | 0.6116893  |
| 45 | C  | -5.3373840 | -0.2169010 | 2.1494546  |
| 46 | C  | -4.3476749 | 0.3261796  | -0.0103020 |
| 47 | C  | -3.5156854 | 1.3941731  | 2.0112471  |
| 48 | C  | -4.4525651 | 0.6765242  | 2.7771459  |
| 49 | C  | -5.2807315 | -0.3934312 | 0.7538005  |
| 50 | H  | -4.3307777 | 0.1915594  | -1.1033403 |
| 51 | H  | -2.8344042 | 2.1041972  | 2.5061891  |
| 52 | H  | -4.5034938 | 0.8305401  | 3.8648134  |
| 53 | H  | -5.9795183 | -1.0822540 | 0.2572981  |
| 54 | H  | -6.0824627 | -0.7650618 | 2.7440509  |
| 55 | C  | 3.4562155  | -1.2294476 | 0.6116889  |
| 56 | C  | 5.3373841  | 0.2169010  | 2.1494537  |
| 57 | C  | 3.5156854  | -1.3941730 | 2.0112468  |

|    |   |            |            |            |
|----|---|------------|------------|------------|
| 58 | C | 4.3476750  | -0.3261803 | -0.0103028 |
| 59 | C | 5.2807316  | 0.3934306  | 0.7537994  |
| 60 | C | 4.4525652  | -0.6765240 | 2.7771452  |
| 61 | H | 2.8344041  | -2.1041969 | 2.5061890  |
| 62 | H | 4.3307778  | -0.1915604 | -1.1033411 |
| 63 | H | 5.9795187  | 1.0822531  | 0.2572968  |
| 64 | H | 4.5034939  | -0.8305395 | 3.8648128  |
| 65 | H | 6.0824629  | 0.7650618  | 2.7440497  |
| 66 | H | -1.6221094 | -2.0557877 | -2.3183121 |
| 67 | H | 1.6221097  | 2.0557868  | -2.3183122 |
| 68 | H | 2.3047305  | 3.2143395  | 2.4495001  |
| 69 | H | -2.3047305 | -3.2143397 | 2.4495004  |
| 70 | C | 2.7642558  | 3.7880333  | 0.4022884  |
| 71 | H | 3.3693352  | 4.6600735  | 0.6873616  |
| 72 | H | 3.0178339  | 4.0554757  | -1.7547069 |
| 73 | C | 2.5705987  | 3.4572497  | -0.9491574 |
| 74 | C | -2.7642557 | -3.7880338 | 0.4022888  |
| 75 | H | -3.3693347 | -4.6600742 | 0.6873619  |
| 76 | H | -3.0178336 | -4.0554767 | -1.7547065 |
| 77 | C | -2.5705985 | -3.4572504 | -0.9491571 |

$[\text{Fe}((R)\text{-}L^2\text{Ph})(\text{terpy})]^{2+}$ , high-spin

|    |    |            |            |            |
|----|----|------------|------------|------------|
| 1  | Fe | 0.0000001  | -0.0000010 | -0.6120387 |
| 2  | N  | -0.0000003 | -0.0000007 | 1.5176862  |
| 3  | C  | 0.6023782  | 1.0188772  | 2.1776722  |
| 4  | C  | 0.6146331  | 1.0489026  | 3.5875689  |
| 5  | C  | -0.0000008 | -0.0000002 | 4.2895013  |
| 6  | H  | -0.0000008 | -0.0000001 | 5.3887424  |
| 7  | C  | -0.6146346 | -1.0489032 | 3.5875691  |
| 8  | H  | -1.0961747 | -1.8679716 | 4.1357195  |
| 9  | C  | -0.6023790 | -1.0188785 | 2.1776722  |
| 10 | C  | 1.2236460  | 2.0573947  | 1.3050394  |
| 11 | N  | 1.1208862  | 1.8367491  | -0.0362453 |
| 12 | C  | 1.6648931  | 2.7201272  | -0.8956016 |
| 13 | C  | 1.8824826  | 3.1985445  | 1.8059676  |
| 14 | C  | -1.2236466 | -2.0573962 | 1.3050395  |
| 15 | N  | -1.1208871 | -1.8367502 | -0.0362452 |
| 16 | C  | -1.6648948 | -2.7201277 | -0.8956015 |
| 17 | C  | -1.8824827 | -3.1985462 | 1.8059678  |
| 18 | N  | 0.0000003  | -0.0000006 | -2.7243646 |
| 19 | C  | -0.9279561 | 0.7232533  | -3.4058425 |
| 20 | C  | -0.9517502 | 0.7547357  | -4.8131536 |
| 21 | H  | -1.7029299 | 1.3555536  | -5.3451745 |
| 22 | C  | -0.0000003 | 0.0000002  | -5.5223723 |
| 23 | H  | -0.0000008 | 0.0000005  | -6.6210427 |
| 24 | C  | 0.9517498  | -0.7547359 | -4.8131550 |
| 25 | C  | 0.9279563  | -0.7232542 | -3.4058438 |
| 26 | C  | -1.8599937 | 1.4316743  | -2.5048369 |
| 27 | N  | -1.7102147 | 1.2829164  | -1.2123522 |
| 28 | C  | -2.7304942 | 1.9931138  | -0.4069654 |
| 29 | C  | -3.5185274 | 2.9713494  | -1.3501921 |
| 30 | S  | -3.1495620 | 2.4644581  | -3.0899297 |
| 31 | C  | 1.8599956  | -1.4316761 | -2.5048405 |
| 32 | N  | 1.7102155  | -1.2829180 | -1.2123545 |
| 33 | C  | 2.7304964  | -1.9931166 | -0.4069658 |
| 34 | C  | 3.5185302  | -2.9713498 | -1.3501951 |
| 35 | S  | 3.1495638  | -2.4644575 | -3.0899309 |
| 36 | H  | 1.0961728  | 1.8679712  | 4.1357191  |
| 37 | H  | 1.7029292  | -1.3555533 | -5.3451764 |
| 38 | H  | -4.6111575 | 2.9171674  | -1.1928145 |
| 39 | H  | -3.1949231 | 4.0229179  | -1.2333952 |
| 40 | H  | 4.6111604  | -2.9171668 | -1.1928167 |

|    |   |            |            |            |
|----|---|------------|------------|------------|
| 41 | H | 3.1949270  | -4.0229189 | -1.2333983 |
| 42 | H | 2.1922624  | -2.6033172 | 0.3464113  |
| 43 | H | -2.1922608 | 2.6033132  | 0.3464110  |
| 44 | C | -3.6372538 | 1.0230810  | 0.3510454  |
| 45 | C | -5.4493388 | -0.6309932 | 1.7569818  |
| 46 | C | -4.3608120 | 0.0158713  | -0.3274249 |
| 47 | C | -3.8277059 | 1.1851076  | 1.7396662  |
| 48 | C | -4.7285589 | 0.3632203  | 2.4406493  |
| 49 | C | -5.2630535 | -0.8026184 | 0.3721918  |
| 50 | H | -4.2415461 | -0.1171835 | -1.4136291 |
| 51 | H | -3.2854824 | 1.9803685  | 2.2753175  |
| 52 | H | -4.8815752 | 0.5133255  | 3.5192817  |
| 53 | H | -5.8375777 | -1.5695608 | -0.1676377 |
| 54 | H | -6.1687725 | -1.2625226 | 2.2981514  |
| 55 | C | 3.6372548  | -1.0230812 | 0.3510446  |
| 56 | C | 5.4493372  | 0.6309976  | 1.7569821  |
| 57 | C | 3.8277063  | -1.1851056 | 1.7396661  |
| 58 | C | 4.3608139  | -0.0158711 | -0.3274254 |
| 59 | C | 5.2630535  | 0.8026208  | 0.3721923  |
| 60 | C | 4.7285580  | -0.3632158 | 2.4406492  |
| 61 | H | 3.2854829  | -1.9803671 | 2.2753180  |
| 62 | H | 4.2415494  | 0.1171823  | -1.4136306 |
| 63 | H | 5.8375771  | 1.5695633  | -0.1676373 |
| 64 | H | 4.8815726  | -0.5133198 | 3.5192819  |
| 65 | H | 6.1687689  | 1.2625283  | 2.2981518  |
| 66 | H | 1.9619630  | 3.3743231  | 2.8860359  |
| 67 | H | 1.5591771  | 2.4901768  | -1.9668662 |
| 68 | H | -1.5591793 | -2.4901770 | -1.9668661 |
| 69 | H | -1.9619626 | -3.3743252 | 2.8860361  |
| 70 | C | 2.4401431  | 4.1202757  | 0.9068025  |
| 71 | H | 2.9527777  | 5.0176119  | 1.2818164  |
| 72 | H | 2.7580625  | 4.5730738  | -1.2102717 |
| 73 | C | 2.3342716  | 3.8786116  | -0.4720309 |
| 74 | C | -2.3342730 | -3.8786125 | -0.4720311 |
| 75 | H | -2.7580641 | -4.5730744 | -1.2102719 |
| 76 | C | -2.4401434 | -4.1202773 | 0.9068024  |
| 77 | H | -2.9527777 | -5.0176139 | 1.2818162  |

[Fe(*R*)-*L*<sup>2</sup>Ph)(terpy)]<sup>2+</sup>, low-spin

|    |    |            |            |            |
|----|----|------------|------------|------------|
| 1  | Fe | 0.0000000  | 0.0000001  | -0.6697074 |
| 2  | N  | 0.0000001  | 0.0000002  | 1.2252677  |
| 3  | C  | 0.5963865  | 1.0302524  | 1.8922222  |
| 4  | C  | 0.6015700  | 1.0580664  | 3.2990646  |
| 5  | C  | 0.0000002  | 0.0000004  | 4.0023153  |
| 6  | H  | 0.0000001  | 0.0000005  | 5.1010682  |
| 7  | C  | -0.6015696 | -1.0580656 | 3.2990648  |
| 8  | H  | -1.0770656 | -1.8859818 | 3.8403238  |
| 9  | C  | -0.5963862 | -1.0302520 | 1.8922224  |
| 10 | C  | 1.1993931  | 2.0057993  | 0.9704010  |
| 11 | N  | 1.0531281  | 1.6689306  | -0.3563077 |
| 12 | C  | 1.5917515  | 2.4798702  | -1.2959974 |
| 13 | C  | 1.8746649  | 3.1772280  | 1.3584382  |
| 14 | C  | -1.1993928 | -2.0057989 | 0.9704014  |
| 15 | N  | -1.0531278 | -1.6689306 | -0.3563074 |
| 16 | C  | -1.5917511 | -2.4798705 | -1.2959968 |
| 17 | C  | -1.8746645 | -3.1772276 | 1.3584388  |
| 18 | N  | -0.0000001 | 0.0000002  | -2.5696647 |
| 19 | C  | -0.9633837 | 0.6942020  | -3.2459793 |
| 20 | C  | -0.9861700 | 0.7175739  | -4.6531376 |
| 21 | H  | -1.7608068 | 1.2866950  | -5.1853857 |
| 22 | C  | -0.0000001 | 0.0000004  | -5.3567527 |
| 23 | H  | 0.0000001  | 0.0000005  | -6.4554692 |

|    |   |            |            |            |
|----|---|------------|------------|------------|
| 24 | C | 0.9861699  | -0.7175733 | -4.6531377 |
| 25 | C | 0.9633835  | -0.6942017 | -3.2459794 |
| 26 | C | -1.8536788 | 1.3608382  | -2.2916684 |
| 27 | N | -1.6049546 | 1.1424662  | -1.0133864 |
| 28 | C | -2.5528795 | 1.8425399  | -0.1023461 |
| 29 | C | -3.2801542 | 2.9443158  | -0.9404928 |
| 30 | S | -3.1609701 | 2.4404210  | -2.7200586 |
| 31 | C | 1.8536787  | -1.3608379 | -2.2916686 |
| 32 | N | 1.6049546  | -1.1424661 | -1.0133866 |
| 33 | C | 2.5528794  | -1.8425400 | -0.1023463 |
| 34 | C | 3.2801541  | -2.9443158 | -0.9404932 |
| 35 | S | 3.1609701  | -2.4404206 | -2.7200590 |
| 36 | H | 1.0770660  | 1.8859826  | 3.8403234  |
| 37 | H | 1.7608067  | -1.2866944 | -5.1853859 |
| 38 | H | -4.3473149 | 3.0377557  | -0.6703129 |
| 39 | H | -2.7969532 | 3.9356128  | -0.8463219 |
| 40 | H | 4.3473147  | -3.0377558 | -0.6703133 |
| 41 | H | 2.7969530  | -3.9356128 | -0.8463226 |
| 42 | H | 1.9441773  | -2.3457270 | 0.6749664  |
| 43 | H | -1.9441777 | 2.3457267  | 0.6749669  |
| 44 | C | -3.5142758 | 0.8879450  | 0.6056254  |
| 45 | C | -5.4046895 | -0.7258473 | 1.9536649  |
| 46 | C | -4.3410513 | -0.0017940 | -0.1185774 |
| 47 | C | -3.6467004 | 0.9568808  | 2.0092952  |
| 48 | C | -4.5869471 | 0.1557229  | 2.6813923  |
| 49 | C | -5.2795429 | -0.8022658 | 0.5536619  |
| 50 | H | -4.2740158 | -0.0553218 | -1.2157164 |
| 51 | H | -3.0184096 | 1.6578336  | 2.5816653  |
| 52 | H | -4.6912551 | 0.2317939  | 3.7734489  |
| 53 | H | -5.9291688 | -1.4800756 | -0.0192265 |
| 54 | H | -6.1509981 | -1.3435141 | 2.4739506  |
| 55 | C | 3.5142756  | -0.8879454 | 0.6056255  |
| 56 | C | 5.4046891  | 0.7258466  | 1.9536656  |
| 57 | C | 3.6467001  | -0.9568816 | 2.0092952  |
| 58 | C | 4.3410512  | 0.0017938  | -0.1185769 |
| 59 | C | 5.2795427  | 0.8022654  | 0.5536625  |
| 60 | C | 4.5869467  | -0.1557237 | 2.6813927  |
| 61 | H | 3.0184094  | -1.6578345 | 2.5816652  |
| 62 | H | 4.2740157  | 0.0553219  | -1.2157159 |
| 63 | H | 5.9291686  | 1.4800754  | -0.0192256 |
| 64 | H | 4.6912545  | -0.2317950 | 3.7734492  |
| 65 | H | 6.1509976  | 1.3435133  | 2.4739515  |
| 66 | H | 1.9766057  | 3.4256601  | 2.4227878  |
| 67 | H | 1.4672873  | 2.1751883  | -2.3437790 |
| 68 | H | -1.4672869 | -2.1751888 | -2.3437785 |
| 69 | H | -1.9766052 | -3.4256595 | 2.4227885  |
| 70 | C | 2.4181517  | 4.0186704  | 0.3772989  |
| 71 | H | 2.9468337  | 4.9386210  | 0.6636969  |
| 72 | H | 2.6899608  | 4.2832202  | -1.7781736 |
| 73 | C | 2.2765462  | 3.6600356  | -0.9735699 |
| 74 | C | -2.2765458 | -3.6600359 | -0.9735691 |
| 75 | H | -2.6899605 | -4.2832207 | -1.7781726 |
| 76 | C | -2.4181514 | -4.0186702 | 0.3772997  |
| 77 | H | -2.9468334 | -4.9386207 | 0.6636980  |

**[Fe(*R*)-*L*<sup>1</sup>*iPr*(terpy)]<sup>2+</sup> (**12**<sup>2+</sup>), high-spin**

|   |    |            |            |            |
|---|----|------------|------------|------------|
| 1 | Fe | -0.0000009 | -0.0000008 | -0.3094465 |
| 2 | N  | 0.0000006  | -0.0000011 | 1.8194212  |
| 3 | C  | 0.3044164  | 1.1435564  | 2.4834594  |
| 4 | C  | 0.3048266  | 1.1757307  | 3.8933872  |
| 5 | C  | 0.0000031  | -0.0000021 | 4.5967526  |
| 6 | H  | 0.0000041  | -0.0000025 | 5.6958889  |

|    |   |            |            |            |
|----|---|------------|------------|------------|
| 7  | C | -0.3048218 | -1.1757344 | 3.8933870  |
| 8  | H | -0.5425131 | -2.0957119 | 4.4414776  |
| 9  | C | -0.3044141 | -1.1435589 | 2.4834592  |
| 10 | C | 0.6449315  | 2.3055409  | 1.6127303  |
| 11 | N | 0.6102040  | 2.0649483  | 0.2704754  |
| 12 | C | 0.9389332  | 3.0525749  | -0.5861936 |
| 13 | C | 1.0004583  | 3.5745699  | 2.1150422  |
| 14 | C | -0.6449311 | -2.3055426 | 1.6127298  |
| 15 | N | -0.6102053 | -2.0649488 | 0.2704751  |
| 16 | C | -0.9389359 | -3.0525747 | -0.5861940 |
| 17 | C | -1.0004577 | -3.5745721 | 2.1150413  |
| 18 | N | 0.0000000  | -0.0000009 | -2.4481939 |
| 19 | C | -1.0685167 | 0.4794098  | -3.1295364 |
| 20 | C | -1.1093064 | 0.5035000  | -4.5354658 |
| 21 | H | -1.9905955 | 0.9034461  | -5.0548834 |
| 22 | C | 0.0000004  | -0.0000011 | -5.2424270 |
| 23 | H | 0.0000006  | -0.0000009 | -6.3414100 |
| 24 | C | 1.1093069  | -0.5035022 | -4.5354654 |
| 25 | C | 1.0685168  | -0.4794119 | -3.1295360 |
| 26 | C | -2.1277484 | 0.9453431  | -2.2140391 |
| 27 | N | -1.9869691 | 0.8319228  | -0.9213941 |
| 28 | C | -3.2223370 | 1.3716204  | -0.2943675 |
| 29 | C | -4.0382941 | 1.8947624  | -1.5220193 |
| 30 | O | -3.2359650 | 1.5029394  | -2.6934141 |
| 31 | C | 2.1277486  | -0.9453446 | -2.2140388 |
| 32 | N | 1.9869694  | -0.8319239 | -0.9213939 |
| 33 | C | 3.2223378  | -1.3716201 | -0.2943661 |
| 34 | C | 4.0382956  | -1.8947625 | -1.5220173 |
| 35 | O | 3.2359659  | -1.5029403 | -2.6934126 |
| 36 | H | 0.5425186  | 2.0957080  | 4.4414781  |
| 37 | H | 1.9905962  | -0.9034481 | -5.0548827 |
| 38 | H | -5.0340457 | 1.4282983  | -1.6376289 |
| 39 | H | -4.1478700 | 2.9946148  | -1.5553453 |
| 40 | H | 5.0340468  | -1.4282978 | -1.6376271 |
| 41 | H | 4.1478718  | -2.9946148 | -1.5553427 |
| 42 | H | 2.9265056  | -2.2211738 | 0.3567727  |
| 43 | H | -2.9265041 | 2.2211745  | 0.3567703  |
| 44 | H | -0.8999306 | -2.8056085 | -1.6583275 |
| 45 | H | 0.8999266  | 2.8056093  | -1.6583271 |
| 46 | H | 1.0220149  | 3.7655755  | 3.1953152  |
| 47 | H | -1.0220128 | -3.7655783 | 3.1953142  |
| 48 | C | 1.3350130  | 4.6011143  | 1.2186433  |
| 49 | H | 1.6139417  | 5.5955600  | 1.5953730  |
| 50 | H | 1.5692697  | 5.1096885  | -0.8972572 |
| 51 | C | 1.3102720  | 4.3371059  | -0.1604385 |
| 52 | C | -1.3350138 | -4.6011158 | 1.2186425  |
| 53 | H | -1.6139423 | -5.5955616 | 1.5953718  |
| 54 | H | -1.5692735 | -5.1096882 | -0.8972581 |
| 55 | C | -1.3102747 | -4.3371062 | -0.1604390 |
| 56 | C | 3.9537642  | -0.3316286 | 0.6019339  |
| 57 | H | 3.1965357  | -0.0145288 | 1.3531118  |
| 58 | C | -3.9537651 | 0.3316309  | 0.6019333  |
| 59 | H | -3.1965376 | 0.0145306  | 1.3531118  |
| 60 | C | 5.1117419  | -1.0015944 | 1.3654342  |
| 61 | H | 5.5773753  | -0.2853524 | 2.0693778  |
| 62 | H | 5.9147774  | -1.3496966 | 0.6834322  |
| 63 | H | 4.7678488  | -1.8754347 | 1.9547449  |
| 64 | C | 4.4140875  | 0.9199236  | -0.1643093 |
| 65 | H | 4.8248314  | 1.6725243  | 0.5366303  |
| 66 | H | 3.5820604  | 1.3987208  | -0.7181617 |
| 67 | H | 5.2219373  | 0.6929100  | -0.8898519 |
| 68 | C | -4.4140905 | -0.9199213 | -0.1643085 |



|    |   |            |            |            |
|----|---|------------|------------|------------|
| 69 | H | -3.5820639 | -1.3987216 | -0.7181589 |
| 70 | H | -5.2219389 | -0.6929068 | -0.8898525 |
| 71 | H | -4.8248377 | -1.6725195 | 0.5366318  |
| 72 | C | -5.1117419 | 1.0015996  | 1.3654326  |
| 73 | H | -4.7678477 | 1.8754405  | 1.9547417  |
| 74 | H | -5.5773761 | 0.2853594  | 2.0693775  |
| 75 | H | -5.9147771 | 1.3497018  | 0.6834301  |

**[Fe(*R*)-*L*<sup>1</sup>iPr(terpy)]<sup>2+</sup> (**12**<sup>2+</sup>), low-spin**

|    |    |            |            |            |
|----|----|------------|------------|------------|
| 1  | Fe | 0.0000001  | -0.0000001 | -0.3561786 |
| 2  | N  | -0.0000002 | 0.0000003  | 1.5370562  |
| 3  | C  | 0.4002546  | 1.1208128  | 2.2061608  |
| 4  | C  | 0.4045537  | 1.1472632  | 3.6133485  |
| 5  | C  | -0.0000016 | 0.0000012  | 4.3176914  |
| 6  | H  | -0.0000022 | 0.0000015  | 5.4163874  |
| 7  | C  | -0.4045561 | -1.1472613 | 3.6133489  |
| 8  | H  | -0.7216455 | -2.0475841 | 4.1551989  |
| 9  | C  | -0.4002555 | -1.1208119 | 2.2061612  |
| 10 | C  | 0.8044575  | 2.1944110  | 1.2836265  |
| 11 | N  | 0.7235770  | 1.8327152  | -0.0430560 |
| 12 | C  | 1.0757135  | 2.7407071  | -0.9833864 |
| 13 | C  | 1.2383256  | 3.4759960  | 1.6709006  |
| 14 | C  | -0.8044576 | -2.1944106 | 1.2836272  |
| 15 | N  | -0.7235766 | -1.8327154 | -0.0430556 |
| 16 | C  | -1.0757126 | -2.7407078 | -0.9833857 |
| 17 | C  | -1.2383256 | -3.4759956 | 1.6709015  |
| 18 | N  | -0.0000001 | -0.0000001 | -2.2773404 |
| 19 | C  | -1.0620436 | 0.5178762  | -2.9588928 |
| 20 | C  | -1.0962282 | 0.5388289  | -4.3643459 |
| 21 | H  | -1.9627913 | 0.9657355  | -4.8870363 |
| 22 | C  | 0.0000000  | 0.0000009  | -5.0677561 |
| 23 | H  | 0.0000002  | 0.0000014  | -6.1665963 |
| 24 | C  | 1.0962281  | -0.5388276 | -4.3643462 |
| 25 | C  | 1.0620434  | -0.5178759 | -2.9588932 |
| 26 | C  | -2.0455216 | 1.0061949  | -1.9912031 |
| 27 | N  | -1.8003211 | 0.8121195  | -0.7152760 |
| 28 | C  | -2.9541009 | 1.3692255  | 0.0470106  |
| 29 | C  | -3.7395921 | 2.1318549  | -1.0642176 |
| 30 | O  | -3.1521127 | 1.6567071  | -2.3306155 |
| 31 | C  | 2.0455217  | -1.0061948 | -1.9912037 |
| 32 | N  | 1.8003214  | -0.8121201 | -0.7152765 |
| 33 | C  | 2.9541013  | -1.3692263 | 0.0470097  |
| 34 | C  | 3.7395927  | -2.1318548 | -1.0642192 |
| 35 | O  | 3.1521129  | -1.6567065 | -2.3306166 |
| 36 | H  | 0.7216428  | 2.0475863  | 4.1551983  |
| 37 | H  | 1.9627913  | -0.9657337 | -4.8870368 |
| 38 | H  | -4.8197593 | 1.9041493  | -1.0932307 |
| 39 | H  | -3.6002560 | 3.2296477  | -1.0370019 |
| 40 | H  | 4.8197598  | -1.9041486 | -1.0932323 |
| 41 | H  | 3.6002573  | -3.2296477 | -1.0370040 |
| 42 | H  | 2.5595177  | -2.0813793 | 0.8000897  |
| 43 | H  | -2.5595172 | 2.0813777  | 0.8000913  |
| 44 | H  | -1.0031165 | -2.4225374 | -2.0321766 |
| 45 | H  | 1.0031177  | 2.4225364  | -2.0321772 |
| 46 | H  | 1.2918909  | 3.7394982  | 2.7353122  |
| 47 | H  | -1.2918913 | -3.7394974 | 2.7353132  |
| 48 | C  | 1.5981024  | 4.4101698  | 0.6888879  |
| 49 | H  | 1.9373455  | 5.4160526  | 0.9734512  |
| 50 | H  | 1.7910237  | 4.7267397  | -1.4679127 |
| 51 | C  | 1.5167866  | 4.0322298  | -0.6620750 |
| 52 | C  | -1.5981019 | -4.4101698 | 0.6888891  |
| 53 | H  | -1.9373449 | -5.4160525 | 0.9734528  |

|    |   |            |            |            |
|----|---|------------|------------|------------|
| 54 | H | -1.7910223 | -4.7267407 | -1.4679113 |
| 55 | C | -1.5167857 | -4.0322305 | -0.6620739 |
| 56 | C | -3.7719994 | 0.2811379  | 0.8021610  |
| 57 | H | -3.0303838 | -0.2576360 | 1.4286393  |
| 58 | C | 3.7719996  | -0.2811391 | 0.8021609  |
| 59 | H | 3.0303838  | 0.2576340  | 1.4286398  |
| 60 | C | -4.7863239 | 0.9496222  | 1.7500965  |
| 61 | H | -4.2890919 | 1.6121287  | 2.4867592  |
| 62 | H | -5.3536706 | 0.1842253  | 2.3135364  |
| 63 | H | -5.5301231 | 1.5593314  | 1.1974169  |
| 64 | C | -4.4435654 | -0.7436343 | -0.1297607 |
| 65 | H | -3.7231124 | -1.2104460 | -0.8303899 |
| 66 | H | -5.2599067 | -0.2918802 | -0.7286502 |
| 67 | H | -4.9036056 | -1.5562252 | 0.4649986  |
| 68 | C | 4.4435652  | 0.7436340  | -0.1297600 |
| 69 | H | 4.9036036  | 1.5562255  | 0.4649997  |
| 70 | H | 3.7231124  | 1.2104447  | -0.8303901 |
| 71 | H | 5.2599079  | 0.2918810  | -0.7286485 |
| 72 | C | 4.7863243  | -0.9496239 | 1.7500957  |
| 73 | H | 5.3536705  | -0.1842272 | 2.3135365  |
| 74 | H | 5.5301240  | -1.5593320 | 1.1974157  |
| 75 | H | 4.2890926  | -1.6121314 | 2.4867578  |

$[\text{Fe}((R)\text{-}L^2i\text{Pr})(\text{terpy})]^{2+}$ , high-spin

|    |    |            |            |            |
|----|----|------------|------------|------------|
| 1  | Fe | -0.0000003 | 0.0000001  | -0.3520055 |
| 2  | N  | 0.0000002  | 0.0000003  | 1.7840169  |
| 3  | C  | 0.1413320  | 1.1752286  | 2.4485814  |
| 4  | C  | 0.1411504  | 1.2064707  | 3.8584749  |
| 5  | C  | 0.0000018  | 0.0000005  | 4.5617444  |
| 6  | H  | 0.0000025  | 0.0000006  | 5.6608674  |
| 7  | C  | -0.1411477 | -1.2064697 | 3.8584753  |
| 8  | H  | -0.2538280 | -2.1498025 | 4.4070087  |
| 9  | C  | -0.1413309 | -1.1752280 | 2.4485818  |
| 10 | C  | 0.3089094  | 2.3735800  | 1.5764341  |
| 11 | N  | 0.3024046  | 2.1257645  | 0.2346784  |
| 12 | C  | 0.4849702  | 3.1457768  | -0.6274863 |
| 13 | C  | 0.4867585  | 3.6811884  | 2.0730355  |
| 14 | C  | -0.3089092 | -2.3735796 | 1.5764349  |
| 15 | N  | -0.3024054 | -2.1257644 | 0.2346790  |
| 16 | C  | -0.4849717 | -3.1457770 | -0.6274854 |
| 17 | C  | -0.4867580 | -3.6811876 | 2.0730367  |
| 18 | N  | -0.0000001 | 0.0000003  | -2.4763776 |
| 19 | C  | -1.1303330 | 0.3262369  | -3.1538572 |
| 20 | C  | -1.1646011 | 0.3474037  | -4.5614048 |
| 21 | H  | -2.0854292 | 0.6250726  | -5.0934171 |
| 22 | C  | 0.0000004  | 0.0000019  | -5.2694794 |
| 23 | H  | 0.0000005  | 0.0000026  | -6.3683300 |
| 24 | C  | 1.1646016  | -0.3474009 | -4.5614049 |
| 25 | C  | 1.1303331  | -0.3262357 | -3.1538573 |
| 26 | C  | -2.2626005 | 0.6356882  | -2.2522011 |
| 27 | N  | -2.0870329 | 0.5207884  | -0.9602100 |
| 28 | C  | -3.3170999 | 0.7684334  | -0.1762245 |
| 29 | C  | -4.3445109 | 1.4991211  | -1.0966425 |
| 30 | S  | -3.8245408 | 1.1669024  | -2.8419985 |
| 31 | C  | 2.2626004  | -0.6356879 | -2.2522011 |
| 32 | N  | 2.0870327  | -0.5207886 | -0.9602098 |
| 33 | C  | 3.3170993  | -0.7684342 | -0.1762241 |
| 34 | C  | 4.3445102  | -1.4991219 | -1.0966422 |
| 35 | S  | 3.8245407  | -1.1669020 | -2.8419983 |
| 36 | H  | 0.2538316  | 2.1498035  | 4.4070080  |
| 37 | H  | 2.0854299  | -0.6250692 | -5.0934172 |
| 38 | H  | -5.3802519 | 1.1355747  | -0.9635751 |

|    |   |            |            |            |
|----|---|------------|------------|------------|
| 39 | H | -4.3408786 | 2.5963288  | -0.9544921 |
| 40 | H | 5.3802513  | -1.1355761 | -0.9635743 |
| 41 | H | 4.3408772  | -2.5963297 | -0.9544924 |
| 42 | H | 3.0474521  | -1.4538318 | 0.6546203  |
| 43 | H | -3.0474530 | 1.4538308  | 0.6546201  |
| 44 | H | 0.4864057  | 3.8776662  | 3.1525655  |
| 45 | H | 0.4733451  | 2.8892889  | -1.6978340 |
| 46 | H | -0.4733476 | -2.8892893 | -1.6978331 |
| 47 | H | -0.4864044 | -3.8776652 | 3.1525667  |
| 48 | C | 0.6706256  | 4.7407835  | 1.1708833  |
| 49 | H | 0.8092488  | 5.7659233  | 1.5430900  |
| 50 | H | 0.8215975  | 5.2695794  | -0.9477082 |
| 51 | C | 0.6767638  | 4.4709290  | -0.2074555 |
| 52 | C | -0.6767652 | -4.4709290 | -0.2074543 |
| 53 | H | -0.8215996 | -5.2695795 | -0.9477066 |
| 54 | C | -0.6706260 | -4.7407830 | 1.1708847  |
| 55 | H | -0.8092489 | -5.7659228 | 1.5430919  |
| 56 | C | 3.8336388  | 0.5520721  | 0.4812446  |
| 57 | H | 2.9450042  | 0.9693027  | 1.0036697  |
| 58 | C | -3.8336391 | -0.5520733 | 0.4812438  |
| 59 | H | -2.9450045 | -0.9693035 | 1.0036693  |
| 60 | C | -4.3211565 | -1.6076657 | -0.5274358 |
| 61 | H | -3.5658670 | -1.8335941 | -1.3058054 |
| 62 | H | -5.2546168 | -1.2971490 | -1.0377216 |
| 63 | H | -4.5482418 | -2.5558022 | -0.0018953 |
| 64 | C | -4.9029252 | -0.2491953 | 1.5474952  |
| 65 | H | -4.5419482 | 0.4739331  | 2.3064103  |
| 66 | H | -5.1939255 | -1.1760225 | 2.0786048  |
| 67 | H | -5.8291648 | 0.1658917  | 1.1003394  |
| 68 | C | 4.9029243  | 0.2491935  | 1.5474963  |
| 69 | H | 5.1939247  | 1.1760203  | 2.0786063  |
| 70 | H | 5.8291639  | -0.1658939 | 1.1003409  |
| 71 | H | 4.5419466  | -0.4739350 | 2.3064110  |
| 72 | C | 4.3211570  | 1.6076646  | -0.5274347 |
| 73 | H | 4.5482424  | 2.5558009  | -0.0018938 |
| 74 | H | 3.5658678  | 1.8335935  | -1.3058044 |
| 75 | H | 5.2546174  | 1.2971476  | -1.0377201 |

[Fe(*R*)-*L*<sup>2</sup>*i*Pr(terpy)]<sup>2+</sup>, low-spin

|    |    |            |            |            |
|----|----|------------|------------|------------|
| 1  | Fe | 0.0000001  | 0.0000002  | -0.4524618 |
| 2  | N  | 0.0000003  | 0.0000003  | 1.4418778  |
| 3  | C  | 0.1651058  | 1.1791177  | 2.1113995  |
| 4  | C  | 0.1656450  | 1.2053041  | 3.5185984  |
| 5  | C  | 0.0000007  | 0.0000004  | 4.2222886  |
| 6  | H  | 0.0000010  | 0.0000004  | 5.3210058  |
| 7  | C  | -0.1656439 | -1.2053034 | 3.5185985  |
| 8  | H  | -0.3010067 | -2.1497562 | 4.0613447  |
| 9  | C  | -0.1651051 | -1.1791171 | 2.1113997  |
| 10 | C  | 0.3515291  | 2.3108239  | 1.1886046  |
| 11 | N  | 0.3528719  | 1.9385347  | -0.1384019 |
| 12 | C  | 0.5437944  | 2.8926233  | -1.0794969 |
| 13 | C  | 0.5325893  | 3.6521148  | 1.5733864  |
| 14 | C  | -0.3515290 | -2.3108233 | 1.1886049  |
| 15 | N  | -0.3528718 | -1.9385343 | -0.1384017 |
| 16 | C  | -0.5437947 | -2.8926229 | -1.0794965 |
| 17 | C  | -0.5325895 | -3.6521143 | 1.5733867  |
| 18 | N  | -0.0000001 | 0.0000002  | -2.3585142 |
| 19 | C  | -1.1467676 | 0.3029367  | -3.0342912 |
| 20 | C  | -1.1771094 | 0.3169733  | -4.4415952 |
| 21 | H  | -2.1045301 | 0.5701228  | -4.9737590 |
| 22 | C  | -0.0000001 | 0.0000002  | -5.1456185 |
| 23 | H  | -0.0000001 | 0.0000002  | -6.2443681 |

|    |   |            |            |            |
|----|---|------------|------------|------------|
| 24 | C | 1.1771093  | -0.3169729 | -4.4415952 |
| 25 | C | 1.1467675  | -0.3029364 | -3.0342912 |
| 26 | C | -2.2178638 | 0.6099235  | -2.0817352 |
| 27 | N | -1.9227988 | 0.4746338  | -0.8019622 |
| 28 | C | -3.0627303 | 0.7973781  | 0.0965870  |
| 29 | C | -4.0969625 | 1.6135737  | -0.7350701 |
| 30 | S | -3.7980652 | 1.2084209  | -2.5194993 |
| 31 | C | 2.2178638  | -0.6099232 | -2.0817352 |
| 32 | N | 1.9227987  | -0.4746337 | -0.8019622 |
| 33 | C | 3.0627301  | -0.7973784 | 0.0965869  |
| 34 | C | 4.0969624  | -1.6135739 | -0.7350703 |
| 35 | S | 3.7980651  | -1.2084206 | -2.5194995 |
| 36 | H | 0.3010079  | 2.1497569  | 4.0613444  |
| 37 | H | 2.1045300  | -0.5701223 | -4.9737590 |
| 38 | H | -5.1436771 | 1.3566143  | -0.4920291 |
| 39 | H | -3.9697193 | 2.7067625  | -0.6212009 |
| 40 | H | 5.1436769  | -1.3566143 | -0.4920294 |
| 41 | H | 3.9697193  | -2.7067626 | -0.6212013 |
| 42 | H | 2.6663538  | -1.4548694 | 0.8974288  |
| 43 | H | -2.6663541 | 1.4548689  | 0.8974292  |
| 44 | H | 0.5234674  | 3.9268520  | 2.6364702  |
| 45 | H | 0.5451627  | 2.5602756  | -2.1261926 |
| 46 | H | -0.5451631 | -2.5602754 | -2.1261923 |
| 47 | H | -0.5234673 | -3.9268514 | 2.6364706  |
| 48 | C | 0.7243280  | 4.6336295  | 0.5902562  |
| 49 | H | 0.8667560  | 5.6856940  | 0.8744971  |
| 50 | H | 0.8844564  | 4.9758657  | -1.5651416 |
| 51 | C | 0.7325584  | 4.2446694  | -0.7595501 |
| 52 | C | -0.7325590 | -4.2446690 | -0.7595495 |
| 53 | H | -0.8844573 | -4.9758654 | -1.5651410 |
| 54 | C | -0.7243286 | -4.6336291 | 0.5902568  |
| 55 | H | -0.8667567 | -5.6856936 | 0.8744979  |
| 56 | C | 3.6464369  | 0.4683991  | 0.8006152  |
| 57 | H | 2.7704690  | 0.9694550  | 1.2617020  |
| 58 | C | -3.6464370 | -0.4683997 | 0.8006148  |
| 59 | H | -2.7704689 | -0.9694556 | 1.2617014  |
| 60 | C | 4.5861819  | 0.0499572  | 1.9481528  |
| 61 | H | 4.9310659  | 0.9412467  | 2.5063472  |
| 62 | H | 5.4944156  | -0.4675223 | 1.5781111  |
| 63 | H | 4.0823926  | -0.6259595 | 2.6681445  |
| 64 | C | 4.3178642  | 1.4718424  | -0.1532014 |
| 65 | H | 4.6226704  | 2.3780363  | 0.4056519  |
| 66 | H | 3.6451298  | 1.7995009  | -0.9701330 |
| 67 | H | 5.2358782  | 1.0580412  | -0.6161411 |
| 68 | C | -4.3178640 | -1.4718429 | -0.1532023 |
| 69 | H | -3.6451294 | -1.7995009 | -0.9701340 |
| 70 | H | -5.2358780 | -1.0580416 | -0.6161421 |
| 71 | H | -4.6226700 | -2.3780370 | 0.4056506  |
| 72 | C | -4.5861823 | -0.0499585 | 1.9481523  |
| 73 | H | -4.0823931 | 0.6259581  | 2.6681443  |
| 74 | H | -4.9310660 | -0.9412483 | 2.5063465  |
| 75 | H | -5.4944159 | 0.4675209  | 1.5781108  |

---

**Table S14** Atomic coordinates for the DFT-minimised metal-free ligands. Other minimised ligands in Table S11 are taken from ref. 2 and 13.

| <i>L</i> <sup>1</sup> Ph |   |            |            |            |
|--------------------------|---|------------|------------|------------|
| 1                        | N | 0.0000000  | 0.0000001  | 1.7009392  |
| 2                        | C | 1.1222450  | 0.2657104  | 2.3907377  |
| 3                        | C | 1.1767054  | 0.2730672  | 3.8065004  |
| 4                        | H | 2.1226235  | 0.4910608  | 4.3180646  |
| 5                        | C | 0.0000001  | 0.0000000  | 4.5171908  |
| 6                        | H | 0.0000001  | 0.0000000  | 5.6168732  |
| 7                        | C | -1.1767053 | -0.2730672 | 3.8065005  |
| 8                        | C | -1.1222450 | -0.2657104 | 2.3907377  |
| 9                        | C | 2.3444953  | 0.5769299  | 1.5972593  |
| 10                       | N | 2.4440199  | 0.5916648  | 0.3156683  |
| 11                       | C | 3.8163545  | 1.0153128  | 0.0046995  |
| 12                       | C | 4.5467703  | 0.9845421  | 1.3902539  |
| 13                       | O | 3.4614732  | 0.8793451  | 2.3445946  |
| 14                       | C | -2.3444954 | -0.5769298 | 1.5972593  |
| 15                       | N | -2.4440199 | -0.5916647 | 0.3156683  |
| 16                       | C | -3.8163545 | -1.0153128 | 0.0046995  |
| 17                       | C | -4.5467704 | -0.9845421 | 1.3902538  |
| 18                       | O | -3.4614732 | -0.8793451 | 2.3445946  |
| 19                       | H | -2.1226234 | -0.4910608 | 4.3180647  |
| 20                       | H | 5.2034317  | 0.0954229  | 1.4997882  |
| 21                       | H | 5.1299196  | 1.8964614  | 1.6197701  |
| 22                       | H | -5.2034316 | -0.0954229 | 1.4997882  |
| 23                       | H | -5.1299196 | -1.8964614 | 1.6197700  |
| 24                       | H | -3.7574704 | -2.0654679 | -0.3665231 |
| 25                       | H | 3.7574704  | 2.0654679  | -0.3665231 |
| 26                       | C | 4.4935236  | 0.1896039  | -1.0823569 |
| 27                       | C | 5.7928575  | -1.3145608 | -3.0968491 |
| 28                       | C | 5.7703766  | 0.5685830  | -1.5535568 |
| 29                       | C | 3.8723280  | -0.9480565 | -1.6360921 |
| 30                       | C | 4.5197696  | -1.6939658 | -2.6374590 |
| 31                       | C | 6.4182103  | -0.1790807 | -2.5505645 |
| 32                       | H | 6.2621413  | 1.4661718  | -1.1456957 |
| 33                       | H | 2.8704716  | -1.2270308 | -1.2807490 |
| 34                       | H | 4.0217025  | -2.5772731 | -3.0646623 |
| 35                       | H | 7.4117286  | 0.1303162  | -2.9080280 |
| 36                       | H | 6.2952239  | -1.8983445 | -3.8823017 |
| 37                       | C | -4.4935236 | -0.1896039 | -1.0823569 |
| 38                       | C | -5.7928576 | 1.3145608  | -3.0968491 |
| 39                       | C | -5.7703766 | -0.5685830 | -1.5535568 |
| 40                       | C | -3.8723281 | 0.9480565  | -1.6360921 |
| 41                       | C | -4.5197696 | 1.6939659  | -2.6374590 |
| 42                       | C | -6.4182102 | 0.1790806  | -2.5505646 |
| 43                       | H | -6.2621412 | -1.4661719 | -1.1456958 |
| 44                       | H | -2.8704717 | 1.2270309  | -1.2807490 |
| 45                       | H | -4.0217026 | 2.5772731  | -3.0646622 |
| 46                       | H | -7.4117285 | -0.1303163 | -2.9080280 |
| 47                       | H | -6.2952240 | 1.8983445  | -3.8823017 |

| <i>L</i> <sup>1</sup> iPr |   |            |            |           |
|---------------------------|---|------------|------------|-----------|
| 1                         | N | 0.0000001  | -0.0000001 | 1.0856665 |
| 2                         | C | 1.1356937  | 0.2055958  | 1.7742872 |
| 3                         | C | 1.1890854  | 0.2165795  | 3.1898707 |
| 4                         | H | 2.1433996  | 0.3921364  | 3.7024918 |
| 5                         | C | -0.0000002 | 0.0000007  | 3.8998861 |
| 6                         | H | -0.0000004 | 0.0000011  | 4.9998364 |
| 7                         | C | -1.1890857 | -0.2165785 | 3.1898706 |
| 8                         | C | -1.1356938 | -0.2055956 | 1.7742870 |
| 9                         | C | 2.3755668  | 0.4262015  | 0.9769113 |

|    |   |            |            |            |
|----|---|------------|------------|------------|
| 10 | N | 2.4621594  | 0.4697031  | -0.3045022 |
| 11 | C | 3.8777413  | 0.6971412  | -0.6312776 |
| 12 | C | 4.5968770  | 0.7501117  | 0.7575976  |
| 13 | O | 3.5224919  | 0.5962790  | 1.7199123  |
| 14 | C | -2.3755667 | -0.4262016 | 0.9769110  |
| 15 | N | -2.4621592 | -0.4697031 | -0.3045025 |
| 16 | C | -3.8777411 | -0.6971414 | -0.6312780 |
| 17 | C | -4.5968767 | -0.7501127 | 0.7575972  |
| 18 | O | -3.5224918 | -0.5962794 | 1.7199119  |
| 19 | H | -2.1434001 | -0.3921351 | 3.7024915  |
| 20 | H | 5.3245615  | -0.0731434 | 0.9147814  |
| 21 | H | 5.1080572  | 1.7126268  | 0.9569064  |
| 22 | H | -5.3245620 | 0.0731418  | 0.9147811  |
| 23 | H | -5.1080562 | -1.7126281 | 0.9569057  |
| 24 | H | -3.9534316 | -1.6845720 | -1.1398594 |
| 25 | H | 3.9534320  | 1.6845720  | -1.1398586 |
| 26 | C | 4.4087605  | -0.3640355 | -1.6369638 |
| 27 | H | 3.7582372  | -0.2511619 | -2.5307616 |
| 28 | C | 5.8557557  | -0.0584656 | -2.0624609 |
| 29 | H | 6.5695854  | -0.1798201 | -1.2203110 |
| 30 | H | 5.9618712  | 0.9769574  | -2.4465902 |
| 31 | H | 6.1845531  | -0.7481117 | -2.8654791 |
| 32 | C | 4.2438586  | -1.8065474 | -1.1310376 |
| 33 | H | 4.8683780  | -2.0119490 | -0.2355842 |
| 34 | H | 4.5503873  | -2.5308934 | -1.9119673 |
| 35 | H | 3.1881545  | -2.0127819 | -0.8686588 |
| 36 | C | -4.4087603 | 0.3640356  | -1.6369637 |
| 37 | H | -3.7582372 | 0.2511625  | -2.5307616 |
| 38 | C | -5.8557556 | 0.0584657  | -2.0624609 |
| 39 | H | -6.5695853 | 0.1798205  | -1.2203110 |
| 40 | H | -5.9618713 | -0.9769574 | -2.4465899 |
| 41 | H | -6.1845530 | 0.7481117  | -2.8654791 |
| 42 | C | -4.2438588 | 1.8065473  | -1.1310368 |
| 43 | H | -4.8683773 | 2.0119481  | -0.2355826 |
| 44 | H | -4.5503888 | 2.5308936  | -1.9119659 |
| 45 | H | -3.1881545 | 2.0127821  | -0.8686591 |

### $L^2\text{Ph}$

|    |   |            |            |            |
|----|---|------------|------------|------------|
| 1  | N | -1.6136305 | -0.0150330 | 0.1921035  |
| 2  | C | -2.3944337 | 0.5546040  | -0.7422866 |
| 3  | C | -3.8056098 | 0.6014832  | -0.6297429 |
| 4  | H | -4.4184947 | 1.0648512  | -1.4160122 |
| 5  | C | -4.4053312 | 0.0424310  | 0.5068460  |
| 6  | H | -5.4975281 | 0.0670844  | 0.6307842  |
| 7  | C | -3.5912621 | -0.5458088 | 1.4842353  |
| 8  | C | -2.1898471 | -0.5576878 | 1.2793659  |
| 9  | C | -1.6971072 | 1.1409653  | -1.9300166 |
| 10 | N | -0.4220020 | 1.1709798  | -2.0596168 |
| 11 | C | 0.0395907  | 1.8813198  | -3.2417322 |
| 12 | C | -1.1671268 | 2.1405912  | -4.2269546 |
| 13 | S | -2.6951974 | 1.9124480  | -3.2318335 |
| 14 | C | -1.2710345 | -1.1726746 | 2.2876615  |
| 15 | N | 0.0072654  | -1.1536809 | 2.1882925  |
| 16 | C | 0.6918305  | -1.9150666 | 3.2233776  |
| 17 | C | -0.3048159 | -2.2287913 | 4.4034132  |
| 18 | S | -1.9915132 | -2.0602635 | 3.6967409  |
| 19 | H | -4.0300936 | -0.9812706 | 2.3932131  |
| 20 | H | -1.1575892 | 3.1636160  | -4.6465579 |
| 21 | H | -1.1779865 | 1.4127012  | -5.0614950 |
| 22 | H | -0.1818067 | -3.2504596 | 4.8071002  |
| 23 | H | -0.1967389 | -1.5032510 | 5.2333174  |
| 24 | H | 1.5062623  | -1.2759544 | 3.6297993  |

|    |   |           |            |            |
|----|---|-----------|------------|------------|
| 25 | H | 0.7667084 | 1.2222400  | -3.7654537 |
| 26 | C | 0.8003125 | 3.1617299  | -2.8638349 |
| 27 | C | 2.2160878 | 5.5306721  | -2.2285184 |
| 28 | C | 0.8980936 | 3.6001881  | -1.5281635 |
| 29 | C | 1.4350330 | 3.9164959  | -3.8758404 |
| 30 | C | 2.1349329 | 5.0927502  | -3.5629838 |
| 31 | C | 1.5985966 | 4.7789317  | -1.2150322 |
| 32 | H | 0.4331536 | 2.9994978  | -0.7343821 |
| 33 | H | 1.3864854 | 3.5787325  | -4.9234495 |
| 34 | H | 2.6237036 | 5.6672974  | -4.3641000 |
| 35 | H | 1.6645994 | 5.1083446  | -0.1671594 |
| 36 | H | 2.7643518 | 6.4517267  | -1.9808227 |
| 37 | C | 1.3665394 | -3.1665301 | 2.6378317  |
| 38 | C | 2.6342672 | -5.4829461 | 1.6116380  |
| 39 | C | 1.2131754 | -3.5265863 | 1.2837455  |
| 40 | C | 2.1780178 | -3.9727193 | 3.4669830  |
| 41 | C | 2.8044741 | -5.1230446 | 2.9608742  |
| 42 | C | 1.8407059 | -4.6788323 | 0.7768406  |
| 43 | H | 0.6087004 | -2.8866635 | 0.6262930  |
| 44 | H | 2.3300865 | -3.6963117 | 4.5223582  |
| 45 | H | 3.4328934 | -5.7382662 | 3.6222943  |
| 46 | H | 1.7086360 | -4.9462983 | -0.2823335 |
| 47 | H | 3.1246457 | -6.3835413 | 1.2132130  |

$L^2iPr$

|    |   |            |            |            |
|----|---|------------|------------|------------|
| 1  | N | -1.2546341 | 0.0045804  | 0.1637382  |
| 2  | C | -2.0407906 | 0.5569695  | -0.7768307 |
| 3  | C | -3.4501845 | 0.6245422  | -0.6481588 |
| 4  | H | -4.0677524 | 1.0718282  | -1.4400624 |
| 5  | C | -4.0411467 | 0.1113921  | 0.5140599  |
| 6  | H | -5.1312948 | 0.1533485  | 0.6513409  |
| 7  | C | -3.2211049 | -0.4549287 | 1.4995193  |
| 8  | C | -1.8226305 | -0.4945429 | 1.2757199  |
| 9  | C | -1.3533380 | 1.1168161  | -1.9826942 |
| 10 | N | -0.0815045 | 1.1449927  | -2.1319358 |
| 11 | C | 0.3702410  | 1.7995480  | -3.3514618 |
| 12 | C | -0.8483080 | 2.0837756  | -4.3080094 |
| 13 | S | -2.3706077 | 1.8263546  | -3.3106769 |
| 14 | C | -0.9017542 | -1.1115942 | 2.2810347  |
| 15 | N | 0.3733043  | -1.1356206 | 2.1616698  |
| 16 | C | 1.0694091  | -1.8429995 | 3.2272775  |
| 17 | C | 0.0724564  | -2.2086527 | 4.3920902  |
| 18 | S | -1.6222640 | -1.8924433 | 3.7556167  |
| 19 | H | -3.6549193 | -0.8579893 | 2.4256930  |
| 20 | H | -0.8506094 | 3.1171981  | -4.7051283 |
| 21 | H | -0.8663384 | 1.3868227  | -5.1677740 |
| 22 | H | 0.1427057  | -3.2691129 | 4.7022441  |
| 23 | H | 0.2352820  | -1.5790244 | 5.2874832  |
| 24 | H | 1.8359132  | -1.1465856 | 3.6330947  |
| 25 | H | 1.0581338  | 1.0932938  | -3.8660961 |
| 26 | C | 1.2307966  | 3.0527963  | -2.9913547 |
| 27 | H | 1.9741857  | 2.6716968  | -2.2587133 |
| 28 | C | 2.0000976  | 3.5769990  | -4.2158803 |
| 29 | H | 2.6083029  | 2.7793967  | -4.6893218 |
| 30 | H | 2.6898821  | 4.3947982  | -3.9260855 |
| 31 | H | 1.3194327  | 3.9878379  | -4.9913943 |
| 32 | C | 0.4278083  | 4.1665675  | -2.2971100 |
| 33 | H | 1.1053148  | 4.9744419  | -1.9546354 |
| 34 | H | -0.1089376 | 3.7831333  | -1.4080137 |
| 35 | H | -0.3161192 | 4.6314543  | -2.9762085 |
| 36 | C | 1.8566290  | -3.0545055 | 2.6328207  |
| 37 | H | 2.4589923  | -2.6131700 | 1.8104732  |

|    |   |           |            |           |
|----|---|-----------|------------|-----------|
| 38 | C | 2.8330674 | -3.6559814 | 3.6594627 |
| 39 | H | 3.5270961 | -2.8911691 | 4.0643035 |
| 40 | H | 3.4459876 | -4.4509226 | 3.1901739 |
| 41 | H | 2.3045544 | -4.1185764 | 4.5184357 |
| 42 | C | 0.9403110 | -4.1221548 | 2.0117129 |
| 43 | H | 1.5449084 | -4.9399426 | 1.5711095 |
| 44 | H | 0.3162167 | -3.6899532 | 1.2064089 |
| 45 | H | 0.2632095 | -4.5807149 | 2.7620632 |

bimpy

|    |   |            |            |            |
|----|---|------------|------------|------------|
| 1  | N | 0.0000000  | 0.0000000  | 0.6166300  |
| 2  | C | -1.1622556 | -0.0019720 | 1.2954017  |
| 3  | C | -1.2077964 | -0.0044103 | 2.7151712  |
| 4  | C | 0.0000000  | 0.0000000  | 3.4236008  |
| 5  | H | 0.0000000  | 0.0000000  | 4.5231928  |
| 6  | C | 1.2077964  | 0.0044103  | 2.7151712  |
| 7  | H | 2.1570400  | 0.0104528  | 3.2695011  |
| 8  | C | 1.1622557  | 0.0019721  | 1.2954017  |
| 9  | C | -2.4013163 | -0.0001150 | 0.4844911  |
| 10 | N | -2.4579934 | -0.0067528 | -0.8409254 |
| 11 | C | -3.8025879 | -0.0036945 | -1.1528298 |
| 12 | C | -4.5971454 | 0.0075171  | 0.0409746  |
| 13 | N | -3.6718166 | 0.0105412  | 1.0676437  |
| 14 | C | 2.4013163  | 0.0001150  | 0.4844911  |
| 15 | N | 2.4579934  | 0.0067528  | -0.8409254 |
| 16 | C | 3.8025879  | 0.0036945  | -1.1528298 |
| 17 | C | 4.5971454  | -0.0075171 | 0.0409746  |
| 18 | N | 3.6718166  | -0.0105412 | 1.0676437  |
| 19 | H | -2.1570400 | -0.0104527 | 3.2695011  |
| 20 | H | 6.6063691  | -0.0224685 | 0.9355531  |
| 21 | C | 6.0040235  | -0.0135757 | 0.0155746  |
| 22 | C | 4.4413988  | 0.0090880  | -2.4144795 |
| 23 | H | 3.8396248  | 0.0176653  | -3.3337458 |
| 24 | H | 7.7075930  | -0.0127822 | -1.3179762 |
| 25 | C | 6.6097576  | -0.0081038 | -1.2497599 |
| 26 | C | 5.8407739  | 0.0030352  | -2.4447293 |
| 27 | H | 6.3626931  | 0.0066565  | -3.4128731 |
| 28 | H | -3.8396248 | -0.0176652 | -3.3337458 |
| 29 | C | -4.4413988 | -0.0090880 | -2.4144796 |
| 30 | C | -6.0040235 | 0.0135757  | 0.0155746  |
| 31 | H | -6.6063691 | 0.0224684  | 0.9355531  |
| 32 | C | -6.6097576 | 0.0081038  | -1.2497599 |
| 33 | H | -7.7075930 | 0.0127821  | -1.3179762 |
| 34 | H | -6.3626931 | -0.0066566 | -3.4128731 |
| 35 | C | -5.8407739 | -0.0030353 | -2.4447293 |
| 36 | H | -3.8900654 | 0.0239535  | 2.0612959  |
| 37 | H | 3.8900654  | -0.0239535 | 2.0612959  |

terpy

|    |   |            |            |            |
|----|---|------------|------------|------------|
| 1  | N | -0.0001994 | -0.0009588 | 0.0870561  |
| 2  | C | 1.1480550  | -0.2103486 | 0.7561340  |
| 3  | C | 1.1880726  | -0.2258352 | 2.1737789  |
| 4  | C | -0.0013767 | -0.0080019 | 2.8804540  |
| 5  | H | -0.0018648 | -0.0109048 | 3.9804373  |
| 6  | C | -1.1901900 | 0.2136120  | 2.1738852  |
| 7  | H | -2.1238235 | 0.3845335  | 2.7250250  |
| 8  | C | -1.1489583 | 0.2053872  | 0.7562175  |
| 9  | C | 2.3898048  | -0.4178383 | -0.0754176 |
| 10 | N | 2.2418344  | -0.3434779 | -1.4165485 |
| 11 | C | 3.3159042  | -0.5201986 | -2.1950729 |
| 12 | C | 3.6523243  | -0.6816444 | 0.5138604  |
| 13 | C | -2.3898943 | 0.4175412  | -0.0753804 |



|    |   |            |            |            |
|----|---|------------|------------|------------|
| 14 | N | -2.2407205 | 0.3499856  | -1.4167340 |
| 15 | C | -3.3139455 | 0.5313975  | -2.1953413 |
| 16 | C | -3.6527548 | 0.6793404  | 0.5140795  |
| 17 | H | 2.1212446  | -0.3994135 | 2.7248677  |
| 18 | H | -3.1403075 | 0.4645502  | -3.2848170 |
| 19 | H | 3.1432361  | -0.4478729 | -3.2843523 |
| 20 | H | 3.7736385  | -0.7464011 | 1.6030974  |
| 21 | H | -3.7749646 | 0.7388435  | 1.6035153  |
| 22 | C | 4.7708156  | -0.8667560 | -0.3116325 |
| 23 | H | 5.7570156  | -1.0726385 | 0.1305460  |
| 24 | H | 5.4562453  | -0.9224661 | -2.3902278 |
| 25 | C | 4.6086696  | -0.7851732 | -1.7030844 |
| 26 | C | -4.7703324 | 0.8695367  | -0.3115043 |
| 27 | H | -5.7567663 | 1.0740561  | 0.1307845  |
| 28 | H | -5.4537992 | 0.9362939  | -2.3904202 |
| 29 | C | -4.6069631 | 0.7948520  | -1.7032056 |

---

**Table S15** Atomic coordinates for the other DFT-minimised molecules used to calculate  $\Delta E\{\text{het}\}$  (Tables S11-S12).

| <u>[Fe(bimpy)<sub>2</sub>]<sup>2+</sup>, high-spin</u> |    |            |            |            |
|--------------------------------------------------------|----|------------|------------|------------|
| 1                                                      | Fe | 0.0000003  | 0.0000011  | -0.0284933 |
| 2                                                      | N  | -0.0000001 | 0.0000001  | 2.1596401  |
| 3                                                      | C  | -0.8344271 | -0.8340029 | 2.8226546  |
| 4                                                      | C  | -0.8623816 | -0.8619058 | 4.2342726  |
| 5                                                      | C  | 0.0000009  | -0.0000004 | 4.9338439  |
| 6                                                      | H  | 0.0000015  | -0.0000007 | 6.0330500  |
| 7                                                      | C  | 0.8623829  | 0.8619053  | 4.2342723  |
| 8                                                      | H  | 1.5349351  | 1.5340847  | 4.7839424  |
| 9                                                      | C  | 0.8344272  | 0.8340029  | 2.8226545  |
| 10                                                     | C  | -1.6484349 | -1.6478089 | 1.9113448  |
| 11                                                     | N  | -1.5262859 | -1.5256916 | 0.5786055  |
| 12                                                     | C  | -2.4251122 | -2.4246335 | 0.0245729  |
| 13                                                     | C  | -3.1114651 | -3.1109641 | 1.0772421  |
| 14                                                     | N  | -2.5879141 | -2.5872912 | 2.2515999  |
| 15                                                     | C  | 1.6484348  | 1.6478087  | 1.9113439  |
| 16                                                     | N  | 1.5262847  | 1.5256903  | 0.5786047  |
| 17                                                     | C  | 2.4251112  | 2.4246333  | 0.0245736  |
| 18                                                     | C  | 3.1114647  | 3.1109634  | 1.0772432  |
| 19                                                     | N  | 2.5879144  | 2.5872903  | 2.2516000  |
| 20                                                     | N  | 0.0000010  | 0.0000010  | -2.1634776 |
| 21                                                     | C  | 0.8335269  | -0.8331706 | -2.8455202 |
| 22                                                     | C  | 0.8597019  | -0.8593034 | -4.2545797 |
| 23                                                     | H  | 1.5346378  | -1.5339282 | -4.7988801 |
| 24                                                     | C  | 0.0000004  | 0.0000003  | -4.9612478 |
| 25                                                     | H  | 0.0000001  | 0.0000000  | -6.0598368 |
| 26                                                     | C  | -0.8597011 | 0.8593041  | -4.2545798 |
| 27                                                     | C  | -0.8335256 | 0.8331718  | -2.8455203 |
| 28                                                     | C  | 1.6441517  | -1.6436272 | -1.9386504 |
| 29                                                     | N  | 1.5090960  | -1.5086541 | -0.6066238 |
| 30                                                     | C  | 2.4033275  | -2.4029448 | -0.0302585 |
| 31                                                     | C  | 3.0982786  | -3.0978026 | -1.0699824 |
| 32                                                     | N  | 2.5866119  | -2.5860262 | -2.2564244 |
| 33                                                     | C  | -1.6441523 | 1.6436264  | -1.9386502 |
| 34                                                     | N  | -1.5090982 | 1.5086512  | -0.6066237 |
| 35                                                     | C  | -2.4033277 | 2.4029444  | -0.0302590 |
| 36                                                     | C  | -3.0982800 | 3.0978009  | -1.0699831 |
| 37                                                     | N  | -2.5866151 | 2.5860228  | -2.2564247 |
| 38                                                     | H  | -1.5349332 | -1.5340858 | 4.7839428  |
| 39                                                     | H  | -1.5346377 | 1.5339281  | -4.7988802 |
| 40                                                     | H  | 4.6131287  | 4.6127354  | 1.6450549  |
| 41                                                     | C  | 4.0909451  | 4.0905510  | 0.8317532  |
| 42                                                     | C  | 2.7240029  | 2.7236559  | -1.3238975 |
| 43                                                     | H  | 2.2075245  | 2.2072138  | -2.1433187 |
| 44                                                     | H  | 5.1265630  | 5.1264000  | -0.7550630 |
| 45                                                     | C  | 4.3687441  | 4.3684824  | -0.5114388 |
| 46                                                     | C  | 3.6968188  | 3.6965804  | -1.5707671 |
| 47                                                     | H  | 3.9542089  | 3.9540841  | -2.6078700 |
| 48                                                     | H  | -2.2075259 | -2.2072122 | -2.1433191 |
| 49                                                     | C  | -2.7240041 | -2.7236550 | -1.3238983 |
| 50                                                     | C  | -4.0909455 | -4.0905516 | 0.8317518  |
| 51                                                     | H  | -4.6131287 | -4.6127365 | 1.6450534  |
| 52                                                     | C  | -4.3687450 | -4.3684822 | -0.5114403 |
| 53                                                     | H  | -5.1265640 | -5.1263996 | -0.7550649 |
| 54                                                     | H  | -3.9542103 | -3.9540823 | -2.6078714 |
| 55                                                     | C  | -3.6968201 | -3.6965794 | -1.5707684 |
| 56                                                     | H  | -2.8611765 | -2.8605661 | 3.1959251  |
| 57                                                     | H  | 2.8611765  | 2.8605646  | 3.1959254  |
| 58                                                     | H  | 2.8684919  | -2.8678645 | -3.1954649 |

|    |   |            |            |            |
|----|---|------------|------------|------------|
| 59 | H | -2.8684960 | 2.8678597  | -3.1954653 |
| 60 | C | 4.0750318  | -4.0745835 | -0.8066773 |
| 61 | H | 4.6037043  | -4.6032000 | -1.6116102 |
| 62 | C | 2.6910735  | -2.6908099 | 1.3222639  |
| 63 | H | 2.1697999  | -2.1696231 | 2.1358164  |
| 64 | H | 5.0985829  | -5.0982899 | 0.7968920  |
| 65 | C | 4.3427335  | -4.3424070 | 0.5413259  |
| 66 | H | 3.9097122  | -3.9095752 | 2.6294821  |
| 67 | C | 3.6623304  | -3.6620941 | 1.5875486  |
| 68 | C | -4.0750324 | 4.0745827  | -0.8066782 |
| 69 | H | -4.6037058 | 4.6031981  | -1.6116112 |
| 70 | C | -2.6910717 | 2.6908120  | 1.3222633  |
| 71 | H | -2.1697975 | 2.1696260  | 2.1358161  |
| 72 | H | -3.9097083 | 3.9095796  | 2.6294812  |
| 73 | C | -3.6623278 | 3.6620970  | 1.5875478  |
| 74 | H | -5.0985810 | 5.0982919  | 0.7968909  |
| 75 | C | -4.3427320 | 4.3424084  | 0.5413249  |

$[\text{Fe}(\text{bimpy})_2]^{2+}$ , low-spin

|    |    |            |            |            |
|----|----|------------|------------|------------|
| 1  | Fe | -0.0000005 | 0.0000007  | -0.0000002 |
| 2  | N  | -0.0000002 | 0.0000001  | 1.9196186  |
| 3  | C  | -0.8391322 | -0.8391321 | 2.6004315  |
| 4  | C  | -0.8617694 | -0.8617693 | 4.0091715  |
| 5  | C  | -0.0000001 | -0.0000001 | 4.7125966  |
| 6  | H  | -0.0000001 | -0.0000001 | 5.8112137  |
| 7  | C  | 0.8617691  | 0.8617692  | 4.0091716  |
| 8  | H  | 1.5374997  | 1.5374998  | 4.5506894  |
| 9  | C  | 0.8391319  | 0.8391321  | 2.6004316  |
| 10 | C  | -1.6145218 | -1.6145213 | 1.6499321  |
| 11 | N  | -1.3972745 | -1.3972735 | 0.3334279  |
| 12 | C  | -2.2527713 | -2.2527707 | -0.3544993 |
| 13 | C  | -3.0056680 | -3.0056675 | 0.6041210  |
| 14 | N  | -2.5714650 | -2.5714645 | 1.8499261  |
| 15 | C  | 1.6145212  | 1.6145216  | 1.6499322  |
| 16 | N  | 1.3972733  | 1.3972743  | 0.3334280  |
| 17 | C  | 2.2527707  | 2.2527712  | -0.3544990 |
| 18 | C  | 3.0056675  | 3.0056678  | 0.6041214  |
| 19 | N  | 2.5714643  | 2.5714648  | 1.8499263  |
| 20 | N  | 0.0000000  | 0.0000001  | -1.9196187 |
| 21 | C  | 0.8391320  | -0.8391321 | -2.6004317 |
| 22 | C  | 0.8617689  | -0.8617695 | -4.0091717 |
| 23 | H  | 1.5374993  | -1.5375002 | -4.5506895 |
| 24 | C  | -0.0000006 | -0.0000004 | -4.7125967 |
| 25 | H  | -0.0000010 | -0.0000005 | -5.8112137 |
| 26 | C  | -0.8617697 | 0.8617690  | -4.0091716 |
| 27 | C  | -0.8391321 | 0.8391320  | -2.6004317 |
| 28 | C  | 1.6145215  | -1.6145214 | -1.6499324 |
| 29 | N  | 1.3972741  | -1.3972737 | -0.3334282 |
| 30 | C  | 2.2527712  | -2.2527705 | 0.3544991  |
| 31 | C  | 3.0056678  | -3.0056675 | -0.6041212 |
| 32 | N  | 2.5714646  | -2.5714647 | -1.8499263 |
| 33 | C  | -1.6145213 | 1.6145213  | -1.6499320 |
| 34 | N  | -1.3972732 | 1.3972734  | -0.3334279 |
| 35 | C  | -2.2527703 | 2.2527707  | 0.3544990  |
| 36 | C  | -3.0056673 | 3.0056674  | -0.6041212 |
| 37 | N  | -2.5714646 | 2.5714643  | -1.8499261 |
| 38 | H  | -1.5374999 | -1.5374999 | 4.5506893  |
| 39 | H  | -1.5375005 | 1.5374994  | -4.5506893 |
| 40 | H  | 4.5349063  | 4.5349063  | 0.9767778  |
| 41 | C  | 3.9644809  | 3.9644809  | 0.2310524  |
| 42 | C  | 2.4666888  | 2.4666888  | -1.7350923 |
| 43 | H  | 1.9060618  | 1.9060617  | -2.4918610 |

|    |   |            |            |            |
|----|---|------------|------------|------------|
| 44 | H | 4.8967454  | 4.8967446  | -1.4808159 |
| 45 | C | 4.1576051  | 4.1576047  | -1.1413286 |
| 46 | C | 3.4200906  | 3.4200901  | -2.1068373 |
| 47 | H | 3.6071864  | 3.6071855  | -3.1736219 |
| 48 | H | -1.9060617 | -1.9060616 | -2.4918613 |
| 49 | C | -2.4666888 | -2.4666886 | -1.7350927 |
| 50 | C | -3.9644810 | -3.9644808 | 0.2310519  |
| 51 | H | -4.5349065 | -4.5349063 | 0.9767772  |
| 52 | C | -4.1576049 | -4.1576049 | -1.1413291 |
| 53 | H | -4.8967448 | -4.8967452 | -1.4808165 |
| 54 | H | -3.6071856 | -3.6071861 | -3.1736224 |
| 55 | C | -3.4200902 | -3.4200903 | -2.1068378 |
| 56 | H | -2.9088870 | -2.9088865 | 2.7515062  |
| 57 | H | 2.9088863  | 2.9088868  | 2.7515065  |
| 58 | H | 2.9088865  | -2.9088868 | -2.7515064 |
| 59 | H | -2.9088867 | 2.9088863  | -2.7515062 |
| 60 | C | 3.9644809  | -3.9644806 | -0.2310521 |
| 61 | H | 4.5349063  | -4.5349063 | -0.9767773 |
| 62 | C | 2.4666890  | -2.4666883 | 1.7350925  |
| 63 | H | 1.9060620  | -1.9060610 | 2.4918611  |
| 64 | H | 4.8967451  | -4.8967446 | 1.4808164  |
| 65 | C | 4.1576050  | -4.1576045 | 1.1413290  |
| 66 | H | 3.6071861  | -3.6071852 | 3.1736223  |
| 67 | C | 3.4200905  | -3.4200898 | 2.1068376  |
| 68 | C | -3.9644805 | 3.9644805  | -0.2310520 |
| 69 | H | -4.5349062 | 4.5349059  | -0.9767773 |
| 70 | C | -2.4666880 | 2.4666886  | 1.7350925  |
| 71 | H | -1.9060608 | 1.9060617  | 2.4918611  |
| 72 | H | -3.6071850 | 3.6071857  | 3.1736222  |
| 73 | C | -3.4200895 | 3.4200901  | 2.1068376  |
| 74 | H | -4.8967445 | 4.8967446  | 1.4808164  |
| 75 | C | -4.1576044 | 4.1576046  | 1.1413290  |

[Fe(terpy)<sub>2</sub>]<sup>2+</sup>, high-spin

|    |    |            |            |            |
|----|----|------------|------------|------------|
| 1  | Fe | -0.0000001 | 0.0000001  | 0.0120580  |
| 2  | N  | -0.0000001 | -0.0000001 | 2.1242061  |
| 3  | C  | 0.8363594  | 0.8361441  | 2.8019652  |
| 4  | C  | 0.8570990  | 0.8568516  | 4.2110838  |
| 5  | C  | -0.0000001 | 0.0000001  | 4.9194277  |
| 6  | H  | -0.0000001 | 0.0000002  | 6.0180873  |
| 7  | C  | -0.8570991 | -0.8568514 | 4.2110839  |
| 8  | H  | -1.5309227 | -1.5304830 | 4.7550087  |
| 9  | C  | -0.8363595 | -0.8361441 | 2.8019652  |
| 10 | C  | 1.6867715  | 1.6864646  | 1.9315400  |
| 11 | N  | 1.5035698  | 1.5033920  | 0.5901674  |
| 12 | C  | 2.2312810  | 2.2311948  | -0.2840398 |
| 13 | C  | 2.6243265  | 2.6239355  | 2.4130746  |
| 14 | C  | -1.6867715 | -1.6864646 | 1.9315400  |
| 15 | N  | -1.5035699 | -1.5033919 | 0.5901674  |
| 16 | C  | -2.2312810 | -2.2311947 | -0.2840398 |
| 17 | C  | -2.6243265 | -2.6239355 | 2.4130745  |
| 18 | N  | -0.0000001 | 0.0000000  | -2.1313071 |
| 19 | C  | -0.8382030 | 0.8379624  | -2.7904052 |
| 20 | C  | -0.8600154 | 0.8597339  | -4.2009844 |
| 21 | H  | -1.5311615 | 1.5306657  | -4.7510469 |
| 22 | C  | 0.0000000  | -0.0000001 | -4.9026483 |
| 23 | H  | 0.0000001  | -0.0000001 | -6.0018848 |
| 24 | C  | 0.8600154  | -0.8597340 | -4.2009843 |
| 25 | C  | 0.8382028  | -0.8379624 | -2.7904052 |
| 26 | C  | -1.6954279 | 1.6950994  | -1.9148893 |
| 27 | N  | -1.5237562 | 1.5235615  | -0.5725098 |
| 28 | C  | -2.2566834 | 2.2565903  | 0.2869163  |

|    |   |            |            |            |
|----|---|------------|------------|------------|
| 29 | C | -3.2035586 | 3.2034464  | -0.1364533 |
| 30 | C | 1.6954278  | -1.6950994 | -1.9148893 |
| 31 | N | 1.5237561  | -1.5235614 | -0.5725098 |
| 32 | C | 2.2566834  | -2.2565902 | 0.2869163  |
| 33 | C | 3.2035587  | -3.2034464 | -0.1364536 |
| 34 | H | 1.5309225  | 1.5304832  | 4.7550087  |
| 35 | H | 1.5311615  | -1.5306658 | -4.7510468 |
| 36 | H | -2.0440351 | -2.0440310 | -1.3527606 |
| 37 | H | 2.0440351  | 2.0440311  | -1.3527606 |
| 38 | H | 2.7681223  | 2.7676182  | 3.4914367  |
| 39 | H | -2.7681222 | -2.7676182 | 3.4914367  |
| 40 | C | 3.3771889  | 3.3768864  | 1.5009977  |
| 41 | H | 4.1112465  | 4.1108752  | 1.8629350  |
| 42 | H | 3.7479630  | 3.7479086  | -0.6254021 |
| 43 | C | 3.1794219  | 3.1792996  | 0.1229601  |
| 44 | C | -3.3771889 | -3.3768864 | 1.5009976  |
| 45 | H | -4.1112465 | -4.1108753 | 1.8629348  |
| 46 | H | -3.7479629 | -3.7479086 | -0.6254022 |
| 47 | C | -3.1794219 | -3.1792996 | 0.1229600  |
| 48 | C | 3.3889943  | -3.3887038 | -1.5153193 |
| 49 | C | -3.3889940 | 3.3887036  | -1.5153191 |
| 50 | C | 2.6267707  | -2.6263738 | -2.4156579 |
| 51 | C | -2.6267705 | 2.6263737  | -2.4156579 |
| 52 | H | 3.7786612  | -3.7786281 | 0.6020058  |
| 53 | H | 2.0755334  | -2.0755209 | 1.3576084  |
| 54 | H | 4.1195594  | -4.1192163 | -1.8912752 |
| 55 | H | 2.7632820  | -2.7627758 | -3.4959253 |
| 56 | H | -2.0755334 | 2.0755208  | 1.3576084  |
| 57 | H | -3.7786610 | 3.7786281  | 0.6020061  |
| 58 | H | -4.1195591 | 4.1192162  | -1.8912749 |
| 59 | H | -2.7632820 | 2.7627758  | -3.4959252 |

[Fe(terpy)<sub>2</sub>]<sup>2+</sup>, low-spin

|    |    |            |            |            |
|----|----|------------|------------|------------|
| 1  | Fe | 0.0000000  | 0.0000001  | 0.0000000  |
| 2  | N  | 0.0000000  | 0.0000000  | 1.8962563  |
| 3  | C  | 0.8423658  | 0.8423658  | 2.5658139  |
| 4  | C  | 0.8605570  | 0.8605569  | 3.9729797  |
| 5  | C  | 0.0000001  | -0.0000001 | 4.6772647  |
| 6  | H  | 0.0000001  | -0.0000001 | 5.7759632  |
| 7  | C  | -0.8605570 | -0.8605570 | 3.9729797  |
| 8  | H  | -1.5355081 | -1.5355082 | 4.5147087  |
| 9  | C  | -0.8423658 | -0.8423658 | 2.5658139  |
| 10 | C  | 1.6531518  | 1.6531518  | 1.6413260  |
| 11 | N  | 1.3930011  | 1.3930011  | 0.3130839  |
| 12 | C  | 2.0804896  | 2.0804896  | -0.6290354 |
| 13 | C  | 2.6101927  | 2.6101927  | 2.0275347  |
| 14 | C  | -1.6531518 | -1.6531518 | 1.6413260  |
| 15 | N  | -1.3930011 | -1.3930011 | 0.3130839  |
| 16 | C  | -2.0804896 | -2.0804896 | -0.6290354 |
| 17 | C  | -2.6101927 | -2.6101927 | 2.0275346  |
| 18 | N  | 0.0000000  | -0.0000001 | -1.8962563 |
| 19 | C  | -0.8423659 | 0.8423658  | -2.5658139 |
| 20 | C  | -0.8605571 | 0.8605569  | -3.9729797 |
| 21 | H  | -1.5355082 | 1.5355080  | -4.5147087 |
| 22 | C  | -0.0000001 | -0.0000001 | -4.6772647 |
| 23 | H  | -0.0000002 | -0.0000001 | -5.7759632 |
| 24 | C  | 0.8605569  | -0.8605570 | -3.9729797 |
| 25 | C  | 0.8423658  | -0.8423659 | -2.5658139 |
| 26 | C  | -1.6531518 | 1.6531518  | -1.6413260 |
| 27 | N  | -1.3930011 | 1.3930011  | -0.3130839 |
| 28 | C  | -2.0804897 | 2.0804897  | 0.6290354  |
| 29 | C  | -3.0451676 | 3.0451677  | 0.3079319  |

|    |   |            |            |            |
|----|---|------------|------------|------------|
| 30 | C | 1.6531518  | -1.6531518 | -1.6413259 |
| 31 | N | 1.3930011  | -1.3930011 | -0.3130838 |
| 32 | C | 2.0804896  | -2.0804896 | 0.6290355  |
| 33 | C | 3.0451677  | -3.0451676 | 0.3079321  |
| 34 | H | 1.5355081  | 1.5355080  | 4.5147087  |
| 35 | H | 1.5355080  | -1.5355082 | -4.5147087 |
| 36 | H | -1.8474583 | -1.8474583 | -1.6766599 |
| 37 | H | 1.8474583  | 1.8474584  | -1.6766598 |
| 38 | H | 2.8005573  | 2.8005572  | 3.0919377  |
| 39 | H | -2.8005572 | -2.8005573 | 3.0919376  |
| 40 | C | 3.3163531  | 3.3163531  | 1.0436945  |
| 41 | H | 4.0670933  | 4.0670932  | 1.3277464  |
| 42 | H | 3.5729268  | 3.5729267  | -1.1140432 |
| 43 | C | 3.0451676  | 3.0451676  | -0.3079319 |
| 44 | C | -3.3163531 | -3.3163531 | 1.0436944  |
| 45 | H | -4.0670932 | -4.0670933 | 1.3277462  |
| 46 | H | -3.5729267 | -3.5729267 | -1.1140434 |
| 47 | C | -3.0451676 | -3.0451676 | -0.3079321 |
| 48 | C | 3.3163532  | -3.3163531 | -1.0436944 |
| 49 | C | -3.3163531 | 3.3163532  | -1.0436945 |
| 50 | C | 2.6101927  | -2.6101927 | -2.0275346 |
| 51 | C | -2.6101928 | 2.6101928  | -2.0275347 |
| 52 | H | 3.5729268  | -3.5729267 | 1.1140433  |
| 53 | H | 1.8474584  | -1.8474583 | 1.6766599  |
| 54 | H | 4.0670934  | -4.0670932 | -1.3277463 |
| 55 | H | 2.8005573  | -2.8005573 | -3.0919376 |
| 56 | H | -1.8474584 | 1.8474585  | 1.6766598  |
| 57 | H | -3.5729268 | 3.5729269  | 1.1140432  |
| 58 | H | -4.0670932 | 4.0670934  | -1.3277464 |
| 59 | H | -2.8005573 | 2.8005572  | -3.0919377 |

$[\text{Fe}(\text{L}^1\text{H})(\text{bimpy})]^{2+}$ , high-spin

|    |    |            |            |            |
|----|----|------------|------------|------------|
| 1  | Fe | 0.0003589  | -0.0014698 | 0.1339029  |
| 2  | N  | 0.0103445  | 0.0038650  | 2.3192921  |
| 3  | C  | -1.1643113 | -0.0610134 | 2.9902754  |
| 4  | C  | -1.1975400 | -0.0619900 | 4.4013717  |
| 5  | C  | 0.0221705  | 0.0161888  | 5.0955243  |
| 6  | H  | 0.0268325  | 0.0212256  | 6.1946791  |
| 7  | C  | 1.2358926  | 0.0880804  | 4.3903669  |
| 8  | H  | 2.1866363  | 0.1521166  | 4.9366291  |
| 9  | C  | 1.1906436  | 0.0744574  | 2.9796260  |
| 10 | C  | -2.3156291 | -0.1217884 | 2.0818183  |
| 11 | N  | -2.1367470 | -0.1033410 | 0.7486835  |
| 12 | C  | -3.4034409 | -0.1544110 | 0.1849709  |
| 13 | C  | -4.3779422 | -0.2171098 | 1.2313650  |
| 14 | N  | -3.6439158 | -0.1957627 | 2.4116034  |
| 15 | C  | 2.3340923  | 0.1277953  | 2.0609277  |
| 16 | N  | 2.1437933  | 0.1016271  | 0.7295098  |
| 17 | C  | 3.4058160  | 0.1455750  | 0.1547609  |
| 18 | C  | 4.3893047  | 0.2129881  | 1.1924589  |
| 19 | N  | 3.6652972  | 0.2014384  | 2.3789788  |
| 20 | N  | -0.0088193 | 0.0018094  | -1.9927284 |
| 21 | C  | -0.0620094 | -1.1673824 | -2.6785356 |
| 22 | C  | -0.0741753 | -1.2123611 | -4.0840075 |
| 23 | H  | -0.1211949 | -2.1779222 | -4.6055641 |
| 24 | C  | -0.0213492 | 0.0052344  | -4.7900498 |
| 25 | H  | -0.0262048 | 0.0065719  | -5.8888924 |
| 26 | C  | 0.0375778  | 1.2210991  | -4.0815291 |
| 27 | C  | 0.0380331  | 1.1726831  | -2.6761084 |
| 28 | C  | -0.0939155 | -2.3206997 | -1.7629906 |
| 29 | N  | -0.0343447 | -2.1374318 | -0.4707918 |
| 30 | C  | -0.1051896 | -3.4730371 | 0.1547929  |

|    |   |            |            |            |
|----|---|------------|------------|------------|
| 31 | C | -0.1570190 | -4.4532220 | -1.0551188 |
| 32 | O | -0.1813775 | -3.5636986 | -2.2307626 |
| 33 | C | 0.0777421  | 2.3236962  | -1.7579352 |
| 34 | N | 0.0296168  | 2.1369499  | -0.4658134 |
| 35 | C | 0.1033793  | 3.4708945  | 0.1627391  |
| 36 | C | 0.1485502  | 4.4542787  | -1.0449273 |
| 37 | O | 0.1602874  | 3.5679960  | -2.2231777 |
| 38 | H | -2.1435128 | -0.1206325 | 4.9564774  |
| 39 | H | 0.0797202  | 2.1879740  | -4.6010547 |
| 40 | H | 0.7369280  | -5.0978031 | -1.1497947 |
| 41 | H | -1.0655189 | -5.0818626 | -1.0980371 |
| 42 | H | -0.7437675 | 5.1022916  | -1.1306125 |
| 43 | H | 1.0589508  | 5.0798181  | -1.0934795 |
| 44 | H | 1.0053262  | 3.5394406  | 0.8056180  |
| 45 | H | -1.0039415 | -3.5427914 | 0.8020362  |
| 46 | H | 6.5187047  | 0.3234132  | 1.7272840  |
| 47 | C | 5.7694908  | 0.2741168  | 0.9254339  |
| 48 | C | 3.8070091  | 0.1380221  | -1.1996965 |
| 49 | H | 3.0658667  | 0.0855885  | -2.0077434 |
| 50 | H | 7.2088290  | 0.3112663  | -0.6846937 |
| 51 | C | 6.1421095  | 0.2655129  | -0.4236941 |
| 52 | C | 5.1778025  | 0.1988417  | -1.4678815 |
| 53 | H | 5.5262309  | 0.1950880  | -2.5103238 |
| 54 | H | -3.0817360 | -0.1080511 | -1.9806551 |
| 55 | C | -3.8159614 | -0.1569929 | -1.1660701 |
| 56 | C | -5.7601624 | -0.2835412 | 0.9763490  |
| 57 | H | -6.5024784 | -0.3294023 | 1.7847939  |
| 58 | C | -6.1441399 | -0.2850224 | -0.3696261 |
| 59 | H | -7.2129100 | -0.3352275 | -0.6212378 |
| 60 | H | -5.5459337 | -0.2268491 | -2.4618309 |
| 61 | C | -5.1888222 | -0.2229434 | -1.4223402 |
| 62 | H | -4.0359088 | -0.2228157 | 3.3536696  |
| 63 | H | 4.0652222  | 0.2329251  | 3.3175581  |
| 64 | H | -0.7783475 | 3.6378004  | 0.8135432  |
| 65 | H | 0.7797068  | -3.6420938 | 0.8006643  |

[Fe(L<sup>1</sup>H)(bimpy)]<sup>2+</sup>, low-spin

|    |    |            |            |            |
|----|----|------------|------------|------------|
| 1  | Fe | -0.0018498 | -0.0000804 | 0.2216461  |
| 2  | N  | -0.0103550 | -0.0004372 | 2.1486370  |
| 3  | C  | 1.1728038  | -0.0055388 | 2.8347670  |
| 4  | C  | 1.1987702  | -0.0076215 | 4.2434134  |
| 5  | C  | -0.0225635 | -0.0008508 | 4.9405172  |
| 6  | H  | -0.0273603 | -0.0009737 | 6.0391220  |
| 7  | C  | -1.2377511 | 0.0061016  | 4.2327676  |
| 8  | H  | -2.1944797 | 0.0127178  | 4.7721581  |
| 9  | C  | -1.1994377 | 0.0043913  | 2.8243486  |
| 10 | C  | 2.2755839  | -0.0055093 | 1.8908008  |
| 11 | N  | 1.9771222  | -0.0001771 | 0.5715132  |
| 12 | C  | 3.1932227  | -0.0006228 | -0.1084277 |
| 13 | C  | 4.2507693  | -0.0063100 | 0.8586185  |
| 14 | N  | 3.6269529  | -0.0098223 | 2.1000124  |
| 15 | C  | -2.2938038 | 0.0050731  | 1.8705886  |
| 16 | N  | -1.9841878 | 0.0003445  | 0.5538310  |
| 17 | C  | -3.1946014 | 0.0009509  | -0.1362267 |
| 18 | C  | -4.2602120 | 0.0067045  | 0.8219705  |
| 19 | N  | -3.6468549 | 0.0099801  | 2.0684918  |
| 20 | N  | 0.0095810  | 0.0000620  | -1.6872933 |
| 21 | C  | 0.0184736  | 1.1818327  | -2.3691183 |
| 22 | C  | 0.0290335  | 1.2217661  | -3.7739355 |
| 23 | H  | 0.0372724  | 2.1879555  | -4.2959050 |
| 24 | C  | 0.0288997  | 0.0002366  | -4.4772346 |
| 25 | H  | 0.0366519  | 0.0003088  | -5.5760377 |

|    |   |            |            |            |
|----|---|------------|------------|------------|
| 26 | C | 0.0191118  | -1.2213825 | -3.7741715 |
| 27 | C | 0.0099022  | -1.1816276 | -2.3693437 |
| 28 | C | 0.0122789  | 2.2777093  | -1.4015662 |
| 29 | N | -0.0017968 | 1.9603170  | -0.1269874 |
| 30 | C | 0.0092996  | 3.2217252  | 0.6395644  |
| 31 | C | -0.0258372 | 4.3182529  | -0.4677326 |
| 32 | O | 0.0206610  | 3.5631801  | -1.7351527 |
| 33 | C | 0.0035630  | -2.2776793 | -1.4019700 |
| 34 | N | 0.0017367  | -1.9605213 | -0.1272563 |
| 35 | C | -0.0179690 | -3.2220192 | 0.6389605  |
| 36 | C | 0.0265842  | -4.3185010 | -0.4680517 |
| 37 | O | -0.0005881 | -3.5630811 | -1.7358466 |
| 38 | H | 2.1507084  | -0.0143326 | 4.7912380  |
| 39 | H | 0.0186383  | -2.1875041 | -4.2963300 |
| 40 | H | -0.9575187 | 4.9142346  | -0.4768530 |
| 41 | H | 0.8443029  | 4.9997682  | -0.4583249 |
| 42 | H | 0.9556082  | -4.9186433 | -0.4653650 |
| 43 | H | -0.8466287 | -4.9961857 | -0.4699376 |
| 44 | H | -0.9362927 | -3.2780360 | 1.2584540  |
| 45 | H | 0.9218085  | 3.2782650  | 1.2676091  |
| 46 | H | -6.4229836 | 0.0131999  | 1.1953432  |
| 47 | C | -5.6162173 | 0.0089731  | 0.4496624  |
| 48 | C | -3.4975676 | -0.0021269 | -1.5171444 |
| 49 | H | -2.7068561 | -0.0060669 | -2.2759661 |
| 50 | H | -6.9339491 | 0.0066775  | -1.2627602 |
| 51 | C | -5.8888585 | 0.0053151  | -0.9227007 |
| 52 | C | -4.8457281 | 0.0000023  | -1.8880759 |
| 53 | H | -5.1105021 | -0.0023714 | -2.9548017 |
| 54 | H | 2.7227037  | 0.0066667  | -2.2518233 |
| 55 | C | 3.5073656  | 0.0026730  | -1.4867777 |
| 56 | C | 5.6098151  | -0.0083396 | 0.4973371  |
| 57 | H | 6.4104674  | -0.0125351 | 1.2495722  |
| 58 | C | 5.8936263  | -0.0044722 | -0.8727515 |
| 59 | H | 6.9414665  | -0.0055995 | -1.2042745 |
| 60 | H | 5.1320632  | 0.0034467  | -2.9112010 |
| 61 | C | 4.8585122  | 0.0008199  | -1.8466955 |
| 62 | H | 4.0975431  | -0.0094669 | 3.0054521  |
| 63 | H | -4.1251441 | 0.0096303  | 2.9698868  |
| 64 | H | 0.8527595  | -3.2736134 | 1.3226592  |
| 65 | H | -0.8677686 | 3.2727669  | 1.3150973  |

$[\text{Fe}(\text{L}^2\text{H})(\text{bimpy})]^{2+}$ , high-spin

|    |    |            |            |            |
|----|----|------------|------------|------------|
| 1  | Fe | -0.0010424 | -0.0003122 | 0.0541279  |
| 2  | N  | -0.0077112 | 0.0006882  | 2.2551082  |
| 3  | C  | 1.1698120  | -0.0325074 | 2.9220857  |
| 4  | C  | 1.2056857  | -0.0336641 | 4.3334794  |
| 5  | C  | -0.0152552 | 0.0037011  | 5.0290568  |
| 6  | H  | -0.0182208 | 0.0049312  | 6.1283095  |
| 7  | C  | -1.2324136 | 0.0392777  | 4.3268058  |
| 8  | H  | -2.1835131 | 0.0703175  | 4.8752789  |
| 9  | C  | -1.1888421 | 0.0350046  | 2.9156184  |
| 10 | C  | 2.3202695  | -0.0646525 | 2.0104476  |
| 11 | N  | 2.1382197  | -0.0675641 | 0.6775468  |
| 12 | C  | 3.4049804  | -0.0898732 | 0.1122621  |
| 13 | C  | 4.3831086  | -0.1044254 | 1.1573677  |
| 14 | N  | 3.6509259  | -0.0885538 | 2.3386136  |
| 15 | C  | -2.3342348 | 0.0631607  | 1.9975702  |
| 16 | N  | -2.1446819 | 0.0623490  | 0.6657579  |
| 17 | C  | -3.4080276 | 0.0841928  | 0.0929654  |
| 18 | C  | -4.3921900 | 0.0993527  | 1.1323556  |
| 19 | N  | -3.6668449 | 0.0855344  | 2.3179513  |
| 20 | N  | 0.0101407  | 0.0026909  | -2.0506639 |



|    |   |            |            |            |
|----|---|------------|------------|------------|
| 21 | C | 0.0166802  | 1.1803632  | -2.7310121 |
| 22 | C | 0.0350535  | 1.2202874  | -4.1379324 |
| 23 | H | 0.0547050  | 2.1831148  | -4.6678640 |
| 24 | C | 0.0312731  | 0.0059589  | -4.8486288 |
| 25 | H | 0.0398328  | 0.0072521  | -5.9472346 |
| 26 | C | 0.0166119  | -1.2100113 | -4.1409493 |
| 27 | C | 0.0133869  | -1.1733953 | -2.7338175 |
| 28 | C | 0.0141832  | 2.3441557  | -1.8243679 |
| 29 | N | 0.0297597  | 2.1230767  | -0.5321894 |
| 30 | C | -0.0772765 | 3.3627649  | 0.2508478  |
| 31 | C | 0.3146038  | 4.5627249  | -0.6419327 |
| 32 | S | -0.0318150 | 4.0098545  | -2.3779478 |
| 33 | C | 0.0017721  | -2.3393469 | -1.8301208 |
| 34 | N | -0.0299717 | -2.1213766 | -0.5376948 |
| 35 | C | 0.0632693  | -3.3632037 | 0.2436333  |
| 36 | C | -0.3213038 | -4.5595841 | -0.6570456 |
| 37 | S | 0.0503018  | -4.0038559 | -2.3871052 |
| 38 | H | 2.1536956  | -0.0638121 | 4.8873427  |
| 39 | H | 0.0056101  | -2.1716016 | -4.6733719 |
| 40 | H | -0.2762280 | 5.4727372  | -0.4322780 |
| 41 | H | 1.3918270  | 4.8112520  | -0.5789788 |
| 42 | H | 0.2630193  | -5.4724560 | -0.4416290 |
| 43 | H | -1.4002487 | -4.8039708 | -0.6091389 |
| 44 | H | -0.5987446 | -3.3075192 | 1.1304629  |
| 45 | H | 0.5735833  | 3.3069345  | 1.1458732  |
| 46 | H | -6.5238077 | 0.1335755  | 1.6695140  |
| 47 | C | -5.7739134 | 0.1228160  | 0.8668600  |
| 48 | C | -3.8091994 | 0.0930365  | -1.2614116 |
| 49 | H | -3.0662662 | 0.0818862  | -2.0692841 |
| 50 | H | -7.2143675 | 0.1486846  | -0.7422312 |
| 51 | C | -6.1465638 | 0.1307326  | -0.4821428 |
| 52 | C | -5.1812553 | 0.1163198  | -1.5278115 |
| 53 | H | -5.5303078 | 0.1237576  | -2.5700173 |
| 54 | H | 3.0762517  | -0.0898985 | -2.0521214 |
| 55 | C | 3.8142110  | -0.1003817 | -1.2397142 |
| 56 | C | 5.7663576  | -0.1290593 | 0.8999878  |
| 57 | H | 6.5115085  | -0.1393454 | 1.7070572  |
| 58 | C | 6.1469548  | -0.1386999 | -0.4467656 |
| 59 | H | 7.2162607  | -0.1577032 | -0.7005207 |
| 60 | H | 5.5428520  | -0.1338381 | -2.5382181 |
| 61 | C | 5.1877921  | -0.1248606 | -1.4980637 |
| 62 | H | 4.0452849  | -0.0927779 | 3.2801073  |
| 63 | H | -4.0665593 | 0.0905560  | 3.2571757  |
| 64 | H | 1.1077246  | -3.4569309 | 0.6172917  |
| 65 | H | -1.1267028 | 3.4521391  | 0.6113431  |

[Fe(L<sup>2</sup>H)(bimpy)]<sup>2+</sup>, low-spin

|    |    |            |            |            |
|----|----|------------|------------|------------|
| 1  | Fe | 0.0014850  | -0.0000840 | 0.1517768  |
| 2  | N  | 0.0071905  | 0.0017187  | 2.0818411  |
| 3  | C  | -1.1770316 | 0.0283128  | 2.7666321  |
| 4  | C  | -1.2047442 | 0.0302999  | 4.1753560  |
| 5  | C  | 0.0154111  | 0.0031280  | 4.8742280  |
| 6  | H  | 0.0186392  | 0.0036456  | 5.9728369  |
| 7  | C  | 1.2314283  | -0.0247086 | 4.1682244  |
| 8  | H  | 2.1869863  | -0.0477370 | 4.7092875  |
| 9  | C  | 1.1954230  | -0.0241581 | 2.7596452  |
| 10 | C  | -2.2783416 | 0.0530395  | 1.8213780  |
| 11 | N  | -1.9786785 | 0.0529009  | 0.5022844  |
| 12 | C  | -3.1933248 | 0.0739146  | -0.1797038 |
| 13 | C  | -4.2518681 | 0.0881524  | 0.7862117  |
| 14 | N  | -3.6298130 | 0.0759606  | 2.0285730  |
| 15 | C  | 2.2910486  | -0.0500595 | 1.8078167  |

|    |   |            |            |            |
|----|---|------------|------------|------------|
| 16 | N | 1.9837672  | -0.0516918 | 0.4904426  |
| 17 | C | 3.1945057  | -0.0731383 | -0.1984422 |
| 18 | C | 4.2585791  | -0.0858437 | 0.7614192  |
| 19 | N | 3.6436897  | -0.0723326 | 2.0072901  |
| 20 | N | -0.0068318 | -0.0021715 | -1.7418385 |
| 21 | C | -0.0462481 | -1.1907122 | -2.4150681 |
| 22 | C | -0.0627116 | -1.2239164 | -3.8218864 |
| 23 | H | -0.1055606 | -2.1845323 | -4.3535742 |
| 24 | C | -0.0249155 | -0.0050696 | -4.5262408 |
| 25 | H | -0.0322022 | -0.0061990 | -5.6249710 |
| 26 | C | 0.0218653  | 1.2152493  | -3.8249585 |
| 27 | C | 0.0237936  | 1.1849749  | -2.4179935 |
| 28 | C | -0.0715405 | -2.2969770 | -1.4559483 |
| 29 | N | -0.0548829 | -1.9523146 | -0.1810317 |
| 30 | C | 0.0495285  | -3.1191679 | 0.7108290  |
| 31 | C | -0.4353533 | -4.3650059 | -0.0563352 |
| 32 | S | -0.0933328 | -4.0029729 | -1.8480158 |
| 33 | C | 0.0596997  | 2.2932882  | -1.4615688 |
| 34 | N | 0.0554534  | 1.9514191  | -0.1858042 |
| 35 | C | -0.0391848 | 3.1203613  | 0.7044254  |
| 36 | C | 0.4394431  | 4.3639640  | -0.0702385 |
| 37 | S | 0.0790471  | 3.9984451  | -1.8574965 |
| 38 | H | -2.1570810 | 0.0538544  | 4.7220630  |
| 39 | H | 0.0570414  | 2.1747611  | -4.3592005 |
| 40 | H | 0.1019124  | -5.2872830 | 0.2296039  |
| 41 | H | -1.5249234 | -4.5339633 | 0.0466016  |
| 42 | H | -0.0937454 | 5.2875493  | 0.2191016  |
| 43 | H | 1.5302123  | 4.5317293  | 0.0213629  |
| 44 | H | 0.5646575  | 2.9592732  | 1.6185511  |
| 45 | H | -0.5457784 | -2.9565477 | 1.6302636  |
| 46 | H | 6.4207456  | -0.1148726 | 1.1376228  |
| 47 | C | 5.6149702  | -0.1058217 | 0.3909291  |
| 48 | C | 3.4986146  | -0.0822479 | -1.5789159 |
| 49 | H | 2.7082698  | -0.0749744 | -2.3379695 |
| 50 | H | 6.9343861  | -0.1272075 | -1.3199226 |
| 51 | C | 5.8889893  | -0.1126190 | -0.9810814 |
| 52 | C | 4.8470016  | -0.1014345 | -1.9478561 |
| 53 | H | 5.1131717  | -0.1083135 | -3.0142035 |
| 54 | H | -2.7190896 | 0.0731913  | -2.3218664 |
| 55 | C | -3.5051768 | 0.0815356  | -1.5584284 |
| 56 | C | -5.6103508 | 0.1081962  | 0.4233125  |
| 57 | H | -6.4118939 | 0.1184219  | 1.1745269  |
| 58 | C | -5.8920862 | 0.1134817  | -0.9471282 |
| 59 | H | -6.9393707 | 0.1280821  | -1.2801033 |
| 60 | H | -5.1278400 | 0.1065599  | -2.9846061 |
| 61 | C | -4.8556222 | 0.1007918  | -1.9197796 |
| 62 | H | -4.1017893 | 0.0805422  | 2.9332734  |
| 63 | H | 4.1209464  | -0.0755510 | 2.9092208  |
| 64 | H | -1.1016780 | 3.2256890  | 1.0194531  |
| 65 | H | 1.1150888  | -3.2228047 | 1.0157934  |

$[\text{Fe}(\text{L}^1\text{H})(\text{bpp})]^{2+}$ , high-spin

|    |    |            |            |            |
|----|----|------------|------------|------------|
| 1  | Fe | 0.0000386  | -0.0059329 | -0.1017630 |
| 2  | N  | 0.0097020  | 0.0017227  | 2.0703456  |
| 3  | C  | -1.1553095 | 0.0064047  | 2.7458876  |
| 4  | C  | -1.2061569 | 0.0156257  | 4.1502781  |
| 5  | C  | 0.0210544  | 0.0164254  | 4.8356799  |
| 6  | H  | 0.0255422  | 0.0223366  | 5.9349772  |
| 7  | C  | 1.2425908  | 0.0100309  | 4.1402767  |
| 8  | H  | 2.1950617  | 0.0105118  | 4.6834845  |
| 9  | C  | 1.1801845  | 0.0042153  | 2.7362986  |
| 10 | N  | -2.2974488 | 0.0008085  | 1.9099744  |

|    |   |            |            |            |
|----|---|------------|------------|------------|
| 11 | N | -2.1199162 | -0.0106011 | 0.5482502  |
| 12 | C | -3.3551444 | -0.0140203 | 0.0260637  |
| 13 | C | -4.3458758 | -0.0057256 | 1.0430214  |
| 14 | C | -3.6363263 | 0.0049521  | 2.2356016  |
| 15 | N | 2.3152705  | 0.0012795  | 1.8908712  |
| 16 | N | 2.1264831  | 0.0013043  | 0.5305183  |
| 17 | C | 3.3574190  | -0.0008851 | -0.0017133 |
| 18 | C | 4.3564940  | -0.0015416 | 1.0071096  |
| 19 | C | 3.6568012  | -0.0010504 | 2.2055091  |
| 20 | N | -0.0117205 | -0.0015845 | -2.2270135 |
| 21 | C | -0.0038049 | -1.1707173 | -2.9134747 |
| 22 | C | -0.0098637 | -1.2158683 | -4.3190813 |
| 23 | H | -0.0014096 | -2.1823713 | -4.8410904 |
| 24 | C | -0.0269480 | 0.0029349  | -5.0244035 |
| 25 | H | -0.0330057 | 0.0047176  | -6.1233111 |
| 26 | C | -0.0360933 | 1.2194506  | -4.3149819 |
| 27 | C | -0.0265881 | 1.1697565  | -2.9095491 |
| 28 | C | 0.0077414  | -2.3225053 | -1.9953760 |
| 29 | N | 0.0186192  | -2.1298258 | -0.7017735 |
| 30 | C | 0.0093327  | -3.4656875 | -0.0692407 |
| 31 | C | 0.0230246  | -4.4521762 | -1.2748060 |
| 32 | O | 0.0033812  | -3.5687635 | -2.4556568 |
| 33 | C | -0.0269971 | 2.3185498  | -1.9876264 |
| 34 | N | -0.0232744 | 2.1214749  | -0.6947383 |
| 35 | C | -0.0059693 | 3.4550623  | -0.0577958 |
| 36 | C | -0.0316347 | 4.4457311  | -1.2598020 |
| 37 | O | -0.0268519 | 3.5663758  | -2.4438041 |
| 38 | H | -2.1540329 | 0.0214818  | 4.7014675  |
| 39 | H | -0.0501009 | 2.1876835  | -4.8336500 |
| 40 | H | 0.9362902  | -5.0720354 | -1.3446456 |
| 41 | H | -0.8668082 | -5.1052408 | -1.3384946 |
| 42 | H | -0.9446520 | 5.0672182  | -1.3170847 |
| 43 | H | 0.8584582  | 5.0976479  | -1.3313473 |
| 44 | H | 0.9050016  | 3.5663715  | 0.5650959  |
| 45 | H | -0.8948928 | -3.5801136 | 0.5628318  |
| 46 | H | 5.4432452  | -0.0030620 | 0.8781334  |
| 47 | H | 3.4819840  | -0.0012228 | -1.0909899 |
| 48 | H | -3.4884872 | -0.0229844 | -1.0621359 |
| 49 | H | -5.4336557 | -0.0064826 | 0.9229898  |
| 50 | H | -3.9843494 | 0.0140823  | 3.2730887  |
| 51 | H | 4.0131308  | -0.0016880 | 3.2401946  |
| 52 | H | 0.8942148  | -3.5859814 | 0.5881233  |
| 53 | H | -0.8837478 | 3.5739116  | 0.6092767  |

$[\text{Fe}(\text{L}^1\text{H})(\text{bpp})]^{2+}$ , low-spin

|    |    |            |            |            |
|----|----|------------|------------|------------|
| 1  | Fe | 0.0003460  | 0.0000233  | -0.0925019 |
| 2  | N  | 0.0081872  | 0.0002799  | 1.8126906  |
| 3  | C  | -1.1652063 | 0.0084566  | 2.4925244  |
| 4  | C  | -1.2102585 | 0.0101275  | 3.8936544  |
| 5  | C  | 0.0193766  | 0.0004275  | 4.5802095  |
| 6  | H  | 0.0238019  | 0.0004756  | 5.6790519  |
| 7  | C  | 1.2434250  | -0.0093289 | 3.8837445  |
| 8  | H  | 2.1995372  | -0.0179938 | 4.4216245  |
| 9  | C  | 1.1870396  | -0.0078044 | 2.4829816  |
| 10 | N  | -2.2546864 | 0.0144235  | 1.6051239  |
| 11 | N  | -1.9431263 | 0.0091064  | 0.2581938  |
| 12 | C  | -3.1190095 | 0.0170441  | -0.3895052 |
| 13 | C  | -4.2003610 | 0.0260558  | 0.5323656  |
| 14 | C  | -3.6193173 | 0.0243810  | 1.7929455  |
| 15 | N  | 2.2692095  | -0.0139011 | 1.5866400  |
| 16 | N  | 1.9468101  | -0.0088274 | 0.2422704  |
| 17 | C  | 3.1174468  | -0.0168124 | -0.4148248 |

|    |   |            |            |            |
|----|---|------------|------------|------------|
| 18 | C | 4.2062173  | -0.0256054 | 0.4982968  |
| 19 | C | 3.6353140  | -0.0237542 | 1.7635060  |
| 20 | N | -0.0091367 | -0.0003260 | -2.0061383 |
| 21 | C | -0.0212748 | -1.1815742 | -2.6856533 |
| 22 | C | -0.0296054 | -1.2221728 | -4.0907046 |
| 23 | H | -0.0402355 | -2.1882683 | -4.6131450 |
| 24 | C | -0.0241271 | -0.0008333 | -4.7939149 |
| 25 | H | -0.0299660 | -0.0010342 | -5.8928165 |
| 26 | C | -0.0112648 | 1.2207630  | -4.0912480 |
| 27 | C | -0.0044912 | 1.1806797  | -2.6861752 |
| 28 | C | -0.0206893 | -2.2806396 | -1.7171581 |
| 29 | N | -0.0118730 | -1.9694124 | -0.4410374 |
| 30 | C | -0.0209633 | -3.2367681 | 0.3190759  |
| 31 | C | -0.0038295 | -4.3273471 | -0.7945258 |
| 32 | O | -0.0291367 | -3.5618869 | -2.0578123 |
| 33 | C | 0.0049967  | 2.2801010  | -1.7181204 |
| 34 | N | 0.0091774  | 1.9693220  | -0.4418689 |
| 35 | C | 0.0247420  | 3.2369256  | 0.3177154  |
| 36 | C | 0.0000279  | 4.3271758  | -0.7960809 |
| 37 | O | 0.0097288  | 3.5612224  | -2.0592952 |
| 38 | H | -2.1619534 | 0.0188660  | 4.4393358  |
| 39 | H | -0.0064633 | 2.1866673  | -4.6141282 |
| 40 | H | 0.9136748  | -4.9444354 | -0.8055845 |
| 41 | H | -0.8897993 | -4.9882085 | -0.7940807 |
| 42 | H | -0.9152699 | 4.9475892  | -0.7979058 |
| 43 | H | 0.8883601  | 4.9848388  | -0.8050401 |
| 44 | H | 0.9352483  | 3.2943496  | 0.9482063  |
| 45 | H | -0.9268968 | -3.2942609 | 0.9561643  |
| 46 | H | 5.2740209  | -0.0323066 | 0.2590282  |
| 47 | H | 3.1378049  | -0.0143424 | -1.5102137 |
| 48 | H | -5.2700618 | 0.0327756  | 0.3017306  |
| 49 | H | -3.1481657 | 0.0143729  | -1.4846878 |
| 50 | H | -4.0632345 | 0.0296623  | 2.7933736  |
| 51 | H | 4.0873007  | -0.0288627 | 2.7603197  |
| 52 | H | -0.8552727 | 3.2968654  | 0.9892107  |
| 53 | H | 0.8638824  | -3.2962712 | 0.9841835  |

[Fe(L<sup>2</sup>H)(bpp)]<sup>2+</sup>, high-spin

|    |    |            |            |            |
|----|----|------------|------------|------------|
| 1  | Fe | -0.0000048 | -0.0000001 | -0.1911313 |
| 2  | N  | -0.0000031 | 0.0000002  | 1.9919829  |
| 3  | C  | -0.2917130 | 1.1304943  | 2.6629060  |
| 4  | C  | -0.3048580 | 1.1856967  | 4.0674836  |
| 5  | C  | 0.0000018  | 0.0000010  | 4.7580207  |
| 6  | H  | 0.0000039  | 0.0000014  | 5.8573745  |
| 7  | C  | 0.3048587  | -1.1856953 | 4.0674832  |
| 8  | H  | 0.5404416  | -2.1067867 | 4.6137454  |
| 9  | C  | 0.2917086  | -1.1304936 | 2.6629056  |
| 10 | N  | -0.5782190 | 2.2319451  | 1.8219791  |
| 11 | N  | -0.5278070 | 2.0554554  | 0.4614110  |
| 12 | C  | -0.8456679 | 3.2465471  | -0.0664667 |
| 13 | C  | -1.1045001 | 4.2077582  | 0.9464030  |
| 14 | C  | -0.9242593 | 3.5269756  | 2.1420952  |
| 15 | N  | 0.5782114  | -2.2319450 | 1.8219782  |
| 16 | N  | 0.5277949  | -2.0554556 | 0.4614101  |
| 17 | C  | 0.8456560  | -3.2465472 | -0.0664680 |
| 18 | C  | 1.1044937  | -4.2077573 | 0.9464010  |
| 19 | C  | 0.9242553  | -3.5269747 | 2.1420935  |
| 20 | N  | 0.0000010  | -0.0000002 | -2.3017514 |
| 21 | C  | -1.1390790 | -0.2918341 | -2.9812161 |
| 22 | C  | -1.1790363 | -0.2933623 | -4.3887472 |
| 23 | H  | -2.1143896 | -0.5184780 | -4.9205308 |
| 24 | C  | 0.0000008  | 0.0000005  | -5.0972745 |

|    |   |            |            |            |
|----|---|------------|------------|------------|
| 25 | H | 0.0000004  | 0.0000010  | -6.1960362 |
| 26 | C | 1.1790384  | 0.2933626  | -4.3887482 |
| 27 | C | 1.1390813  | 0.2918335  | -2.9812178 |
| 28 | C | -2.2662769 | -0.5836410 | -2.0728834 |
| 29 | N | -2.0508991 | -0.5241703 | -0.7797765 |
| 30 | C | -3.2249749 | -0.9495465 | 0.0000596  |
| 31 | C | -4.4861797 | -0.8469574 | -0.8858052 |
| 32 | S | -3.8704468 | -1.0234039 | -2.6270898 |
| 33 | C | 2.2662820  | 0.5836399  | -2.0728894 |
| 34 | N | 2.0509034  | 0.5241711  | -0.7797801 |
| 35 | C | 3.2249842  | 0.9495494  | 0.0000621  |
| 36 | C | 4.4861869  | 0.8469537  | -0.8858069 |
| 37 | S | 3.8704500  | 1.0233986  | -2.6270896 |
| 38 | H | -0.5404393 | 2.1067881  | 4.6137463  |
| 39 | H | 2.1143907  | 0.5184783  | -4.9205319 |
| 40 | H | -5.2240090 | -1.6447476 | -0.6846339 |
| 41 | H | -4.9896223 | 0.1363712  | -0.8083900 |
| 42 | H | 5.2240206  | 1.6447397  | -0.6846357 |
| 43 | H | 4.9896246  | -0.1363776 | -0.8083903 |
| 44 | H | 3.3287355  | 0.3262479  | 0.9103266  |
| 45 | H | -3.3287284 | -0.3262449 | 0.9103211  |
| 46 | H | -1.0157874 | 3.8659504  | 3.1784354  |
| 47 | H | 1.0157869  | -3.8659492 | 3.1784335  |
| 48 | H | 0.8764272  | -3.3711905 | -1.1552826 |
| 49 | H | 1.3838400  | -5.2584235 | 0.8208469  |
| 50 | H | -1.3838449 | 5.2584249  | 0.8208495  |
| 51 | H | -0.8764433 | 3.3711899  | -1.1552812 |
| 52 | H | 3.0536752  | 1.9975086  | 0.3345483  |
| 53 | H | -3.0536658 | -1.9975020 | 0.3345523  |

$[\text{Fe}(\text{L}^2\text{H})(\text{bpp})]^{2+}$ , low-spin

|    |    |            |            |            |
|----|----|------------|------------|------------|
| 1  | Fe | 0.0000235  | -0.0000650 | -0.1773179 |
| 2  | N  | 0.0070312  | 0.0016533  | 1.7308452  |
| 3  | C  | -1.1659727 | 0.0457831  | 2.4107579  |
| 4  | C  | -1.2114472 | 0.0500217  | 3.8118951  |
| 5  | C  | 0.0170401  | 0.0029319  | 4.4990621  |
| 6  | H  | 0.0210017  | 0.0034370  | 5.5979168  |
| 7  | C  | 1.2405281  | -0.0447846 | 3.8030835  |
| 8  | H  | 2.1955898  | -0.0841821 | 4.3414805  |
| 9  | C  | 1.1849303  | -0.0418835 | 2.4022712  |
| 10 | N  | -2.2546140 | 0.0862040  | 1.5234056  |
| 11 | N  | -1.9434534 | 0.0800793  | 0.1761386  |
| 12 | C  | -3.1184139 | 0.1175105  | -0.4717134 |
| 13 | C  | -4.1992637 | 0.1481532  | 0.4503741  |
| 14 | C  | -3.6188473 | 0.1266677  | 1.7109663  |
| 15 | N  | 2.2670492  | -0.0833534 | 1.5069715  |
| 16 | N  | 1.9461923  | -0.0789639 | 0.1619684  |
| 17 | C  | 3.1164866  | -0.1169224 | -0.4942296 |
| 18 | C  | 4.2039708  | -0.1461693 | 0.4200888  |
| 19 | C  | 3.6326156  | -0.1230578 | 1.6847940  |
| 20 | N  | -0.0084425 | -0.0020206 | -2.0756784 |
| 21 | C  | -0.0676499 | -1.1891808 | -2.7469724 |
| 22 | C  | -0.0839891 | -1.2224651 | -4.1539008 |
| 23 | H  | -0.1431694 | -2.1818251 | -4.6865576 |
| 24 | C  | -0.0230633 | -0.0047720 | -4.8580423 |
| 25 | H  | -0.0288261 | -0.0058602 | -5.9568491 |
| 26 | C  | 0.0451301  | 1.2143131  | -4.1569993 |
| 27 | C  | 0.0435595  | 1.1838325  | -2.7499151 |
| 28 | C  | -0.1075365 | -2.2989189 | -1.7876907 |
| 29 | N  | -0.0852548 | -1.9610530 | -0.5109015 |
| 30 | C  | 0.0135471  | -3.1360823 | 0.3737945  |
| 31 | C  | -0.4801733 | -4.3744265 | -0.4003916 |

|    |   |            |            |            |
|----|---|------------|------------|------------|
| 32 | S | -0.1471824 | -3.9996263 | -2.1913073 |
| 33 | C | 0.0929751  | 2.2954850  | -1.7932889 |
| 34 | N | 0.0823965  | 1.9601926  | -0.5156752 |
| 35 | C | -0.0076758 | 3.1370604  | 0.3675156  |
| 36 | C | 0.4794965  | 4.3735867  | -0.4137243 |
| 37 | S | 0.1296002  | 3.9953964  | -2.2006087 |
| 38 | H | -2.1625683 | 0.0899073  | 4.3572111  |
| 39 | H | 0.0984184  | 2.1726190  | -4.6921703 |
| 40 | H | 0.0561768  | -5.3005022 | -0.1250907 |
| 41 | H | -1.5694840 | -4.5420787 | -0.2932272 |
| 42 | H | -0.0536673 | 5.3005581  | -0.1352465 |
| 43 | H | 1.5698660  | 4.5407787  | -0.3170696 |
| 44 | H | 0.5941499  | 2.9812613  | 1.2839935  |
| 45 | H | -0.5800672 | -2.9786345 | 1.2953279  |
| 46 | H | -4.0628123 | 0.1380807  | 2.7113218  |
| 47 | H | 4.0838018  | -0.1326577 | 2.6819392  |
| 48 | H | -3.1469082 | 0.1212107  | -1.5668376 |
| 49 | H | -5.2683884 | 0.1825295  | 0.2195278  |
| 50 | H | 5.2714255  | -0.1800906 | 0.1815829  |
| 51 | H | 3.1371463  | -0.1217229 | -1.5895290 |
| 52 | H | 1.0788896  | -3.2490676 | 0.6767119  |
| 53 | H | -1.0701675 | 3.2511129  | 0.6799887  |

[Fe(L<sup>1</sup>H)(terpy)]<sup>2+</sup>, high-spin

|    |    |            |            |            |
|----|----|------------|------------|------------|
| 1  | Fe | -0.0000008 | -0.0000019 | -0.0925732 |
| 2  | N  | -0.0000006 | -0.0000003 | 2.0410695  |
| 3  | C  | 1.1270904  | -0.3623671 | 2.7005787  |
| 4  | C  | 1.1586593  | -0.3678188 | 4.1108868  |
| 5  | C  | -0.0000002 | -0.0000002 | 4.8127254  |
| 6  | H  | -0.0000002 | -0.0000002 | 5.9119713  |
| 7  | C  | -1.1586598 | 0.3678185  | 4.1108868  |
| 8  | H  | -2.0637035 | 0.6546624  | 4.6602311  |
| 9  | C  | -1.1270913 | 0.3623667  | 2.7005788  |
| 10 | C  | 2.2756199  | -0.7493037 | 1.8272215  |
| 11 | N  | 2.0409497  | -0.6955130 | 0.4844212  |
| 12 | C  | 3.0213213  | -1.0466180 | -0.3706771 |
| 13 | C  | 3.5275005  | -1.1556124 | 2.3319013  |
| 14 | C  | -2.2756206 | 0.7493042  | 1.8272216  |
| 15 | N  | -2.0409502 | 0.6955144  | 0.4844212  |
| 16 | C  | -3.0213213 | 1.0466220  | -0.3706768 |
| 17 | C  | -3.5275005 | 1.1556139  | 2.3319019  |
| 18 | N  | -0.0000005 | -0.0000012 | -2.2227078 |
| 19 | C  | 0.4148854  | 1.0953377  | -2.9085545 |
| 20 | C  | 0.4314055  | 1.1389249  | -4.3140602 |
| 21 | H  | 0.7730932  | 2.0441866  | -4.8341010 |
| 22 | C  | 0.0000005  | -0.0000010 | -5.0220037 |
| 23 | H  | 0.0000011  | -0.0000010 | -6.1208476 |
| 24 | C  | -0.4314051 | -1.1389270 | -4.3140605 |
| 25 | C  | -0.4148861 | -1.0953398 | -2.9085549 |
| 26 | C  | 0.8194672  | 2.1722206  | -1.9892852 |
| 27 | N  | 0.7486367  | 1.9905289  | -0.6959825 |
| 28 | C  | 1.2174165  | 3.2394044  | -0.0605394 |
| 29 | C  | 1.5574418  | 4.1690028  | -1.2637171 |
| 30 | O  | 1.2594399  | 3.3406362  | -2.4470593 |
| 31 | C  | -0.8194679 | -2.1722227 | -1.9892853 |
| 32 | N  | -0.7486368 | -1.9905310 | -0.6959829 |
| 33 | C  | -1.2174159 | -3.2394072 | -0.0605406 |
| 34 | C  | -1.5574422 | -4.1690047 | -1.2637186 |
| 35 | O  | -1.2594403 | -3.3406378 | -2.4470603 |
| 36 | H  | 2.0637032  | -0.6546624 | 4.6602309  |
| 37 | H  | -0.7730923 | -2.0441888 | -4.8341014 |
| 38 | H  | 0.9261183  | 5.0745387  | -1.3293516 |

|    |   |            |            |            |
|----|---|------------|------------|------------|
| 39 | H | 2.6219885  | 4.4614344  | -1.3265270 |
| 40 | H | -0.9261195 | -5.0745409 | -1.3293539 |
| 41 | H | -2.6219891 | -4.4614357 | -1.3265285 |
| 42 | H | -2.0979072 | -3.0325328 | 0.5815070  |
| 43 | H | 2.0979082  | 3.0325291  | 0.5815074  |
| 44 | H | -2.7809481 | 0.9857340  | -1.4432363 |
| 45 | H | 2.7809482  | -0.9857287 | -1.4432366 |
| 46 | H | 3.7136659  | -1.1935107 | 3.4125871  |
| 47 | H | -3.7136657 | 1.1935116  | 3.4125878  |
| 48 | C | 4.5458166  | -1.5186002 | 1.4362833  |
| 49 | H | 5.5270649  | -1.8387871 | 1.8149051  |
| 50 | H | 5.0576400  | -1.7444066 | -0.6792578 |
| 51 | C | 4.2906517  | -1.4671194 | 0.0568419  |
| 52 | C | -4.5458160 | 1.5186038  | 1.4362841  |
| 53 | H | -5.5270640 | 1.8387913  | 1.8149062  |
| 54 | H | -5.0576388 | 1.7444139  | -0.6792569 |
| 55 | C | -4.2906510 | 1.4671246  | 0.0568425  |
| 56 | H | 0.4241086  | 3.6584749  | 0.5911702  |
| 57 | H | -0.4241075 | -3.6584782 | 0.5911679  |

$[\text{Fe}(\text{L}^1\text{H})(\text{terpy})]^{2+}$ , low-spin

|    |    |            |            |            |
|----|----|------------|------------|------------|
| 1  | Fe | 0.0000006  | -0.0000004 | -0.0745423 |
| 2  | N  | 0.0000005  | -0.0000007 | 1.8205195  |
| 3  | C  | 1.1330851  | -0.3652552 | 2.4885305  |
| 4  | C  | 1.1585448  | -0.3717675 | 3.8959519  |
| 5  | C  | 0.0000003  | -0.0000021 | 4.5997129  |
| 6  | H  | -0.0000002 | -0.0000024 | 5.6984351  |
| 7  | C  | -1.1585439 | 0.3717643  | 3.8959520  |
| 8  | H  | -2.0675693 | 0.6623949  | 4.4381670  |
| 9  | C  | -1.1330840 | 0.3652535  | 2.4885307  |
| 10 | C  | 2.2239633  | -0.7202042 | 1.5652408  |
| 11 | N  | 1.8714855  | -0.6168167 | 0.2371701  |
| 12 | C  | 2.7967292  | -0.9183028 | -0.7037230 |
| 13 | C  | 3.5148528  | -1.1245556 | 1.9527824  |
| 14 | C  | -2.2239621 | 0.7202036  | 1.5652414  |
| 15 | N  | -1.8714843 | 0.6168167  | 0.2371705  |
| 16 | C  | -2.7967280 | 0.9183041  | -0.7037223 |
| 17 | C  | -3.5148512 | 1.1245557  | 1.9527832  |
| 18 | N  | 0.0000015  | -0.0000010 | -1.9929698 |
| 19 | C  | 0.3673770  | 1.1237662  | -2.6737260 |
| 20 | C  | 0.3792003  | 1.1618234  | -4.0791860 |
| 21 | H  | 0.6781422  | 2.0797390  | -4.6031176 |
| 22 | C  | 0.0000039  | -0.0000023 | -4.7819048 |
| 23 | H  | 0.0000054  | -0.0000030 | -5.8807724 |
| 24 | C  | -0.3791942 | -1.1618272 | -4.0791857 |
| 25 | C  | -0.3673734 | -1.1237684 | -2.6737257 |
| 26 | C  | 0.7069321  | 2.1653313  | -1.7022512 |
| 27 | N  | 0.6166271  | 1.8593607  | -0.4272885 |
| 28 | C  | 1.0266670  | 3.0541606  | 0.3403521  |
| 29 | C  | 1.3098831  | 4.1141653  | -0.7644319 |
| 30 | O  | 1.1006208  | 3.3878926  | -2.0337230 |
| 31 | C  | -0.7069309 | -2.1653324 | -1.7022507 |
| 32 | N  | -0.6166268 | -1.8593612 | -0.4272880 |
| 33 | C  | -1.0266679 | -3.0541606 | 0.3403526  |
| 34 | C  | -1.3098948 | -4.1141598 | -0.7644304 |
| 35 | O  | -1.1006221 | -3.3878930 | -2.0337219 |
| 36 | H  | 2.0675699  | -0.6623991 | 4.4381668  |
| 37 | H  | -0.6781349 | -2.0797435 | -4.6031168 |
| 38 | H  | 0.6081765  | 4.9683899  | -0.7580915 |
| 39 | H  | 2.3473735  | 4.4934056  | -0.7713295 |
| 40 | H  | -0.6082038 | -4.9683918 | -0.7580879 |
| 41 | H  | -2.3473869 | -4.4933830 | -0.7713293 |

|    |   |            |            |            |
|----|---|------------|------------|------------|
| 42 | H | -1.9243511 | -2.8245239 | 0.9495006  |
| 43 | H | 1.9243561  | 2.8245254  | 0.9494942  |
| 44 | H | -2.4844861 | 0.8292781  | -1.7529080 |
| 45 | H | 2.4844874  | -0.8292762 | -1.7529086 |
| 46 | H | 3.7710213  | -1.1990406 | 3.0177127  |
| 47 | H | -3.7710196 | 1.1990399  | 3.0177136  |
| 48 | C | 4.4678082  | -1.4293165 | 0.9699845  |
| 49 | H | 5.4816731  | -1.7436948 | 1.2550026  |
| 50 | H | 4.8098543  | -1.5543367 | -1.1875960 |
| 51 | C | 4.0993614  | -1.3246318 | -0.3817444 |
| 52 | C | -4.4678064 | 1.4293181  | 0.9699857  |
| 53 | H | -5.4816711 | 1.7436968  | 1.2550043  |
| 54 | H | -4.8098526 | 1.5543401  | -1.1875948 |
| 55 | C | -4.0993599 | 1.3246340  | -0.3817433 |
| 56 | H | 0.2210433  | 3.3657544  | 1.0344805  |
| 57 | H | -0.2210418 | -3.3657597 | 1.0344733  |

[Fe(L<sup>2</sup>H)(terpy)]<sup>2+</sup>, high-spin

|    |    |            |            |            |
|----|----|------------|------------|------------|
| 1  | Fe | 0.0000022  | 0.0000016  | -0.1732304 |
| 2  | N  | 0.0000020  | 0.0000013  | 1.9685906  |
| 3  | C  | 0.7734751  | -0.8967999 | 2.6276896  |
| 4  | C  | 0.7977305  | -0.9177178 | 4.0378854  |
| 5  | C  | 0.0000006  | 0.0000010  | 4.7396713  |
| 6  | H  | 0.0000000  | 0.0000007  | 5.8389371  |
| 7  | C  | -0.7977287 | 0.9177197  | 4.0378849  |
| 8  | H  | -1.4208376 | 1.6337785  | 4.5875875  |
| 9  | C  | -0.7734720 | 0.8968020  | 2.6276890  |
| 10 | C  | 1.5552357  | -1.8226546 | 1.7528639  |
| 11 | N  | 1.3918723  | -1.6432173 | 0.4104398  |
| 12 | C  | 2.0544848  | -2.4414327 | -0.4489037 |
| 13 | C  | 2.4059151  | -2.8287689 | 2.2539405  |
| 14 | C  | -1.5552330 | 1.8226552  | 1.7528624  |
| 15 | N  | -1.3918703 | 1.6432162  | 0.4104382  |
| 16 | C  | -2.0544853 | 2.4414296  | -0.4489053 |
| 17 | C  | -2.4059127 | 2.8287697  | 2.2539385  |
| 18 | N  | 0.0000001  | 0.0000020  | -2.2842491 |
| 19 | C  | 0.9034030  | 0.7541599  | -2.9668103 |
| 20 | C  | 0.9372465  | 0.7730698  | -4.3740694 |
| 21 | H  | 1.6843849  | 1.3797304  | -4.9053040 |
| 22 | C  | -0.0000007 | 0.0000008  | -5.0836247 |
| 23 | H  | -0.0000001 | 0.0000008  | -6.1822831 |
| 24 | C  | -0.9372471 | -0.7730669 | -4.3740710 |
| 25 | C  | -0.9034041 | -0.7541564 | -2.9668108 |
| 26 | C  | 1.7992205  | 1.4986028  | -2.0607323 |
| 27 | N  | 1.6353280  | 1.3478583  | -0.7670522 |
| 28 | C  | 2.5189349  | 2.2286345  | 0.0139455  |
| 29 | C  | 3.7049571  | 2.6660592  | -0.8731841 |
| 30 | S  | 3.0631872  | 2.5836766  | -2.6121232 |
| 31 | C  | -1.7992226 | -1.4985985 | -2.0607372 |
| 32 | N  | -1.6353285 | -1.3478561 | -0.7670569 |
| 33 | C  | -2.5189386 | -2.2286378 | 0.0139474  |
| 34 | C  | -3.7049589 | -2.6660626 | -0.8731869 |
| 35 | S  | -3.0631879 | -2.5836717 | -2.6121241 |
| 36 | H  | 1.4208381  | -1.6337772 | 4.5875883  |
| 37 | H  | -1.6843850 | -1.3797272 | -4.9053052 |
| 38 | H  | 4.0472832  | 3.6960821  | -0.6655433 |
| 39 | H  | 4.5706942  | 1.9788596  | -0.8046940 |
| 40 | H  | -4.0472831 | -3.6960858 | -0.6655457 |
| 41 | H  | -4.5706979 | -1.9788655 | -0.8046935 |
| 42 | H  | -2.8743666 | -1.7052465 | 0.9232418  |
| 43 | H  | 2.8743623  | 1.7052449  | 0.9232383  |
| 44 | H  | 2.5354772  | -2.9708859 | 3.3342871  |



|    |   |            |            |            |
|----|---|------------|------------|------------|
| 45 | H | 1.8874170  | -2.2505335 | -1.5200448 |
| 46 | H | -1.8874197 | 2.2505286  | -1.5200464 |
| 47 | H | -2.5354743 | 2.9708875  | 3.3342850  |
| 48 | C | 3.0935938  | -3.6590833 | 1.3542198  |
| 49 | H | 3.7600536  | -4.4486758 | 1.7298341  |
| 50 | H | 3.4346176  | -4.0929015 | -0.7630386 |
| 51 | C | 2.9164698  | -3.4655647 | -0.0248147 |
| 52 | C | -2.9164698 | 3.4655622  | -0.0248167 |
| 53 | H | -3.4346188 | 4.0928976  | -0.7630409 |
| 54 | C | -3.0935924 | 3.6590829  | 1.3542177  |
| 55 | H | -3.7600522 | 4.4486754  | 1.7298316  |
| 56 | H | 1.9215621  | 3.1062087  | 0.3484943  |
| 57 | H | -1.9215615 | -3.1062123 | 0.3484926  |

[Fe(L<sup>2</sup>H)(terpy)]<sup>2+</sup>, low-spin

|    |    |            |            |            |
|----|----|------------|------------|------------|
| 1  | Fe | 0.0000002  | -0.0000001 | -0.1521551 |
| 2  | N  | 0.0000000  | 0.0000000  | 1.7451973  |
| 3  | C  | 0.7416319  | -0.9312773 | 2.4145121  |
| 4  | C  | 0.7586833  | -0.9511610 | 3.8217234  |
| 5  | C  | -0.0000007 | -0.0000003 | 4.5257954  |
| 6  | H  | -0.0000012 | -0.0000005 | 5.6245134  |
| 7  | C  | -0.7586844 | 0.9511607  | 3.8217232  |
| 8  | H  | -1.3532175 | 1.6977999  | 4.3638658  |
| 9  | C  | -0.7416322 | 0.9312773  | 2.4145119  |
| 10 | C  | 1.4500150  | -1.8347691 | 1.4926035  |
| 11 | N  | 1.2251439  | -1.5470681 | 0.1642192  |
| 12 | C  | 1.8246038  | -2.3132116 | -0.7771658 |
| 13 | C  | 2.2797696  | -2.9029356 | 1.8807395  |
| 14 | C  | -1.4500150 | 1.8347691  | 1.4926031  |
| 15 | N  | -1.2251437 | 1.5470680  | 0.1642188  |
| 16 | C  | -1.8246033 | 2.3132116  | -0.7771663 |
| 17 | C  | -2.2797692 | 2.9029357  | 1.8807389  |
| 18 | N  | 0.0000000  | -0.0000001 | -2.0537754 |
| 19 | C  | 0.9311972  | 0.7376209  | -2.7290630 |
| 20 | C  | 0.9607961  | 0.7519047  | -4.1364171 |
| 21 | H  | 1.7212015  | 1.3398235  | -4.6688936 |
| 22 | C  | -0.0000010 | 0.0000009  | -4.8397958 |
| 23 | H  | -0.0000014 | 0.0000014  | -5.9385248 |
| 24 | C  | -0.9607975 | -0.7519034 | -4.1364170 |
| 25 | C  | -0.9311977 | -0.7376206 | -2.7290629 |
| 26 | C  | 1.7990608  | 1.4291841  | -1.7706470 |
| 27 | N  | 1.5313219  | 1.2174588  | -0.4936797 |
| 28 | C  | 2.3653678  | 2.0426525  | 0.3975614  |
| 29 | C  | 3.6200308  | 2.4909004  | -0.3800858 |
| 30 | S  | 3.1132206  | 2.5097329  | -2.1708237 |
| 31 | C  | -1.7990609 | -1.4291841 | -1.7706468 |
| 32 | N  | -1.5313216 | -1.2174590 | -0.4936795 |
| 33 | C  | -2.3653670 | -2.0426532 | 0.3975617  |
| 34 | C  | -3.6200302 | -2.4909009 | -0.3800853 |
| 35 | S  | -3.1132206 | -2.5097330 | -2.1708233 |
| 36 | H  | 1.3532159  | -1.6978005 | 4.3638661  |
| 37 | H  | -1.7212032 | -1.3398219 | -4.6688933 |
| 38 | H  | 3.9666423  | 3.5015741  | -0.0984445 |
| 39 | H  | 4.4638113  | 1.7804197  | -0.2817939 |
| 40 | H  | -3.9666417 | -3.5015745 | -0.0984441 |
| 41 | H  | -4.4638107 | -1.7804201 | -0.2817929 |
| 42 | H  | -2.6402728 | -1.4726579 | 1.3058686  |
| 43 | H  | 2.6402739  | 1.4726570  | 1.3058681  |
| 44 | H  | 2.4415995  | -3.1158975 | 2.9455682  |
| 45 | H  | 1.6246840  | -2.0556532 | -1.8258060 |
| 46 | H  | -1.6246833 | 2.0556530  | -1.8258065 |
| 47 | H  | -2.4415994 | 3.1158978  | 2.9455675  |

|    |   |            |            |            |
|----|---|------------|------------|------------|
| 48 | C | 2.8933816  | -3.6932082 | 0.8979870  |
| 49 | H | 3.5418051  | -4.5333436 | 1.1838101  |
| 50 | H | 3.1194496  | -3.9811078 | -1.2593722 |
| 51 | C | 2.6611159  | -3.3908430 | -0.4541566 |
| 52 | C | -2.6611150 | 3.3908430  | -0.4541577 |
| 53 | H | -3.1194485 | 3.9811078  | -1.2593734 |
| 54 | C | -2.8933808 | 3.6932083  | 0.8979860  |
| 55 | H | -3.5418039 | 4.5333440  | 1.1838089  |
| 56 | H | 1.7573518  | 2.9165525  | 0.7222651  |
| 57 | H | -1.7573508 | -2.9165533 | 0.7222649  |

---

## References

1. M. K. Tse, S. Bhor, M. Klawonn, G. Anilkumar, H. Jiao, C. Döbler, A. Spannenberg, W. Mägerlein, H. Hugel and M. Beller, *Chem. – Eur. J.*, 2006, **12**, 1855.
2. N. Shahid, K. E. Burrows, C. M. Pask, O. Cespedes, M. J. Howard, P. C. McGowan and M. A. Halcrow, *Inorg. Chem.*, 2021, **60**, 14336.
3. D. L. Jameson and K. A. Goldsby, *J. Org. Chem.*, 1990, **55**, 4992.
4. K. E. Burrows, S. E. McGrath, R. Kulmaczewski, O. Cespedes, S. A. Barrett and M. A. Halcrow, *Chem. – Eur. J.*, 2017, **23**, 9067.
5. J. Elhaik, D. J. Evans, C. A. Kilner and M. A. Halcrow, *Dalton Trans.*, 2005, 1693.
6. J. M. Holland, J. A. McAllister, C. A. Kilner, M. Thornton-Pett, A. J. Bridgeman and M. A. Halcrow, *J. Chem. Soc. Dalton Trans.*, 2002, 548.
7. P. Zimmer, P. Müller, L. Burkhardt, R. Schepper, A. Neuba, J. Steube, F. Dietrich, U. Flörke, S. Mangold, M. Gerhards and M. Bauer, *Eur. J. Inorg. Chem.*, 2017, 1504.
8. G. M. Sheldrick, *Acta Cryst. Sect. C: Struct. Chem.*, 2015, **71**, 3.
9. L. J. Barbour, *J. Appl. Cryst.*, 2020, **53**, 1141.
10. O. V. Dolomanov, L. J. Bourhis, R. J. Gildea, J. A. K. Howard and H. Puschmann, *J. Appl. Cryst.*, 2009, **42**, 339.
11. A. L. Spek, *Acta Cryst. Sect. D: Biol. Cryst.*, 2009, **65**, 148.
12. P. Guionneau, M. Marchivie, G. Bravic, J.-F. Létard and D. Chasseau, *Top. Curr. Chem.*, 2004, **234**, 97.
13. I. Capel Berdiell, R. Kulmaczewski and M. A. Halcrow, *Inorg. Chem.*, 2017, **56**, 8817.
14. J. K. McCusker, A. L. Rheingold and D. N. Hendrickson, *Inorg. Chem.*, 1996, **35**, 2100.
15. M. A. Halcrow, *Coord. Chem. Rev.*, 2009, 253, 2493.
16. L. J. Kershaw Cook, R. Mohammed, G. Sherborne, T. D. Roberts, S. Alvarez and M. A. Halcrow, *Coord. Chem. Rev.*, 2015, **289–290**, 2.
17. G. A. Craig, O. Roubeau and G. Aromí, *Coord. Chem. Rev.*, 2014, **269**, 13.
18. See eg
  - a) E. C. Constable, G. Baum, E. Bill, R. Dyson, R. van Eldik, D. Fenske, S. Kaderli, D. Morris, A. Neubrand, M. Neuburger, D. R. Smith, K. Wieghardt, M. Zehnder and A. D. Zuberbühler, *Chem. – Eur. J.*, 1999, **5**, 498;
  - b) S. Y. Brauchli, E. C. Constable, K. Harris, D. Häussinger, C. E. Housecroft, P. J. Rösel and J. A. Zampese, *Dalton Trans.*, 2010, **39**, 10739;
  - c) S. M. Fatur, S. G. Shepard, R. F. Higgins, M. P. Shores and N. H. Damrauer, *J. Am. Chem. Soc.*, 2017, **139**, 449 and 2018, **140**, 1181 (correction).
19. A. Kimura and T. Ishida, *Inorganics*, 2017, **5**, 52.
20. S. Vela, J. J. Novoa and J. Ribas-Arino, *Phys. Chem. Chem. Phys.*, 2014, **16**, 27012.
21. See e.g.
  - a) M. Clemente-León, E. Coronado, M. C. Giménez-López and F. M. Romero, *Inorg. Chem.*, 2007, **46**, 11266;
  - b) J. J. M. Amooore, S. M. Neville, B. Moubaraki, S. S. Iremonger, K. S. Murray, J.-F. Létard and C. J. Kepert, *Chem. – Eur. J.*, 2010, **16**, 1973;
  - c) T. D. Roberts, F. Tuna, T. L. Malkin, C. A. Kilner and M. A. Halcrow, *Chem. Sci.*, 2012, **3**, 349;
  - d) W. Phonsri, C. G. Davies, G. N. L. Jameson, B. Moubaraki and K. S. Murray, *Chem. – Eur. J.*, 2016, **22**, 1322;
  - e) R. G. Miller and S. Brooker, *Chem. Sci.*, 2016, **7**, 2501;
  - f) C. Bartual-Murgui, C. Codina, O. Roubeau and G. Aromí, *Chem. – Eur. J.*, 2016, **22**, 12767;
  - g) J. E. Clements, P. R. Airey, F. Ragon, V. Shang, C. J. Kepert and S. M. Neville, *Inorg. Chem.*, 2018, **57**, 14930;
  - h) N. Li, J.-P. Xue, J.-L. Liu, Y.-Y. Wang, Z.-S. Yao and J. Tao, *Dalton Trans.*, 2020, **49**, 998;

- i) I. Capel Berdiell, R. Kulmaczewski, N. Shahid, O. Cespedes and M. A. Halcrow, *Chem. Commun.*, 2021, **57**, 6566;
- j) F.-L. Yang, W.-H. Wu, Y.-Q. Wang, X. Chen, B.-B. Liang, H.-L. Mi, G.-L. Zhang, X.-Y. Chen and Y. Shi, *Cryst. Growth Des.*, 2021, **21**, 6671.
22. A. J. Gordon and R. A. Ford, *The Chemists Companion – A Handbook of Practical Data, Techniques and References*, John Wiley, Chichester, 1972, p. 109.
23. W. Linert, M. Konecny and F. Renz, *J. Chem. Soc. Dalton Trans.*, 1994, 1523.
24. See eg
- a) A. T. Baker and H. A. Goodwin, *Aust. J. Chem.*, 1985, **38**, 207;
- b) P. Laine, A. Gourdon and J.-P. Launay, *Inorg. Chem.*, 1995, **34**, 5156;
- c) H. Oshio, H. Spiering, V. Ksenofontov, F. Renz and P. Gütllich, *Inorg. Chem.*, 2001, **40**, 1143;
- d) Y. Nakayama, Y. Baba, H. Yasuda, K. Kawakita and N. Ueyama, *Macromolecules*, 2003, **36**, 7953;
- e) M. A. Tershansy, A. M. Goforth, L. Peterson, M. C. Burns, M. D. Smith and H.-C. zur Loye, *Solid State Sci.*, 2007, **9**, 895;
- f) J. S. Ovens, A. R. Geisheimer, A. A. Bokov, Z.-G. Ye and D. B. Leznoff, *Inorg. Chem.*, 2010, **49**, 9609.
25. K. Lashgari, M. Kritikos, R. Norrestam and T. Norrby, *Acta Cryst. Sect. C*, 1999, **55**, 64.
